# Supplementary material for: Candidate genes in gastric cancer identified by constructing a weighted gene co-expression network
Source: PeerJ. 2018 May 4;6:e4692. doi: 10.7717/peerj.4692 (PMC5937478; doi:10.7717/peerj.4692)
Supplement: Table S1 [file peerj-06-4692-s002.xlsx]

## Sheet: MEs before module merging
	MEblack	MEblue	MEbrown	MEcyan	MEdarkgreen	MEdarkred	MEgreen	MEgreenyellow	MEgrey	MEgrey60	MElightcyan	MElightgreen	MElightyellow	MEmagenta	MEmidnightblue	MEpink	MEpurple	MEred	MEroyalblue	MEsalmon	MEtan	MEturquoise	MEyellow
TCGA-D7-A748-01	-0.0993704	-0.108822	0.0438425	-0.000901165	-0.0318084	-0.0357953	0.0509963	-0.0110712	0.0606581	-0.0776755	0.0190619	-0.0602991	-0.0826653	-0.0735887	-0.0150914	-0.0615847	0.0295879	0.12215	-0.0484252	-0.0564972	0.14837	-0.0240855	0.0370101
TCGA-BR-8289-01	0.0511422	0.0149467	0.0143314	-0.0253776	0.0305594	-0.00910357	0.0169996	-0.0247292	-0.018275	0.0348812	-0.0310321	0.0195072	0.00189008	0.0399234	-0.0418254	0.0610356	0.00969474	0.010237	0.0166361	0.0175015	-0.0130347	-0.0114848	0.0164204
TCGA-CG-4465-01	-0.0485499	0.0694718	-0.0550843	-0.00349265	-0.0118701	-0.0347338	-0.0808794	-0.0140244	-0.0288169	-0.0697161	-0.0110027	-0.0542649	-0.019761	-0.0612443	0.0276124	-0.0125947	-0.0031076	-0.00274762	-0.025318	-0.0706751	0.0593288	0.0531117	0.0469806
TCGA-VQ-A8DZ-01	0.0673166	0.00130841	0.0648352	-0.0301599	0.0480753	-0.0182349	-0.0236372	0.0182379	-0.0196841	0.138794	-0.0446308	0.0798195	0.0345048	0.0297722	-0.043298	0.0516666	-0.00998827	-0.0245551	0.0350002	-0.0209255	-0.0347443	0.0422689	0.0870915
TCGA-R5-A7ZI-01	-0.0714871	-0.0445064	0.120355	-0.0128736	-0.0337379	0.00983894	-0.02903	-0.0394366	0.00193544	-0.0049091	0.0168539	-0.00208836	-0.0452445	-0.0124551	0.0770633	0.0488136	0.10187	-0.0603374	-0.0370704	-0.025381	0.0725777	0.0196465	0.13919
TCGA-CG-4301-01	-0.026847	-0.009416	-0.0945323	-0.0116346	0.0264341	-0.0539931	-0.029111	-0.0029273	0.0331699	-0.104448	0.00118287	-0.0696275	0.00632083	-0.100864	-0.0326354	-0.0662446	-0.0420357	0.0157884	-0.0309899	-0.0834739	0.0199005	0.0112095	0.00639783
TCGA-BR-7196-01	0.00386294	-0.0179023	-0.00810075	0.0246281	-0.0163991	-0.0181053	0.149957	-0.0181873	-0.0223483	-0.0070525	0.0542399	0.0118345	-0.0296245	0.0309011	0.0246071	-0.00208005	-0.026022	0.0971909	0.000773093	0.0450624	0.0455086	-0.0582139	-0.0471586
TCGA-CG-4462-01	-0.053779	-0.0584656	-0.0774626	0.0379259	-0.030161	-0.046212	0.130688	-0.0147566	0.039333	-0.0866007	0.0494151	-0.05893	-0.055125	-0.0707462	-0.036463	-0.0853043	-0.0659166	0.151589	-0.0378857	-0.0759394	0.130357	-0.0464188	-0.0564234
TCGA-IN-A7NR-01	-0.0636052	-0.0612843	0.0176623	-0.0308421	-0.016184	-0.0128938	-0.00748675	0.114439	0.0287172	-0.0486791	-0.0177251	-0.0593511	-0.0453067	-0.0483855	-0.0241235	-0.0468784	0.0371784	-0.0419436	-0.0378179	-0.0194315	-0.0388864	-0.00709965	0.0270869
TCGA-CG-4440-01	0.0194026	0.105278	-0.0243474	-0.0145115	-0.00240573	0.0403559	-0.0611908	0.0119666	0.0102021	-0.009954	-0.0411624	0.0164153	0.0240745	-0.0260582	0.00419856	0.069755	-0.019624	-0.0226922	0.0100276	0.0514412	-0.0201882	0.0290651	0.0379523
TCGA-CG-5724-01	-0.00716937	-0.00603812	0.168686	-0.000327983	0.0224424	0.0759084	-0.0126302	0.1335	-0.0405379	0.0282277	-0.0425433	0.0385885	-0.0787402	0.12642	0.00448264	0.163225	0.0698301	0.0344744	0.00906108	0.0646662	-0.00419294	-0.00556539	0.0417292
TCGA-IN-7808-01	-0.023936	-0.048599	0.02102	0.111936	-0.0252158	-0.00303386	0.0393984	-0.0430765	-0.0379073	-0.0421715	0.239802	0.00335236	0.0640936	-0.0207909	-0.0320233	-0.0165759	0.0701241	-0.0346933	-0.0357133	0.0250087	0.0145171	-0.0180537	-0.0307478
TCGA-CG-4306-01	-0.0519692	0.0642499	-0.0593939	-0.00322752	-0.0254418	-0.0369078	-0.0671142	-0.00111048	0.0321276	-0.0749954	0.00666137	-0.0570536	0.00807859	-0.0620539	0.0310463	-0.0170744	0.00262637	0.0111787	-0.0180271	-0.063737	0.02202	0.0322463	0.0607997
TCGA-CG-5722-01	-0.0230934	0.00291963	0.11209	0.0909257	-0.013108	-0.0125583	0.031906	-0.00174931	0.0418811	0.0050274	0.142431	0.00405255	-0.0439572	0.131859	0.0145681	0.0591295	0.0798178	-0.0211007	-0.0029519	0.184351	0.0728169	-0.00437929	0.0378129
TCGA-BR-8372-01	-0.0511241	0.126662	0.0473607	-0.00614246	-0.0227973	-0.0032435	-0.0964258	-0.0276215	-0.0323804	0.0224966	0.00944276	-0.0213765	-0.0356112	0.0458345	0.119299	0.107177	0.124844	-0.0529068	0.0127374	-0.00776447	0.0776179	0.0406755	0.111819
TCGA-CG-4476-01	-0.0064426	-0.00961135	-0.0836305	0.00656195	-0.0244172	-0.0307552	0.0327263	-0.0290086	0.0810598	-0.0736969	0.0325862	-0.00881483	0.00423291	-0.085894	-0.0387816	-0.0568505	-0.0343189	0.0145566	-0.0316926	-0.0952898	0.0486142	-0.0061903	-0.00893986
TCGA-BR-A4CS-01	-0.0171143	-0.0581108	0.0388666	-0.0398837	0.0342751	-0.0315446	-0.00117956	-0.0303592	-0.0197642	0.0157467	-0.0393584	0.109467	0.0591878	-0.0579144	-0.0206337	-0.0347016	0.00490182	-0.0182305	-0.0266913	-0.0654743	-0.0185477	0.00438986	0.052343
TCGA-BR-8382-01	-0.0565605	-0.00172542	0.0183314	-0.0167832	-0.014019	-0.0162461	-0.0238227	0.00758902	-0.0471305	0.0086198	-0.0110813	-0.0476667	-0.00164649	0.0081014	0.125812	0.00216413	0.0118963	0.0362863	-0.0235664	-0.0166378	0.00985762	0.00887903	0.00987678
TCGA-BR-A4CR-01	0.0459704	0.135607	-0.0777452	-0.0208714	-0.022415	-0.0360378	-0.0390318	-0.0446708	-0.0314605	-0.0293575	-0.051989	0.0855716	0.114455	-0.0040753	-0.0750967	-0.0133896	0.018086	-0.0512337	0.00666052	0.0866543	-0.0742431	-0.00785532	-0.0391121
TCGA-BR-8687-01	0.0540442	-0.0358673	-0.0350747	-0.0297001	-0.0222792	-0.0242478	-0.00828515	-0.0238593	0.0974604	-0.0136959	-0.0441587	-0.0266759	-0.0518679	-0.0159916	-0.067115	-0.034307	-0.0353762	-0.0193867	-0.0146837	-0.0409334	-0.048393	0.0140627	-0.0475383
TCGA-BR-8361-01	-0.0316357	0.0496132	-0.00940011	-0.026931	-0.0196534	-0.0163116	-0.0530687	-0.0177859	-0.0523138	0.0152709	-0.0116446	-0.039656	-0.0134307	0.0403123	0.0588975	0.0466115	0.121348	-0.0506807	-0.0191569	-0.0229637	-0.0257414	0.0202464	-0.0254156
TCGA-BR-8384-01	-0.0541563	-0.0853883	-0.0854931	-0.0128375	-0.0318031	-0.0547497	0.119696	-0.045125	-0.0318451	-0.0791175	0.00697902	-0.0622078	-0.0424359	-0.0747721	-0.0440977	-0.107778	-0.0571043	0.0462779	-0.0479387	-0.0751777	-0.0178936	-0.191804	-0.103773
TCGA-BR-8590-01	-0.00632888	-0.00634649	-0.0594643	0.0150963	-0.0196589	-0.0148746	0.035193	0.00232093	0.0314041	-0.0192439	0.0239292	-0.0271936	-0.0301521	-0.0143672	-0.00623878	-0.0457986	-0.0521199	0.0578125	-0.0340858	-0.0335855	0.0353269	-0.0335588	-0.0530013
TCGA-BR-8296-01	0.0211292	-0.0306017	-0.00774793	0.0392748	-0.0161095	0.0136853	0.022133	-0.00211648	0.00130713	0.0299907	0.0542222	0.0360846	-0.00121045	0.0175333	0.0089723	-0.00430558	-0.0378488	-0.0175082	-0.0076817	0.0317506	-0.00866752	0.0171088	-0.0290039
TCGA-BR-8364-01	-0.0473619	-0.0738025	-0.0546005	0.00262669	-0.0273567	-0.041146	0.118352	-0.0247857	-0.0105566	-0.0755955	0.0163373	-0.0557178	-0.0668489	-0.0417851	-0.0346463	-0.0879131	-0.0402859	0.116694	-0.0351562	-0.0482165	0.0196475	-0.114723	-0.0755494
TCGA-HU-A4GX-01	-0.0352415	0.00571756	0.0240432	-0.0234404	-0.0198593	0.0221533	-0.0604863	-0.0337131	0.0458632	-0.025606	0.0136543	-0.000269323	0.048644	-0.00883662	0.0775959	-0.00272937	0.0567095	-0.0637553	-0.027203	-0.0187684	0.00663869	0.0404253	0.0617321
TCGA-BR-8592-01	-0.0621591	-0.0765007	-0.0550399	-0.0090121	-0.0279127	-0.0510907	0.0986164	-0.0469425	-0.00803711	-0.0774554	0.00950627	-0.0662467	-0.0171834	-0.0669816	-0.0558344	-0.0901437	-0.0199692	0.0428323	-0.0440878	-0.0666913	-0.021418	-0.157532	-0.0707616
TCGA-BR-8589-01	0.0454455	0.058723	0.0106613	0.0266057	-0.0180958	-0.016303	-0.0282996	-0.0192948	-0.0115015	-0.016464	0.0442162	0.0190309	0.0297315	0.0216896	0.0746407	0.0465245	0.0657933	-0.058997	-0.0086266	-0.00221529	0.105344	0.0261617	0.0245612
TCGA-BR-8686-01	0.0296322	-0.0142339	-0.0354855	0.0326558	-0.00751522	-0.018774	0.0787357	-0.0295175	-0.0135551	-0.0451177	0.0764691	-0.00576522	0.0565976	-0.0052377	0.0108237	-0.0282386	-0.0162372	-0.00514842	0.00406789	-0.00901086	0.044724	-0.0319422	-0.0454696
TCGA-HU-A4H0-01	0.0676168	0.113335	-0.0379137	0.0111251	0.0363856	0.0169122	-0.052743	0.00956858	-0.038762	0.0169063	0.00351441	0.0333975	0.0426202	0.0175731	0.132466	0.0538201	-0.0236328	-0.0632859	0.00684429	0.0815066	0.064923	0.0399409	0.00678988
TCGA-VQ-A91Y-01	-1.66712e-05	-0.045312	-0.0676239	0.00875146	-0.0314516	-0.0356225	0.0418061	-0.014188	-0.0186349	-0.0572121	0.0187015	-0.0453593	0.0179144	-0.0663601	0.0353504	-0.0829001	-0.0632346	0.0420279	-0.0367014	-0.0339967	0.0197298	-0.0980472	-0.0594833
TCGA-HU-A4H3-01	-0.0510902	0.00800452	0.0216055	-0.0334776	-0.0118487	0.0325749	-0.0647595	0.0483418	-0.0389635	-0.0142979	-0.0389595	-0.0326901	0.036824	0.018875	-0.00731992	-0.000422065	0.0371038	-0.0324067	-0.0188824	-0.00618019	-0.0318099	0.0340259	0.0525964
TCGA-HF-A5NB-01	-0.0381573	0.0412083	0.0082116	-0.0105186	-0.013921	-0.00747724	-0.0795661	0.0253607	0.0247131	0.043909	-0.0432504	-0.0401706	-0.00353797	0.0356314	-0.00188449	0.0253751	0.0532761	-0.0602093	-0.0144081	0.00603664	-0.0350207	0.0779997	0.00523572
TCGA-BR-8380-01	-0.0545285	-0.0642683	-0.046398	-0.0276607	-0.0245046	-0.0521983	0.0885644	-0.0406742	-0.0122405	-0.0552978	-0.0288643	-0.0547916	-0.063811	-0.0403235	-0.0632279	-0.0683014	-0.0253977	0.0452664	-0.0426468	-0.0387208	-0.0399924	-0.168117	-0.0868378
TCGA-BR-8284-01	-0.0306819	0.0262321	0.00680559	0.0208462	-0.0253064	0.0219629	0.0266449	-0.0293788	0.00352465	-0.00257332	0.0499455	-0.032038	-0.0383922	0.0326427	-0.00121072	0.0194329	0.00157114	0.0131079	-0.0120913	-0.00964466	0.0587589	0.00891503	0.013519
TCGA-VQ-AA6K-01	0.0311286	-0.0175653	-0.0300835	-0.0155532	-0.0139591	-0.0104639	-0.0129452	0.00276547	0.0113348	-0.0258834	-0.0210474	-0.0296807	0.00634816	-0.00863198	0.00259697	-0.0282672	-0.071249	-0.00552285	-0.0283889	0.0572656	-0.0333555	0.0233585	-0.0434886
TCGA-BR-8591-01	-0.0152705	0.0631541	-0.0291133	-0.00269606	-0.00948492	-0.0156452	-0.041134	0.0011866	-0.0276606	0.023096	0.00225031	-0.0369416	-0.00423306	0.0386225	0.0430793	0.0261428	-0.0218296	-0.00680703	-0.00786748	-0.00507232	0.00357567	0.0358582	-0.0156892
TCGA-BR-A4PF-01	0.0133338	0.0780849	-0.0464081	0.00865704	-0.0100459	0.19136	-0.0715807	-0.02234	-0.0430456	-0.012323	-4.68665e-05	0.0217267	0.0585268	-0.0385084	0.0534517	-0.0314079	-0.0116381	-0.0416073	-0.0422722	-0.0579047	0.0278601	0.0435216	-0.000501144
TCGA-BR-8058-01	-0.0246394	-0.0100811	-0.00587499	0.0545269	-0.0210118	-0.0161163	0.0495646	-0.0185437	0.00576265	-0.0305943	0.0830332	-0.0262801	-0.061934	0.0291786	0.0150987	-0.0188909	-0.0301535	0.0549758	-0.0356611	0.00511846	0.0760506	-0.00405785	-0.0260198
TCGA-BR-A4IV-01	-0.0808847	-0.0993376	-0.0502495	-0.0358416	-0.037298	-0.043574	0.0996381	-0.0526029	-0.0499579	-0.0953167	-0.0225999	-0.074017	0.00593966	-0.0888208	-0.0698473	-0.108195	-0.0295879	0.101049	-0.0554127	-0.0777167	-0.0395552	-0.200872	-0.0564735
TCGA-HU-A4GC-01	-0.00707439	-0.0190527	0.0365514	-0.0335609	-0.0213001	0.0300394	-0.0414864	-0.0161716	0.108485	0.010555	-0.0365458	0.0548143	0.042248	-0.0366395	-0.0286656	-0.00278391	0.00494134	-0.0430589	-0.0298147	-0.0295302	-0.0441848	0.0458642	0.0693681
TCGA-BR-8683-01	0.070404	-0.0034172	-0.105984	-0.00263998	0.00179377	0.00632805	0.0359282	0.0165218	-0.0367796	-0.0382625	-0.0179618	-0.0236038	0.0090818	-0.0212716	0.0405674	-0.0687771	-0.0903073	0.0439366	0.301197	-0.0388634	-0.0300494	-0.0190341	-0.0998261
TCGA-BR-A4J4-01	0.0171578	0.0019567	-0.0434834	-0.00240029	0.069083	0.00468992	-0.0470954	0.0719581	-0.0455976	-0.0452376	-0.0273515	-0.0173785	0.0250093	-0.0126411	0.0161996	-0.00725481	-0.0450694	-0.0156814	-0.0280999	-0.0330415	-0.00680149	0.0148306	-0.0145497
TCGA-HU-8608-01	0.0300358	0.0965576	-0.062023	0.0873501	-0.0133123	-0.022004	0.0128147	-0.0237374	-0.0320273	-0.00219318	0.126974	0.00570637	0.0369254	0.0341856	0.210771	0.0206973	-0.0589476	-0.0150543	-0.0108242	0.000990167	0.154973	0.0166093	-0.055686
TCGA-VQ-AA6J-01	0.0396727	0.0355172	-0.0174113	0.0259131	-0.00405484	0.0584566	-0.0134398	-0.01927	-0.0458338	0.00248762	0.0318671	-0.00890805	0.0344495	-0.0330946	0.0248554	0.0262939	-0.0104877	-0.0103078	0.0189159	-0.0585088	0.0294405	0.0213862	-0.0164789
TCGA-BR-A4J5-01	-0.0773324	-0.0690816	-0.0113383	-0.0175622	-0.0257395	-0.0381771	0.0641476	-0.0186114	0.0121356	-0.0713884	-0.0170549	-0.0621808	0.0311768	-0.0562257	-0.0510535	-0.0800391	-0.0188115	0.0822947	-0.0477976	-0.0577161	-0.0169051	-0.0889865	-0.00692998
TCGA-VQ-A8PU-01	0.0303476	-0.0216557	-0.0315165	-0.0301328	-0.00996655	-0.0117704	-0.0538513	-0.00463166	0.0656731	0.0185233	-0.055168	-0.00603846	-0.00172281	-0.017432	-0.0538778	-0.0108243	-0.0324195	-0.0565785	0.0711861	-0.0405022	-0.0606033	0.0714275	-0.0325719
TCGA-BR-7959-01	0.00153567	-0.0285	-0.0501204	-0.00902045	0.00630789	-0.0361004	0.0701022	-0.00370833	-0.0410969	-0.0631639	-0.0234956	-0.00504223	-0.0385167	-0.0225173	-0.0120025	-0.0214004	-0.0190045	0.104105	-0.0389881	-0.0254769	-0.010587	-0.0685091	-0.0843958
TCGA-HU-A4GJ-01	-0.0483455	-0.00134759	-0.0267762	0.235658	-0.020264	-0.030177	0.0291905	-0.048421	0.0316196	-0.0549628	0.316562	-0.0529623	0.0507476	-0.0277932	-0.0238005	-0.0446026	0.0546674	-0.0377327	-0.0269448	-0.0197419	0.0326967	-0.0282549	-0.0219371
TCGA-BR-8485-01	0.0985126	0.0508863	-0.05972	0.00382622	-0.0159492	-0.0185678	0.01611	-0.0141033	-0.00473068	0.013214	-6.38518e-05	0.0452521	0.0477547	-0.0153562	-0.0304662	-0.0252092	-0.0372265	0.0269366	0.0100776	0.00961892	-0.0255778	-0.00759437	-0.0373958
TCGA-BR-8080-01	-0.0322121	-0.0340227	-0.0275633	0.0145477	-0.0218764	-0.0315413	0.100552	-0.018917	-0.0162759	-0.0254942	0.0309225	-0.0331869	-0.0408355	0.000648025	-0.0367169	-0.0320915	-0.0243837	0.0825012	-0.041733	-0.0196549	0.0126789	-0.0720485	-0.0624692
TCGA-VQ-A8PM-01	0.00340197	-0.0287817	-0.0400396	0.0180288	-0.0103509	-0.00970638	0.0175995	-0.0288748	0.0386266	-0.0462315	0.0471272	-0.0442425	-0.00159842	-0.0543289	-0.0185744	-0.0427059	-0.0506554	-0.00969401	-0.026182	-0.0039272	-0.0133302	0.00689038	-0.0221236
TCGA-B7-A5TI-01	-0.0114506	-0.000556311	0.0265064	-0.0183372	-0.00961609	0.0203743	0.0179678	-0.00285579	0.0352848	0.000455036	-0.0146558	-0.0146871	-0.0422621	0.000311846	-0.0438613	0.0419729	-0.00143703	0.0294746	-0.00191636	0.00699971	-0.0218457	0.0446975	0.0270416
TCGA-CG-4438-01	0.0734356	0.0638089	-0.0716376	0.00306488	0.00179937	-0.050382	-0.0528362	0.00111458	-0.00766335	-0.0203467	-0.0026258	0.0848177	0.058459	-0.0876833	0.0322148	-0.0229976	0.00224185	-0.0317953	-0.00477502	-0.0103773	0.03127	0.0225305	0.00924928
TCGA-BR-4368-01	-0.0458432	0.057256	-0.0741969	-0.00060137	-0.0305367	-0.0210843	-0.0286617	0.0110332	-0.0413816	-0.041287	0.0142226	-0.068932	-0.0153895	-0.0384701	-0.00658164	-0.020741	0.0310448	-0.003873	-0.000491023	-0.0614993	0.016781	-0.0279144	-0.0121701
TCGA-HU-A4GY-01	-0.0604269	-0.0479942	-0.0560082	0.0838887	-0.031033	-0.0417773	0.07071	-0.049546	-0.0431898	-0.0753977	0.160432	-0.0571114	0.0699438	-0.0703812	0.00541279	-0.0964794	-0.00817362	0.0364751	-0.0342363	-0.061955	0.102185	-0.0493183	-0.0404137
TCGA-CG-5721-01	-0.0406828	0.00236509	0.0872768	0.0539148	-0.0209516	-0.0159836	-0.00194092	0.00419406	-0.0581315	0.0140604	0.0812824	-0.00338348	-0.0615626	0.0874442	0.207818	0.0668651	0.043131	-0.00362969	0.00348249	0.0377811	0.171049	-0.00475302	0.0108694
TCGA-BR-8059-01	-0.0259015	-0.0438269	0.0415365	-0.0335463	-0.00295304	-0.00278064	0.00842203	0.0172416	-0.0304369	-0.017779	-0.0461013	-0.038373	-0.0579988	0.00203016	-0.0719083	0.00926062	0.0885586	0.0893877	0.00189544	-0.00771551	-0.0396494	-0.0293112	0.0254309
TCGA-VQ-A8PF-01	0.0197479	0.0213582	-0.0456219	0.0610677	-0.0153803	-0.00515393	0.0456196	-0.024447	-0.0018443	-0.0097211	0.104004	0.00209411	0.0115472	0.0117563	0.112392	-0.00712685	-0.0562285	-0.00577126	-0.016779	-0.00591285	0.135265	0.00983516	-0.0499195
TCGA-F1-A448-01	-0.0578011	-0.0306584	-0.00948013	0.0129427	-0.0256199	-0.0302162	0.0225116	-0.00419098	0.0405682	-0.0259504	0.0144062	-0.059688	-0.0106234	-0.0158815	-0.0337665	-0.0284886	-0.0265608	0.0374214	-0.0357417	-0.0383937	0.0164386	0.01059	-0.000150598
TCGA-BR-6709-01	-0.0148142	-0.000986916	0.0132219	0.0865257	-0.0122347	-0.0113606	0.0520921	0.00779932	-0.0438544	0.0444119	0.0925061	-0.0153173	-0.0771489	0.061155	0.0535113	0.0300216	-0.0224651	0.159491	0.010162	0.000127322	0.201634	-0.0618542	-0.0419547
TCGA-D7-8576-01	0.108946	0.0178206	-0.00433809	-0.00702189	-0.0126221	0.00893869	0.00358932	-0.000324498	0.167896	0.0154068	-0.0231077	-0.0169463	-0.0402589	0.0708564	-0.00910299	0.0177698	-0.0642979	-0.0298681	0.0185083	0.0209999	0.0102245	0.0481606	-0.0263322
TCGA-D7-A4YU-01	0.0328605	0.0674923	-0.0634081	0.0664166	-0.0132089	-0.00845013	0.00594536	-0.00852535	-0.0360413	-0.00724954	0.100909	0.0222041	0.0422909	0.0194773	0.176774	-0.0257921	-0.0344558	-0.0188007	0.0225175	0.00504651	0.0593902	-0.0255611	-0.039743
TCGA-VQ-A8DT-01	-0.0502578	-0.00320005	0.0128227	-0.0387997	-0.0163429	0.0789364	-0.0752029	0.00250504	0.0951481	0.00762216	-0.048975	-0.0381965	0.00867907	-0.0283371	-0.0336254	-0.00565877	0.0254715	-0.0780513	-0.0174668	-0.0167936	-0.0513364	0.0685929	0.0490661
TCGA-BR-8677-01	-0.00802758	-0.019079	-0.00234814	0.00771601	-0.0119801	-0.0179018	0.0953738	-0.000790954	-0.0367463	-0.0256893	0.037818	-0.00135995	0.0458177	-0.00551517	0.109891	-0.0191037	0.00637881	0.0706173	-0.00715611	-0.0111421	0.0281242	-0.036156	-0.0224072
TCGA-D7-8570-01	0.0210131	-0.0331371	0.0203995	0.0462962	-0.0237141	-0.00914692	0.0241026	-0.04201	-0.0126976	-0.0178348	0.0711835	0.0385844	-0.0220846	0.0123758	0.0086027	-0.00734656	-0.0288925	0.0230264	-0.0214075	0.0898034	0.187393	-0.000175012	-0.0277693
TCGA-BR-A44U-01	-0.0649551	-0.0468193	0.0346697	-0.0616931	0.154615	0.0355962	-0.0409553	-0.0283194	-0.0263951	0.0479721	-0.0618146	-0.000817817	0.0830511	-0.0683348	-0.0359507	9.02811e-07	0.078206	-0.0242532	-0.048062	-0.0574068	-0.0637816	0.0147672	0.0725509
TCGA-BR-8367-01	-0.0236561	-0.00849114	-0.0804644	-0.0127602	-0.0236543	-0.0409825	0.0455344	-0.0155919	0.0524462	-0.024009	-0.0196189	-0.0607648	-0.0329627	-0.0226303	-0.051205	-0.0567285	-0.0528781	0.0120854	-0.0355934	-0.05558	-0.0229259	-0.0330256	-0.0818359
TCGA-BR-8371-01	-0.0799041	-0.100746	-0.00285807	-0.0139646	-0.0350819	-0.0471365	0.0718634	-0.0542063	-0.0296605	-0.0748648	0.0123657	-0.0499305	-0.0138802	-0.0569536	-0.0553463	-0.0889086	0.0369087	-0.009233	-0.0407065	-0.0469092	-0.0441734	-0.214506	-0.0433465
TCGA-BR-8369-01	-0.00464205	-0.01546	-0.0667219	-0.0318877	-0.0188923	-0.0424169	0.0057934	-0.0106868	0.110143	-0.00163302	-0.0354902	-0.0442721	0.0211514	-0.0409275	-0.0523375	-0.0429689	-0.0376183	-0.0257529	-0.0202479	-0.0396304	-0.0652834	-0.0423691	-0.0541322
TCGA-BR-6705-01	-0.0355056	-0.0699031	0.0304574	-0.00357991	-0.0215735	-0.00753947	0.21631	-0.0182767	-0.0420828	-0.024984	0.00587745	-0.02808	-0.0811624	0.0455644	-0.0350531	-0.0080239	-0.00952289	0.193131	-0.018222	0.011802	-0.00391845	-0.095941	-0.070381
TCGA-BR-7723-01	0.21636	0.0813993	-0.0541502	-0.00773017	0.0143579	-0.0206428	0.0291434	-0.038974	-0.0533281	0.0477706	-0.00593177	0.0117224	0.00542539	0.0250141	-0.0656773	0.0261393	-0.0135839	0.028145	0.0777943	0.084042	-0.00493629	-0.0279917	-0.0538403
TCGA-D7-A6EY-01	-0.0267131	0.0161559	-0.0128215	0.0355734	-0.0121547	-0.0260246	-0.0143804	0.00591516	-0.0431627	0.00293783	0.0462865	-0.0418905	-0.027225	0.0119404	0.100034	0.0233655	-0.00577674	-0.0155141	-0.010537	-0.0142597	0.0363351	0.00802814	-0.0244768
TCGA-VQ-A8PE-01	0.110368	0.0967184	-0.0164553	0.00245641	-0.0193499	-0.0243942	-0.03102	0.00890799	-0.0273811	0.119453	-0.0131951	0.0968278	0.0994938	0.0312933	-0.00221792	0.0627842	-0.008656	-0.0146583	0.0794815	0.0596101	-0.0346707	0.0213093	-0.00234356
TCGA-BR-8676-01	-0.0622565	0.0279953	0.0799627	-0.0344605	-0.028836	-0.0136555	-0.0739973	-0.0605904	0.00376992	-0.0105961	-0.00649764	0.00740441	0.171785	-0.0278313	-0.021492	0.035803	0.200295	-0.0801498	-0.0213096	-0.0131798	0.0110374	0.00134663	0.21411
TCGA-BR-A4J8-01	-0.0334837	-0.0729632	0.0310906	-0.0317781	-0.0261609	0.0136977	0.0420415	-0.0325276	-0.0347721	-0.0622808	-0.0301337	0.0710378	0.0727889	-0.0201421	-0.00643948	-0.0632719	0.0109313	-0.0108296	0.0653894	-0.0125072	-0.0411906	-0.0306048	0.0085978
TCGA-CG-4469-01	-0.0093513	0.0544316	-0.0780356	-0.0192521	-0.010509	-0.0052048	-0.0672282	-0.0141359	-0.00446594	-0.056324	-0.016096	-0.00132797	0.0700479	-0.0775895	-0.00300035	-0.0476645	0.0466783	-0.0568687	-0.0300789	-0.0720077	0.00578901	0.0392825	0.0212832
TCGA-RD-A7BT-01	0.0497855	0.0588575	0.0411688	-0.0467732	0.308478	0.065263	-0.0637939	-0.0262264	-0.0203346	0.0435851	-0.0520348	0.0973537	0.0133371	0.00536593	-0.0420859	0.0530956	0.0948099	-0.0625534	0.0867325	0.0408818	-0.0551821	0.0461704	0.103132
TCGA-VQ-A91Q-01	-0.0102492	-0.0159162	-0.0782443	-0.018587	-0.00999251	0.0322157	0.0229845	0.0204715	0.0287029	-0.032677	-0.0451597	-0.0462957	0.0307438	-0.0274962	-0.0165965	-0.0310899	-0.0809581	0.0311714	-0.0512056	-0.033531	-0.0493077	-0.00254886	-0.0761122
TCGA-IN-A7NU-01	-0.0424966	-0.0683434	0.0749925	-0.0106771	-0.00043191	0.0300525	-0.00735306	0.0881721	-0.0114803	-0.0298766	-0.0329747	0.017365	0.00226984	-0.0359152	0.0280482	-0.00711721	0.0486152	0.00792899	-0.0393847	-0.0522893	0.00547738	0.00306419	0.0711798
TCGA-FP-A4BF-01	-0.0415622	-0.0327462	0.0367202	0.0205374	-0.0280059	-0.0273582	0.0109425	-0.015079	-0.0314095	-0.0070876	0.0616793	-0.0293138	0.0684453	-0.0491887	0.0779519	-0.025013	0.0421686	0.0878413	-0.0270667	0.0426875	0.119634	-0.0212954	0.0666672
TCGA-D7-A6EX-01	0.00720205	0.00569072	0.0498918	-0.0340346	-0.0230823	-0.00562284	-0.0263905	-0.0239238	-0.0678212	0.0316899	-0.0546129	0.0799412	0.0410256	-0.0011319	-0.0776458	0.0143823	0.123902	-0.0268058	-0.0169442	-0.0208661	-0.0680488	-0.0398172	0.0191645
TCGA-RD-A8MV-01	0.0290362	-0.0314653	0.00138194	0.0303881	-0.0211264	0.00744849	-0.00160584	-0.00581608	0.0201382	-0.0179174	0.0542863	-0.0264107	0.0219723	-0.0288973	0.0934524	-0.0258129	-0.0175902	-0.0382319	0.0205742	-0.0333721	0.0357907	0.0191851	-0.00427903
TCGA-VQ-A91X-01	0.0316168	0.0181678	0.00128362	-0.0474026	0.534463	-0.00862685	-0.065987	-0.0234281	-0.0484938	0.0166852	-0.0689531	0.00769417	0.0781426	-0.0592381	-0.0494374	0.00333504	0.073542	-0.0787791	0.00965156	-0.0434121	-0.0778764	0.0414634	0.0418563
TCGA-VQ-A8E0-01	0.0164329	0.00892828	0.0108924	-0.00556388	-0.00470081	0.299745	-0.0340732	-0.0211292	0.00943685	0.00476674	-0.032103	-0.0362814	-0.0172882	0.0311308	-0.000127151	0.0371621	-0.0651814	-0.0467483	0.0302987	-0.0260492	-0.00733001	0.0687295	0.0342902
TCGA-MX-A5UJ-01	-0.0426675	-0.0106296	0.027664	-0.0259663	-0.0170583	-0.0215901	0.0142575	-0.0147186	0.0178321	0.0309679	-0.03064	-0.0196607	-0.0156767	0.0207531	-0.0150071	0.002674	0.0265005	-0.00174399	-0.0121682	0.00337071	-0.032977	-0.0189478	0.0138633
TCGA-D7-8575-01	-0.00522907	-0.0429553	-0.0917165	0.0228166	-0.0154778	0.148469	-0.0154622	0.0347844	0.107174	-0.0376248	0.0140623	-0.0719978	-0.0404418	-0.02056	9.64423e-07	-0.0820917	-0.04609	-0.0300316	-0.0192345	-0.0370193	0.0300215	0.0255603	-0.0957016
TCGA-RD-A8N1-01	0.00598065	-0.0196313	-0.0302225	0.047182	-0.0251075	-0.0180583	0.0234532	-0.0242447	0.00134154	0.00478117	0.0728246	-0.0302014	0.0313634	-0.0157881	0.00235105	-0.041815	-0.0450466	-0.00899806	0.0121998	-0.0441082	0.0337129	0.00409333	-0.0486789
TCGA-BR-6802-01	-0.0357071	-0.00857174	0.0343018	0.0202144	-0.0136385	-0.0108652	-0.0141988	0.0599258	-0.00468387	0.0347712	0.00674536	-0.0258295	-0.0696581	0.0753514	0.157547	0.0242214	-0.0393434	-0.00596302	-0.013902	0.0123744	0.0244087	0.0401277	-0.0220257
TCGA-VQ-A94T-01	0.0229984	0.0644301	-0.0243508	-0.0348	-0.0248451	0.00745226	-0.0537792	0.0032576	0.00411066	0.00668374	-0.067587	-0.00307411	0.0208287	0.0196988	-0.0716994	0.0215358	0.0434594	-0.0366373	-0.0185507	0.0242471	-0.0675195	0.0340853	-0.00955932
TCGA-RD-A8N0-01	-0.0778696	-0.0616963	-0.0472839	0.0388995	-0.0301294	-0.0458391	0.0333994	-0.0413552	0.0799631	-0.0912442	0.127586	-0.0782697	0.0404001	-0.0870855	-0.0285278	-0.091217	0.0115828	-0.0207986	-0.0544241	-0.0745714	-0.00179272	-0.0251646	-0.0246281
TCGA-R5-A805-01	-0.0621831	-0.0522371	-0.0473026	0.00906114	-0.0210753	-0.0398074	-0.00243509	-0.00219925	0.17472	-0.0778973	0.00523988	-0.0552277	-0.0362282	-0.0691451	0.0186993	-0.068296	-0.0604389	-0.0131483	-0.0412709	-0.0615755	0.0312102	0.014905	-0.0362851
TCGA-BR-6564-01	-0.0519565	-0.118464	0.0579898	-0.0166353	-0.0276106	0.0370072	0.136119	-0.0343149	-0.0213271	-0.0343699	-0.00192874	-0.03073	-0.105606	0.0127694	0.0136404	-0.0326868	-0.00171319	0.0644644	-0.0140867	0.00439247	0.00367354	-0.171947	-0.0508573
TCGA-RD-A8MW-01	-0.0164326	-0.0256303	0.0416195	0.0142085	-0.0256136	0.272871	0.00548548	-0.0187362	-0.0432912	-0.0384913	0.0379001	-0.000181333	0.0341595	-0.0158044	-0.014629	-0.0025383	0.0149589	0.0583708	0.00196825	-0.00934542	0.0724685	-0.0178843	0.0555458
TCGA-D7-5578-01	0.0234314	0.00512729	0.0971184	0.0101455	0.00327832	0.0272072	0.0387029	-0.00668613	-0.00450632	0.171881	0.010095	0.062609	-0.0802574	0.23942	-0.00493597	0.102385	0.0316758	0.0138788	0.00109433	0.0845544	0.0134489	0.0307743	0.0227604
TCGA-D7-A6EZ-01	0.0453403	0.0626922	0.0365867	0.00476658	-0.019353	-0.00691551	-0.0283783	-0.0324807	-0.0464541	-0.00507392	0.0109265	-0.000949258	0.00206644	0.0351059	0.106701	0.120686	-0.00697586	-0.0157184	0.0142218	0.0305747	0.0817449	0.0240852	0.0402488
TCGA-RD-A7BS-01	-0.0783353	-0.0681671	0.0352388	-0.0140296	-0.0199699	-0.0256392	0.0116524	0.130224	0.0564078	-0.065212	0.0019626	-0.055546	-0.0416342	-0.0537625	0.0244433	-0.0412252	0.0427774	0.000256986	-0.040264	-0.00538626	-0.0161525	-0.0111283	0.0408268
TCGA-BR-8381-01	0.00547762	0.0358843	0.00478636	0.0353067	-0.0192779	0.00698461	0.0084218	-0.0219266	-0.0319943	0.00482164	0.0950305	0.00388244	0.0320632	0.0125797	0.0590136	-0.000215448	0.0561081	0.0320491	-0.0120796	-0.00332331	0.0865041	-0.00964287	0.0122633
TCGA-CD-8535-01	0.136781	0.0773244	-0.0261191	-0.0179734	-0.0108445	-0.00573143	-0.0361782	0.0191609	-0.0389344	0.0198265	-0.0584687	0.160607	0.011171	-0.0236806	-0.033123	0.0725874	0.00320419	-0.00970919	-0.0248781	0.0934716	-0.0462653	-0.01333	-0.00935136
TCGA-HU-A4GD-01	-0.0117733	-0.0122877	0.011858	-0.0523373	0.00773005	-0.038116	-0.0586563	-0.0336677	-0.0344847	0.0371568	-0.0610779	0.0140731	0.156701	-0.0529496	-0.0400992	-0.0289324	0.0254982	-0.0730431	-0.0548896	0.0170092	-0.0743777	0.0243902	0.052749
TCGA-CG-5734-01	-0.0591905	-0.0999289	0.0959848	0.0155969	-0.0241945	-0.0218458	0.0190677	-0.000687869	0.256397	-0.0131411	0.0479902	-0.0101915	-0.106028	0.0283575	0.0294566	-0.0143683	0.00351787	-0.0276235	-0.0211395	0.0142066	0.0637583	0.0410922	0.0147859
TCGA-HU-A4GU-01	0.0416028	0.0748604	-0.0300637	-0.0221708	-0.00212308	-0.039345	-0.0639574	0.0141024	-0.0490648	0.0138422	-0.0453534	0.0552957	0.0335201	0.00910652	-0.0120938	0.0673685	-0.0375898	-0.0425319	-0.0419555	-0.0568262	-0.0480641	0.0530469	-0.0062654
TCGA-RD-A8N4-01	-0.0779482	-0.100016	-0.0374107	-0.0356917	-0.0377267	-0.056225	0.0527435	-0.0606802	-0.0413252	-0.0853752	-0.00883316	-0.061554	-0.0341398	-0.0819892	-0.043548	-0.103741	-0.0338997	-0.0148831	-0.0530752	-0.0711885	-0.0399396	-0.220754	-0.0508637
TCGA-CG-4475-01	0.0111371	0.0119593	-0.0689935	-0.0223947	-0.0137978	-0.0498932	0.00464444	-0.0117051	-0.00378494	-0.0642763	-0.0287371	-0.0293644	-0.0138378	-0.0667675	-0.0511982	-0.019249	-0.0574775	0.0633174	-0.0290205	-0.00892328	-0.00671806	-0.000615465	0.0279765
TCGA-BR-6455-01	0.0602069	0.0912506	0.0324756	0.0258644	-0.0134626	-0.0132096	-0.000358589	-0.0233695	0.0268205	0.0914201	0.0221013	0.0726295	-0.0216933	0.117174	-0.000454967	0.0976584	0.0376331	-0.0221785	0.0403642	0.0568052	0.0207729	0.0217266	-0.0021689
TCGA-VQ-A923-01	0.03867	0.00203936	-0.0578259	0.0443327	-0.00181691	0.00874756	0.0230496	-0.0188818	0.0193082	-0.0337223	0.0767089	0.00286909	0.103635	-0.0276914	0.0800323	-0.0399772	-0.0675659	-0.0309242	-0.0237985	0.0419019	0.0294772	0.0170632	-0.0602076
TCGA-CD-8525-01	-0.00714261	-0.0119653	0.0985428	-0.00420786	-0.0102994	0.00537545	0.0134786	-0.0164372	-0.0241016	0.00360247	0.00685118	-0.00215012	0.0765895	-0.0275963	0.061497	0.0279132	0.0651608	-0.00792954	0.00411872	0.0219083	0.0029972	-0.00209386	0.126992
TCGA-VQ-A8PC-01	0.0272373	-0.014239	-0.0675178	0.0191393	0.0315619	-0.0219153	-0.000809235	0.000459757	0.0428313	-0.0313969	0.015556	-0.00375823	0.0277409	-0.0297713	0.0611301	-0.049574	-0.0601978	-0.0155003	-0.0272874	-0.018242	0.0145424	0.0187806	-0.0434383
TCGA-BR-4253-01	-0.0513095	0.107827	-0.0660893	0.0621884	-0.0252983	-0.0421727	-0.0599882	-0.0259268	-0.0284279	-0.0943938	0.134321	-0.0486775	0.0456558	-0.0570902	0.213688	-0.0257349	0.0157691	-0.0404466	-0.027988	-0.0301846	0.246951	0.0279947	0.0499388
TCGA-BR-6563-01	-0.068033	-0.092397	0.0429432	0.0232425	-0.0269028	-0.0393803	0.107886	-0.0391633	0.0306686	-0.0567175	0.0879679	-0.0252136	-0.0674527	-0.0319725	-0.0278445	-0.059399	0.0843575	0.0752841	-0.0354144	-0.0394721	0.05689	-0.0517127	-0.00952869
TCGA-HU-A4G8-01	-0.0361749	0.0988896	-0.0327445	-0.00337261	-0.015257	-0.0291721	-0.0676951	-0.00640087	-0.0371706	-0.0116454	-0.00753975	-0.0524229	0.0562687	0.00565651	0.112067	0.0123411	0.00745193	-0.0474334	-0.00655678	-0.0199531	-0.0100104	0.0452344	0.0208086
TCGA-HU-A4G2-01	-0.0513082	0.00606362	0.0101699	-0.0365646	-0.0235107	-0.0256309	-0.00311484	-0.0349259	0.167619	-0.0630989	-0.0144688	-0.0212387	0.0363845	-0.065642	-0.0160622	-0.0239323	0.126456	-0.053617	-0.0405057	0.0286773	-0.0217441	0.0354397	0.0915591
TCGA-MX-A5UG-01	-0.0323307	-0.0539279	-0.0808783	0.0651185	-0.0153807	-0.0465896	0.126383	-0.0165842	-0.0103061	-0.0587901	0.0868556	-0.0619658	-0.0318925	-0.0497526	-0.0258819	-0.0889647	-0.0553469	0.107733	-0.0415134	-0.0444703	0.0182046	-0.0738183	-0.100454
TCGA-BR-7722-01	-0.0313143	-0.0888219	0.044408	-0.0154836	-0.0152976	0.000925355	0.0328022	-0.00200522	0.109839	-0.0428245	-0.0101068	0.0127711	0.0418089	0.00416206	-0.0100452	-0.0345423	0.00753952	-0.0206537	-0.0160535	0.00776222	-0.0106055	0.0214032	-0.0114525
TCGA-IN-A7NT-01	0.0145689	0.054367	0.0247065	-0.00707172	-0.0114236	0.0645761	-0.037218	0.14371	-0.0556894	0.000946101	-0.0431195	0.00777963	0.028955	0.018626	0.00815611	0.0563332	-0.00951938	0.049421	0.0282041	-0.0125188	-0.0240931	-0.0315489	0.0736579
TCGA-FP-8210-01	-0.0496674	-0.0644457	-0.0292767	0.0537353	-0.0255363	-0.0393377	0.143885	-0.032098	-0.0183816	-0.0642695	0.108356	-0.0529076	-0.0466384	-0.0402606	-0.0141639	-0.0702885	-0.00253598	0.0845615	-0.0343659	-0.0436542	0.0382902	-0.102163	-0.0639837
TCGA-IN-7806-01	0.0485581	-0.00573139	0.00680923	-0.0171061	0.0105808	0.00720571	-0.0156154	0.0236926	-0.021921	0.0555945	-0.0349462	0.0692869	0.0156548	0.0533346	-0.0280837	0.0321809	0.0301111	-0.0502417	0.0123595	0.0400909	-0.0575524	0.0242054	-0.043263
TCGA-CD-8526-01	0.111887	0.0848332	0.0140844	-0.00389313	-0.0110979	-0.00505187	0.0238351	-0.0162054	-0.0436905	0.118786	0.000130295	0.108652	0.0693083	0.0526228	-0.00710846	0.0919498	-0.0293879	0.0121664	0.0390227	0.263115	-0.0168792	-0.0141479	0.0122353
TCGA-CD-A487-01	-0.0146646	-0.00269335	0.0506513	-0.0430059	-0.0162928	-0.0297282	-0.0210265	-0.0244783	-0.0382864	-0.0397002	-0.0461055	0.0170354	0.117061	-0.0479276	0.000587342	0.0186047	0.0580138	0.00817009	-0.00777455	0.0327237	-0.0478281	-0.0297986	0.0998826
TCGA-D7-A4YX-01	0.0253566	0.0800353	-0.0122489	-0.00559101	0.0599096	0.0335717	-0.0491921	0.00781017	-0.0483055	0.0152613	-0.00676839	0.0239178	0.0392718	0.0257849	0.11023	0.0558461	0.0484251	-0.0516556	0.00175238	-0.00944749	0.021854	0.0417	0.00492595
TCGA-CD-A48C-01	-0.00147035	-0.0157957	0.0600431	-0.0312014	-0.0280207	0.0615101	-0.0289868	0.00744531	0.00915167	-0.00965722	-0.0396476	-0.0132698	0.0361583	-0.0401678	-0.0389742	-0.0142493	0.056668	0.0155882	-0.00814873	0.0308409	-0.0343137	0.01641	0.101992
TCGA-RD-A8NB-01	-0.0343709	0.0262317	-0.0469847	0.0065265	-0.0166129	-0.0351476	-0.000223377	-0.00257978	-0.0300569	-0.00810024	0.0184345	-0.0544033	0.00471757	-0.0167699	0.084391	-0.0197723	-0.0474004	-0.0046135	-0.0272087	-0.031311	0.00972939	-0.0166551	-0.0307295
TCGA-IN-A6RR-01	-0.0389621	-0.0392082	0.0562216	-0.0309056	0.00120385	-0.00747538	-0.0287162	0.0176905	0.161665	-0.0184053	-0.0296939	-0.00293328	0.0439066	-0.024908	-0.0315928	-0.00149869	0.0511079	-0.0622029	0.0259566	0.0269405	-0.0510823	0.0519504	0.0903505
TCGA-BR-6458-01	0.0661133	0.00520004	-0.00452714	0.0226669	-0.0217966	0.0414473	0.0327625	-0.0116128	-0.000233787	0.0949005	0.0181155	0.096096	-0.0438647	0.0401235	0.00482776	0.00249683	-0.0537429	0.0772908	0.00964238	0.0895698	0.0636316	-0.00550105	-0.0522499
TCGA-CD-8531-01	-0.0377226	0.055546	0.0444694	0.775753	-0.0270948	-0.0171094	-0.00394616	-0.0472571	-0.058143	-0.0280908	0.077325	-0.04524	-0.0113955	0.0486782	-0.04884	0.0240878	0.0607091	-0.00724331	-0.000288358	0.0265046	0.0663995	-0.0469057	0.0235516
TCGA-CD-5801-01	-0.0241756	-0.0457332	0.132413	0.018328	-0.00437484	0.0869918	-0.00801903	-0.00155337	0.0231302	0.00515253	0.0499285	0.0357347	-0.0363238	0.105238	0.0749047	0.055439	0.0694147	-0.0309659	0.00453441	0.0943162	0.106881	0.0285668	0.0622809
TCGA-D7-A747-01	-0.0714466	-0.0959528	-0.0301183	-0.0183549	-0.0340075	-0.0422412	0.0370392	-0.0578926	-0.0434637	-0.0804407	0.00381334	-0.0507456	-0.0389359	-0.0876997	-0.0514427	-0.0954119	-0.00120384	0.00373844	-0.0567083	-0.0786364	-0.0295918	-0.178742	-0.0283919
TCGA-D7-6521-01	-0.025166	-0.0674794	0.0600357	0.0119932	-0.0244935	0.144168	0.0526975	-0.0269168	-0.00985481	-0.0144615	0.0296267	0.011304	-0.0820571	0.0904197	-0.0375335	-0.0112105	-0.0273261	0.0536124	-0.0317883	0.0642844	0.0526557	0.00129922	-0.0174938
TCGA-CG-4444-01	0.00116538	0.0598615	-0.0590865	-0.00416551	-0.000356369	-0.0373222	-0.0369938	-0.0257439	-0.00184923	-0.0624566	0.0162629	-0.027521	0.0269273	-0.0351136	-0.0284393	-0.0225676	0.0134674	-0.0177757	-0.0239318	-0.0281619	0.000809044	0.0265479	0.00501615
TCGA-D7-6520-01	0.0707465	-0.0435647	0.0631128	-0.00392297	-0.00905781	0.0339976	0.0389937	0.027441	-0.0148056	0.125547	-0.0151108	0.0634386	-0.102303	0.0741744	0.0667869	0.0220928	-0.0967805	0.0590569	0.00048983	0.108607	0.0305018	0.0117096	-0.0189472
TCGA-KB-A93J-01	0.0156278	-0.0115856	-0.00206782	0.0236474	-0.0031026	0.0140506	-0.0291681	0.00168628	0.084062	0.0028685	0.0273891	0.0116925	0.000875592	0.0753855	0.0430944	0.00701567	-0.100182	-0.0412702	0.0461271	0.0539478	0.0813062	0.0674025	-0.00272874
TCGA-CG-5717-01	-0.0585886	-0.0616666	-0.0109039	-0.00901637	-0.0199505	-0.0392597	0.00609365	0.436706	-0.0349959	-0.0516989	-0.00665288	-0.0400673	-0.0829211	-0.00826943	-0.0071965	-0.046337	-0.0327487	-0.0362678	-0.0275539	-0.0317724	-0.0272077	-0.0164305	-0.0513406
TCGA-CG-4305-01	-0.0172126	0.0243607	-0.050176	0.0125606	-0.0201146	-0.00330155	-0.0384063	0.00902813	-0.00966751	-0.0258943	0.0236289	-0.0105552	0.00392473	-0.045639	-0.0256958	-0.0246052	-0.0244845	0.0221006	-0.01938	-0.0558065	0.0653357	0.02467	-0.0020024
TCGA-BR-4279-01	-0.0879448	-0.0258653	-0.0464008	-0.00634971	-0.0376377	-0.0523353	0.0496198	-0.0336824	0.064498	-0.119204	0.0470898	-0.0588439	-0.0797857	-0.111059	-0.034185	-0.0674388	0.0746332	0.0930069	-0.039516	-0.0950939	0.0937365	-0.0456707	0.052591
TCGA-D7-8574-01	-0.0396291	-0.0681813	-0.0408491	0.0944825	-0.0114063	-0.0303089	0.102291	-0.049845	-0.0309254	-0.0682037	0.172051	-0.0497864	-0.000703339	-0.0485764	-0.0123094	-0.0817881	0.00906845	0.0735725	-0.0382223	-0.0495734	0.0390405	-0.062477	-0.0764373
TCGA-D7-6818-01	0.0204035	-0.0350633	0.0612887	0.0274268	-0.011449	-0.0211749	0.0743728	-0.0326277	-0.0276671	0.0343517	0.00319763	0.0591441	-0.103325	0.0800379	-0.0188194	0.0320146	-0.0432739	0.0944685	0.0455628	0.0964557	0.0730847	-0.0270823	-0.0369025
TCGA-BR-8060-01	0.0381408	0.0354001	-0.0351776	0.00517875	-0.0193886	-0.0226537	0.0543895	-0.0481569	-0.0399129	0.0151319	0.00623627	0.0276248	-0.0210127	0.0056751	-0.0302626	0.00934666	-0.0430968	0.0242179	0.0536529	-0.0187233	0.0242137	-0.0546681	-0.0341538
TCGA-RD-A8N6-01	0.0686859	-0.0216271	-0.0281562	-0.0329545	-0.00278345	-0.0371828	-0.00197624	-0.0320752	-0.0421655	-0.00705211	-0.0316037	0.0519166	0.0761737	-0.0427485	-0.0334163	-0.0445019	0.0103338	-0.0168879	-0.0201863	-0.0204385	-0.0430528	-0.0522282	-0.00327349
TCGA-HU-A4HB-01	-0.0259177	-0.0234368	-0.0150869	0.0839618	-0.0111141	-0.0159299	-0.0102602	-0.0268968	0.0971862	-0.0273035	0.115772	-0.0462223	0.0220302	-0.0400338	0.0269966	-0.0464576	-0.00296292	-0.0469773	-0.0260523	-0.0430017	0.0221553	0.0245465	0.00326906
TCGA-D7-A6EV-01	0.0668214	0.0849223	0.01759	-0.0187644	0.0111689	0.192943	-0.0737894	0.0384568	0.0116683	0.129369	-0.053408	0.0265415	0.0318239	0.0479666	-0.0366714	0.0743045	-0.0285753	-0.0501735	-0.00424495	0.0050891	-0.0599898	0.0670884	0.0405058
TCGA-D7-6525-01	0.0316547	0.00242879	0.0569856	-0.013091	0.00285309	0.0605172	-0.00141495	0.095372	-0.0456472	0.102627	-0.0248997	0.0951476	-0.0759322	0.0690493	0.0737678	0.114012	0.00868465	0.0644853	0.0287291	0.0753759	0.0118787	0.00895172	-0.0213244
TCGA-D7-A4Z0-01	-0.0687578	-0.064001	-0.0308713	0.00107428	-0.0250939	-0.0408917	0.0364109	0.0138119	0.0749742	-0.0574922	0.00313412	-0.072499	-0.0107541	-0.0492383	-0.0369705	-0.073087	-0.0504262	-0.00966527	-0.0474302	-0.0612273	-0.025741	0.00192896	-0.024587
TCGA-HU-A4H4-01	5.11074e-05	0.0437676	0.0254835	-0.0066901	-0.0204752	-0.0278352	-0.0299466	-0.0137618	-0.0443086	0.00485189	0.0106926	0.0680787	0.0750841	0.000182917	0.103848	0.0487786	0.0344949	-0.0481018	0.0413023	-0.031794	0.0144509	0.0442358	0.0633428
TCGA-IN-8663-01	0.0203393	0.0448393	-0.0914098	-0.0115017	-0.023408	0.05653	-0.0433763	0.311091	-0.0643718	0.020992	-0.0425349	-0.0335136	0.040333	-0.0446389	-0.0070868	-0.0271631	-0.0732559	-0.000518746	-0.0072335	-0.0221173	-0.0592345	-0.0178924	-0.0683567
TCGA-BR-6453-01	-0.0521401	-0.0654894	0.0923674	0.0837184	-0.0185689	-0.0193489	0.0906879	-0.0353224	0.00766123	0.0298188	0.164747	0.0037707	-0.0604237	0.0270066	-0.0260002	0.00724271	0.0869245	0.0109487	-0.0036537	0.00859206	0.0646266	-0.0139612	0.0137022
TCGA-RD-A8N9-01	-0.0273681	-0.038423	-0.0478993	-0.0010596	-0.0260905	-0.0453873	0.0974247	-0.037876	-0.00869851	-0.0467192	0.0228278	-0.0375026	0.0162261	-0.0662716	-0.0208656	-0.0606433	-0.0249885	0.0909606	-0.0306546	-0.0107248	0.015392	-0.0499593	-0.0340461
TCGA-CD-5799-01	-0.0164824	-0.00550749	0.114458	-0.0347675	0.116676	0.0892868	-0.0201384	-0.00088186	-0.0169968	0.0726735	-0.053729	0.062058	-0.0536869	0.116423	-0.0176782	0.0875957	0.023897	-0.00376885	0.0419255	0.0588247	-0.0420091	0.0526863	0.0998812
TCGA-CG-5723-01	-0.0683345	-0.00115036	0.114208	-0.00349133	-0.023044	0.00581312	-0.0309613	0.0145147	-0.0403576	-0.0146425	0.0187441	-0.0149811	-0.0602345	0.0374653	0.147359	0.0570743	0.0861845	-0.00242092	-0.00279112	0.0336724	0.137829	0.00877723	0.137564
TCGA-D7-6524-01	-0.0386338	-0.0438267	0.00939849	0.0204065	-0.0190855	-0.0225892	0.104085	0.0283477	0.0186638	0.0046877	0.0120853	-0.0358037	-0.0751742	0.027019	-0.0161364	-0.0212907	-0.0460484	0.129629	-0.0152545	-0.00478123	0.0193607	-0.0177667	-0.0510664
TCGA-D7-6519-01	-0.00573346	-0.0156564	0.113555	-0.00791158	-0.00953051	0.0567278	-0.0170112	0.0581639	0.00671288	0.0477142	-0.0358316	-0.0198104	-0.0513261	0.13543	-0.00614866	0.0262117	0.0204304	0.0135144	-0.023202	0.0934677	-0.0236695	0.0173276	0.0180096
TCGA-VQ-A91E-01	0.00633287	0.0296611	-0.0472114	-0.000590769	-0.0131216	-0.0059796	-0.0699063	0.0108189	0.063821	0.0130168	-0.0143424	-0.0290173	0.000165444	0.00714298	0.00709176	-0.0105999	-0.0664627	-0.0616707	-0.0276214	-0.0258732	-0.0365668	0.066738	-0.0333784
TCGA-BR-7958-01	0.00200074	0.0109976	0.0145372	0.0454589	-0.0194589	0.00624131	0.0223812	-0.00138057	-0.0257632	-0.0141959	0.0896488	0.0129221	-0.0151099	0.0283144	0.150515	0.0150801	-0.00561245	0.0214942	-0.00972491	0.0705042	0.139304	-0.00367507	-0.0165954
TCGA-BR-8295-01	0.0381349	0.0976332	0.0384772	-0.0424698	-0.0187762	0.0132471	-0.0315011	-0.0408783	-0.0138426	0.0933254	-0.0604027	0.0354441	0.0433154	0.057968	-0.0812768	0.16169	0.0258756	-0.0213966	0.0194096	0.120158	-0.0574955	-0.00434361	0.075887
TCGA-HU-8602-01	-0.0139689	0.156677	-0.0535787	0.0300343	-0.0133447	-0.0260768	-0.0622831	0.0275216	-0.0563675	0.0425141	0.0140056	-0.0413709	-0.00497321	0.0506041	0.143816	0.0444844	-0.0042491	-0.017345	-0.00517708	0.0208081	0.0493393	0.0208584	-0.0407404
TCGA-BR-7851-01	-0.00538134	0.0667854	-0.0197452	0.00127467	-0.00836194	-0.0187739	-0.0307789	0.0126657	-0.0301879	0.00280363	-0.0178743	-0.0284172	-0.0299324	0.0539104	-0.0391106	0.0335921	-0.0373773	0.00254666	-0.0092131	-0.0035422	-0.011881	0.0237157	-0.0391864
TCGA-BR-8682-01	0.0227129	-0.0478643	-0.0882764	-0.00256236	0.00855427	-0.0157234	0.0436345	-0.0102267	0.0484337	-0.0323862	-0.0096634	-0.052963	-0.0153493	-0.0387366	-0.0355034	-0.06596	-0.0580839	0.00363631	-0.0387053	-0.0602976	-0.0124191	-0.0449236	-0.0934232
TCGA-VQ-A94U-01	-0.0163658	-0.00873985	-0.025488	-0.0241967	-0.0239629	-0.034261	0.0559336	-0.0239672	-0.0253426	0.0135156	-0.0279307	-0.0241873	0.102447	0.00130767	-0.028768	-0.0445467	-0.0120201	-0.00487392	-0.00927101	0.0233489	-0.0468781	-0.0116147	-0.0274163
TCGA-VQ-A8PO-01	-0.0335455	0.0597795	0.0199327	0.0121361	0.00489479	-0.0167484	-0.0505047	0.00743617	-0.0236212	0.0729353	0.00694381	-0.032371	0.0318529	0.0603195	0.064021	0.0508996	-0.00191712	-0.0169381	-0.0101674	0.0167774	-0.00125335	0.0429027	0.0107864
TCGA-BR-8588-01	-0.0588963	-0.0132848	-0.00640075	-0.00599624	-0.0190616	-0.0357518	0.016317	-0.0277298	-0.023769	-0.034806	0.00588022	-0.0510716	-0.0139718	-0.0416517	-0.00859927	-0.0197886	0.0210184	0.0189388	-0.0351924	-0.046266	-0.00236574	-0.0134798	0.00998449
TCGA-BR-4361-01	-0.0534979	0.0874832	-0.0623807	0.0016697	-0.0303873	-0.0360096	-0.0566931	-0.0284206	-0.0243549	-0.0520404	0.00909687	-0.0501987	0.0710078	-0.0680374	0.0421952	-0.0219354	-0.00544257	0.0400318	-0.0378992	-0.0665288	0.0641529	0.0197955	0.0495734
TCGA-CD-8528-01	-0.00740396	0.0996316	-0.023888	-0.0249157	-0.032516	0.00787621	-0.0698625	-0.00142635	-0.0106686	0.0558515	-0.0516244	-0.0224897	-0.021119	0.0597892	-0.0542051	0.0454382	0.000532385	-0.00929876	-0.0284942	-0.00270893	-0.0383567	0.0335599	-0.0331387
TCGA-BR-6852-01	-0.0169103	0.00699337	0.0487846	0.0536031	-0.00479384	-0.0116647	-0.00835939	0.0287573	-0.0553785	0.0682443	0.0660919	-0.0103175	-0.0600028	0.0951447	0.204752	0.0516214	-0.0354019	0.026902	-0.000566134	0.0380464	0.119984	0.0252301	-0.0125586
TCGA-VQ-A8E3-01	0.00561574	0.065639	-0.0279218	0.00250978	-0.0101002	0.0447709	-0.0422409	-0.00645996	-0.0509951	0.00206489	-0.00210179	0.0663957	0.0400341	0.0467623	0.147238	0.00253114	0.018193	-0.0541829	-0.0241936	-0.0142963	-0.00392367	0.0269837	-0.00991143
TCGA-VQ-A8P5-01	-0.0194344	0.0464655	-0.00160478	-0.0265848	0.0989006	-0.00143997	-0.0348678	-0.00356586	-0.0357759	0.0655202	-0.0437649	-0.016143	0.0179062	-0.023409	0.00431616	0.0638392	-0.0263532	0.0124927	0.0224173	0.0731925	-0.0240685	0.0222428	0.0359732
TCGA-BR-6454-01	0.120666	-0.0185815	0.0334468	0.0399873	-0.0034658	0.228809	0.0126661	-0.00840268	-0.00858708	0.029564	0.0603373	0.0158121	-0.0567494	0.0423119	0.0844429	0.0340049	-0.0530223	-0.00856084	0.0227741	0.0919366	0.0308146	0.0282232	-0.0242455
TCGA-CD-8534-01	-0.0324661	-0.0448598	-0.0155276	-0.0281043	-0.0222995	0.20028	0.0117832	-0.039555	-0.0100562	-0.0593326	-0.0130177	-0.0395623	-0.00835042	-0.0438363	-0.00642418	-0.0521425	0.0446387	-0.050023	-0.0274512	-0.0244509	-0.0340805	-0.0110085	-0.0210876
TCGA-BR-8365-01	-0.0577739	-0.076998	-0.0428421	-0.0107378	-0.02959	-0.0253345	0.119496	-0.0407795	-0.0275533	-0.0802158	0.0190726	-0.0557494	-0.06604	-0.0557811	-0.0405868	-0.0797589	-0.00501175	0.0499325	-0.03651	-0.0516656	-0.00555457	-0.168766	-0.0630404
TCGA-BR-6707-01	-0.00599555	0.0287749	0.0901526	-0.00447527	-0.0185578	0.00496276	-0.00324687	-0.0420785	0.00306621	0.0511403	0.030127	0.0484833	0.0208351	0.0865622	0.0456539	0.112159	0.147613	-0.0323385	0.0195267	0.0587281	0.0402123	0.0181389	0.0845977
TCGA-BR-7704-01	0.0537638	-0.00122387	0.146369	0.0305684	-0.01127	0.0481346	0.014946	-0.0201803	-0.0348414	0.0811811	0.0564234	0.230076	0.0632379	0.0812575	0.0703731	0.10768	0.0411884	-0.00764638	0.0511171	0.0581994	0.0926231	0.00234506	0.0936818
TCGA-MX-A663-01	0.0154947	-0.0342874	-0.0106306	-0.0262505	-0.0224068	-0.0165901	0.110968	-0.0255533	-0.016802	-0.00887511	-0.0257927	0.00723906	-0.0224223	-0.0218033	-0.0635682	-0.0291059	-0.0223241	0.094546	-0.0317325	-0.00525373	-0.025854	-0.0729245	-0.0448196
TCGA-BR-6452-01	-0.00307717	0.062537	-0.00779366	0.0111294	-0.0185288	-0.0121649	-0.0451834	0.0136966	0.0157158	0.0635847	0.00624553	-0.0135122	-0.0658327	0.0857154	-0.00556897	0.054037	-0.0503089	0.00692431	-0.000302972	0.0247718	0.0143457	0.0523145	-0.0231463
TCGA-D7-8573-01	0.0492949	0.0747301	-0.00719345	-0.0160587	0.151549	0.01043	-0.0491991	0.031714	-0.0460279	-0.0137301	-0.0500426	0.0355825	0.0205166	0.0370706	-0.0324205	0.0530751	0.0206338	-0.0563913	-0.00426572	0.00645654	-0.0508205	0.0260981	-0.0144898
TCGA-BR-A44T-01	-0.087937	-0.089576	-0.00088959	0.0808117	-0.0330998	-0.0428582	0.0343752	-0.0616885	-0.0491799	-0.0892125	0.191833	-0.0605913	0.0421208	-0.0767228	-0.0393879	-0.091042	0.0773444	-0.0241572	-0.0469197	-0.0586702	0.0168359	-0.124525	-0.0104863
TCGA-BR-8487-01	-0.0672644	-0.00926646	0.0605458	-0.0321521	-0.0161814	0.0152844	-0.0644666	-0.0223984	-0.0258434	-0.0152168	-0.0263405	-0.0237598	0.0211966	-0.000818605	-0.00845709	0.0153076	0.112776	-0.0442136	-0.0242672	0.0538605	-0.00640169	0.0446327	0.0895116
TCGA-CD-5813-01	-0.023717	-0.0855278	0.0680236	0.0315769	-0.0211401	-0.00561178	0.198312	-0.0251138	-0.0400605	0.0142537	0.067402	0.014675	-0.108152	0.0156527	-0.0291953	-0.00238273	0.0474977	0.171937	0.00774804	0.13063	0.101643	-0.0533397	-0.0279188
TCGA-CD-8524-01	0.0245746	-0.0313393	0.0374249	-0.0128177	-0.0221465	0.00895669	0.0461282	0.0460223	0.000833123	0.0123339	-0.0174783	0.0305576	0.0710573	0.00349166	-0.00661499	-0.00939074	-0.0104637	0.0588051	-0.00106099	0.10248	-0.0123913	-0.00625283	0.0275145
TCGA-CD-8530-01	-0.0284475	-0.0500012	0.00277916	-0.0168443	-0.0310473	-0.00548562	0.119949	-0.032893	0.0537068	-0.0144702	-0.00589137	-0.00519355	0.0205743	-0.0367551	-0.0454161	-0.0401221	0.02503	0.0733567	-0.0326149	-0.0133713	-0.00957137	-0.0667808	-0.0108135
TCGA-BR-8286-01	-0.00937366	0.0401831	-0.00423317	-0.0146196	-0.00971764	-0.0167835	1.85364e-05	0.000476145	0.0130534	-0.00657242	-0.0209185	-0.0196251	-0.012397	-0.0249641	-0.0258315	0.0175316	0.00664955	-0.0185657	0.00641304	0.059728	-0.0112002	0.0250882	0.0183992
TCGA-HU-A4GT-01	-0.0499547	0.0819557	0.0562328	-0.0350418	-0.00837599	-0.0138316	-0.0907748	-0.011452	-0.0345911	0.0512178	-0.0422672	-0.0311426	0.0138974	0.0192949	0.00615841	0.0547652	0.114789	-0.0660155	-0.0120168	-0.0114595	-0.0510954	0.070758	0.12794
TCGA-BR-A4J9-01	-0.0915539	-0.108888	-0.0419636	-0.0384444	-0.0416177	-0.0600097	0.0635188	-0.0607468	-0.0404682	-0.106778	-0.0173475	-0.0760683	-0.0288735	-0.0990094	-0.0752418	-0.113772	0.00815698	-0.00364449	-0.0577029	-0.0787295	-0.0550793	-0.230322	-0.049571
TCGA-BR-6803-01	-0.0515465	-0.0841709	0.0273247	-0.00629196	-0.0268361	-0.0258795	0.112869	-0.0336812	-0.0129431	-0.0210149	0.0185292	-0.0278562	-0.095757	0.0123816	-0.0438253	-0.0428416	-0.0101919	0.0331979	-0.0114599	0.00251355	4.81167e-05	-0.124208	-0.0491381
TCGA-BR-6457-01	-0.0320376	-0.100447	0.0502388	-0.00571547	-0.0261072	-0.0238129	0.170154	-0.0329674	-0.0168829	0.00524722	0.0159147	0.00973872	-0.115051	0.0292508	-0.0411323	-0.0327931	-0.0125137	0.130974	0.0129601	0.0102847	0.0159075	-0.103959	-0.0559443
TCGA-CD-A489-01	-0.057158	-0.0747741	-0.0208243	-0.0185535	0.000594892	-0.0384659	0.0430698	-0.00717714	-0.0306373	-0.0731076	-0.00324884	-0.0341086	0.0128592	-0.0879193	-0.0269232	-0.0719991	0.0161161	0.030552	-0.0270339	-0.0795809	-0.0228982	-0.12188	0.0113043
TCGA-CD-5803-01	-0.0219189	-0.0451696	0.0356173	0.0706223	-0.021003	-0.0311992	0.120726	-0.0130183	-0.0254699	-0.00220739	0.132809	-0.00131896	-0.085148	0.0377024	0.109542	-0.00859598	0.0079274	0.119087	0.0186945	0.024193	0.0988291	-0.0617234	-0.0425862
TCGA-BR-8366-01	-0.0469624	-0.0246546	0.00767574	0.0547883	-0.0179774	-0.00777282	0.0284803	0.0717213	-0.0266718	-0.0536312	0.0940384	-0.0429884	-0.0405587	-0.00600227	0.0940584	-0.0206482	0.0280618	0.0460835	-0.023199	-0.0195161	0.136616	-0.0180835	0.00997352
TCGA-CD-8533-01	0.19502	0.0861205	-0.0326553	-0.0088539	-0.0163034	0.0338948	-0.0117505	-0.0245442	-0.0305424	0.088902	-0.0471446	0.14888	0.0219005	0.119252	-0.0559839	-0.00309331	-0.0369338	-0.00924776	0.0262508	0.013626	-0.0576037	-0.00395262	-0.0431704
TCGA-IN-AB1X-01	0.0127042	0.00577621	-0.0690332	0.0267964	-0.0199482	-0.0184692	-0.0249899	0.0947364	0.0680117	-0.0302487	0.0376788	-0.00866658	0.0194165	-0.00390859	0.168174	-0.0356118	-0.0522564	-0.0342164	-0.0140237	-0.0047858	-0.00587083	0.0240518	-0.0581294
TCGA-CD-A4MG-01	-0.0612774	-0.0213074	0.0583954	-0.0294782	-0.0298292	0.0117828	-0.0263186	-0.0398218	-0.0353022	-0.0191913	-0.0324044	-0.000566162	0.0585579	-0.0230536	-0.0588367	-0.00702715	0.0927272	-0.00073859	-0.0314983	-0.0264832	-0.0174697	0.0041918	0.103061
TCGA-BR-6566-01	-0.0750878	-0.0353448	0.144245	-0.0139824	-0.0138625	0.0166177	-0.0210862	-0.00550653	-0.0383301	0.0373736	-0.0189935	-0.0168347	-0.0699801	0.0731902	0.0277641	0.0715787	0.105511	0.0548682	-0.00821218	0.0511285	0.0331693	0.0270465	0.0733928
TCGA-CG-4477-01	-0.0235771	0.0521659	-0.0669484	0.0249115	-0.0218919	-0.0392285	-0.0301342	0.0374973	0.00582799	-0.0845718	0.0577744	-0.0323292	0.0348494	-0.0639341	0.0643511	-0.0229626	-0.0203312	-0.0119249	-0.00963579	-0.0757699	0.0790377	0.000465585	0.0348594
TCGA-FP-8209-01	-0.0555757	-0.0894751	-0.0816318	0.0495669	-0.0313353	-0.0564158	0.131945	-0.0501016	-0.0420613	-0.0910457	0.0956008	-0.0693673	-0.056934	-0.0689515	-0.0468929	-0.107304	-0.0523824	0.0578519	-0.0465507	-0.0692126	0.0077756	-0.205883	-0.116245
TCGA-B7-5818-01	-0.00929396	-0.0228277	0.117566	0.000794619	0.0102963	0.066472	-0.0159835	-0.0168481	-0.048335	0.0211174	-0.00118476	0.0133927	-0.0665441	0.136652	0.0185662	0.121744	0.0520038	-0.02043	0.0360182	0.0712553	0.0783538	0.0386213	0.0527749
TCGA-D7-6522-01	-0.058007	-0.0813069	0.107415	0.120181	-0.0192888	-0.0176246	0.167455	-0.0246965	-0.0290343	0.0033433	0.180986	-0.00661546	-0.111311	0.067037	0.00925742	0.0138485	0.0425989	0.16033	0.00326803	0.0355757	0.20818	-0.0460868	-0.0182397
TCGA-CG-5725-01	0.0913341	0.038698	0.087284	-0.0383642	-0.00348113	0.0832507	-0.00495795	-0.0151351	-0.0497533	0.0883645	-0.054935	0.0837444	-0.0584963	0.129692	-0.0736925	0.140325	-0.0188204	-0.0140079	0.0847253	0.0583747	-0.0461707	-0.0116986	0.0183229
TCGA-RD-A7C1-01	-0.00654761	0.0094887	0.060471	-0.0108502	-0.031141	-0.0372684	-0.0235067	-0.033617	-0.0449043	0.0199955	-0.00134674	0.0366574	-0.0149095	-0.0244209	0.00133128	0.0276297	0.0731927	-0.0480533	-0.0362178	0.00116936	0.0374724	0.0303076	0.128939
TCGA-D7-A6F2-01	0.0161201	-0.0311074	-0.0185865	-0.0114135	0.137688	-0.00662493	-0.0166122	-0.0298362	0.00441592	0.0158542	-0.0178075	0.00759354	0.00593725	0.00910958	-0.0245317	-0.0273272	-0.0431537	-0.0337916	-0.0313276	-0.0482872	-0.00930331	0.0254288	-0.0459735
TCGA-BR-8368-01	-0.0107785	0.0871506	0.0199834	-0.0111668	-0.0146437	-0.00775019	-0.0646768	-0.0141768	-0.0213643	0.05044	-0.0212957	-0.0147814	-0.0153207	0.0748991	0.000627062	0.0668668	0.00332314	-0.0597314	0.00134361	0.0417219	-0.034104	0.066993	0.0246428
TCGA-CG-5720-01	-0.0281548	-0.0106726	0.0751486	0.00550782	-0.000404464	-0.0106685	0.025178	-0.00381249	0.0410814	0.0452105	0.004518	-0.00261927	-0.0853323	0.0910276	-0.00208607	0.0632749	0.0161197	-0.0163498	0.00619259	0.0241674	0.0182124	0.0471905	0.00751941
TCGA-BR-7707-01	-0.0389538	0.0613481	0.105444	-0.0153859	-0.00655873	-0.0019434	-0.0396454	0.0544407	-0.0495112	0.0872348	-0.0335724	-0.00732398	-0.0406809	0.13802	0.0696335	0.181937	0.0620611	-0.00308956	0.0227738	0.0698438	-0.023866	0.041845	0.0645694
TCGA-CG-4442-01	-0.0519943	0.0717076	-0.0817508	-0.0437685	-0.0260215	-0.0468672	-0.0960561	0.00911197	0.000498043	-0.0586751	-0.0461564	-0.0756161	0.0256809	-0.0786636	-0.0595271	-0.0294179	0.0512713	-0.0301984	-0.0227499	-0.0799283	-0.0452946	0.0185745	0.0098342
TCGA-F1-6874-01	0.019859	0.00517379	-0.055946	0.0239458	-0.00596595	0.0130375	0.0115203	-0.0074021	0.0137982	0.000277228	-0.00089051	-0.00148327	-0.0634247	0.0366079	0.00982297	-0.0197997	-0.0757543	0.0285567	-0.0345585	-0.0184208	0.00509301	0.0489453	-0.0817455
TCGA-RD-A8N2-01	-0.102127	-0.115759	-0.0779689	-0.046816	-0.0434768	-0.0708264	0.0454073	-0.069328	-0.0491122	-0.126838	-0.0360037	-0.0962287	-0.0353643	-0.129845	-0.0857852	-0.135924	-0.040991	0.000221234	-0.0723052	-0.111467	-0.0515932	-0.258666	-0.0735482
TCGA-RD-A7BW-01	-0.0739859	-0.0924473	-0.000898007	0.00360873	-0.0325922	-0.0433713	0.0961251	-0.0305157	-0.0487492	-0.0899953	0.050346	-0.0441963	-0.0420028	-0.0797297	-0.00923982	-0.0784373	0.0329135	0.0649117	-0.0406178	-0.0354696	0.0591865	-0.147992	0.000158698
TCGA-D7-A6F0-01	0.192119	0.0801917	0.0204665	-0.0183976	0.0223757	0.0104802	-0.00308242	-0.019143	-0.0163961	0.126538	-0.019177	0.0810312	0.025181	0.0452509	-0.0206893	0.126459	-0.0329713	2.4535e-06	0.100081	0.0390432	0.024013	0.0180242	0.027076
TCGA-BR-8680-01	0.0109747	0.1128	0.00155094	-0.0229847	0.00516213	-0.00607024	-0.0950226	0.0095196	-0.0106534	0.0251574	-0.0624114	0.00453469	0.144038	0.0551749	-0.0585743	0.06567	0.0524841	-0.0325689	0.00421933	0.0142676	-0.0680772	0.028306	0.0190042
TCGA-CG-5716-01	-0.0322797	-0.0286121	0.0408063	0.0174344	-0.0148118	-0.0158612	-0.00808316	0.00701677	0.237603	0.00257776	0.0399999	-0.0263652	-0.0778848	0.0553099	-0.0434942	0.0282183	-0.025812	-0.0589746	-0.0110271	0.0113781	-0.0344824	0.0593328	-0.0109898
TCGA-R5-A7ZF-01	0.00473808	0.0800336	0.0671779	-0.046224	-0.0176777	0.0378967	-0.049321	0.0295001	-0.0388964	0.0779413	-0.0602132	0.0259654	-0.0246687	0.030383	-0.00213204	0.0816526	0.0844316	-0.0535321	0.00539359	0.020385	-0.0623062	0.0165505	0.127596
TCGA-CG-4460-01	0.00744567	0.0594816	-0.0652185	-0.0256186	-0.00843422	-0.0392471	-0.0416529	-0.0304167	0.0435304	-0.0351583	-0.0249616	-0.0430562	0.020248	-0.0771404	-0.0555768	-0.0194384	-0.0264301	-0.0382751	0.00961997	-0.0346128	-0.0232413	0.00665152	0.0215895
TCGA-VQ-A8PQ-01	-0.0135989	-0.034874	-0.079339	0.164296	-0.0135073	-0.0251477	0.0831296	-0.0264503	-0.0172673	-0.0597861	0.268024	-0.0430981	0.029468	-0.025915	0.0236692	-0.0793407	-0.0289294	0.0267122	-0.0467282	-0.0315788	0.039827	-0.0358539	-0.0940425
TCGA-R5-A7O7-01	-0.0447118	-0.0285442	0.0654518	-0.0384271	-0.0310828	0.0331939	-0.00676379	-0.0282576	-0.0394173	-0.000939761	-0.0369471	-0.0345899	-0.00811622	-0.0013552	-0.06187	-0.00685911	0.0309867	-0.0267254	0.0302578	-0.0700565	-0.047769	0.0122511	0.0849945
TCGA-VQ-A8E7-01	-0.00909277	0.0027407	-0.0466869	-0.0366902	0.116497	0.000282636	-0.02346	0.0331689	-0.00888071	0.0321651	-0.0586817	-0.0296285	-0.0108461	-0.0141076	-0.0400335	-0.00658579	-0.0483741	-0.0249047	-0.0265919	-0.0214553	-0.06778	0.0164553	-0.066774
TCGA-HU-A4GQ-01	-0.0460237	0.0136787	-0.00534951	-0.0418705	-0.0241385	-0.00808582	-0.0580533	-0.0206588	-0.0431563	-0.0320798	-0.0360607	-0.0261299	0.0256921	-0.0478262	0.0460566	-0.0265287	0.092907	-0.0171421	-0.0307668	-0.0541388	-0.0164711	-0.0107966	0.0455983
TCGA-VQ-A91D-01	-0.0362405	0.00917135	-0.00776619	-0.0211255	-0.0122165	-0.013694	-0.0488432	0.0387209	-0.0255644	-0.00587334	-0.0388316	-0.0393524	-0.00875127	0.0245475	0.0647678	0.00216023	0.065085	-0.00119898	-0.020414	-0.00937425	-0.017007	0.0181736	-0.0328403
TCGA-BR-8077-01	0.00205835	-0.0211141	0.037934	-0.0270738	0.0357982	-0.0281884	-0.00480283	-0.0445208	-0.0291554	0.0125601	-0.00660996	0.155015	0.0906215	-0.0428545	-0.00314852	-0.0141827	0.116619	-0.0286924	0.00234535	-0.0562579	0.0016284	0.00758434	0.0814308
TCGA-VQ-AA68-01	0.030968	0.0111895	-0.055624	-0.00570884	0.0164338	-0.0424292	-0.0545071	0.0739013	0.00776148	0.0161516	-0.0391078	-0.0428449	-0.0278726	-0.0106532	0.0133604	-0.00367877	-0.0827824	-0.0464469	0.0771848	-0.0144962	-0.0408189	0.0572856	-0.0521685
TCGA-VQ-A8PD-01	-0.022091	-0.022992	-0.0813344	0.0541291	-0.017953	-0.031995	0.0417294	-0.00336648	0.0491764	-0.0361357	0.0779439	-0.0464574	0.0176497	-0.0404418	0.00469687	-0.0706436	-0.0659656	-0.000968852	-0.0418192	-0.051811	-0.00220986	-0.00657676	-0.0754141
TCGA-VQ-A94O-01	0.208414	0.0623819	-0.032449	-0.01427	0.00651529	0.00680026	-0.0115732	-0.017835	-0.0376556	0.0947824	-0.0337663	0.230634	0.0956694	-0.002014	-0.043108	0.0227005	-0.0358687	-0.0115805	0.0506002	0.0558406	-0.0423817	0.019492	-0.00873953
TCGA-VQ-A94R-01	0.0578956	0.0163668	-0.0606711	-0.00959743	-0.00229694	0.019288	0.0138561	-0.0356833	-0.00746625	-0.0265789	-0.0165005	0.038943	0.05516	0.000938843	-0.0240995	-0.0289503	-0.0247668	0.0129462	0.0642567	-0.00108926	-0.0294338	-0.00493616	-0.0716079
TCGA-VQ-AA6D-01	0.0834457	0.0744845	-0.0281982	-0.0245666	0.00994938	0.00720697	-0.0713365	-0.000181558	-0.0378779	0.0871729	-0.0415397	0.0373913	0.0823614	-0.00975408	0.0211729	0.0591484	-0.046362	-0.0407007	0.0548701	-0.0468124	-0.0434961	0.0457543	0.0409139
TCGA-BR-8484-01	0.0462167	0.0155703	-0.0520642	0.0300535	-0.0253957	0.133741	0.00299919	-0.0272357	0.0149723	-0.00582722	0.0476739	0.0174383	0.0337163	0.0175256	0.0125552	-0.0395583	-0.0519966	-0.00795202	0.00436375	-0.0130264	0.0592049	0.0224011	-0.0255041
TCGA-BR-8373-01	0.128086	-0.0160122	-0.131047	0.00412796	0.0086069	-0.0240212	0.0323396	0.015644	-0.0302255	-0.0270341	-0.0263468	0.0118084	-0.0318114	-0.0482397	-0.0101467	-0.0656231	-0.107696	0.0418436	0.00669052	-0.0727858	-0.0285804	-0.0156847	-0.11153
TCGA-VQ-A8P2-01	-0.0290516	0.118892	0.0274216	-0.0366326	-0.00562034	-0.00755041	-0.0919504	0.00557139	-0.0147155	0.0554701	-0.0592425	-0.0148736	0.0314965	0.064538	-0.0498736	0.0938311	0.0523107	-0.0557091	-0.00395455	0.0201148	-0.0618341	0.0526804	0.0708237
TCGA-VQ-AA6A-01	0.093592	0.00364596	-0.0573081	-0.0166639	-0.0208491	0.162521	-0.0406352	0.0277926	0.0633909	0.0144368	-0.0429881	0.000317378	-0.03324	0.001521	-0.0382109	-0.0474716	-0.124521	-0.0388065	0.00143772	0.0283511	-0.047919	0.0701584	-0.0577526
TCGA-VQ-A91N-01	0.0454653	0.0563535	-0.0504454	-0.0108482	-0.0199174	-0.0152734	-0.077687	0.012337	0.00728981	0.027631	-0.0453333	0.022874	0.00182431	0.00270752	-0.0351943	-0.00650868	-0.0481055	-0.0564062	-0.0326696	-0.0461467	-0.0594337	0.05929	-0.0166321
TCGA-VQ-A922-01	0.0859123	0.0328185	-0.0700379	-0.00724822	0.0431756	-0.0343122	0.057622	-0.00842739	-0.0373761	0.0267011	-0.0315202	-0.00841491	0.0140596	-0.00794776	-0.0433755	0.0291072	-0.093831	0.0668772	0.165618	-0.0137348	-0.0472918	-0.0275786	-0.0863591
TCGA-VQ-A8PP-01	-0.0153922	0.0224204	-0.0842637	0.00109449	-0.0128433	-0.0316937	-0.0540811	0.0858332	-0.039921	-0.0134606	-0.0185362	-0.0684561	0.00196369	-0.000722657	-0.00983073	-0.0424215	-0.0630638	0.0333203	-0.0258674	-0.0250536	-0.0282429	0.00506587	-0.0813501
TCGA-BR-7717-01	-0.0306624	-0.0428252	0.118946	-0.0466435	-0.0105251	-0.0202988	0.00818487	-0.0119377	0.00884002	0.0459211	-0.0437512	0.0617677	-0.0445836	0.0120146	-0.0384607	0.0487004	0.16351	-0.00347516	0.019663	0.00353081	-0.0437826	0.00186141	0.0894757
TCGA-VQ-A8P3-01	-0.0715553	-0.0259801	0.023237	-0.0429284	-0.0175007	-0.0133221	-0.017407	0.00321271	-0.0110411	-0.0521455	-0.0410238	-0.052816	0.0166869	-0.0312289	-0.0381123	-0.0221919	0.0236635	-0.013678	-0.0360612	-0.0342393	-0.0444646	0.0137266	0.0412647
TCGA-HU-A4H2-01	-0.00820142	0.00247011	0.0234992	-0.0161655	-0.0128472	0.0916788	-0.0437058	-0.0134335	-0.00619426	0.0093492	-0.0305247	0.0039004	0.0425148	-0.00271887	-0.0360262	0.00772316	-0.0106983	-0.048492	-0.045051	0.0923634	-0.0363896	0.0372749	0.0257152
TCGA-BR-8690-01	-0.0293949	-0.0435197	0.0491466	-0.0226041	-0.00748928	-0.018781	-0.0248027	-0.021089	-0.0507655	0.0188965	0.00587009	0.00472666	0.205565	-0.0682311	0.0468545	-0.0346794	0.0874797	-0.0072191	-0.0249695	0.0253472	0.0235637	-0.0151904	0.0766813
TCGA-BR-A4QL-01	-0.0898525	0.00478154	0.0763621	-0.0527363	-0.0180446	-0.0204742	-0.0724439	-0.0401325	-0.0370029	0.0053897	-0.0548941	-0.0393127	0.07805	-0.0201736	-0.0264074	0.0243896	0.177381	-0.0696492	-0.0263941	-0.0122447	-0.0659903	0.0305158	0.135499
TCGA-VQ-A8PK-01	0.023792	0.0102643	-0.0322275	-0.012525	0.00334706	0.0281003	-0.0336772	0.0382248	-0.0127428	0.0473038	-0.0284196	0.00251985	0.00213159	0.00446193	0.0325428	-0.0134506	-0.11545	0.00629585	0.0397647	-0.0214111	-0.0346382	0.0404365	-0.0175606
TCGA-VQ-A928-01	0.0234716	-0.0104151	-0.0516264	-0.026977	-0.0111573	-0.0264906	0.00951023	-0.0160757	-0.0428126	-0.0140158	-0.0468369	-0.010884	0.0278024	-0.0124932	-0.050992	-0.0183194	-0.0387612	0.0303746	-0.028861	-0.00164608	-0.0465855	-0.00780014	-0.0694151
TCGA-VQ-A8PH-01	0.0817354	0.0381144	0.0106503	-0.0331596	0.0425014	-0.0104852	-0.0387189	-0.0388859	-0.0310888	0.13348	-0.0355638	0.0883543	0.135225	-0.0389448	-0.0442204	0.0091159	0.0778142	-0.049686	-0.00660386	0.0653641	-0.0607831	0.0101826	0.0608464
TCGA-VQ-A925-01	-0.0169458	-0.00203361	-0.0383339	-0.0195347	0.0188111	-0.0118544	-0.0317623	0.0148283	0.201793	-0.0238797	-0.0388789	-0.0589796	-0.0020995	-0.0340284	-0.0453162	-0.0437008	-0.0212338	-0.0503881	0.00102642	-0.0664337	-0.058287	0.0496245	-0.0417053
TCGA-HU-8249-01	0.0477149	0.0570934	0.0473885	-0.0154966	-0.00667148	-0.000482195	-0.0268077	-0.0170373	-0.0255642	0.0191926	-0.0260127	-0.00289779	0.0424165	0.0542865	-0.0161718	0.0600573	0.0872644	-0.0413271	0.0826846	0.0416485	-0.0497446	0.014501	0.039878
TCGA-D7-6526-01	0.0367744	0.0304146	0.0170415	-0.0178201	0.0806652	0.0307112	-0.0324052	0.0100724	-0.0130357	0.0915932	-0.0586821	0.010673	-0.0511023	0.0816419	-0.0405449	0.0612803	-0.0426427	-0.0346466	0.0148831	0.186294	-0.0484226	0.0419625	-0.0326327
TCGA-SW-A7EB-01	0.0250967	-0.0344761	0.0336941	-0.0237875	-0.0226158	-0.0284065	0.0095686	-0.0247297	0.112683	-0.00190382	-0.00681075	0.0151685	-0.00956046	-0.030089	-0.0412812	-0.026355	0.067462	-0.0274502	-0.0117781	0.0352184	-0.0315033	0.00629865	0.0393378
TCGA-HU-A4H6-01	-0.0252974	-0.0283092	0.0336176	-0.0155311	-0.0223222	-0.0313941	0.00171561	-0.0195295	0.049308	-0.0471978	-0.00730929	0.00448017	0.138809	-0.0563843	-0.0202445	-0.0229403	0.0351321	-0.0495523	0.00909487	0.0430053	-0.0391251	0.0180665	0.0533859
TCGA-BR-8483-01	0.0516872	-0.0243484	0.0278282	-0.0385956	0.232007	0.067006	-0.0358295	-0.0091133	-0.0379365	0.0321696	-0.0582058	0.115392	0.11607	0.00278136	-0.0288279	-0.0143756	0.00478645	-0.029013	-0.0162199	0.00476599	-0.0598426	0.00530237	0.012669
TCGA-VQ-AA69-01	0.0830184	0.162757	-0.109752	0.0125946	0.0284724	-0.0228072	-0.0558318	0.0306667	-0.0341842	-0.027542	-0.028189	-0.0200127	0.0617769	0.0344194	-0.0227448	0.0150432	-0.0729634	-0.0466028	-0.00591775	0.00448986	-0.0199979	-0.0163067	-0.0688367
TCGA-R5-A7ZE-01	-0.0225249	-0.0118102	0.0417272	-0.0419852	0.258676	-0.0291403	-0.033767	0.253544	-0.0423702	0.0144906	-0.0691925	-0.00231117	-0.0618923	-0.0178006	-0.0691753	0.028507	-0.00212531	-0.0494792	0.00928311	-0.0389534	-0.067549	0.0158039	0.0376824
TCGA-VQ-A8DU-01	0.0222824	-0.00808139	0.00804777	-0.034219	0.00132593	-0.0453622	-0.0120523	-0.0349786	0.00240185	-0.0394772	-0.0408805	-0.00508061	0.116272	-0.0819017	-0.0306182	-0.0182627	0.0786807	-0.0118304	0.00377252	-0.0503285	-0.0556516	-0.00729082	0.0444799
TCGA-HU-A4HD-01	0.0531609	0.0139411	-0.0105383	-0.0300896	0.093006	-0.0304794	-0.0232215	0.00262641	-0.0365084	0.0899359	-0.0541539	0.0712036	0.0330418	-0.00988298	-0.0502684	0.0238172	0.00621829	-0.0273883	-0.0313575	0.00434006	-0.0457674	0.0208763	-0.00287776
TCGA-VQ-A8E2-01	0.196404	0.0390443	-0.0204943	-0.0180275	0.00656086	-0.0117861	0.031945	-0.0153909	-0.0425847	0.046624	-0.0341532	0.187954	0.0502873	-0.00814047	-0.0233194	0.0318043	-0.0108898	0.0639963	0.0480714	-0.0099779	-0.0307698	-0.0329327	-0.0207314
TCGA-VQ-AA64-01	0.0559225	0.0147831	-0.0278201	-0.0117784	-0.00441578	0.00962265	0.00902742	-0.00404672	0.0184339	0.047872	-0.0370806	-0.00428597	0.0255087	-0.00521077	-0.0324726	-0.0237599	-0.0796474	0.107768	0.0287187	0.022864	-0.0463751	0.000615327	-0.0126435
TCGA-VQ-A91V-01	-0.0121499	-0.0161029	-0.041915	-0.0266627	-0.00913322	0.0335312	-0.0629277	0.0292532	0.141141	0.030541	-0.0458715	-0.0455052	0.0047405	-0.0211315	-0.011113	-0.0192305	-0.0836001	-0.0684137	-0.0131443	0.018887	-0.0586729	0.0862675	-0.0174794
TCGA-D7-A74A-01	-0.0268187	-0.0160555	0.0709487	-0.0404273	-0.0133446	0.00822609	-0.0666245	0.000584056	0.0200689	-0.0269899	-0.0482773	0.0160764	-0.0393137	-0.0125198	-0.0314122	-0.00258863	0.195448	-0.0766541	0.00598079	0.0199783	-0.0474631	0.0468296	0.0934193
TCGA-VQ-A91Z-01	0.189084	0.0523442	-0.0771564	-0.0140312	0.00413834	-0.00259436	-0.0480465	0.0288138	-0.054905	0.0383942	-0.0571602	0.126531	0.0522738	-0.0192529	-0.0490835	0.0470695	-0.0192495	-0.0433056	0.0241004	-0.0291727	-0.0699331	0.0146605	-0.0651326
TCGA-FP-7829-01	0.0325121	0.0677035	0.0111529	0.00019977	-0.00617509	-0.042127	-0.0276423	0.0206788	-0.0283646	0.0494349	-0.0455046	0.0314465	-0.0227451	0.0668525	-0.0501482	0.0478471	-0.0617867	0.0153956	0.143393	0.0113163	-0.0281292	0.0586737	0.000814685
TCGA-CD-5804-01	-0.00113074	-0.086485	0.102946	-0.0147395	0.0277954	0.0428008	0.0429964	-0.0222836	0.00687846	0.0620282	-0.0234005	0.0497324	-0.0633126	0.0614782	-0.0020852	0.0403	-0.0174113	0.014246	-0.0096563	0.0351979	0.0177674	0.0102991	0.0245504
TCGA-BR-7716-01	0.100088	0.00819307	0.0395833	0.0359309	-0.00625344	0.0110022	0.022622	0.00228387	-0.0215988	0.0897275	0.0387353	0.0487151	-0.0682482	0.0594385	0.0295477	0.0420431	-0.0473543	0.0270322	-0.00803759	0.270574	0.074602	0.0215171	-0.0245729
TCGA-VQ-A91K-01	-0.0187849	-0.0183305	-0.0142705	0.013452	-0.00299115	-0.0198632	-0.0390007	0.031405	0.0142772	-0.011222	-0.0135468	-0.0366341	-0.040973	0.0328751	0.0459903	-0.0203526	-0.0842977	-0.021827	-0.0126251	-0.012563	0.000821097	0.0502471	-0.051994
TCGA-RD-A8N5-01	-0.0556373	-0.0899751	-0.00851593	-0.00783288	-0.0276078	-0.0242806	0.0503874	-0.0165852	-0.0208003	-0.084543	-0.0156105	-0.0520618	-0.0219285	-0.0741682	-0.0539361	-0.0837027	-0.0211547	0.119177	-0.0690844	-0.0697883	0.0145678	-0.0254593	-0.0343911
TCGA-VQ-A91U-01	0.0230504	0.056989	-0.0511621	-0.00548316	-0.00582059	-0.00883343	-0.0432413	-0.0159863	-0.0236963	0.0598603	-0.0036652	0.00547171	0.0764802	-0.0383623	0.0391765	-0.0118565	0.0203155	-0.0454273	0.115193	0.0106951	-0.0282698	0.0323589	0.00332823
TCGA-VQ-AA6F-01	-0.0149437	-0.0190173	-0.0386461	-0.00145234	-0.00928885	0.0494637	-0.0179021	-0.0138615	0.0256673	-0.0579882	0.00259942	-0.0419227	-0.0205741	-0.0103936	0.0171283	-0.0220666	-0.0283857	-0.0470177	-0.0340962	-0.00147286	-0.0267664	0.0518917	-0.0530831
TCGA-BR-6456-01	0.022315	-0.0180655	0.00453839	0.0188913	-0.017988	0.0403728	0.0634728	0.015549	-0.0390833	0.0413172	-0.00230859	0.00715747	-0.0808421	0.0900953	0.011985	-0.00244258	-0.0541284	0.137336	0.0247274	0.0500195	0.0181959	-0.0275365	-0.0529872
TCGA-BR-7901-01	0.0520791	-0.0533495	0.00922964	0.000855951	-0.0210555	-0.0172863	0.0558146	0.0104285	0.0408924	-0.0032606	-0.00412505	0.0474756	-0.044747	-0.00844813	-0.000601663	-0.0255979	-0.051339	0.0618743	0.0750563	0.0187424	0.0288945	-0.0126395	-0.0164806
TCGA-HF-7133-01	0.0260871	0.0433976	-0.0172441	0.0227059	-0.0215575	-0.0168223	0.00708625	-0.00812225	0.0480225	-0.000312547	0.0204915	-0.0515389	-0.0685535	0.0236524	0.000296096	0.0466049	-0.0261249	0.00238915	0.000214491	0.072947	0.04735	0.0177464	-0.046555
TCGA-BR-4280-01	0.00539959	0.0704112	-0.00803261	-0.0180378	-0.00352088	-0.0277578	-0.0762207	-0.0260871	-0.0385107	-0.00992252	-0.0190424	0.0300417	0.020286	-0.0105562	0.0194563	0.0357639	0.0597533	-0.0564039	-0.00144451	-0.0324895	-0.010398	0.0508075	0.0355246
TCGA-HF-7132-01	-0.0219508	0.0165073	-0.0339862	0.0352862	-0.011742	-0.0239321	-0.00975491	-0.00605657	0.0688451	-0.00431314	0.0523945	-0.0269831	-0.0440235	0.023909	0.0160257	-0.00508275	-0.0443405	-0.00905731	-0.0381238	-0.0105328	0.0195353	0.0255906	-0.0479065
TCGA-CG-5718-01	0.0257638	-0.0404707	0.109375	0.00411277	-0.0138949	0.0345402	0.035655	0.00430412	0.00975527	0.236763	0.00905354	0.145118	-0.0683152	0.0987244	-0.0128004	0.0952713	-0.0396453	-0.0106355	0.177145	0.0733931	0.0301429	0.019647	-0.0116976
TCGA-CG-5732-01	0.0457136	-0.0417181	0.0721829	0.0145234	0.00196128	0.00256872	-0.012276	-0.00208094	0.0761916	0.0532625	0.0311733	0.0224354	-0.0942286	0.0400228	-0.000553232	0.0636112	0.00773369	-0.0464911	0.0587366	-0.0320455	0.00656068	0.0572735	0.0207523
TCGA-D7-5577-01	-0.0156086	-0.00394236	0.0943326	0.0113968	-0.0121789	-0.0010679	-0.0137973	0.0274966	0.00816925	-0.00285144	0.0220113	0.0291274	-0.0593311	0.0734093	0.119083	0.0654204	0.0629773	-0.03024	0.00626666	0.217281	0.130775	0.0341616	0.0647436
TCGA-D7-8572-01	0.0378587	0.0425165	-0.0372236	0.0160327	-0.0197116	-0.0220044	0.0217477	-0.0157699	-0.0446924	0.0031277	0.00490769	-0.0227444	-0.0152205	0.0271298	-0.003426	0.00330169	-0.0319038	0.099619	0.00636835	0.000724803	0.0109827	-0.0250671	-0.0574724
TCGA-CG-4441-01	0.0222643	0.00162833	0.0241717	-0.00760879	-0.01616	-0.00157469	-0.00848411	-0.000684487	0.0114792	0.04969	-0.0186525	0.0301535	-0.0691806	0.0695451	-0.0212998	0.0491278	-0.0353971	0.0440531	0.00574693	0.00526185	-0.00134419	0.0436987	-0.0308302
TCGA-HU-A4G3-01	-0.0638349	-0.0581598	-0.00787453	-0.0422001	-0.0183977	-0.0264644	-0.0200077	-0.0187067	0.164721	-0.0421196	-0.0469371	-0.0653237	-0.0327574	-0.0322075	-0.0595836	-0.0509272	0.00779582	-0.0562778	-0.0369483	-0.0407231	-0.0585325	0.0465363	-0.0137584
TCGA-D7-6815-01	0.0394795	0.0173221	-0.0307514	-0.0158326	0.296826	0.0230556	-0.0326221	-0.00987637	-0.00744099	0.044495	-0.0334736	0.000602818	-0.0682746	0.0223048	-0.0160161	0.0157327	-0.0645856	0.00110736	0.0497519	0.000320593	-0.0350444	0.0389719	-0.0397915
TCGA-D7-8579-01	-0.0358839	-0.0649174	-0.0465447	-0.00893226	0.0186639	-0.0222881	0.0658873	-0.0231753	-0.0106844	-0.0450494	-0.00712363	-0.0384437	-0.0283722	-0.0426892	-0.0321293	-0.0651245	-0.0635175	0.00980039	-0.0392287	-0.0584883	-0.0140705	-0.0771074	-0.0822147
TCGA-CD-8527-01	-0.00406323	-0.0163932	0.11587	-0.0203892	-0.0117021	0.51652	-0.0309131	0.00601756	-0.0308849	0.0508532	-0.0381824	0.0599361	0.0498885	0.0321649	0.0370878	0.0454769	0.0776808	-0.0262302	0.0350923	0.0388144	-0.0192576	0.0161656	0.156115
TCGA-IN-A6RL-01	-0.00958769	-0.0263021	0.0405041	-0.0273353	-0.00363548	0.0112893	-0.0230474	0.0205237	0.178035	0.00348187	-0.0304915	-0.000267251	-0.016307	-0.0201425	-0.0150061	0.00328598	0.0165898	-0.0454417	0.0338747	0.0481166	-0.0315258	0.0458769	0.0557107
TCGA-HU-A4GP-01	-0.0292242	0.00551825	-0.0210547	-0.0251518	-0.0227681	-0.00822581	-0.025398	0.025876	0.0924072	0.00982483	-0.0484841	-0.0280177	-0.0157162	0.0129033	-0.042172	-0.0108274	-0.0289139	-0.0638114	-0.0368347	-0.0143653	-0.0615647	0.0658697	0.00371415
TCGA-IN-8462-01	-0.0780363	-0.0972697	0.0239102	-0.0394858	-0.0131292	-0.0447374	0.0214325	0.172675	-0.00528103	-0.0675049	-0.0399894	-0.0560813	-0.020305	-0.0467908	-0.0294156	-0.0499101	0.00512735	-0.0283227	-0.0407759	-0.0268138	-0.0509741	-0.020162	0.000391101
TCGA-CG-4437-01	-0.0375732	-0.0254751	0.151944	0.00683825	-0.00784923	0.0135378	-0.00455707	0.0144616	-0.00272984	0.0792286	0.0033355	0.0162276	-0.0848151	0.160972	0.0712685	0.11152	0.0699959	0.0119439	0.0495961	0.0947957	0.0686168	0.0352037	0.0467564
TCGA-CD-8529-01	0.0161299	-0.0274217	-0.00123975	0.0589325	-0.00683461	0.00512162	0.0620278	-0.000987712	0.0741732	-0.0209524	0.0780266	-0.0122752	-0.0434846	0.0334721	0.017711	-0.0107352	-0.05869	0.0561328	-0.00487484	-0.0182665	0.0962854	-0.00555164	-0.0438239
TCGA-BR-6565-01	0.0433713	0.0422094	0.0248709	0.0153808	0.13277	0.025168	-0.00233155	-0.0079672	-0.041135	0.116126	0.00459627	0.0790608	-0.0380072	0.124958	0.0558188	0.0980329	-0.0234071	0.0221027	0.0677234	0.0844639	0.0377081	0.000163005	-0.0198079
TCGA-BR-8081-01	-0.0422691	0.0237634	0.0281401	0.0325986	-0.0147633	-0.023335	0.00166618	-0.00971691	-0.0439451	-0.00755478	0.0555136	-0.0347259	-0.0296845	0.0277534	0.071609	0.0282241	0.0451125	0.0376555	-0.0184881	-0.0100828	0.0963392	0.00494	0.0227107
TCGA-VQ-A8P8-01	-0.0513049	-0.0181119	-0.0460544	0.00315407	-0.02136	-0.0272267	0.00019206	-0.00638639	0.0691985	-0.0552773	0.0205882	-0.063223	0.0182773	-0.0458126	-0.0066346	-0.0559793	-0.0332159	-0.0246913	-0.0408135	-0.0506693	-0.0386536	0.0125542	-0.0160318
TCGA-BR-A4J6-01	-0.0666001	-0.0755925	0.0409159	-0.0323545	-0.0244281	0.000527717	-0.00948945	0.00753672	0.131732	-0.0500404	-0.0250597	-0.0358493	0.0189735	-0.0321436	-0.0336107	-0.0390327	0.0632435	-0.00914552	-0.0220888	-0.0137977	-0.0323111	0.00995437	0.0474639
TCGA-HU-A4GF-01	0.0680581	0.048669	-0.0252489	-0.0139286	0.18344	-0.00187954	-0.0234373	-0.00645458	-0.0289746	0.0334154	-0.0316378	0.0374942	0.0480675	-0.0230749	0.00178788	0.0296629	-0.0131173	-0.0451013	0.0585044	-0.0271701	-0.0350222	0.0269551	-0.00767828
TCGA-CD-A48A-01	0.0141435	-0.0473183	0.0344447	-0.0320063	-0.013928	0.0140123	-0.0323967	-0.0368378	-0.0408915	-0.0404343	-0.037907	0.00606182	0.0922739	-0.0256182	-0.0221856	-0.0030399	0.0361192	-0.0489934	-0.0360109	-0.00392536	-0.0277167	-0.00853194	0.0383598
TCGA-F1-A72C-01	-0.0137873	-0.0171871	0.0710259	-0.0195202	-0.0153508	-0.000471385	-0.00817809	-0.00756836	-0.024967	-0.0287589	-0.0124424	0.0229798	-0.0255953	0.0131194	0.0566135	-0.0054073	0.0253819	0.0169269	-0.0109245	0.00983546	0.0132328	0.0162452	0.0844979
TCGA-BR-7715-01	0.0940844	0.0229686	0.0281911	-0.0315834	0.0756592	0.0228379	0.022225	-0.0229338	-0.0478899	0.0968965	-0.0427517	0.185489	-0.0274993	0.0377143	-0.0447216	0.0825785	0.0382815	0.0318104	0.0361953	-0.0350641	-0.0365518	-0.0261443	0.0039317
TCGA-VQ-AA6G-01	-0.0132023	-0.0324383	-0.0747693	-0.0158418	0.146261	-0.0278853	-0.0532113	0.0565853	0.0200292	-0.060211	-0.0472928	-0.0568717	-0.050296	-0.0376729	0.0242233	-0.0607079	-0.111152	-0.0501833	0.0433916	-0.0692203	-0.0582115	0.0809107	-0.0682656
TCGA-HU-8604-01	0.00572342	0.0478941	0.0363198	0.0265372	-0.0141435	-0.0204096	-0.00350763	-0.0319478	-0.0639896	-0.00545449	0.0466354	-0.0121893	0.0233867	0.0287957	0.020233	0.0422636	0.102641	0.0264367	-0.0142423	0.0336749	0.052523	-0.00182817	0.0162397
TCGA-BR-6801-01	0.0137878	-0.0651328	0.0633502	-0.0215132	-0.0148006	0.0509664	-0.00511158	0.0255695	-0.0393813	0.0627822	-0.0513264	0.106218	-0.0714823	0.0329656	-0.0371587	-0.00729189	0.00435663	0.00916881	-0.0109463	-0.00986759	-0.0450531	-0.00158495	-0.0201707
TCGA-CD-A486-01	0.0290651	-0.0278919	0.0331245	-0.0194433	-0.000353822	0.0659113	-0.00637468	-0.0121317	-0.032243	0.0514941	-0.0270713	0.0563917	0.0458352	-0.0244179	-0.0102625	0.0168424	-0.01021	0.0161533	0.0835279	-0.0284057	0.0139153	0.00698193	0.0504236
TCGA-VQ-A924-01	-0.0280189	0.0766864	-0.00721347	-0.0092235	-0.00487326	-0.0256906	-0.0676107	0.0190371	-0.0334189	-0.00724835	-0.0187482	-0.02524	0.0127589	0.0285156	0.119283	0.0343657	-0.0223967	-0.020872	-0.0148896	0.000681998	-0.0101019	0.0325068	-0.000854263
TCGA-CD-5798-01	-0.0819871	-0.100356	0.0939296	-0.01687	-0.0272588	-0.01317	0.0516456	0.0242851	-0.00756897	-0.0435144	-0.0265258	-0.0357726	-0.0995617	0.0173599	-0.0322069	-0.0203237	0.0354367	0.106228	-0.0234353	-0.00528623	0.019248	-0.101267	0.0215345
TCGA-VQ-A8PB-01	-0.044007	0.113353	-0.0682157	-0.0313317	-0.0218594	0.000663653	-0.0880489	0.00441023	-0.0338906	-0.0416477	-0.0448209	-0.0628799	0.0348475	-0.0415179	-0.0645623	-0.00171681	0.0319212	-0.026141	-0.0330368	-0.0499691	-0.0531723	0.0374904	0.0196195
TCGA-CD-8532-01	0.0151883	-0.0189713	0.0169941	0.0489534	-0.0163146	-7.41531e-05	0.014012	-0.00761532	0.0889132	-0.018856	0.0904198	0.0297927	-0.0329371	0.0413683	0.0419667	-0.0129662	-0.0293434	-0.0132715	-0.0471671	0.0324835	0.0596157	0.0304105	-0.0173726
TCGA-CD-A4MH-01	0.0502186	-0.0281242	0.00751307	-0.0385855	-0.000367481	0.00820598	-0.0314786	-0.0393458	-0.0281901	-0.0341303	-0.0417702	0.135667	0.136581	-0.0666149	-0.0311002	-0.0495133	0.0215525	-0.0331995	-0.012032	-0.00556112	-0.0567654	0.0152831	0.0502701
TCGA-VQ-A92D-01	0.011465	-0.010244	-0.0314998	-0.0340681	0.101153	0.0655562	-0.0275769	0.0496419	-0.0356739	-0.0256346	-0.0552597	-0.00831431	-0.00916467	0.0327103	0.00753775	-0.0320871	-0.0663105	-0.014813	0.129227	-0.00439577	-0.0630302	0.0468868	-0.0561507
TCGA-CG-4304-01	0.02094	-0.0262901	-0.0677399	-0.00681448	-0.00895612	-0.0119595	-0.0106603	-0.029849	0.0109983	-0.0599138	0.0180454	-0.0326316	0.0175132	-0.0798304	-0.0494167	-0.0571142	-0.0730329	0.00492089	-0.0310423	-0.0686206	0.00212195	0.0126304	-0.0344078
TCGA-BR-4267-01	-0.0294039	-0.00875505	-0.0379021	-0.0176476	-0.0238242	-0.0310225	-0.0495677	0.00992463	0.26349	-0.0218313	-0.0223249	-0.0763516	-0.0693286	-0.0187893	-0.0370259	-0.0238589	-0.0206535	-0.0330476	0.0397854	-0.041035	-0.00590593	0.0479419	-0.0125685
TCGA-CG-4466-01	0.0365595	0.0676844	-0.0633195	-0.0486846	0.116083	-0.0255144	-0.0730455	-0.0236656	-0.0247811	-0.0518945	-0.0532938	0.0388256	0.047049	-0.096555	-0.0627408	0.019168	-0.00395808	-0.0561408	-0.0187665	-0.0919371	-0.068707	0.0263332	0.0283991
TCGA-D7-6822-01	0.148917	0.0491342	-0.0447327	-0.0102861	-0.00891895	-0.0264261	-0.0346844	0.0121635	-0.0442588	0.0735944	-0.0493221	0.0621673	-0.0314405	0.00179186	-0.00505308	0.0148494	-0.0904938	-0.00534981	0.030154	0.168704	-0.0304232	0.00708225	-0.0480676
TCGA-CG-4436-01	0.0344513	0.0954751	-0.0427614	-0.0247724	-0.00753007	0.060392	-0.0832156	-0.0371841	-0.0216208	-0.0174542	-0.0422795	0.0761174	0.00738972	-0.0702275	-0.0218943	0.0334773	0.00752222	-0.0622733	-0.0037194	-0.0552443	-0.0231551	0.04305	0.0937365
TCGA-D7-8578-01	0.0320432	-0.0724111	-0.0155282	-0.00715246	-0.0170149	0.00333372	0.0432005	-0.000119894	0.0190233	-0.0340671	-0.0248137	-0.0176073	-0.0521248	-0.0256517	-0.0360841	-0.0695085	-0.0826441	0.153692	-0.0290297	0.0501272	-0.0172229	-0.0409417	-0.0704286
TCGA-D7-6528-01	0.0876284	0.0496537	0.0685849	-0.00958862	-0.00206213	0.0604062	-0.0457136	0.0197615	-0.0551106	0.158965	-0.0508695	0.148609	-0.020766	0.148982	0.0224046	0.131065	-0.00560259	-0.0320612	0.424317	0.0404749	-0.0430881	0.0426726	0.0145009
TCGA-F1-6875-01	0.131094	0.0363706	0.013382	-0.00820355	-0.00503058	0.0111499	-0.0164013	0.0142502	-0.0458285	0.0983878	-0.0462254	0.239215	0.0161474	0.0429821	-0.0635586	0.0707892	-0.027942	-0.013116	-0.0216953	0.0582381	-0.0628209	-0.00367315	-0.0381231
TCGA-BR-8678-01	0.140587	0.150499	-0.0537718	-0.00483926	-0.00286468	-0.0259876	-0.0331035	0.0292848	-0.0475077	0.0463448	-0.0388362	0.0791163	0.0863121	0.0259637	0.0127294	0.0636805	-0.0368236	0.00317316	0.0531557	0.00991624	-0.0471487	-0.0133162	-0.0277711
TCGA-BR-8679-01	0.0827723	0.0500927	-0.0545708	-0.0168876	-0.0213859	-0.0016321	-0.0321636	-5.4689e-05	-0.0211627	0.0199353	-0.0404209	0.0697846	0.0487759	-0.0209461	0.0456855	-0.0300748	-0.0079092	-0.000252623	0.0184823	-0.0357157	-0.0310926	0.0252214	-0.0154611
TCGA-VQ-A8DV-01	0.0221103	-0.0176549	0.0326272	-0.0610879	-0.0169742	-0.00492675	-0.0313855	-0.0518082	-0.0313969	-0.0343085	-0.0630793	0.0216882	0.097487	-0.0745424	-0.0903672	-0.0232048	0.077598	-0.0439949	-0.029993	0.0860278	-0.0420627	-0.0116392	0.098712
TCGA-VQ-A91A-01	0.00461968	-0.0245463	-0.0322852	-0.00219571	-0.0177114	-0.0176072	0.0431448	-0.00521748	-0.0475798	-0.0198796	-0.0214171	-0.0319951	-0.0132581	-0.021201	-0.0454762	-0.0472459	-0.0565228	0.144749	-0.0355637	0.00159393	-0.0064852	-0.018312	-0.060206
TCGA-VQ-A927-01	-0.0583069	-0.0595906	-0.0575295	-0.018491	-0.0126582	-0.0326587	-0.0034025	-0.00480551	0.20295	-0.0593487	-0.0164114	-0.0772338	0.000262937	-0.0592613	-0.0202941	-0.0837041	-0.0673284	-0.0433727	-0.0518988	-0.0639596	-0.0526191	0.0364173	-0.0520275
TCGA-KB-A93H-01	0.0203278	0.0182761	0.0375975	-0.0429	-0.0210942	-0.0237091	-0.068078	-0.0297503	-0.0165999	0.0271282	-0.0565833	0.0750743	0.166254	-0.0402085	-0.00514192	0.00929282	0.0877028	-0.0722104	-0.0126971	0.0193541	-0.0611494	0.0425383	0.0989881
TCGA-CG-5719-01	-0.0423746	-0.0787171	0.0742117	-0.00402083	-0.00884196	-0.0110137	0.0891444	0.00217515	0.013064	-0.0127892	-0.00434295	-0.00205208	-0.0857097	0.0590473	-0.0222961	0.0121212	0.00392747	0.0995254	-0.0201896	0.027319	0.0190171	-0.0218131	-0.0108022
TCGA-CD-5800-01	0.0767529	0.0290798	0.123039	-0.0112806	0.111258	0.031041	0.00915806	-0.00113848	-0.0296635	0.201711	-0.0358123	0.0986999	-0.0147709	0.158916	0.0148997	0.182552	0.00503163	-0.0127312	0.0251548	0.0749463	-0.0194415	0.0249534	0.0725534
TCGA-KB-A93G-01	-0.025545	-0.0750284	-0.0695226	0.0112504	-0.0312341	-0.0515599	0.120408	-0.0116532	-0.0273918	-0.0721762	-0.00303622	-0.0616339	-0.0305639	-0.0634285	-0.0575014	-0.100748	-0.0933608	0.291582	-0.0552249	-0.0539042	0.0101025	-0.0669044	-0.105912
TCGA-KB-A6F7-01	0.0468595	0.0601233	0.027202	-0.000756825	-0.0112646	0.0288971	-0.0222022	-0.0273535	-0.00839941	0.0648374	0.00722056	0.00838597	-0.00840473	0.0134968	0.00753158	0.115114	0.0297086	-0.0316903	0.0208258	0.106454	0.038447	0.0236659	0.0683334
TCGA-IN-A6RJ-01	-0.0870557	-0.100718	0.0316109	-0.0502677	-0.0159277	-0.0385225	-0.0192255	0.453045	-0.0462068	-0.0638217	-0.0587839	-0.0725045	-0.087976	-0.0386806	-0.0320596	-0.0619729	0.0339487	-0.0638501	-0.0505492	-0.0392515	-0.0683774	-0.0194251	-0.00872916
TCGA-IN-A6RN-01	-0.0642678	-0.0720626	0.00388065	-0.0429479	-0.00752926	-0.0441911	-0.032174	0.00632303	0.169253	-0.0616391	-0.046046	-0.0647417	-0.000451321	-0.060398	-0.0662782	-0.0494892	0.0124335	-0.0556466	0.0478981	-0.0368299	-0.0598557	0.03222	0.048027
TCGA-FP-A9TM-01	-0.0074361	0.00451296	-0.069668	0.0345695	-0.0140811	0.0214176	-0.0455233	-0.0208723	0.019709	-0.0355653	0.026224	-0.0399235	0.0642408	-0.0529944	-0.0166555	-0.0489875	-0.0462408	-0.0693689	-0.039405	-0.0164106	-0.047384	0.0302447	-0.045039
TCGA-HU-A4H8-01	-0.0259532	0.0380003	-0.0511391	-0.0261512	-0.0173949	-0.0281867	-0.0623401	-0.0125116	-0.025599	-0.0217379	-0.0344101	-0.0531063	0.0199011	-0.0174498	0.0227269	-0.020895	-0.0342068	-0.0812362	-0.0249729	-0.0376137	-0.0344497	0.0514983	-0.021473
TCGA-IN-A6RO-01	-0.0194329	0.100544	0.0217125	-0.0301219	0.208328	0.0098196	-0.0800549	0.0108437	0.029304	0.0170373	-0.0615126	-0.0282762	0.00336632	0.0397403	0.0195204	0.102264	-0.0123333	-0.0735671	0.00267934	0.0493746	-0.0536964	0.0751013	0.057848
TCGA-IN-AB1V-01	-0.043965	-0.0666714	-0.0594053	-0.028748	-0.00756808	-0.0347406	-0.0283813	0.304696	0.018117	-0.06109	-0.0423683	-0.0809874	0.00894846	-0.0577242	-0.0373401	-0.0804816	-0.0411087	-0.0585375	-0.0465235	-0.0447215	-0.0634546	-0.0055791	-0.0605201
TCGA-HU-A4GH-01	0.00418944	-0.0236038	0.00924801	-0.0229947	0.0399705	-0.0391739	-0.0540357	0.000567092	0.00417186	0.022653	-0.0502549	0.0067683	0.0964796	-0.0279765	-0.0456197	-0.0243896	-0.0793563	-0.0627002	-0.0310695	-0.0245897	-0.0545755	0.0581208	0.0358225
TCGA-HU-8610-01	0.00968149	-0.0232116	-0.0418237	0.0281827	-0.0113681	-0.0319654	0.0535831	0.00695658	-0.0307466	0.00554249	0.0228882	0.00529182	-0.0133619	-0.0136426	-0.00256774	-0.0343327	-0.0652678	0.0161215	-0.0250369	-0.0246074	0.0319604	-0.00419646	-0.0688186
TCGA-IN-A6RI-01	0.0258698	0.0344099	0.08083	-0.0396174	-0.00605788	-0.0292862	-0.056577	-0.00806039	0.0606109	0.077004	-0.0462545	0.0470293	-0.000712392	0.0724266	-0.0207178	0.0829461	0.00952555	-0.0676454	0.0429693	-0.0247937	-0.0468213	0.0798672	0.162981
TCGA-IN-A6RS-01	-0.0245347	0.0103447	0.0221436	-0.0337716	0.0876011	-0.0273596	-0.0287394	-0.00557656	-0.0395024	0.0170466	-0.033428	0.0216115	-0.0233384	-0.0564844	0.00798839	0.0426841	0.0533721	-0.0468964	0.307014	-0.0847945	-0.022634	0.03062	0.0810096
TCGA-BR-8486-01	0.0228208	-0.00585186	-0.00811595	0.00343272	0.0294458	-0.0146231	0.0344431	-0.0197233	-0.0153003	0.0132939	-0.00286529	-0.0086097	0.0132051	0.013798	0.00656571	0.000304088	-0.0572868	0.00625289	0.229381	-0.0110281	-0.0174032	0.0249329	-0.0192219
TCGA-HU-A4G9-01	-0.0494584	0.0291363	-0.0416637	-0.0385396	-0.0242891	-0.0331428	-0.0815514	-0.0213246	0.0714699	0.0139157	-0.0506221	-0.0602892	-0.0350181	-0.0139433	-0.0408336	-0.022087	0.00732535	-0.095302	-0.0370149	-0.0473564	-0.0679047	0.0715811	-0.0246008
TCGA-CG-4443-01	0.109654	0.00779334	-0.0411373	-0.0293813	-0.015993	-0.0455164	-0.0370706	-0.0177325	-0.0233707	-0.0071263	-0.0512108	-0.000300882	0.0157402	-0.057597	-0.0742507	0.0233413	-0.0478736	-0.0342951	0.0146346	-0.0672421	-0.0359463	0.0147484	0.00905348
TCGA-VQ-A8PX-01	0.0148191	0.0163361	-0.0430973	-0.00370185	-0.0255752	-0.0212904	-0.0352194	-0.00904197	0.0918292	0.0554582	-0.0141643	0.000656515	0.0202456	-0.00904441	0.00195511	-0.0270515	-0.0553245	-0.0694067	-0.0177865	-0.0234687	-0.0430569	0.0738715	-0.0401471
TCGA-HF-7134-01	0.0261058	0.0319589	-0.0401968	-0.0091132	-0.0159172	0.00234202	-0.00794978	0.000785754	0.00208805	0.0492794	-0.0253571	-0.00400365	-0.0537404	0.0208531	-0.0239212	-0.00400901	-0.0537389	-0.0300171	0.363337	-0.0178727	-0.0316328	0.0489164	-0.064002
TCGA-CG-5726-01	0.0101938	0.0409991	0.0785018	-0.0313212	-0.0154013	0.0443677	-0.052573	-0.00333443	-0.00552919	0.159489	-0.057987	0.0455105	-0.0741983	0.139373	-0.0294946	0.120311	0.0635497	-0.0724068	0.018125	0.0502528	-0.0530127	0.0684381	0.00817377
TCGA-HU-8244-01	-0.0163841	-0.0205892	0.0170358	-0.0431053	-0.0193161	-0.0306575	-0.0498443	-0.0231902	0.00622082	0.00451712	-0.0636041	-0.0103448	-0.0311796	-0.0175514	-0.0608005	-0.0209192	0.0230866	-0.085362	-0.0370588	0.110477	-0.0667899	0.0562008	-0.0183038
