# Supplementary material for: Candidate genes in gastric cancer identified by constructing a weighted gene co-expression network
Source: PeerJ. 2018 May 4;6:e4692. doi: 10.7717/peerj.4692 (PMC5937478; doi:10.7717/peerj.4692)
Supplement: Table S2 [file peerj-06-4692-s003.xlsx]

## Sheet: MEs after module merging
	MEgreen	MEmidnightblue	MEcyan	MElightcyan	MEtan	MEgreenyellow	MElightyellow	MEbrown	MEpurple	MEyellow	MEdarkgreen	MEdarkred	MEblue	MEturquoise	MEroyalblue	MEblack	MElightgreen	MEgrey60	MEsalmon	MEgrey
TCGA-D7-A748-01	0.0944451	-0.0150914	-0.000901165	0.0190619	0.14837	-0.0110712	-0.0826653	0.0438425	0.0295879	0.0370101	-0.0318084	-0.0357953	-0.108822	-0.0240855	-0.0484252	-0.0993704	-0.0602991	-0.0751774	-0.0564972	0.0606581
TCGA-BR-8289-01	0.014085	-0.0418254	-0.0253776	-0.0310321	-0.0130347	-0.0247292	0.00189008	0.0143314	0.00969474	0.0164204	0.0305594	-0.00910357	0.0149467	-0.0114848	0.0166361	0.0511422	0.0195072	0.0533829	0.0175015	-0.018275
TCGA-CG-4465-01	-0.0411687	0.0276124	-0.00349265	-0.0110027	0.0593288	-0.0140244	-0.019761	-0.0550843	-0.0031076	0.0469806	-0.0118701	-0.0347338	0.0694718	0.0531117	-0.025318	-0.0485499	-0.0542649	-0.0454215	-0.0706751	-0.0288169
TCGA-VQ-A8DZ-01	-0.025625	-0.043298	-0.0301599	-0.0446308	-0.0347443	0.0182379	0.0345048	0.0648352	-0.00998827	0.0870915	0.0480753	-0.0182349	0.00130841	0.0422689	0.0350002	0.0673166	0.0798195	0.0665323	-0.0209255	-0.0196841
TCGA-R5-A7ZI-01	-0.049709	0.0770633	-0.0128736	0.0168539	0.0725777	-0.0394366	-0.0452445	0.120355	0.10187	0.13919	-0.0337379	0.00983894	-0.0445064	0.0196465	-0.0370704	-0.0714871	-0.00208836	0.0182158	-0.025381	0.00193544
TCGA-CG-4301-01	-0.00568613	-0.0326354	-0.0116346	0.00118287	0.0199005	-0.0029273	0.00632083	-0.0945323	-0.0420357	0.00639783	0.0264341	-0.0539931	-0.009416	0.0112095	-0.0309899	-0.026847	-0.0696275	-0.0944962	-0.0834739	0.0331699
TCGA-BR-7196-01	0.130443	0.0246071	0.0246281	0.0542399	0.0455086	-0.0181873	-0.0296245	-0.00810075	-0.026022	-0.0471586	-0.0163991	-0.0181053	-0.0179023	-0.0582139	0.000773093	0.00386294	0.0118345	0.00972755	0.0450624	-0.0223483
TCGA-CG-4462-01	0.151244	-0.036463	0.0379259	0.0494151	0.130357	-0.0147566	-0.055125	-0.0774626	-0.0659166	-0.0564234	-0.030161	-0.046212	-0.0584656	-0.0464188	-0.0378857	-0.053779	-0.05893	-0.0876556	-0.0759394	0.039333
TCGA-IN-A7NR-01	-0.0278619	-0.0241235	-0.0308421	-0.0177251	-0.0388864	0.114439	-0.0453067	0.0176623	0.0371784	0.0270869	-0.016184	-0.0128938	-0.0612843	-0.00709965	-0.0378179	-0.0636052	-0.0593511	-0.0518944	-0.0194315	0.0287172
TCGA-CG-4440-01	-0.0420108	0.00419856	-0.0145115	-0.0411624	-0.0201882	0.0119666	0.0240745	-0.0243474	-0.019624	0.0379523	-0.00240573	0.0403559	0.105278	0.0290651	0.0100276	0.0194026	0.0164153	0.0228596	0.0514412	0.0102021
TCGA-CG-5724-01	0.0131589	0.00448264	-0.000327983	-0.0425433	-0.00419294	0.1335	-0.0787402	0.168686	0.0698301	0.0417292	0.0224424	0.0759084	-0.00603812	-0.00556539	0.00906108	-0.00716937	0.0385885	0.134128	0.0646662	-0.0405379
TCGA-IN-7808-01	-0.0014161	-0.0320233	0.111936	0.239802	0.0145171	-0.0430765	0.0640936	0.02102	0.0701241	-0.0307478	-0.0252158	-0.00303386	-0.048599	-0.0180537	-0.0357133	-0.023936	0.00335236	-0.0254604	0.0250087	-0.0379073
TCGA-CG-4306-01	-0.0265466	0.0310463	-0.00322752	0.00666137	0.02202	-0.00111048	0.00807859	-0.0593939	0.00262637	0.0607997	-0.0254418	-0.0369078	0.0642499	0.0322463	-0.0180271	-0.0519692	-0.0570536	-0.0492411	-0.063737	0.0321276
TCGA-CG-5722-01	0.00293028	0.0145681	0.0909257	0.142431	0.0728169	-0.00174931	-0.0439572	0.11209	0.0798178	0.0378129	-0.013108	-0.0125583	0.00291963	-0.00437929	-0.0029519	-0.0230934	0.00405255	0.0793632	0.184351	0.0418811
TCGA-BR-8372-01	-0.0757586	0.119299	-0.00614246	0.00944276	0.0776179	-0.0276215	-0.0356112	0.0473607	0.124844	0.111819	-0.0227973	-0.0032435	0.126662	0.0406755	0.0127374	-0.0511241	-0.0213765	0.0742721	-0.00776447	-0.0323804
TCGA-CG-4476-01	0.0247938	-0.0387816	0.00656195	0.0325862	0.0486142	-0.0290086	0.00423291	-0.0836305	-0.0343189	-0.00893986	-0.0244172	-0.0307552	-0.00961135	-0.0061903	-0.0316926	-0.0064426	-0.00881483	-0.0760915	-0.0952898	0.0810598
TCGA-BR-A4CS-01	-0.0116881	-0.0206337	-0.0398837	-0.0393584	-0.0185477	-0.0303592	0.0591878	0.0388666	0.00490182	0.052343	0.0342751	-0.0315446	-0.0581108	0.00438986	-0.0266913	-0.0171143	0.109467	-0.0359337	-0.0654743	-0.0197642
TCGA-BR-8382-01	0.00845682	0.125812	-0.0167832	-0.0110813	0.00985762	0.00758902	-0.00164649	0.0183314	0.0118963	0.00987678	-0.014019	-0.0162461	-0.00172542	0.00887903	-0.0235664	-0.0565605	-0.0476667	0.00575558	-0.0166378	-0.0471305
TCGA-BR-A4CR-01	-0.0483223	-0.0750967	-0.0208714	-0.051989	-0.0742431	-0.0446708	0.114455	-0.0777452	0.018086	-0.0391121	-0.022415	-0.0360378	0.135607	-0.00785532	0.00666052	0.0459704	0.0855716	-0.0147	0.0866543	-0.0314605
TCGA-BR-8687-01	-0.0151081	-0.067115	-0.0297001	-0.0441587	-0.048393	-0.0238593	-0.0518679	-0.0350747	-0.0353762	-0.0475383	-0.0222792	-0.0242478	-0.0358673	0.0140627	-0.0146837	0.0540442	-0.0266759	-0.0254048	-0.0409334	0.0974604
TCGA-BR-8361-01	-0.0543931	0.0588975	-0.026931	-0.0116446	-0.0257414	-0.0177859	-0.0134307	-0.00940011	0.121348	-0.0254156	-0.0196534	-0.0163116	0.0496132	0.0202464	-0.0191569	-0.0316357	-0.039656	0.0421609	-0.0229637	-0.0523138
TCGA-BR-8384-01	0.0856933	-0.0440977	-0.0128375	0.00697902	-0.0178936	-0.045125	-0.0424359	-0.0854931	-0.0571043	-0.103773	-0.0318031	-0.0547497	-0.0853883	-0.191804	-0.0479387	-0.0541563	-0.0622078	-0.0982365	-0.0751777	-0.0318451
TCGA-BR-8590-01	0.0510208	-0.00623878	0.0150963	0.0239292	0.0353269	0.00232093	-0.0301521	-0.0594643	-0.0521199	-0.0530013	-0.0196589	-0.0148746	-0.00634649	-0.0335588	-0.0340858	-0.00632888	-0.0271936	-0.0322273	-0.0335855	0.0314041
TCGA-BR-8296-01	0.000493745	0.0089723	0.0392748	0.0542222	-0.00866752	-0.00211648	-0.00121045	-0.00774793	-0.0378488	-0.0290039	-0.0161095	0.0136853	-0.0306017	0.0171088	-0.0076817	0.0211292	0.0360846	0.0107894	0.0317506	0.00130713
TCGA-BR-8364-01	0.126062	-0.0346463	0.00262669	0.0163373	0.0196475	-0.0247857	-0.0668489	-0.0546005	-0.0402859	-0.0755494	-0.0273567	-0.041146	-0.0738025	-0.114723	-0.0351562	-0.0473619	-0.0557178	-0.0752681	-0.0482165	-0.0105566
TCGA-HU-A4GX-01	-0.0664814	0.0775959	-0.0234404	0.0136543	0.00663869	-0.0337131	0.048644	0.0240432	0.0567095	0.0617321	-0.0198593	0.0221533	0.00571756	0.0404253	-0.027203	-0.0352415	-0.000269323	-0.00996165	-0.0187684	0.0458632
TCGA-BR-8592-01	0.0736889	-0.0558344	-0.0090121	0.00950627	-0.021418	-0.0469425	-0.0171834	-0.0550399	-0.0199692	-0.0707616	-0.0279127	-0.0510907	-0.0765007	-0.157532	-0.0440878	-0.0621591	-0.0662467	-0.086114	-0.0666913	-0.00803711
TCGA-BR-8589-01	-0.0478317	0.0746407	0.0266057	0.0442162	0.105344	-0.0192948	0.0297315	0.0106613	0.0657933	0.0245612	-0.0180958	-0.016303	0.058723	0.0261617	-0.0086266	0.0454455	0.0190309	0.0272373	-0.00221529	-0.0115015
TCGA-BR-8686-01	0.035462	0.0108237	0.0326558	0.0764691	0.044724	-0.0295175	0.0565976	-0.0354855	-0.0162372	-0.0454696	-0.00751522	-0.018774	-0.0142339	-0.0319422	0.00406789	0.0296322	-0.00576522	-0.0257359	-0.00901086	-0.0135551
TCGA-HU-A4H0-01	-0.0616201	0.132466	0.0111251	0.00351441	0.064923	0.00956858	0.0426202	-0.0379137	-0.0236328	0.00678988	0.0363856	0.0169122	0.113335	0.0399409	0.00684429	0.0676168	0.0333975	0.0364698	0.0815066	-0.038762
TCGA-VQ-A91Y-01	0.0448634	0.0353504	0.00875146	0.0187015	0.0197298	-0.014188	0.0179144	-0.0676239	-0.0632346	-0.0594833	-0.0314516	-0.0356225	-0.045312	-0.0980472	-0.0367014	-1.66712e-05	-0.0453593	-0.0775892	-0.0339967	-0.0186349
TCGA-HU-A4H3-01	-0.0498265	-0.00731992	-0.0334776	-0.0389595	-0.0318099	0.0483418	0.036824	0.0216055	0.0371038	0.0525964	-0.0118487	0.0325749	0.00800452	0.0340259	-0.0188824	-0.0510902	-0.0326901	0.00287216	-0.00618019	-0.0389635
TCGA-HF-A5NB-01	-0.0730143	-0.00188449	-0.0105186	-0.0432504	-0.0350207	0.0253607	-0.00353797	0.0082116	0.0532761	0.00523572	-0.013921	-0.00747724	0.0412083	0.0779997	-0.0144081	-0.0381573	-0.0401706	0.0345715	0.00603664	0.0247131
TCGA-BR-8380-01	0.0700812	-0.0632279	-0.0276607	-0.0288643	-0.0399924	-0.0406742	-0.063811	-0.046398	-0.0253977	-0.0868378	-0.0245046	-0.0521983	-0.0642683	-0.168117	-0.0426468	-0.0545285	-0.0547916	-0.0606232	-0.0387208	-0.0122405
TCGA-BR-8284-01	0.0203119	-0.00121072	0.0208462	0.0499455	0.0587589	-0.0293788	-0.0383922	0.00680559	0.00157114	0.013519	-0.0253064	0.0219629	0.0262321	0.00891503	-0.0120913	-0.0306819	-0.032038	0.0205386	-0.00964466	0.00352465
TCGA-VQ-AA6K-01	-0.0092985	0.00259697	-0.0155532	-0.0210474	-0.0333555	0.00276547	0.00634816	-0.0300835	-0.071249	-0.0434886	-0.0139591	-0.0104639	-0.0175653	0.0233585	-0.0283889	0.0311286	-0.0296807	-0.0234197	0.0572656	0.0113348
TCGA-BR-8591-01	-0.0236394	0.0430793	-0.00269606	0.00225031	0.00357567	0.0011866	-0.00423306	-0.0291133	-0.0218296	-0.0156892	-0.00948492	-0.0156452	0.0631541	0.0358582	-0.00786748	-0.0152705	-0.0369416	0.0322772	-0.00507232	-0.0276606
TCGA-BR-A4PF-01	-0.0575181	0.0534517	0.00865704	-4.68665e-05	0.0278601	-0.02234	0.0585268	-0.0464081	-0.0116381	-0.000501144	-0.0100459	0.19136	0.0780849	0.0435216	-0.0422722	0.0133338	0.0217267	-0.0317567	-0.0579047	-0.0430456
TCGA-BR-8058-01	0.0563196	0.0150987	0.0545269	0.0830332	0.0760506	-0.0185437	-0.061934	-0.00587499	-0.0301535	-0.0260198	-0.0210118	-0.0161163	-0.0100811	-0.00405785	-0.0356611	-0.0246394	-0.0262801	-0.00495249	0.00511846	0.00576265
TCGA-BR-A4IV-01	0.105962	-0.0698473	-0.0358416	-0.0225999	-0.0395552	-0.0526029	0.00593966	-0.0502495	-0.0295879	-0.0564735	-0.037298	-0.043574	-0.0993376	-0.200872	-0.0554127	-0.0808847	-0.074017	-0.10706	-0.0777167	-0.0499579
TCGA-HU-A4GC-01	-0.04476	-0.0286656	-0.0335609	-0.0365458	-0.0441848	-0.0161716	0.042248	0.0365514	0.00494134	0.0693681	-0.0213001	0.0300394	-0.0190527	0.0458642	-0.0298147	-0.00707439	0.0548143	-0.0142144	-0.0295302	0.108485
TCGA-BR-8683-01	0.0424653	0.0405674	-0.00263998	-0.0179618	-0.0300494	0.0165218	0.0090818	-0.105984	-0.0903073	-0.0998261	0.00179377	0.00632805	-0.0034172	-0.0190341	0.301197	0.070404	-0.0236038	-0.0500581	-0.0388634	-0.0367796
TCGA-BR-A4J4-01	-0.0321035	0.0161996	-0.00240029	-0.0273515	-0.00680149	0.0719581	0.0250093	-0.0434834	-0.0450694	-0.0145497	0.069083	0.00468992	0.0019567	0.0148306	-0.0280999	0.0171578	-0.0173785	-0.0184088	-0.0330415	-0.0455976
TCGA-HU-8608-01	-0.00243225	0.210771	0.0873501	0.126974	0.154973	-0.0237374	0.0369254	-0.062023	-0.0589476	-0.055686	-0.0133123	-0.022004	0.0965576	0.0166093	-0.0108242	0.0300358	0.00570637	0.023019	0.000990167	-0.0320273
TCGA-VQ-AA6J-01	-0.0131738	0.0248554	0.0259131	0.0318671	0.0294405	-0.01927	0.0344495	-0.0174113	-0.0104877	-0.0164789	-0.00405484	0.0584566	0.0355172	0.0213862	0.0189159	0.0396727	-0.00890805	0.00157088	-0.0585088	-0.0458338
TCGA-BR-A4J5-01	0.0785458	-0.0510535	-0.0175622	-0.0170549	-0.0169051	-0.0186114	0.0311768	-0.0113383	-0.0188115	-0.00692998	-0.0257395	-0.0381771	-0.0690816	-0.0889865	-0.0477976	-0.0773324	-0.0621808	-0.0760399	-0.0577161	0.0121356
TCGA-VQ-A8PU-01	-0.0589359	-0.0538778	-0.0301328	-0.055168	-0.0606033	-0.00463166	-0.00172281	-0.0315165	-0.0324195	-0.0325719	-0.00996655	-0.0117704	-0.0216557	0.0714275	0.0711861	0.0303476	-0.00603846	-0.00816088	-0.0405022	0.0656731
TCGA-BR-7959-01	0.0940226	-0.0120025	-0.00902045	-0.0234956	-0.010587	-0.00370833	-0.0385167	-0.0501204	-0.0190045	-0.0843958	0.00630789	-0.0361004	-0.0285	-0.0685091	-0.0389881	0.00153567	-0.00504223	-0.03297	-0.0254769	-0.0410969
TCGA-HU-A4GJ-01	-0.00785951	-0.0238005	0.235658	0.316562	0.0326967	-0.048421	0.0507476	-0.0267762	0.0546674	-0.0219371	-0.020264	-0.030177	-0.00134759	-0.0282549	-0.0269448	-0.0483455	-0.0529623	-0.0443658	-0.0197419	0.0316196
TCGA-BR-8485-01	0.0235762	-0.0304662	0.00382622	-6.38518e-05	-0.0255778	-0.0141033	0.0477547	-0.05972	-0.0372265	-0.0373958	-0.0159492	-0.0185678	0.0508863	-0.00759437	0.0100776	0.0985126	0.0452521	-0.0143796	0.00961892	-0.00473068
TCGA-BR-8080-01	0.0965763	-0.0367169	0.0145477	0.0309225	0.0126789	-0.018917	-0.0408355	-0.0275633	-0.0243837	-0.0624692	-0.0218764	-0.0315413	-0.0340227	-0.0720485	-0.041733	-0.0322121	-0.0331869	-0.0215132	-0.0196549	-0.0162759
TCGA-VQ-A8PM-01	0.00302761	-0.0185744	0.0180288	0.0471272	-0.0133302	-0.0288748	-0.00159842	-0.0400396	-0.0506554	-0.0221236	-0.0103509	-0.00970638	-0.0287817	0.00689038	-0.026182	0.00340197	-0.0442425	-0.0502741	-0.0039272	0.0386266
TCGA-B7-A5TI-01	0.0252302	-0.0438613	-0.0183372	-0.0146558	-0.0218457	-0.00285579	-0.0422621	0.0265064	-0.00143703	0.0270416	-0.00961609	0.0203743	-0.000556311	0.0446975	-0.00191636	-0.0114506	-0.0146871	0.0215515	0.00699971	0.0352848
TCGA-CG-4438-01	-0.0439171	0.0322148	0.00306488	-0.0026258	0.03127	0.00111458	0.058459	-0.0716376	0.00224185	0.00924928	0.00179937	-0.050382	0.0638089	0.0225305	-0.00477502	0.0734356	0.0848177	-0.0494563	-0.0103773	-0.00766335
TCGA-BR-4368-01	-0.0151792	-0.00658164	-0.00060137	0.0142226	0.016781	0.0110332	-0.0153895	-0.0741969	0.0310448	-0.0121701	-0.0305367	-0.0210843	0.057256	-0.0279144	-0.000491023	-0.0458432	-0.068932	-0.0338887	-0.0614993	-0.0413816
TCGA-HU-A4GY-01	0.0566326	0.00541279	0.0838887	0.160432	0.102185	-0.049546	0.0699438	-0.0560082	-0.00817362	-0.0404137	-0.031033	-0.0417773	-0.0479942	-0.0493183	-0.0342363	-0.0604269	-0.0571114	-0.0902221	-0.061955	-0.0431898
TCGA-CG-5721-01	-0.00259072	0.207818	0.0539148	0.0812824	0.171049	0.00419406	-0.0615626	0.0872768	0.043131	0.0108694	-0.0209516	-0.0159836	0.00236509	-0.00475302	0.00348249	-0.0406828	-0.00338348	0.0695017	0.0377811	-0.0581315
TCGA-BR-8059-01	0.0547837	-0.0719083	-0.0335463	-0.0461013	-0.0396494	0.0172416	-0.0579988	0.0415365	0.0885586	0.0254309	-0.00295304	-0.00278064	-0.0438269	-0.0293112	0.00189544	-0.0259015	-0.038373	0.000517188	-0.00771551	-0.0304369
TCGA-VQ-A8PF-01	0.0187924	0.112392	0.0610677	0.104004	0.135265	-0.024447	0.0115472	-0.0456219	-0.0562285	-0.0499195	-0.0153803	-0.00515393	0.0213582	0.00983516	-0.016779	0.0197479	0.00209411	-0.000797724	-0.00591285	-0.0018443
TCGA-F1-A448-01	0.0312112	-0.0337665	0.0129427	0.0144062	0.0164386	-0.00419098	-0.0106234	-0.00948013	-0.0265608	-0.000150598	-0.0256199	-0.0302162	-0.0306584	0.01059	-0.0357417	-0.0578011	-0.059688	-0.02636	-0.0383937	0.0405682
TCGA-BR-6709-01	0.117604	0.0535113	0.0865257	0.0925061	0.201634	0.00779932	-0.0771489	0.0132219	-0.0224651	-0.0419547	-0.0122347	-0.0113606	-0.000986916	-0.0618542	0.010162	-0.0148142	-0.0153173	0.0474027	0.000127322	-0.0438544
TCGA-D7-8576-01	-0.0157344	-0.00910299	-0.00702189	-0.0231077	0.0102245	-0.000324498	-0.0402589	-0.00433809	-0.0642979	-0.0263322	-0.0126221	0.00893869	0.0178206	0.0481606	0.0185083	0.108946	-0.0169463	0.0380299	0.0209999	0.167896
TCGA-D7-A4YU-01	-0.00739777	0.176774	0.0664166	0.100909	0.0593902	-0.00852535	0.0422909	-0.0634081	-0.0344558	-0.039743	-0.0132089	-0.00845013	0.0674923	-0.0255611	0.0225175	0.0328605	0.0222041	-0.00719607	0.00504651	-0.0360413
TCGA-VQ-A8DT-01	-0.0816115	-0.0336254	-0.0387997	-0.048975	-0.0513364	0.00250504	0.00867907	0.0128227	0.0254715	0.0490661	-0.0163429	0.0789364	-0.00320005	0.0685929	-0.0174668	-0.0502578	-0.0381965	-0.0119931	-0.0167936	0.0951481
TCGA-BR-8677-01	0.0875671	0.109891	0.00771601	0.037818	0.0281242	-0.000790954	0.0458177	-0.00234814	0.00637881	-0.0224072	-0.0119801	-0.0179018	-0.019079	-0.036156	-0.00715611	-0.00802758	-0.00135995	-0.0174693	-0.0111421	-0.0367463
TCGA-D7-8570-01	0.0240791	0.0086027	0.0462962	0.0711835	0.187393	-0.04201	-0.0220846	0.0203995	-0.0288925	-0.0277693	-0.0237141	-0.00914692	-0.0331371	-0.000175012	-0.0214075	0.0210131	0.0385844	-0.00191981	0.0898034	-0.0126976
TCGA-BR-A44U-01	-0.0352135	-0.0359507	-0.0616931	-0.0618146	-0.0637816	-0.0283194	0.0830511	0.0346697	0.078206	0.0725509	0.154615	0.0355962	-0.0468193	0.0147672	-0.048062	-0.0649551	-0.000817817	-0.0173285	-0.0574068	-0.0263951
TCGA-BR-8367-01	0.0299153	-0.051205	-0.0127602	-0.0196189	-0.0229259	-0.0155919	-0.0329627	-0.0804644	-0.0528781	-0.0818359	-0.0236543	-0.0409825	-0.00849114	-0.0330256	-0.0355934	-0.0236561	-0.0607648	-0.0421793	-0.05558	0.0524462
TCGA-BR-8371-01	0.0302924	-0.0553463	-0.0139646	0.0123657	-0.0441734	-0.0542063	-0.0138802	-0.00285807	0.0369087	-0.0433465	-0.0350819	-0.0471365	-0.100746	-0.214506	-0.0407065	-0.0799041	-0.0499305	-0.0815928	-0.0469092	-0.0296605
TCGA-BR-8369-01	-0.0118217	-0.0523375	-0.0318877	-0.0354902	-0.0652834	-0.0106868	0.0211514	-0.0667219	-0.0376183	-0.0541322	-0.0188923	-0.0424169	-0.01546	-0.0423691	-0.0202479	-0.00464205	-0.0442721	-0.0376433	-0.0396304	0.110143
TCGA-BR-6705-01	0.218069	-0.0350531	-0.00357991	0.00587745	-0.00391845	-0.0182767	-0.0811624	0.0304574	-0.00952289	-0.070381	-0.0215735	-0.00753947	-0.0699031	-0.095941	-0.018222	-0.0355056	-0.02808	0.00863361	0.011802	-0.0420828
TCGA-BR-7723-01	0.0315731	-0.0656773	-0.00773017	-0.00593177	-0.00493629	-0.038974	0.00542539	-0.0541502	-0.0135839	-0.0538403	0.0143579	-0.0206428	0.0813993	-0.0279917	0.0777943	0.21636	0.0117224	0.0351363	0.084042	-0.0533281
TCGA-D7-A6EY-01	-0.0155926	0.100034	0.0355734	0.0462865	0.0363351	0.00591516	-0.027225	-0.0128215	-0.00577674	-0.0244768	-0.0121547	-0.0260246	0.0161559	0.00802814	-0.010537	-0.0267131	-0.0418905	0.0165635	-0.0142597	-0.0431627
TCGA-VQ-A8PE-01	-0.02309	-0.00221792	0.00245641	-0.0131951	-0.0346707	0.00890799	0.0994938	-0.0164553	-0.008656	-0.00234356	-0.0193499	-0.0243942	0.0967184	0.0213093	0.0794815	0.110368	0.0968278	0.0681312	0.0596101	-0.0273811
TCGA-BR-8676-01	-0.0816463	-0.021492	-0.0344605	-0.00649764	0.0110374	-0.0605904	0.171785	0.0799627	0.200295	0.21411	-0.028836	-0.0136555	0.0279953	0.00134663	-0.0213096	-0.0622565	0.00740441	0.00374964	-0.0131798	0.00376992
TCGA-BR-A4J8-01	0.0135901	-0.00643948	-0.0317781	-0.0301337	-0.0411906	-0.0325276	0.0727889	0.0310906	0.0109313	0.0085978	-0.0261609	0.0136977	-0.0729632	-0.0306048	0.0653894	-0.0334837	0.0710378	-0.0520128	-0.0125072	-0.0347721
TCGA-CG-4469-01	-0.065638	-0.00300035	-0.0192521	-0.016096	0.00578901	-0.0141359	0.0700479	-0.0780356	0.0466783	0.0212832	-0.010509	-0.0052048	0.0544316	0.0392825	-0.0300789	-0.0093513	-0.00132797	-0.065849	-0.0720077	-0.00446594
TCGA-RD-A7BT-01	-0.0667374	-0.0420859	-0.0467732	-0.0520348	-0.0551821	-0.0262264	0.0133371	0.0411688	0.0948099	0.103132	0.308478	0.065263	0.0588575	0.0461704	0.0867325	0.0497855	0.0973537	0.0382078	0.0408818	-0.0203346
TCGA-VQ-A91Q-01	0.0290039	-0.0165965	-0.018587	-0.0451597	-0.0493077	0.0204715	0.0307438	-0.0782443	-0.0809581	-0.0761122	-0.00999251	0.0322157	-0.0159162	-0.00254886	-0.0512056	-0.0102492	-0.0462957	-0.0326752	-0.033531	0.0287029
TCGA-IN-A7NU-01	0.00126284	0.0280482	-0.0106771	-0.0329747	0.00547738	0.0881721	0.00226984	0.0749925	0.0486152	0.0711798	-0.00043191	0.0300525	-0.0683434	0.00306419	-0.0393847	-0.0424966	0.017365	-0.0238129	-0.0522893	-0.0114803
TCGA-FP-A4BF-01	0.0546928	0.0779519	0.0205374	0.0616793	0.119634	-0.015079	0.0684453	0.0367202	0.0421686	0.0666672	-0.0280059	-0.0273582	-0.0327462	-0.0212954	-0.0270667	-0.0415622	-0.0293138	-0.0334223	0.0426875	-0.0314095
TCGA-D7-A6EX-01	-0.027903	-0.0776458	-0.0340346	-0.0546129	-0.0680488	-0.0239238	0.0410256	0.0498918	0.123902	0.0191645	-0.0230823	-0.00562284	0.00569072	-0.0398172	-0.0169442	0.00720205	0.0799412	0.0140176	-0.0208661	-0.0678212
TCGA-RD-A8MV-01	-0.0234702	0.0934524	0.0303881	0.0542863	0.0357907	-0.00581608	0.0219723	0.00138194	-0.0175902	-0.00427903	-0.0211264	0.00744849	-0.0314653	0.0191851	0.0205742	0.0290362	-0.0264107	-0.0275327	-0.0333721	0.0201382
TCGA-VQ-A91X-01	-0.0777792	-0.0494374	-0.0474026	-0.0689531	-0.0778764	-0.0234281	0.0781426	0.00128362	0.073542	0.0418563	0.534463	-0.00862685	0.0181678	0.0414634	0.00965156	0.0316168	0.00769417	-0.0168467	-0.0434121	-0.0484938
TCGA-VQ-A8E0-01	-0.0428143	-0.000127151	-0.00556388	-0.032103	-0.00733001	-0.0211292	-0.0172882	0.0108924	-0.0651814	0.0342902	-0.00470081	0.299745	0.00892828	0.0687295	0.0302987	0.0164329	-0.0362814	0.0320251	-0.0260492	0.00943685
TCGA-MX-A5UJ-01	0.00578782	-0.0150071	-0.0259663	-0.03064	-0.032977	-0.0147186	-0.0156767	0.027664	0.0265005	0.0138633	-0.0170583	-0.0215901	-0.0106296	-0.0189478	-0.0121682	-0.0426675	-0.0196607	0.0154672	0.00337071	0.0178321
TCGA-D7-8575-01	-0.0242119	9.64423e-07	0.0228166	0.0140623	0.0300215	0.0347844	-0.0404418	-0.0917165	-0.04609	-0.0957016	-0.0154778	0.148469	-0.0429553	0.0255603	-0.0192345	-0.00522907	-0.0719978	-0.0566165	-0.0370193	0.107174
TCGA-RD-A8N1-01	0.00640958	0.00235105	0.047182	0.0728246	0.0337129	-0.0242447	0.0313634	-0.0302225	-0.0450466	-0.0486789	-0.0251075	-0.0180583	-0.0196313	0.00409333	0.0121998	0.00598065	-0.0302014	-0.0252325	-0.0441082	0.00134154
TCGA-BR-6802-01	-0.0106985	0.157547	0.0202144	0.00674536	0.0244087	0.0599258	-0.0696581	0.0343018	-0.0393434	-0.0220257	-0.0136385	-0.0108652	-0.00857174	0.0401277	-0.013902	-0.0357071	-0.0258295	0.0474342	0.0123744	-0.00468387
TCGA-VQ-A94T-01	-0.0459706	-0.0716994	-0.0348	-0.067587	-0.0675195	0.0032576	0.0208287	-0.0243508	0.0434594	-0.00955932	-0.0248451	0.00745226	0.0644301	0.0340853	-0.0185507	0.0229984	-0.00307411	0.0188007	0.0242471	0.00411066
TCGA-RD-A8N0-01	0.00430684	-0.0285278	0.0388995	0.127586	-0.00179272	-0.0413552	0.0404001	-0.0472839	0.0115828	-0.0246281	-0.0301294	-0.0458391	-0.0616963	-0.0251646	-0.0544241	-0.0778696	-0.0782697	-0.0974336	-0.0745714	0.0799631
TCGA-R5-A805-01	-0.0100143	0.0186993	0.00906114	0.00523988	0.0312102	-0.00219925	-0.0362282	-0.0473026	-0.0604389	-0.0362851	-0.0210753	-0.0398074	-0.0522371	0.014905	-0.0412709	-0.0621831	-0.0552277	-0.0770182	-0.0615755	0.17472
TCGA-BR-6564-01	0.10428	0.0136404	-0.0166353	-0.00192874	0.00367354	-0.0343149	-0.105606	0.0579898	-0.00171319	-0.0508573	-0.0276106	0.0370072	-0.118464	-0.171947	-0.0140867	-0.0519565	-0.03073	-0.0184162	0.00439247	-0.0213271
TCGA-RD-A8MW-01	0.0344559	-0.014629	0.0142085	0.0379001	0.0724685	-0.0187362	0.0341595	0.0416195	0.0149589	0.0555458	-0.0256136	0.272871	-0.0256303	-0.0178843	0.00196825	-0.0164326	-0.000181333	-0.0151975	-0.00934542	-0.0432912
TCGA-D7-5578-01	0.0265122	-0.00493597	0.0101455	0.010095	0.0134489	-0.00668613	-0.0802574	0.0971184	0.0316758	0.0227604	0.00327832	0.0272072	0.00512729	0.0307743	0.00109433	0.0234314	0.062609	0.175939	0.0845544	-0.00450632
TCGA-D7-A6EZ-01	-0.0226824	0.106701	0.00476658	0.0109265	0.0817449	-0.0324807	0.00206644	0.0365867	-0.00697586	0.0402488	-0.019353	-0.00691551	0.0626922	0.0240852	0.0142218	0.0453403	-0.000949258	0.0697077	0.0305747	-0.0464541
TCGA-RD-A7BS-01	0.00566742	0.0244433	-0.0140296	0.0019626	-0.0161525	0.130224	-0.0416342	0.0352388	0.0427774	0.0408268	-0.0199699	-0.0256392	-0.0681671	-0.0111283	-0.040264	-0.0783353	-0.055546	-0.0554674	-0.00538626	0.0564078
TCGA-BR-8381-01	0.0225252	0.0590136	0.0353067	0.0950305	0.0865041	-0.0219266	0.0320632	0.00478636	0.0561081	0.0122633	-0.0192779	0.00698461	0.0358843	-0.00964287	-0.0120796	0.00547762	0.00388244	0.0060166	-0.00332331	-0.0319943
TCGA-CD-8535-01	-0.0224381	-0.033123	-0.0179734	-0.0584687	-0.0462653	0.0191609	0.011171	-0.0261191	0.00320419	-0.00935136	-0.0108445	-0.00573143	0.0773244	-0.01333	-0.0248781	0.136781	0.160607	0.0305469	0.0934716	-0.0389344
TCGA-HU-A4GD-01	-0.0708601	-0.0400992	-0.0523373	-0.0610779	-0.0743777	-0.0336677	0.156701	0.011858	0.0254982	0.052749	0.00773005	-0.038116	-0.0122877	0.0243902	-0.0548896	-0.0117733	0.0140731	-0.027159	0.0170092	-0.0344847
TCGA-CG-5734-01	-0.00795323	0.0294566	0.0155969	0.0479902	0.0637583	-0.000687869	-0.106028	0.0959848	0.00351787	0.0147859	-0.0241945	-0.0218458	-0.0999289	0.0410922	-0.0211395	-0.0591905	-0.0101915	0.000907129	0.0142066	0.256397
TCGA-HU-A4GU-01	-0.0557361	-0.0120938	-0.0221708	-0.0453534	-0.0480641	0.0141024	0.0335201	-0.0300637	-0.0375898	-0.0062654	-0.00212308	-0.039345	0.0748604	0.0530469	-0.0419555	0.0416028	0.0552957	0.0396641	-0.0568262	-0.0490648
TCGA-RD-A8N4-01	0.0171924	-0.043548	-0.0356917	-0.00883316	-0.0399396	-0.0606802	-0.0341398	-0.0374107	-0.0338997	-0.0508637	-0.0377267	-0.056225	-0.100016	-0.220754	-0.0530752	-0.0779482	-0.061554	-0.0999996	-0.0711885	-0.0413252
TCGA-CG-4475-01	0.0369865	-0.0511982	-0.0223947	-0.0287371	-0.00671806	-0.0117051	-0.0138378	-0.0689935	-0.0574775	0.0279765	-0.0137978	-0.0498932	0.0119593	-0.000615465	-0.0290205	0.0111371	-0.0293644	-0.0494089	-0.00892328	-0.00378494
TCGA-BR-6455-01	-0.0124925	-0.000454967	0.0258644	0.0221013	0.0207729	-0.0233695	-0.0216933	0.0324756	0.0376331	-0.0021689	-0.0134626	-0.0132096	0.0912506	0.0217266	0.0403642	0.0602069	0.0726295	0.113073	0.0568052	0.0268205
TCGA-VQ-A923-01	-0.00673277	0.0800323	0.0443327	0.0767089	0.0294772	-0.0188818	0.103635	-0.0578259	-0.0675659	-0.0602076	-0.00181691	0.00874756	0.00203936	0.0170632	-0.0237985	0.03867	0.00286909	-0.0366682	0.0419019	0.0193082
TCGA-CD-8525-01	0.00177887	0.061497	-0.00420786	0.00685118	0.0029972	-0.0164372	0.0765895	0.0985428	0.0651608	0.126992	-0.0102994	0.00537545	-0.0119653	-0.00209386	0.00411872	-0.00714261	-0.00215012	0.00372241	0.0219083	-0.0241016
TCGA-VQ-A8PC-01	-0.0092953	0.0611301	0.0191393	0.015556	0.0145424	0.000459757	0.0277409	-0.0675178	-0.0601978	-0.0434383	0.0315619	-0.0219153	-0.014239	0.0187806	-0.0272874	0.0272373	-0.00375823	-0.0426416	-0.018242	0.0428313
TCGA-BR-4253-01	-0.0527666	0.213688	0.0621884	0.134321	0.246951	-0.0259268	0.0456558	-0.0660893	0.0157691	0.0499388	-0.0252983	-0.0421727	0.107827	0.0279947	-0.027988	-0.0513095	-0.0486775	-0.0565017	-0.0301846	-0.0284279
TCGA-BR-6563-01	0.096997	-0.0278445	0.0232425	0.0879679	0.05689	-0.0391633	-0.0674527	0.0429432	0.0843575	-0.00952869	-0.0269028	-0.0393803	-0.092397	-0.0517127	-0.0354144	-0.068033	-0.0252136	-0.0528327	-0.0394721	0.0306686
TCGA-HU-A4G8-01	-0.0597459	0.112067	-0.00337261	-0.00753975	-0.0100104	-0.00640087	0.0562687	-0.0327445	0.00745193	0.0208086	-0.015257	-0.0291721	0.0988896	0.0452344	-0.00655678	-0.0361749	-0.0524229	0.00485099	-0.0199531	-0.0371706
TCGA-HU-A4G2-01	-0.0328857	-0.0160622	-0.0365646	-0.0144688	-0.0217441	-0.0349259	0.0363845	0.0101699	0.126456	0.0915591	-0.0235107	-0.0256309	0.00606362	0.0354397	-0.0405057	-0.0513082	-0.0212387	-0.0511045	0.0286773	0.167619
TCGA-MX-A5UG-01	0.124315	-0.0258819	0.0651185	0.0868556	0.0182046	-0.0165842	-0.0318925	-0.0808783	-0.0553469	-0.100454	-0.0153807	-0.0465896	-0.0539279	-0.0738183	-0.0415134	-0.0323307	-0.0619658	-0.0751358	-0.0444703	-0.0103061
TCGA-BR-7722-01	0.0029343	-0.0100452	-0.0154836	-0.0101068	-0.0106055	-0.00200522	0.0418089	0.044408	0.00753952	-0.0114525	-0.0152976	0.000925355	-0.0888219	0.0214032	-0.0160535	-0.0313143	0.0127711	-0.0251437	0.00776222	0.109839
TCGA-IN-A7NT-01	0.0100364	0.00815611	-0.00707172	-0.0431195	-0.0240931	0.14371	0.028955	0.0247065	-0.00951938	0.0736579	-0.0114236	0.0645761	0.054367	-0.0315489	0.0282041	0.0145689	0.00777963	0.0342543	-0.0125188	-0.0556894
TCGA-FP-8210-01	0.119751	-0.0141639	0.0537353	0.108356	0.0382902	-0.032098	-0.0466384	-0.0292767	-0.00253598	-0.0639837	-0.0255363	-0.0393377	-0.0644457	-0.102163	-0.0343659	-0.0496674	-0.0529076	-0.0637897	-0.0436542	-0.0183816
TCGA-IN-7806-01	-0.0372362	-0.0280837	-0.0171061	-0.0349462	-0.0575524	0.0236926	0.0156548	0.00680923	0.0301111	-0.043263	0.0105808	0.00720571	-0.00573139	0.0242054	0.0123595	0.0485581	0.0692869	0.0489431	0.0400909	-0.021921
TCGA-CD-8526-01	0.0181421	-0.00710846	-0.00389313	0.000130295	-0.0168792	-0.0162054	0.0693083	0.0140844	-0.0293879	0.0122353	-0.0110979	-0.00505187	0.0848332	-0.0141479	0.0390227	0.111887	0.108652	0.0923328	0.263115	-0.0436905
TCGA-CD-A487-01	-0.00612042	0.000587342	-0.0430059	-0.0461055	-0.0478281	-0.0244783	0.117061	0.0506513	0.0580138	0.0998826	-0.0162928	-0.0297282	-0.00269335	-0.0297986	-0.00777455	-0.0146646	0.0170354	-0.0187568	0.0327237	-0.0382864
TCGA-D7-A4YX-01	-0.0536527	0.11023	-0.00559101	-0.00676839	0.021854	0.00781017	0.0392718	-0.0122489	0.0484251	0.00492595	0.0599096	0.0335717	0.0800353	0.0417	0.00175238	0.0253566	0.0239178	0.0395762	-0.00944749	-0.0483055
TCGA-CD-A48C-01	-0.00598321	-0.0389742	-0.0312014	-0.0396476	-0.0343137	0.00744531	0.0361583	0.0600431	0.056668	0.101992	-0.0280207	0.0615101	-0.0157957	0.01641	-0.00814873	-0.00147035	-0.0132698	-0.0237998	0.0308409	0.00915167
TCGA-RD-A8NB-01	-0.00226813	0.084391	0.0065265	0.0184345	0.00972939	-0.00257978	0.00471757	-0.0469847	-0.0474004	-0.0307295	-0.0166129	-0.0351476	0.0262317	-0.0166551	-0.0272087	-0.0343709	-0.0544033	-0.0181533	-0.031311	-0.0300569
TCGA-IN-A6RR-01	-0.050612	-0.0315928	-0.0309056	-0.0296939	-0.0510823	0.0176905	0.0439066	0.0562216	0.0511079	0.0903505	0.00120385	-0.00747538	-0.0392082	0.0519504	0.0259566	-0.0389621	-0.00293328	-0.0149073	0.0269405	0.161665
TCGA-BR-6458-01	0.0608876	0.00482776	0.0226669	0.0181155	0.0636316	-0.0116128	-0.0438647	-0.00452714	-0.0537429	-0.0522499	-0.0217966	0.0414473	0.00520004	-0.00550105	0.00964238	0.0661133	0.096096	0.0393176	0.0895698	-0.000233787
TCGA-CD-8531-01	-0.00643407	-0.04884	0.775753	0.077325	0.0663995	-0.0472571	-0.0113955	0.0444694	0.0607091	0.0235516	-0.0270948	-0.0171094	0.055546	-0.0469057	-0.000288358	-0.0377226	-0.04524	0.0236428	0.0265046	-0.058143
TCGA-CD-5801-01	-0.0228978	0.0749047	0.018328	0.0499285	0.106881	-0.00155337	-0.0363238	0.132413	0.0694147	0.0622809	-0.00437484	0.0869918	-0.0457332	0.0285668	0.00453441	-0.0241756	0.0357347	0.0676102	0.0943162	0.0231302
TCGA-D7-A747-01	0.0202743	-0.0514427	-0.0183549	0.00381334	-0.0295918	-0.0578926	-0.0389359	-0.0301183	-0.00120384	-0.0283919	-0.0340075	-0.0422412	-0.0959528	-0.178742	-0.0567083	-0.0714466	-0.0507456	-0.0974664	-0.0786364	-0.0434637
TCGA-D7-6521-01	0.0555881	-0.0375335	0.0119932	0.0296267	0.0526557	-0.0269168	-0.0820571	0.0600357	-0.0273261	-0.0174938	-0.0244935	0.144168	-0.0674794	0.00129922	-0.0317883	-0.025166	0.011304	0.0259898	0.0642844	-0.00985481
TCGA-CG-4444-01	-0.0283117	-0.0284393	-0.00416551	0.0162629	0.000809044	-0.0257439	0.0269273	-0.0590865	0.0134674	0.00501615	-0.000356369	-0.0373222	0.0598615	0.0265479	-0.0239318	0.00116538	-0.027521	-0.038261	-0.0281619	-0.00184923
TCGA-D7-6520-01	0.0534495	0.0667869	-0.00392297	-0.0151108	0.0305018	0.027441	-0.102303	0.0631128	-0.0967805	-0.0189472	-0.00905781	0.0339976	-0.0435647	0.0117096	0.00048983	0.0707465	0.0634386	0.0684923	0.108607	-0.0148056
TCGA-KB-A93J-01	-0.0378908	0.0430944	0.0236474	0.0273891	0.0813062	0.00168628	0.000875592	-0.00206782	-0.100182	-0.00272874	-0.0031026	0.0140506	-0.0115856	0.0674025	0.0461271	0.0156278	0.0116925	0.0321839	0.0539478	0.084062
TCGA-CG-5717-01	-0.0177358	-0.0071965	-0.00901637	-0.00665288	-0.0272077	0.436706	-0.0829211	-0.0109039	-0.0327487	-0.0513406	-0.0199505	-0.0392597	-0.0616666	-0.0164305	-0.0275539	-0.0585886	-0.0400673	-0.0369684	-0.0317724	-0.0349959
TCGA-CG-4305-01	-0.00501287	-0.0256958	0.0125606	0.0236289	0.0653357	0.00902813	0.00392473	-0.050176	-0.0244845	-0.0020024	-0.0201146	-0.00330155	0.0243607	0.02467	-0.01938	-0.0172126	-0.0105552	-0.0355901	-0.0558065	-0.00966751
TCGA-BR-4279-01	0.0775281	-0.034185	-0.00634971	0.0470898	0.0937365	-0.0336824	-0.0797857	-0.0464008	0.0746332	0.052591	-0.0376377	-0.0523353	-0.0258653	-0.0456707	-0.039516	-0.0879448	-0.0588439	-0.101809	-0.0950939	0.064498
TCGA-D7-8574-01	0.0934853	-0.0123094	0.0944825	0.172051	0.0390405	-0.049845	-0.000703339	-0.0408491	0.00906845	-0.0764373	-0.0114063	-0.0303089	-0.0681813	-0.062477	-0.0382223	-0.0396291	-0.0497864	-0.0730109	-0.0495734	-0.0309254
TCGA-D7-6818-01	0.0914376	-0.0188194	0.0274268	0.00319763	0.0730847	-0.0326277	-0.103325	0.0612887	-0.0432739	-0.0369025	-0.011449	-0.0211749	-0.0350633	-0.0270823	0.0455628	0.0204035	0.0591441	0.0546263	0.0964557	-0.0276671
TCGA-BR-8060-01	0.0414985	-0.0302626	0.00517875	0.00623627	0.0242137	-0.0481569	-0.0210127	-0.0351776	-0.0430968	-0.0341538	-0.0193886	-0.0226537	0.0354001	-0.0546681	0.0536529	0.0381408	0.0276248	0.0111972	-0.0187233	-0.0399129
TCGA-RD-A8N6-01	-0.0104348	-0.0334163	-0.0329545	-0.0316037	-0.0430528	-0.0320752	0.0761737	-0.0281562	0.0103338	-0.00327349	-0.00278345	-0.0371828	-0.0216271	-0.0522282	-0.0201863	0.0686859	0.0519166	-0.0394277	-0.0204385	-0.0421655
TCGA-HU-A4HB-01	-0.0323746	0.0269966	0.0839618	0.115772	0.0221553	-0.0268968	0.0220302	-0.0150869	-0.00296292	0.00326906	-0.0111141	-0.0159299	-0.0234368	0.0245465	-0.0260523	-0.0259177	-0.0462223	-0.0440243	-0.0430017	0.0971862
TCGA-D7-A6EV-01	-0.0646538	-0.0366714	-0.0187644	-0.053408	-0.0599898	0.0384568	0.0318239	0.01759	-0.0285753	0.0405058	0.0111689	0.192943	0.0849223	0.0670884	-0.00424495	0.0668214	0.0265415	0.082068	0.0050891	0.0116683
TCGA-D7-6525-01	0.036477	0.0737678	-0.013091	-0.0248997	0.0118787	0.095372	-0.0759322	0.0569856	0.00868465	-0.0213244	0.00285309	0.0605172	0.00242879	0.00895172	0.0287291	0.0316547	0.0951476	0.10461	0.0753759	-0.0456472
TCGA-D7-A4Z0-01	0.0119529	-0.0369705	0.00107428	0.00313412	-0.025741	0.0138119	-0.0107541	-0.0308713	-0.0504262	-0.024587	-0.0250939	-0.0408917	-0.064001	0.00192896	-0.0474302	-0.0687578	-0.072499	-0.0675858	-0.0612273	0.0749742
TCGA-HU-A4H4-01	-0.0424341	0.103848	-0.0066901	0.0106926	0.0144509	-0.0137618	0.0750841	0.0254835	0.0344949	0.0633428	-0.0204752	-0.0278352	0.0437676	0.0442358	0.0413023	5.11074e-05	0.0680787	0.0250274	-0.031794	-0.0443086
TCGA-IN-8663-01	-0.0209544	-0.0070868	-0.0115017	-0.0425349	-0.0592345	0.311091	0.040333	-0.0914098	-0.0732559	-0.0683567	-0.023408	0.05653	0.0448393	-0.0178924	-0.0072335	0.0203393	-0.0335136	-0.0255598	-0.0221173	-0.0643718
TCGA-BR-6453-01	0.0511412	-0.0260002	0.0837184	0.164747	0.0646266	-0.0353224	-0.0604237	0.0923674	0.0869245	0.0137022	-0.0185689	-0.0193489	-0.0654894	-0.0139612	-0.0036537	-0.0521401	0.0037707	0.0206669	0.00859206	0.00766123
TCGA-RD-A8N9-01	0.100368	-0.0208656	-0.0010596	0.0228278	0.015392	-0.037876	0.0162261	-0.0478993	-0.0249885	-0.0340461	-0.0260905	-0.0453873	-0.038423	-0.0499593	-0.0306546	-0.0273681	-0.0375026	-0.065274	-0.0107248	-0.00869851
TCGA-CD-5799-01	-0.012445	-0.0176782	-0.0347675	-0.053729	-0.0420091	-0.00088186	-0.0536869	0.114458	0.023897	0.0998812	0.116676	0.0892868	-0.00550749	0.0526863	0.0419255	-0.0164824	0.062058	0.10445	0.0588247	-0.0169968
TCGA-CG-5723-01	-0.0165332	0.147359	-0.00349133	0.0187441	0.137829	0.0145147	-0.0602345	0.114208	0.0861845	0.137564	-0.023044	0.00581312	-0.00115036	0.00877723	-0.00279112	-0.0683345	-0.0149811	0.0385841	0.0336724	-0.0403576
TCGA-D7-6524-01	0.125482	-0.0161364	0.0204065	0.0120853	0.0193607	0.0283477	-0.0751742	0.00939849	-0.0460484	-0.0510664	-0.0190855	-0.0225892	-0.0438267	-0.0177667	-0.0152545	-0.0386338	-0.0358037	0.000675423	-0.00478123	0.0186638
TCGA-D7-6519-01	0.000164736	-0.00614866	-0.00791158	-0.0358316	-0.0236695	0.0581639	-0.0513261	0.113555	0.0204304	0.0180096	-0.00953051	0.0567278	-0.0156564	0.0173276	-0.023202	-0.00573346	-0.0198104	0.0728126	0.0934677	0.00671288
TCGA-VQ-A91E-01	-0.0685816	0.00709176	-0.000590769	-0.0143424	-0.0365668	0.0108189	0.000165444	-0.0472114	-0.0664627	-0.0333784	-0.0131216	-0.0059796	0.0296611	0.066738	-0.0276214	0.00633287	-0.0290173	0.000980701	-0.0258732	0.063821
TCGA-BR-7958-01	0.0228117	0.150515	0.0454589	0.0896488	0.139304	-0.00138057	-0.0151099	0.0145372	-0.00561245	-0.0165954	-0.0194589	0.00624131	0.0109976	-0.00367507	-0.00972491	0.00200074	0.0129221	0.0141879	0.0705042	-0.0257632
TCGA-BR-8295-01	-0.0270186	-0.0812768	-0.0424698	-0.0604027	-0.0574955	-0.0408783	0.0433154	0.0384772	0.0258756	0.075887	-0.0187762	0.0132471	0.0976332	-0.00434361	0.0194096	0.0381349	0.0354441	0.122998	0.120158	-0.0138426
TCGA-HU-8602-01	-0.0406921	0.143816	0.0300343	0.0140056	0.0493393	0.0275216	-0.00497321	-0.0535787	-0.0042491	-0.0407404	-0.0133447	-0.0260768	0.156677	0.0208584	-0.00517708	-0.0139689	-0.0413709	0.04904	0.0208081	-0.0563675
TCGA-BR-7851-01	-0.0136551	-0.0391106	0.00127467	-0.0178743	-0.011881	0.0126657	-0.0299324	-0.0197452	-0.0373773	-0.0391864	-0.00836194	-0.0187739	0.0667854	0.0237157	-0.0092131	-0.00538134	-0.0284172	0.0373132	-0.0035422	-0.0301879
TCGA-BR-8682-01	0.0238747	-0.0355034	-0.00256236	-0.0096634	-0.0124191	-0.0102267	-0.0153493	-0.0882764	-0.0580839	-0.0934232	0.00855427	-0.0157234	-0.0478643	-0.0449236	-0.0387053	0.0227129	-0.052963	-0.05389	-0.0602976	0.0484337
TCGA-VQ-A94U-01	0.0245743	-0.028768	-0.0241967	-0.0279307	-0.0468781	-0.0239672	0.102447	-0.025488	-0.0120201	-0.0274163	-0.0239629	-0.034261	-0.00873985	-0.0116147	-0.00927101	-0.0163658	-0.0241873	-0.0182044	0.0233489	-0.0253426
TCGA-VQ-A8PO-01	-0.0344218	0.064021	0.0121361	0.00694381	-0.00125335	0.00743617	0.0318529	0.0199327	-0.00191712	0.0107864	0.00489479	-0.0167484	0.0597795	0.0429027	-0.0101674	-0.0335455	-0.032371	0.0630938	0.0167774	-0.0236212
TCGA-BR-8588-01	0.0188612	-0.00859927	-0.00599624	0.00588022	-0.00236574	-0.0277298	-0.0139718	-0.00640075	0.0210184	0.00998449	-0.0190616	-0.0357518	-0.0132848	-0.0134798	-0.0351924	-0.0588963	-0.0510716	-0.0331806	-0.046266	-0.023769
TCGA-BR-4361-01	-0.00469976	0.0421952	0.0016697	0.00909687	0.0641529	-0.0284206	0.0710078	-0.0623807	-0.00544257	0.0495734	-0.0303873	-0.0360096	0.0874832	0.0197955	-0.0378992	-0.0534979	-0.0501987	-0.0485711	-0.0665288	-0.0243549
TCGA-CD-8528-01	-0.0396837	-0.0542051	-0.0249157	-0.0516244	-0.0383567	-0.00142635	-0.021119	-0.023888	0.000532385	-0.0331387	-0.032516	0.00787621	0.0996316	0.0335599	-0.0284942	-0.00740396	-0.0224897	0.0575549	-0.00270893	-0.0106686
TCGA-BR-6852-01	0.0120112	0.204752	0.0536031	0.0660919	0.119984	0.0287573	-0.0600028	0.0487846	-0.0354019	-0.0125586	-0.00479384	-0.0116647	0.00699337	0.0252301	-0.000566134	-0.0169103	-0.0103175	0.0763833	0.0380464	-0.0553785
TCGA-VQ-A8E3-01	-0.051842	0.147238	0.00250978	-0.00210179	-0.00392367	-0.00645996	0.0400341	-0.0279218	0.018193	-0.00991143	-0.0101002	0.0447709	0.065639	0.0269837	-0.0241936	0.00561574	0.0663957	0.0190269	-0.0142963	-0.0509951
TCGA-VQ-A8P5-01	-0.0107106	0.00431616	-0.0265848	-0.0437649	-0.0240685	-0.00356586	0.0179062	-0.00160478	-0.0263532	0.0359732	0.0989006	-0.00143997	0.0464655	0.0222428	0.0224173	-0.0194344	-0.016143	0.0350692	0.0731925	-0.0357759
TCGA-BR-6454-01	0.00143567	0.0844429	0.0399873	0.0603373	0.0308146	-0.00840268	-0.0567494	0.0334468	-0.0530223	-0.0242455	-0.0034658	0.228809	-0.0185815	0.0282232	0.0227741	0.120666	0.0158121	0.0415406	0.0919366	-0.00858708
TCGA-CD-8534-01	-0.0236112	-0.00642418	-0.0281043	-0.0130177	-0.0340805	-0.039555	-0.00835042	-0.0155276	0.0446387	-0.0210876	-0.0222995	0.20028	-0.0448598	-0.0110085	-0.0274512	-0.0324661	-0.0395623	-0.0547339	-0.0244509	-0.0100562
TCGA-BR-8365-01	0.0876797	-0.0405868	-0.0107378	0.0190726	-0.00555457	-0.0407795	-0.06604	-0.0428421	-0.00501175	-0.0630404	-0.02959	-0.0253345	-0.076998	-0.168766	-0.03651	-0.0577739	-0.0557494	-0.0776196	-0.0516656	-0.0275533
TCGA-BR-6707-01	-0.0204773	0.0456539	-0.00447527	0.030127	0.0402123	-0.0420785	0.0208351	0.0901526	0.147613	0.0845977	-0.0185578	0.00496276	0.0287749	0.0181389	0.0195267	-0.00599555	0.0484833	0.0981089	0.0587281	0.00306621
TCGA-BR-7704-01	0.00299327	0.0703731	0.0305684	0.0564234	0.0926231	-0.0201803	0.0632379	0.146369	0.0411884	0.0936818	-0.01127	0.0481346	-0.00122387	0.00234506	0.0511171	0.0537638	0.230076	0.101323	0.0581994	-0.0348414
TCGA-MX-A663-01	0.109393	-0.0635682	-0.0262505	-0.0257927	-0.025854	-0.0255533	-0.0224223	-0.0106306	-0.0223241	-0.0448196	-0.0224068	-0.0165901	-0.0342874	-0.0729245	-0.0317325	0.0154947	0.00723906	-0.0241346	-0.00525373	-0.016802
TCGA-BR-6452-01	-0.0176262	-0.00556897	0.0111294	0.00624553	0.0143457	0.0136966	-0.0658327	-0.00779366	-0.0503089	-0.0231463	-0.0185288	-0.0121649	0.062537	0.0523145	-0.000302972	-0.00307717	-0.0135122	0.0728565	0.0247718	0.0157158
TCGA-D7-8573-01	-0.0563193	-0.0324205	-0.0160587	-0.0500426	-0.0508205	0.031714	0.0205166	-0.00719345	0.0206338	-0.0144898	0.151549	0.01043	0.0747301	0.0260981	-0.00426572	0.0492949	0.0355825	0.0366137	0.00645654	-0.0460279
TCGA-BR-A44T-01	0.00261918	-0.0393879	0.0808117	0.191833	0.0168359	-0.0616885	0.0421208	-0.00088959	0.0773444	-0.0104863	-0.0330998	-0.0428582	-0.089576	-0.124525	-0.0469197	-0.087937	-0.0605913	-0.0931301	-0.0586702	-0.0491799
TCGA-BR-8487-01	-0.0567174	-0.00845709	-0.0321521	-0.0263405	-0.00640169	-0.0223984	0.0211966	0.0605458	0.112776	0.0895116	-0.0161814	0.0152844	-0.00926646	0.0446327	-0.0242672	-0.0672644	-0.0237598	0.00452598	0.0538605	-0.0258434
TCGA-CD-5813-01	0.198639	-0.0291953	0.0315769	0.067402	0.101643	-0.0251138	-0.108152	0.0680236	0.0474977	-0.0279188	-0.0211401	-0.00561178	-0.0855278	-0.0533397	0.00774804	-0.023717	0.014675	0.00840366	0.13063	-0.0400605
TCGA-CD-8524-01	0.0569698	-0.00661499	-0.0128177	-0.0174783	-0.0123913	0.0460223	0.0710573	0.0374249	-0.0104637	0.0275145	-0.0221465	0.00895669	-0.0313393	-0.00625283	-0.00106099	0.0245746	0.0305576	2.51254e-05	0.10248	0.000833123
TCGA-CD-8530-01	0.100988	-0.0454161	-0.0168443	-0.00589137	-0.00957137	-0.032893	0.0205743	0.00277916	0.02503	-0.0108135	-0.0310473	-0.00548562	-0.0500012	-0.0667808	-0.0326149	-0.0284475	-0.00519355	-0.036556	-0.0133713	0.0537068
TCGA-BR-8286-01	-0.0106543	-0.0258315	-0.0146196	-0.0209185	-0.0112002	0.000476145	-0.012397	-0.00423317	0.00664955	0.0183992	-0.00971764	-0.0167835	0.0401831	0.0250882	0.00641304	-0.00937366	-0.0196251	-0.0011767	0.059728	0.0130534
TCGA-HU-A4GT-01	-0.0813436	0.00615841	-0.0350418	-0.0422672	-0.0510954	-0.011452	0.0138974	0.0562328	0.114789	0.12794	-0.00837599	-0.0138316	0.0819557	0.070758	-0.0120168	-0.0499547	-0.0311426	0.0444401	-0.0114595	-0.0345911
TCGA-BR-A4J9-01	0.0286665	-0.0752418	-0.0384444	-0.0173475	-0.0550793	-0.0607468	-0.0288735	-0.0419636	0.00815698	-0.049571	-0.0416177	-0.0600097	-0.108888	-0.230322	-0.0577029	-0.0915539	-0.0760683	-0.116326	-0.0787295	-0.0404682
TCGA-BR-6803-01	0.0746612	-0.0438253	-0.00629196	0.0185292	4.81167e-05	-0.0336812	-0.095757	0.0273247	-0.0101919	-0.0491381	-0.0268361	-0.0258795	-0.0841709	-0.124208	-0.0114599	-0.0515465	-0.0278562	-0.0204409	0.00251355	-0.0129431
TCGA-BR-6457-01	0.160155	-0.0411323	-0.00571547	0.0159147	0.0159075	-0.0329674	-0.115051	0.0502388	-0.0125137	-0.0559443	-0.0261072	-0.0238129	-0.100447	-0.103959	0.0129601	-0.0320376	0.00973872	-0.00298881	0.0102847	-0.0168829
TCGA-CD-A489-01	0.0390668	-0.0269232	-0.0185535	-0.00324884	-0.0228982	-0.00717714	0.0128592	-0.0208243	0.0161161	0.0113043	0.000594892	-0.0384659	-0.0747741	-0.12188	-0.0270339	-0.057158	-0.0341086	-0.0849492	-0.0795809	-0.0306373
TCGA-CD-5803-01	0.128102	0.109542	0.0706223	0.132809	0.0988291	-0.0130183	-0.085148	0.0356173	0.0079274	-0.0425862	-0.021003	-0.0311992	-0.0451696	-0.0617234	0.0186945	-0.0219189	-0.00131896	0.00942588	0.024193	-0.0254699
TCGA-BR-8366-01	0.041153	0.0940584	0.0547883	0.0940384	0.136616	0.0717213	-0.0405587	0.00767574	0.0280618	0.00997352	-0.0179774	-0.00777282	-0.0246546	-0.0180835	-0.023199	-0.0469624	-0.0429884	-0.0250899	-0.0195161	-0.0266718
TCGA-CD-8533-01	-0.0097064	-0.0559839	-0.0088539	-0.0471446	-0.0576037	-0.0245442	0.0219005	-0.0326553	-0.0369338	-0.0431704	-0.0163034	0.0338948	0.0861205	-0.00395262	0.0262508	0.19502	0.14888	0.0621386	0.013626	-0.0305424
TCGA-IN-AB1X-01	-0.0315452	0.168174	0.0267964	0.0376788	-0.00587083	0.0947364	0.0194165	-0.0690332	-0.0522564	-0.0581294	-0.0199482	-0.0184692	0.00577621	0.0240518	-0.0140237	0.0127042	-0.00866658	-0.0259414	-0.0047858	0.0680117
TCGA-CD-A4MG-01	-0.0145162	-0.0588367	-0.0294782	-0.0324044	-0.0174697	-0.0398218	0.0585579	0.0583954	0.0927272	0.103061	-0.0298292	0.0117828	-0.0213074	0.0041918	-0.0314983	-0.0612774	-0.000566162	-0.0158809	-0.0264832	-0.0353022
TCGA-BR-6566-01	0.0193275	0.0277641	-0.0139824	-0.0189935	0.0331693	-0.00550653	-0.0699801	0.144245	0.105511	0.0733928	-0.0138625	0.0166177	-0.0353448	0.0270465	-0.00821218	-0.0750878	-0.0168347	0.071392	0.0511285	-0.0383301
TCGA-CG-4477-01	-0.0212427	0.0643511	0.0249115	0.0577744	0.0790377	0.0374973	0.0348494	-0.0669484	-0.0203312	0.0348594	-0.0218919	-0.0392285	0.0521659	0.000465585	-0.00963579	-0.0235771	-0.0323292	-0.0549969	-0.0757699	0.00582799
TCGA-FP-8209-01	0.0980215	-0.0468929	0.0495669	0.0956008	0.0077756	-0.0501016	-0.056934	-0.0816318	-0.0523824	-0.116245	-0.0313353	-0.0564158	-0.0894751	-0.205883	-0.0465507	-0.0555757	-0.0693673	-0.0982865	-0.0692126	-0.0420613
TCGA-B7-5818-01	-0.0205381	0.0185662	0.000794619	-0.00118476	0.0783538	-0.0168481	-0.0665441	0.117566	0.0520038	0.0527749	0.0102963	0.066472	-0.0228277	0.0386213	0.0360182	-0.00929396	0.0133927	0.116629	0.0712553	-0.048335
TCGA-D7-6522-01	0.176412	0.00925742	0.120181	0.180986	0.20818	-0.0246965	-0.111311	0.107415	0.0425989	-0.0182397	-0.0192888	-0.0176246	-0.0813069	-0.0460868	0.00326803	-0.058007	-0.00661546	0.0336421	0.0355757	-0.0290343
TCGA-CG-5725-01	-0.0101289	-0.0736925	-0.0383642	-0.054935	-0.0461707	-0.0151351	-0.0584963	0.087284	-0.0188204	0.0183229	-0.00348113	0.0832507	0.038698	-0.0116986	0.0847253	0.0913341	0.0837444	0.14068	0.0583747	-0.0497533
TCGA-RD-A7C1-01	-0.0399015	0.00133128	-0.0108502	-0.00134674	0.0374724	-0.033617	-0.0149095	0.060471	0.0731927	0.128939	-0.031141	-0.0372684	0.0094887	0.0303076	-0.0362178	-0.00654761	0.0366574	0.00944388	0.00116936	-0.0449043
TCGA-D7-A6F2-01	-0.0277657	-0.0245317	-0.0114135	-0.0178075	-0.00930331	-0.0298362	0.00593725	-0.0185865	-0.0431537	-0.0459735	0.137688	-0.00662493	-0.0311074	0.0254288	-0.0313276	0.0161201	0.00759354	-0.00614749	-0.0482872	0.00441592
TCGA-BR-8368-01	-0.0656515	0.000627062	-0.0111668	-0.0212957	-0.034104	-0.0141768	-0.0153207	0.0199834	0.00332314	0.0246428	-0.0146437	-0.00775019	0.0871506	0.066993	0.00134361	-0.0107785	-0.0147814	0.0717476	0.0417219	-0.0213643
TCGA-CG-5720-01	0.00256982	-0.00208607	0.00550782	0.004518	0.0182124	-0.00381249	-0.0853323	0.0751486	0.0161197	0.00751941	-0.000404464	-0.0106685	-0.0106726	0.0471905	0.00619259	-0.0281548	-0.00261927	0.0762956	0.0241674	0.0410814
TCGA-BR-7707-01	-0.0209253	0.0696335	-0.0153859	-0.0335724	-0.023866	0.0544407	-0.0406809	0.105444	0.0620611	0.0645694	-0.00655873	-0.0019434	0.0613481	0.041845	0.0227738	-0.0389538	-0.00732398	0.159297	0.0698438	-0.0495112
TCGA-CG-4442-01	-0.0635263	-0.0595271	-0.0437685	-0.0461564	-0.0452946	0.00911197	0.0256809	-0.0817508	0.0512713	0.0098342	-0.0260215	-0.0468672	0.0717076	0.0185745	-0.0227499	-0.0519943	-0.0756161	-0.057654	-0.0799283	0.000498043
TCGA-F1-6874-01	0.0207002	0.00982297	0.0239458	-0.00089051	0.00509301	-0.0074021	-0.0634247	-0.055946	-0.0757543	-0.0817455	-0.00596595	0.0130375	0.00517379	0.0489453	-0.0345585	0.019859	-0.00148327	0.00479096	-0.0184208	0.0137982
TCGA-RD-A8N2-01	0.0214517	-0.0857852	-0.046816	-0.0360037	-0.0515932	-0.069328	-0.0353643	-0.0779689	-0.040991	-0.0735482	-0.0434768	-0.0708264	-0.115759	-0.258666	-0.0723052	-0.102127	-0.0962287	-0.142938	-0.111467	-0.0491122
TCGA-RD-A7BW-01	0.0846913	-0.00923982	0.00360873	0.050346	0.0591865	-0.0305157	-0.0420028	-0.000898007	0.0329135	0.000158698	-0.0325922	-0.0433713	-0.0924473	-0.147992	-0.0406178	-0.0739859	-0.0441963	-0.0884196	-0.0354696	-0.0487492
TCGA-D7-A6F0-01	-0.000191973	-0.0206893	-0.0183976	-0.019177	0.024013	-0.019143	0.025181	0.0204665	-0.0329713	0.027076	0.0223757	0.0104802	0.0801917	0.0180242	0.100081	0.192119	0.0810312	0.107121	0.0390432	-0.0163961
TCGA-BR-8680-01	-0.0633704	-0.0585743	-0.0229847	-0.0624114	-0.0680772	0.0095196	0.144038	0.00155094	0.0524841	0.0190042	0.00516213	-0.00607024	0.1128	0.028306	0.00421933	0.0109747	0.00453469	0.0586874	0.0142676	-0.0106534
TCGA-CG-5716-01	-0.0385874	-0.0434942	0.0174344	0.0399999	-0.0344824	0.00701677	-0.0778848	0.0408063	-0.025812	-0.0109898	-0.0148118	-0.0158612	-0.0286121	0.0593328	-0.0110271	-0.0322797	-0.0263652	0.0362062	0.0113781	0.237603
TCGA-R5-A7ZF-01	-0.0550105	-0.00213204	-0.046224	-0.0602132	-0.0623062	0.0295001	-0.0246687	0.0671779	0.0844316	0.127596	-0.0176777	0.0378967	0.0800336	0.0165505	0.00539359	0.00473808	0.0259654	0.0675014	0.020385	-0.0388964
TCGA-CG-4460-01	-0.0419661	-0.0555768	-0.0256186	-0.0249616	-0.0232413	-0.0304167	0.020248	-0.0652185	-0.0264301	0.0215895	-0.00843422	-0.0392471	0.0594816	0.00665152	0.00961997	0.00744567	-0.0430562	-0.046376	-0.0346128	0.0435304
TCGA-VQ-A8PQ-01	0.0567347	0.0236692	0.164296	0.268024	0.039827	-0.0264503	0.029468	-0.079339	-0.0289294	-0.0940425	-0.0135073	-0.0251477	-0.034874	-0.0358539	-0.0467282	-0.0135989	-0.0430981	-0.06178	-0.0315788	-0.0172673
TCGA-R5-A7O7-01	-0.0196103	-0.06187	-0.0384271	-0.0369471	-0.047769	-0.0282576	-0.00811622	0.0654518	0.0309867	0.0849945	-0.0310828	0.0331939	-0.0285442	0.0122511	0.0302578	-0.0447118	-0.0345899	-0.00363148	-0.0700565	-0.0394173
TCGA-VQ-A8E7-01	-0.0255078	-0.0400335	-0.0366902	-0.0586817	-0.06778	0.0331689	-0.0108461	-0.0466869	-0.0483741	-0.066774	0.116497	0.000282636	0.0027407	0.0164553	-0.0265919	-0.00909277	-0.0296285	-0.00205101	-0.0214553	-0.00888071
TCGA-HU-A4GQ-01	-0.0376358	0.0460566	-0.0418705	-0.0360607	-0.0164711	-0.0206588	0.0256921	-0.00534951	0.092907	0.0455983	-0.0241385	-0.00808582	0.0136787	-0.0107966	-0.0307668	-0.0460237	-0.0261299	-0.0383895	-0.0541388	-0.0431563
TCGA-VQ-A91D-01	-0.0245904	0.0647678	-0.0211255	-0.0388316	-0.017007	0.0387209	-0.00875127	-0.00776619	0.065085	-0.0328403	-0.0122165	-0.013694	0.00917135	0.0181736	-0.020414	-0.0362405	-0.0393524	0.00934952	-0.00937425	-0.0255644
TCGA-BR-8077-01	-0.0191162	-0.00314852	-0.0270738	-0.00660996	0.0016284	-0.0445208	0.0906215	0.037934	0.116619	0.0814308	0.0357982	-0.0281884	-0.0211141	0.00758434	0.00234535	0.00205835	0.155015	-0.0208643	-0.0562579	-0.0291554
TCGA-VQ-AA68-01	-0.0526241	0.0133604	-0.00570884	-0.0391078	-0.0408189	0.0739013	-0.0278726	-0.055624	-0.0827824	-0.0521685	0.0164338	-0.0424292	0.0111895	0.0572856	0.0771848	0.030968	-0.0428449	-0.0026286	-0.0144962	0.00776148
TCGA-VQ-A8PD-01	0.0195727	0.00469687	0.0541291	0.0779439	-0.00220986	-0.00336648	0.0176497	-0.0813344	-0.0659656	-0.0754141	-0.017953	-0.031995	-0.022992	-0.00657676	-0.0418192	-0.022091	-0.0464574	-0.0583735	-0.051811	0.0491764
TCGA-VQ-A94O-01	-0.0122794	-0.043108	-0.01427	-0.0337663	-0.0423817	-0.017835	0.0956694	-0.032449	-0.0358687	-0.00873953	0.00651529	0.00680026	0.0623819	0.019492	0.0506002	0.208414	0.230634	0.0305465	0.0558406	-0.0376556
TCGA-VQ-A94R-01	0.0145451	-0.0240995	-0.00959743	-0.0165005	-0.0294338	-0.0356833	0.05516	-0.0606711	-0.0247668	-0.0716079	-0.00229694	0.019288	0.0163668	-0.00493616	0.0642567	0.0578956	0.038943	-0.0183765	-0.00108926	-0.00746625
TCGA-VQ-AA6D-01	-0.0571092	0.0211729	-0.0245666	-0.0415397	-0.0434961	-0.000181558	0.0823614	-0.0281982	-0.046362	0.0409139	0.00994938	0.00720697	0.0744845	0.0457543	0.0548701	0.0834457	0.0373913	0.0449279	-0.0468124	-0.0378779
TCGA-BR-8484-01	-0.00267397	0.0125552	0.0300535	0.0476739	0.0592049	-0.0272357	0.0337163	-0.0520642	-0.0519966	-0.0255041	-0.0253957	0.133741	0.0155703	0.0224011	0.00436375	0.0462167	0.0174383	-0.0126844	-0.0130264	0.0149723
TCGA-BR-8373-01	0.0410958	-0.0101467	0.00412796	-0.0263468	-0.0285804	0.015644	-0.0318114	-0.131047	-0.107696	-0.11153	0.0086069	-0.0240212	-0.0160122	-0.0156847	0.00669052	0.128086	0.0118084	-0.0552184	-0.0727858	-0.0302255
TCGA-VQ-A8P2-01	-0.0753681	-0.0498736	-0.0366326	-0.0592425	-0.0618341	0.00557139	0.0314965	0.0274216	0.0523107	0.0708237	-0.00562034	-0.00755041	0.118892	0.0526804	-0.00395455	-0.0290516	-0.0148736	0.0815614	0.0201148	-0.0147155
TCGA-VQ-AA6A-01	-0.0419164	-0.0382109	-0.0166639	-0.0429881	-0.047919	0.0277926	-0.03324	-0.0573081	-0.124521	-0.0577526	-0.0208491	0.162521	0.00364596	0.0701584	0.00143772	0.093592	0.000317378	-0.0182031	0.0283511	0.0633909
TCGA-VQ-A91N-01	-0.0691542	-0.0351943	-0.0108482	-0.0453333	-0.0594337	0.012337	0.00182431	-0.0504454	-0.0481055	-0.0166321	-0.0199174	-0.0152734	0.0563535	0.05929	-0.0326696	0.0454653	0.022874	0.00347432	-0.0461467	0.00728981
TCGA-VQ-A922-01	0.0668519	-0.0433755	-0.00724822	-0.0315202	-0.0472918	-0.00842739	0.0140596	-0.0700379	-0.093831	-0.0863591	0.0431756	-0.0343122	0.0328185	-0.0275786	0.165618	0.0859123	-0.00841491	0.017396	-0.0137348	-0.0373761
TCGA-VQ-A8PP-01	-0.00633362	-0.00983073	0.00109449	-0.0185362	-0.0282429	0.0858332	0.00196369	-0.0842637	-0.0630638	-0.0813501	-0.0128433	-0.0316937	0.0224204	0.00506587	-0.0258674	-0.0153922	-0.0684561	-0.0245711	-0.0250536	-0.039921
TCGA-BR-7717-01	0.00134928	-0.0384607	-0.0466435	-0.0437512	-0.0437826	-0.0119377	-0.0445836	0.118946	0.16351	0.0894757	-0.0105251	-0.0202988	-0.0428252	0.00186141	0.019663	-0.0306624	0.0617677	0.0386817	0.00353081	0.00884002
TCGA-VQ-A8P3-01	-0.0167486	-0.0381123	-0.0429284	-0.0410238	-0.0444646	0.00321271	0.0166869	0.023237	0.0236635	0.0412647	-0.0175007	-0.0133221	-0.0259801	0.0137266	-0.0360612	-0.0715553	-0.052816	-0.0349341	-0.0342393	-0.0110411
TCGA-HU-A4H2-01	-0.0494046	-0.0360262	-0.0161655	-0.0305247	-0.0363896	-0.0134335	0.0425148	0.0234992	-0.0106983	0.0257152	-0.0128472	0.0916788	0.00247011	0.0372749	-0.045051	-0.00820142	0.0039004	0.00607238	0.0923634	-0.00619426
TCGA-BR-8690-01	-0.0163697	0.0468545	-0.0226041	0.00587009	0.0235637	-0.021089	0.205565	0.0491466	0.0874797	0.0766813	-0.00748928	-0.018781	-0.0435197	-0.0151904	-0.0249695	-0.0293949	0.00472666	-0.0397218	0.0253472	-0.0507655
TCGA-BR-A4QL-01	-0.0758757	-0.0264074	-0.0527363	-0.0548941	-0.0659903	-0.0401325	0.07805	0.0763621	0.177381	0.135499	-0.0180446	-0.0204742	0.00478154	0.0305158	-0.0263941	-0.0898525	-0.0393127	0.00484951	-0.0122447	-0.0370029
TCGA-VQ-A8PK-01	-0.0130776	0.0325428	-0.012525	-0.0284196	-0.0346382	0.0382248	0.00213159	-0.0322275	-0.11545	-0.0175606	0.00334706	0.0281003	0.0102643	0.0404365	0.0397647	0.023792	0.00251985	0.00522919	-0.0214111	-0.0127428
TCGA-VQ-A928-01	0.0219048	-0.050992	-0.026977	-0.0468369	-0.0465855	-0.0160757	0.0278024	-0.0516264	-0.0387612	-0.0694151	-0.0111573	-0.0264906	-0.0104151	-0.00780014	-0.028861	0.0234716	-0.010884	-0.0166467	-0.00164608	-0.0428126
TCGA-VQ-A8PH-01	-0.0472115	-0.0442204	-0.0331596	-0.0355638	-0.0607831	-0.0388859	0.135225	0.0106503	0.0778142	0.0608464	0.0425014	-0.0104852	0.0381144	0.0101826	-0.00660386	0.0817354	0.0883543	0.0183338	0.0653641	-0.0310888
TCGA-VQ-A925-01	-0.0443446	-0.0453162	-0.0195347	-0.0388789	-0.058287	0.0148283	-0.0020995	-0.0383339	-0.0212338	-0.0417053	0.0188111	-0.0118544	-0.00203361	0.0496245	0.00102642	-0.0169458	-0.0589796	-0.0396952	-0.0664337	0.201793
TCGA-HU-8249-01	-0.0374058	-0.0161718	-0.0154966	-0.0260127	-0.0497446	-0.0170373	0.0424165	0.0473885	0.0872644	0.039878	-0.00667148	-0.000482195	0.0570934	0.014501	0.0826846	0.0477149	-0.00289779	0.0541628	0.0416485	-0.0255642
TCGA-D7-6526-01	-0.036498	-0.0405449	-0.0178201	-0.0586821	-0.0484226	0.0100724	-0.0511023	0.0170415	-0.0426427	-0.0326327	0.0806652	0.0307112	0.0304146	0.0419625	0.0148831	0.0367744	0.010673	0.0815122	0.186294	-0.0130357
TCGA-SW-A7EB-01	-0.0116078	-0.0412812	-0.0237875	-0.00681075	-0.0315033	-0.0247297	-0.00956046	0.0336941	0.067462	0.0393378	-0.0226158	-0.0284065	-0.0344761	0.00629865	-0.0117781	0.0250967	0.0151685	-0.0246753	0.0352184	0.112683
TCGA-HU-A4H6-01	-0.0284652	-0.0202445	-0.0155311	-0.00730929	-0.0391251	-0.0195295	0.138809	0.0336176	0.0351321	0.0533859	-0.0223222	-0.0313941	-0.0283092	0.0180665	0.00909487	-0.0252974	0.00448017	-0.0428431	0.0430053	0.049308
TCGA-BR-8483-01	-0.0346124	-0.0288279	-0.0385956	-0.0582058	-0.0598426	-0.0091133	0.11607	0.0278282	0.00478645	0.012669	0.232007	0.067006	-0.0243484	0.00530237	-0.0162199	0.0516872	0.115392	0.000623404	0.00476599	-0.0379365
TCGA-VQ-AA69-01	-0.053278	-0.0227448	0.0125946	-0.028189	-0.0199979	0.0306667	0.0617769	-0.109752	-0.0729634	-0.0688367	0.0284724	-0.0228072	0.162757	-0.0163067	-0.00591775	0.0830184	-0.0200127	0.0140105	0.00448986	-0.0341842
TCGA-R5-A7ZE-01	-0.0447869	-0.0691753	-0.0419852	-0.0691925	-0.067549	0.253544	-0.0618923	0.0417272	-0.00212531	0.0376824	0.258676	-0.0291403	-0.0118102	0.0158039	0.00928311	-0.0225249	-0.00231117	0.0102123	-0.0389534	-0.0423702
TCGA-VQ-A8DU-01	-0.0126204	-0.0306182	-0.034219	-0.0408805	-0.0556516	-0.0349786	0.116272	0.00804777	0.0786807	0.0444799	0.00132593	-0.0453622	-0.00808139	-0.00729082	0.00377252	0.0222824	-0.00508061	-0.0482316	-0.0503285	0.00240185
TCGA-HU-A4HD-01	-0.027193	-0.0502684	-0.0300896	-0.0541539	-0.0457674	0.00262641	0.0330418	-0.0105383	0.00621829	-0.00287776	0.093006	-0.0304794	0.0139411	0.0208763	-0.0313575	0.0531609	0.0712036	0.0274952	0.00434006	-0.0365084
TCGA-VQ-A8E2-01	0.052982	-0.0233194	-0.0180275	-0.0341532	-0.0307698	-0.0153909	0.0502873	-0.0204943	-0.0108898	-0.0207314	0.00656086	-0.0117861	0.0390443	-0.0329327	0.0480714	0.196404	0.187954	0.0243306	-0.0099779	-0.0425847
TCGA-VQ-AA64-01	0.0653387	-0.0324726	-0.0117784	-0.0370806	-0.0463751	-0.00404672	0.0255087	-0.0278201	-0.0796474	-0.0126435	-0.00441578	0.00962265	0.0147831	0.000615327	0.0287187	0.0559225	-0.00428597	-0.0030248	0.022864	0.0184339
TCGA-VQ-A91V-01	-0.0697522	-0.011113	-0.0266627	-0.0458715	-0.0586729	0.0292532	0.0047405	-0.041915	-0.0836001	-0.0174794	-0.00913322	0.0335312	-0.0161029	0.0862675	-0.0131443	-0.0121499	-0.0455052	-0.0107796	0.018887	0.141141
TCGA-D7-A74A-01	-0.0766191	-0.0314122	-0.0404273	-0.0482773	-0.0474631	0.000584056	-0.0393137	0.0709487	0.195448	0.0934193	-0.0133446	0.00822609	-0.0160555	0.0468296	0.00598079	-0.0268187	0.0160764	-0.0120552	0.0199783	0.0200689
TCGA-VQ-A91Z-01	-0.0474352	-0.0490835	-0.0140312	-0.0571602	-0.0699331	0.0288138	0.0522738	-0.0771564	-0.0192495	-0.0651326	0.00413834	-0.00259436	0.0523442	0.0146605	0.0241004	0.189084	0.126531	0.0240103	-0.0291727	-0.054905
TCGA-FP-7829-01	-0.00481063	-0.0501482	0.00019977	-0.0455046	-0.0281292	0.0206788	-0.0227451	0.0111529	-0.0617867	0.000814685	-0.00617509	-0.042127	0.0677035	0.0586737	0.143393	0.0325121	0.0314465	0.0598255	0.0113163	-0.0283646
TCGA-CD-5804-01	0.0290077	-0.0020852	-0.0147395	-0.0234005	0.0177674	-0.0222836	-0.0633126	0.102946	-0.0174113	0.0245504	0.0277954	0.0428008	-0.086485	0.0102991	-0.0096563	-0.00113074	0.0497324	0.0577366	0.0351979	0.00687846
TCGA-BR-7716-01	0.0269947	0.0295477	0.0359309	0.0387353	0.074602	0.00228387	-0.0682482	0.0395833	-0.0473543	-0.0245729	-0.00625344	0.0110022	0.00819307	0.0215171	-0.00803759	0.100088	0.0487151	0.0640483	0.270574	-0.0215988
TCGA-VQ-A91K-01	-0.0313135	0.0459903	0.013452	-0.0135468	0.000821097	0.031405	-0.040973	-0.0142705	-0.0842977	-0.051994	-0.00299115	-0.0198632	-0.0183305	0.0502471	-0.0126251	-0.0187849	-0.0366341	-0.000594251	-0.012563	0.0142772
TCGA-RD-A8N5-01	0.0908045	-0.0539361	-0.00783288	-0.0156105	0.0145678	-0.0165852	-0.0219285	-0.00851593	-0.0211547	-0.0343911	-0.0276078	-0.0242806	-0.0899751	-0.0254593	-0.0690844	-0.0556373	-0.0520618	-0.0874729	-0.0697883	-0.0208003
TCGA-VQ-A91U-01	-0.0470845	0.0391765	-0.00548316	-0.0036652	-0.0282698	-0.0159863	0.0764802	-0.0511621	0.0203155	0.00332823	-0.00582059	-0.00883343	0.056989	0.0323589	0.115193	0.0230504	0.00547171	-0.00731708	0.0106951	-0.0236963
TCGA-VQ-AA6F-01	-0.0361716	0.0171283	-0.00145234	0.00259942	-0.0267664	-0.0138615	-0.0205741	-0.0386461	-0.0283857	-0.0530831	-0.00928885	0.0494637	-0.0190173	0.0518917	-0.0340962	-0.0149437	-0.0419227	-0.0277964	-0.00147286	0.0256673
TCGA-BR-6456-01	0.108933	0.011985	0.0188913	-0.00230859	0.0181959	0.015549	-0.0808421	0.00453839	-0.0541284	-0.0529872	-0.017988	0.0403728	-0.0180655	-0.0275365	0.0247274	0.022315	0.00715747	0.0415216	0.0500195	-0.0390833
TCGA-BR-7901-01	0.0630077	-0.000601663	0.000855951	-0.00412505	0.0288945	0.0104285	-0.044747	0.00922964	-0.051339	-0.0164806	-0.0210555	-0.0172863	-0.0533495	-0.0126395	0.0750563	0.0520791	0.0474756	-0.0157678	0.0187424	0.0408924
TCGA-HF-7133-01	0.00500246	0.000296096	0.0227059	0.0204915	0.04735	-0.00812225	-0.0685535	-0.0172441	-0.0261249	-0.046555	-0.0215575	-0.0168223	0.0433976	0.0177464	0.000214491	0.0260871	-0.0515389	0.0324475	0.072947	0.0480225
TCGA-BR-4280-01	-0.0693333	0.0194563	-0.0180378	-0.0190424	-0.010398	-0.0260871	0.020286	-0.00803261	0.0597533	0.0355246	-0.00352088	-0.0277578	0.0704112	0.0508075	-0.00144451	0.00539959	0.0300417	0.0111331	-0.0324895	-0.0385107
TCGA-HF-7132-01	-0.00952403	0.0160257	0.0352862	0.0523945	0.0195353	-0.00605657	-0.0440235	-0.0339862	-0.0443405	-0.0479065	-0.011742	-0.0239321	0.0165073	0.0255906	-0.0381238	-0.0219508	-0.0269831	0.00578904	-0.0105328	0.0688451
TCGA-CG-5718-01	0.0100211	-0.0128004	0.00411277	0.00905354	0.0301429	0.00430412	-0.0683152	0.109375	-0.0396453	-0.0116976	-0.0138949	0.0345402	-0.0404707	0.019647	0.177145	0.0257638	0.145118	0.136109	0.0733931	0.00975527
TCGA-CG-5732-01	-0.0328651	-0.000553232	0.0145234	0.0311733	0.00656068	-0.00208094	-0.0942286	0.0721829	0.00773369	0.0207523	0.00196128	0.00256872	-0.0417181	0.0572735	0.0587366	0.0457136	0.0224354	0.0591828	-0.0320455	0.0761916
TCGA-D7-5577-01	-0.0242117	0.119083	0.0113968	0.0220113	0.130775	0.0274966	-0.0593311	0.0943326	0.0629773	0.0647436	-0.0121789	-0.0010679	-0.00394236	0.0341616	0.00626666	-0.0156086	0.0291274	0.0594573	0.217281	0.00816925
TCGA-D7-8572-01	0.0671057	-0.003426	0.0160327	0.00490769	0.0109827	-0.0157699	-0.0152205	-0.0372236	-0.0319038	-0.0574724	-0.0197116	-0.0220044	0.0425165	-0.0250671	0.00636835	0.0378587	-0.0227444	0.012944	0.000724803	-0.0446924
TCGA-CG-4441-01	0.0209284	-0.0212998	-0.00760879	-0.0186525	-0.00134419	-0.000684487	-0.0691806	0.0241717	-0.0353971	-0.0308302	-0.01616	-0.00157469	0.00162833	0.0436987	0.00574693	0.0222643	0.0301535	0.0617643	0.00526185	0.0114792
TCGA-HU-A4G3-01	-0.0429699	-0.0595836	-0.0422001	-0.0469371	-0.0585325	-0.0187067	-0.0327574	-0.00787453	0.00779582	-0.0137584	-0.0183977	-0.0264644	-0.0581598	0.0465363	-0.0369483	-0.0638349	-0.0653237	-0.0464649	-0.0407231	0.164721
TCGA-D7-6815-01	-0.0155835	-0.0160161	-0.0158326	-0.0334736	-0.0350444	-0.00987637	-0.0682746	-0.0307514	-0.0645856	-0.0397915	0.296826	0.0230556	0.0173221	0.0389719	0.0497519	0.0394795	0.000602818	0.0260215	0.000320593	-0.00744099
TCGA-D7-8579-01	0.0377584	-0.0321293	-0.00893226	-0.00712363	-0.0140705	-0.0231753	-0.0283722	-0.0465447	-0.0635175	-0.0822147	0.0186639	-0.0222881	-0.0649174	-0.0771074	-0.0392287	-0.0358839	-0.0384437	-0.0576882	-0.0584883	-0.0106844
TCGA-CD-8527-01	-0.0302032	0.0370878	-0.0203892	-0.0381824	-0.0192576	0.00601756	0.0498885	0.11587	0.0776808	0.156115	-0.0117021	0.51652	-0.0163932	0.0161656	0.0350923	-0.00406323	0.0599361	0.0451855	0.0388144	-0.0308849
TCGA-IN-A6RL-01	-0.0375632	-0.0150061	-0.0273353	-0.0304915	-0.0315258	0.0205237	-0.016307	0.0405041	0.0165898	0.0557107	-0.00363548	0.0112893	-0.0263021	0.0458769	0.0338747	-0.00958769	-0.000267251	-0.00543346	0.0481166	0.178035
TCGA-HU-A4GP-01	-0.0495714	-0.042172	-0.0251518	-0.0484841	-0.0615647	0.025876	-0.0157162	-0.0210547	-0.0289139	0.00371415	-0.0227681	-0.00822581	0.00551825	0.0658697	-0.0368347	-0.0292242	-0.0280177	0.000497128	-0.0143653	0.0924072
TCGA-IN-8462-01	-0.00623987	-0.0294156	-0.0394858	-0.0399894	-0.0509741	0.172675	-0.020305	0.0239102	0.00512735	0.000391101	-0.0131292	-0.0447374	-0.0972697	-0.020162	-0.0407759	-0.0780363	-0.0560813	-0.0575102	-0.0268138	-0.00528103
TCGA-CG-4437-01	0.00426286	0.0712685	0.00683825	0.0033355	0.0686168	0.0144616	-0.0848151	0.151944	0.0699959	0.0467564	-0.00784923	0.0135378	-0.0254751	0.0352037	0.0495961	-0.0375732	0.0162276	0.13209	0.0947957	-0.00272984
TCGA-CD-8529-01	0.0617968	0.017711	0.0589325	0.0780266	0.0962854	-0.000987712	-0.0434846	-0.00123975	-0.05869	-0.0438239	-0.00683461	0.00512162	-0.0274217	-0.00555164	-0.00487484	0.0161299	-0.0122752	0.00351406	-0.0182665	0.0741732
TCGA-BR-6565-01	0.0117313	0.0558188	0.0153808	0.00459627	0.0377081	-0.0079672	-0.0380072	0.0248709	-0.0234071	-0.0198079	0.13277	0.025168	0.0422094	0.000163005	0.0677234	0.0433713	0.0790608	0.121808	0.0844639	-0.041135
TCGA-BR-8081-01	0.0227056	0.071609	0.0325986	0.0555136	0.0963392	-0.00971691	-0.0296845	0.0281401	0.0451125	0.0227107	-0.0147633	-0.023335	0.0237634	0.00494	-0.0184881	-0.0422691	-0.0347259	0.0223756	-0.0100828	-0.0439451
TCGA-VQ-A8P8-01	-0.014141	-0.0066346	0.00315407	0.0205882	-0.0386536	-0.00638639	0.0182773	-0.0460544	-0.0332159	-0.0160318	-0.02136	-0.0272267	-0.0181119	0.0125542	-0.0408135	-0.0513049	-0.063223	-0.056946	-0.0506693	0.0691985
TCGA-BR-A4J6-01	-0.0103217	-0.0336107	-0.0323545	-0.0250597	-0.0323111	0.00753672	0.0189735	0.0409159	0.0632435	0.0474639	-0.0244281	0.000527717	-0.0755925	0.00995437	-0.0220888	-0.0666001	-0.0358493	-0.0427151	-0.0137977	0.131732
TCGA-HU-A4GF-01	-0.0373904	0.00178788	-0.0139286	-0.0316378	-0.0350222	-0.00645458	0.0480675	-0.0252489	-0.0131173	-0.00767828	0.18344	-0.00187954	0.048669	0.0269551	0.0585044	0.0680581	0.0374942	0.0131312	-0.0271701	-0.0289746
TCGA-CD-A48A-01	-0.044738	-0.0221856	-0.0320063	-0.037907	-0.0277167	-0.0368378	0.0922739	0.0344447	0.0361192	0.0383598	-0.013928	0.0140123	-0.0473183	-0.00853194	-0.0360109	0.0141435	0.00606182	-0.0197495	-0.00392536	-0.0408915
TCGA-F1-A72C-01	0.00528851	0.0566135	-0.0195202	-0.0124424	0.0132328	-0.00756836	-0.0255953	0.0710259	0.0253819	0.0844979	-0.0153508	-0.000471385	-0.0171871	0.0162452	-0.0109245	-0.0137873	0.0229798	-0.00395251	0.00983546	-0.024967
TCGA-BR-7715-01	0.0288439	-0.0447216	-0.0315834	-0.0427517	-0.0365518	-0.0229338	-0.0274993	0.0281911	0.0382815	0.0039317	0.0756592	0.0228379	0.0229686	-0.0261443	0.0361953	0.0940844	0.185489	0.0767112	-0.0350641	-0.0478899
TCGA-VQ-AA6G-01	-0.0546342	0.0242233	-0.0158418	-0.0472928	-0.0582115	0.0565853	-0.050296	-0.0747693	-0.111152	-0.0682656	0.146261	-0.0278853	-0.0324383	0.0809107	0.0433916	-0.0132023	-0.0568717	-0.0573072	-0.0692203	0.0200292
TCGA-HU-8604-01	0.0125585	0.020233	0.0265372	0.0466354	0.052523	-0.0319478	0.0233867	0.0363198	0.102641	0.0162397	-0.0141435	-0.0204096	0.0478941	-0.00182817	-0.0142423	0.00572342	-0.0121893	0.029972	0.0336749	-0.0639896
TCGA-BR-6801-01	0.00308723	-0.0371587	-0.0215132	-0.0513264	-0.0450531	0.0255695	-0.0714823	0.0633502	0.00435663	-0.0201707	-0.0148006	0.0509664	-0.0651328	-0.00158495	-0.0109463	0.0137878	0.106218	0.0232725	-0.00986759	-0.0393813
TCGA-CD-A486-01	0.00519919	-0.0102625	-0.0194433	-0.0270713	0.0139153	-0.0121317	0.0458352	0.0331245	-0.01021	0.0504236	-0.000353822	0.0659113	-0.0278919	0.00698193	0.0835279	0.0290651	0.0563917	0.010683	-0.0284057	-0.032243
TCGA-VQ-A924-01	-0.0441658	0.119283	-0.0092235	-0.0187482	-0.0101019	0.0190371	0.0127589	-0.00721347	-0.0223967	-0.000854263	-0.00487326	-0.0256906	0.0766864	0.0325068	-0.0148896	-0.0280189	-0.02524	0.0259726	0.000681998	-0.0334189
TCGA-CD-5798-01	0.0848266	-0.0322069	-0.01687	-0.0265258	0.019248	0.0242851	-0.0995617	0.0939296	0.0354367	0.0215345	-0.0272588	-0.01317	-0.100356	-0.101267	-0.0234353	-0.0819871	-0.0357726	-0.0132635	-0.00528623	-0.00756897
TCGA-VQ-A8PB-01	-0.0580171	-0.0645623	-0.0313317	-0.0448209	-0.0531723	0.00441023	0.0348475	-0.0682157	0.0319212	0.0196195	-0.0218594	0.000663653	0.113353	0.0374904	-0.0330368	-0.044007	-0.0628799	-0.0264314	-0.0499691	-0.0338906
TCGA-CD-8532-01	-0.000843574	0.0419667	0.0489534	0.0904198	0.0596157	-0.00761532	-0.0329371	0.0169941	-0.0293434	-0.0173726	-0.0163146	-7.41531e-05	-0.0189713	0.0304105	-0.0471671	0.0151883	0.0297927	0.00547473	0.0324835	0.0889132
TCGA-CD-A4MH-01	-0.0342803	-0.0311002	-0.0385855	-0.0417702	-0.0567654	-0.0393458	0.136581	0.00751307	0.0215525	0.0502701	-0.000367481	0.00820598	-0.0281242	0.0152831	-0.012032	0.0502186	0.135667	-0.05542	-0.00556112	-0.0281901
TCGA-VQ-A92D-01	-0.0217054	0.00753775	-0.0340681	-0.0552597	-0.0630302	0.0496419	-0.00916467	-0.0314998	-0.0663105	-0.0561507	0.101153	0.0655562	-0.010244	0.0468868	0.129227	0.011465	-0.00831431	-0.00958208	-0.00439577	-0.0356739
TCGA-CG-4304-01	-0.0034975	-0.0494167	-0.00681448	0.0180454	0.00212195	-0.029849	0.0175132	-0.0677399	-0.0730329	-0.0344078	-0.00895612	-0.0119595	-0.0262901	0.0126304	-0.0310423	0.02094	-0.0326316	-0.0706357	-0.0686206	0.0109983
TCGA-BR-4267-01	-0.0434797	-0.0370259	-0.0176476	-0.0223249	-0.00590593	0.00992463	-0.0693286	-0.0379021	-0.0206535	-0.0125685	-0.0238242	-0.0310225	-0.00875505	0.0479419	0.0397854	-0.0294039	-0.0763516	-0.0237177	-0.041035	0.26349
TCGA-CG-4466-01	-0.0676388	-0.0627408	-0.0486846	-0.0532938	-0.068707	-0.0236656	0.047049	-0.0633195	-0.00395808	0.0283991	0.116083	-0.0255144	0.0676844	0.0263332	-0.0187665	0.0365595	0.0388256	-0.040035	-0.0919371	-0.0247811
TCGA-D7-6822-01	-0.0188297	-0.00505308	-0.0102861	-0.0493221	-0.0304232	0.0121635	-0.0314405	-0.0447327	-0.0904938	-0.0480676	-0.00891895	-0.0264261	0.0491342	0.00708225	0.030154	0.148917	0.0621673	0.0248647	0.168704	-0.0442588
TCGA-CG-4436-01	-0.0763493	-0.0218943	-0.0247724	-0.0422795	-0.0231551	-0.0371841	0.00738972	-0.0427614	0.00752222	0.0937365	-0.00753007	0.060392	0.0954751	0.04305	-0.0037194	0.0344513	0.0761174	-0.0158161	-0.0552443	-0.0216208
TCGA-D7-8578-01	0.106649	-0.0360841	-0.00715246	-0.0248137	-0.0172229	-0.000119894	-0.0521248	-0.0155282	-0.0826441	-0.0704286	-0.0170149	0.00333372	-0.0724111	-0.0409417	-0.0290297	0.0320432	-0.0176073	-0.0496963	0.0501272	0.0190233
TCGA-D7-6528-01	-0.0412829	0.0224046	-0.00958862	-0.0508695	-0.0430881	0.0197615	-0.020766	0.0685849	-0.00560259	0.0145009	-0.00206213	0.0604062	0.0496537	0.0426726	0.424317	0.0876284	0.148609	0.155617	0.0404749	-0.0551106
TCGA-F1-6875-01	-0.0152363	-0.0635586	-0.00820355	-0.0462254	-0.0628209	0.0142502	0.0161474	0.013382	-0.027942	-0.0381231	-0.00503058	0.0111499	0.0363706	-0.00367315	-0.0216953	0.131094	0.239215	0.0733565	0.0582381	-0.0458285
TCGA-BR-8678-01	-0.0136842	0.0127294	-0.00483926	-0.0388362	-0.0471487	0.0292848	0.0863121	-0.0537718	-0.0368236	-0.0277711	-0.00286468	-0.0259876	0.150499	-0.0133162	0.0531557	0.140587	0.0791163	0.0514784	0.00991624	-0.0475077
TCGA-BR-8679-01	-0.0155495	0.0456855	-0.0168876	-0.0404209	-0.0310926	-5.4689e-05	0.0487759	-0.0545708	-0.0079092	-0.0154611	-0.0213859	-0.0016321	0.0500927	0.0252214	0.0184823	0.0827723	0.0697846	-0.018463	-0.0357157	-0.0211627
TCGA-VQ-A8DV-01	-0.0398021	-0.0903672	-0.0610879	-0.0630793	-0.0420627	-0.0518082	0.097487	0.0326272	0.077598	0.098712	-0.0169742	-0.00492675	-0.0176549	-0.0116392	-0.029993	0.0221103	0.0216882	-0.0474769	0.0860278	-0.0313969
TCGA-VQ-A91A-01	0.101744	-0.0454762	-0.00219571	-0.0214171	-0.0064852	-0.00521748	-0.0132581	-0.0322852	-0.0565228	-0.060206	-0.0177114	-0.0176072	-0.0245463	-0.018312	-0.0355637	0.00461968	-0.0319951	-0.0354405	0.00159393	-0.0475798
TCGA-VQ-A927-01	-0.0272767	-0.0202941	-0.018491	-0.0164114	-0.0526191	-0.00480551	0.000262937	-0.0575295	-0.0673284	-0.0520275	-0.0126582	-0.0326587	-0.0595906	0.0364173	-0.0518988	-0.0583069	-0.0772338	-0.076334	-0.0639596	0.20295
TCGA-KB-A93H-01	-0.0750763	-0.00514192	-0.0429	-0.0565833	-0.0611494	-0.0297503	0.166254	0.0375975	0.0877028	0.0989881	-0.0210942	-0.0237091	0.0182761	0.0425383	-0.0126971	0.0203278	0.0750743	-0.00435852	0.0193541	-0.0165999
TCGA-CG-5719-01	0.100383	-0.0222961	-0.00402083	-0.00434295	0.0190171	0.00217515	-0.0857097	0.0742117	0.00392747	-0.0108022	-0.00884196	-0.0110137	-0.0787171	-0.0218131	-0.0201896	-0.0423746	-0.00205208	0.025416	0.027319	0.013064
TCGA-CD-5800-01	-0.00272493	0.0148997	-0.0112806	-0.0358123	-0.0194415	-0.00113848	-0.0147709	0.123039	0.00503163	0.0725534	0.111258	0.031041	0.0290798	0.0249534	0.0251548	0.0767529	0.0986999	0.193031	0.0749463	-0.0296635
TCGA-KB-A93G-01	0.221462	-0.0575014	0.0112504	-0.00303622	0.0101025	-0.0116532	-0.0305639	-0.0695226	-0.0933608	-0.105912	-0.0312341	-0.0515599	-0.0750284	-0.0669044	-0.0552249	-0.025545	-0.0616339	-0.0887664	-0.0539042	-0.0273918
TCGA-KB-A6F7-01	-0.0290682	0.00753158	-0.000756825	0.00722056	0.038447	-0.0273535	-0.00840473	0.027202	0.0297086	0.0683334	-0.0112646	0.0288971	0.0601233	0.0236659	0.0208258	0.0468595	0.00838597	0.0750475	0.106454	-0.00839941
TCGA-IN-A6RJ-01	-0.0466137	-0.0320596	-0.0502677	-0.0587839	-0.0683774	0.453045	-0.087976	0.0316109	0.0339487	-0.00872916	-0.0159277	-0.0385225	-0.100718	-0.0194251	-0.0505492	-0.0870557	-0.0725045	-0.0587059	-0.0392515	-0.0462068
TCGA-IN-A6RN-01	-0.0479496	-0.0662782	-0.0429479	-0.046046	-0.0598557	0.00632303	-0.000451321	0.00388065	0.0124335	0.048027	-0.00752926	-0.0441911	-0.0720626	0.03222	0.0478981	-0.0642678	-0.0647417	-0.0606631	-0.0368299	0.169253
TCGA-FP-A9TM-01	-0.062396	-0.0166555	0.0345695	0.026224	-0.047384	-0.0208723	0.0642408	-0.069668	-0.0462408	-0.045039	-0.0140811	0.0214176	0.00451296	0.0302447	-0.039405	-0.0074361	-0.0399235	-0.0515897	-0.0164106	0.019709
TCGA-HU-A4H8-01	-0.0773946	0.0227269	-0.0261512	-0.0344101	-0.0344497	-0.0125116	0.0199011	-0.0511391	-0.0342068	-0.021473	-0.0173949	-0.0281867	0.0380003	0.0514983	-0.0249729	-0.0259532	-0.0531063	-0.0219459	-0.0376137	-0.025599
TCGA-IN-A6RO-01	-0.080882	0.0195204	-0.0301219	-0.0615126	-0.0536964	0.0108437	0.00336632	0.0217125	-0.0123333	0.057848	0.208328	0.0098196	0.100544	0.0751013	0.00267934	-0.0194329	-0.0282762	0.0675223	0.0493746	0.029304
TCGA-IN-AB1V-01	-0.0475013	-0.0373401	-0.028748	-0.0423683	-0.0634546	0.304696	0.00894846	-0.0594053	-0.0411087	-0.0605201	-0.00756808	-0.0347406	-0.0666714	-0.0055791	-0.0465235	-0.043965	-0.0809874	-0.0748971	-0.0447215	0.018117
TCGA-HU-A4GH-01	-0.0625983	-0.0456197	-0.0229947	-0.0502549	-0.0545755	0.000567092	0.0964796	0.00924801	-0.0793563	0.0358225	0.0399705	-0.0391739	-0.0236038	0.0581208	-0.0310695	0.00418944	0.0067683	-0.0171632	-0.0245897	0.00417186
TCGA-HU-8610-01	0.0336767	-0.00256774	0.0281827	0.0228882	0.0319604	0.00695658	-0.0133619	-0.0418237	-0.0652678	-0.0688186	-0.0113681	-0.0319654	-0.0232116	-0.00419646	-0.0250369	0.00968149	0.00529182	-0.0211487	-0.0246074	-0.0307466
TCGA-IN-A6RI-01	-0.0659475	-0.0207178	-0.0396174	-0.0462545	-0.0468213	-0.00806039	-0.000712392	0.08083	0.00952555	0.162981	-0.00605788	-0.0292862	0.0344099	0.0798672	0.0429693	0.0258698	0.0470293	0.0863044	-0.0247937	0.0606109
TCGA-IN-A6RS-01	-0.0416937	0.00798839	-0.0337716	-0.033428	-0.022634	-0.00557656	-0.0233384	0.0221436	0.0533721	0.0810096	0.0876011	-0.0273596	0.0103447	0.03062	0.307014	-0.0245347	0.0216115	0.0026611	-0.0847945	-0.0395024
TCGA-BR-8486-01	0.0198421	0.00656571	0.00343272	-0.00286529	-0.0174032	-0.0197233	0.0132051	-0.00811595	-0.0572868	-0.0192219	0.0294458	-0.0146231	-0.00585186	0.0249329	0.229381	0.0228208	-0.0086097	0.00875327	-0.0110281	-0.0153003
TCGA-HU-A4G9-01	-0.0940982	-0.0408336	-0.0385396	-0.0506221	-0.0679047	-0.0213246	-0.0350181	-0.0416637	0.00732535	-0.0246008	-0.0242891	-0.0331428	0.0291363	0.0715811	-0.0370149	-0.0494584	-0.0602892	-0.0143198	-0.0473564	0.0714699
TCGA-CG-4443-01	-0.0369251	-0.0742507	-0.0293813	-0.0512108	-0.0359463	-0.0177325	0.0157402	-0.0411373	-0.0478736	0.00905348	-0.015993	-0.0455164	0.00779334	0.0147484	0.0146346	0.109654	-0.000300882	-0.0118776	-0.0672421	-0.0233707
TCGA-VQ-A8PX-01	-0.0576481	0.00195511	-0.00370185	-0.0141643	-0.0430569	-0.00904197	0.0202456	-0.0430973	-0.0553245	-0.0401471	-0.0255752	-0.0212904	0.0163361	0.0738715	-0.0177865	0.0148191	0.000656515	-0.00507525	-0.0234687	0.0918292
TCGA-HF-7134-01	-0.0209817	-0.0239212	-0.0091132	-0.0253571	-0.0316328	0.000785754	-0.0537404	-0.0401968	-0.0537389	-0.064002	-0.0159172	0.00234202	0.0319589	0.0489164	0.363337	0.0261058	-0.00400365	0.0167974	-0.0178727	0.00208805
TCGA-CG-5726-01	-0.0671761	-0.0294946	-0.0313212	-0.057987	-0.0530127	-0.00333443	-0.0741983	0.0785018	0.0635497	0.00817377	-0.0154013	0.0443677	0.0409991	0.0684381	0.018125	0.0101938	0.0455105	0.146798	0.0502528	-0.00552919
TCGA-HU-8244-01	-0.0744317	-0.0608005	-0.0431053	-0.0636041	-0.0667899	-0.0231902	-0.0311796	0.0170358	0.0230866	-0.0183038	-0.0193161	-0.0306575	-0.0205892	0.0562008	-0.0370588	-0.0163841	-0.0103448	-0.0160646	0.110477	0.00622082
