# Supplementary material for: Candidate genes in gastric cancer identified by constructing a weighted gene co-expression network
Source: PeerJ. 2018 May 4;6:e4692. doi: 10.7717/peerj.4692 (PMC5937478; doi:10.7717/peerj.4692)
Supplement: Table S3 [file peerj-06-4692-s004.xlsx]

## Sheet: gm
Module	Number of genes	Gene
black	237	TBX3/HNF4A/ACSS1/SLC12A7/RNF43/NOL4L/SPATA2/ARFGEF2/GJB1/ABCF1/ARHGEF10L/TEX261/COPA/PTK7/CDX2/REEP5/GGT7/VIL1/INTS1/KIF3B/GPR56/ZMIZ2/SREBF2/RALGAPA2/NCSTN/SH3BP4/TRPC4AP/ATP11A/SLC1A5/C1orf115/PLXNB1/IRF2BP2/ETV4/AURKA/ACVR1B/IL22RA1/NCOA6/CTSA/SCAP/GGH/ATG9A/TSPAN6/SLC9A8/TM9SF4/BRPF3/RAE1/LAMP1/PPP1R10/PLAGL2/DDX27/LRP5/MYBL2/ADNP/TOMM34/ARFGAP1/PLEKHB1/FGFRL1/CHKA/PIGT/PTPN23/RAB15/RGL2/CPNE…
blue	682	CUL4A/KPNA2/KCTD3/KCTD12/IQGAP3/PPP3R1/HOOK1/NOL6/MCUR1/CDC16/LAPTM4B/CDCA8/TRIP13/CDKN3/ERMP1/PAPOLA/CTBP2/SNRNP200/FASN/UBE2N/GOLGA7/SPAG5/NCAPH/PROSER1/UGGT1/KIF4A/BUB1/SPRY4/MYB/TRIAP1/DCAF12/FANCI/CIAO1/SMG7/ODC1/ISOC1/SUZ12/GNL3/MYO1B/CDKN1B/ANLN/PRC1/LNX2/CD59/PITPNB/KIF2C/PCNP/CD46/GLO1/RNF6/PDP1/ITM2B/DLGAP5/PRPS1/THRAP3/MELK/CENPF/TFRC/HSP90B1/LRPPRC/CLUH/HJURP/SND1/CYB5B/STT3B/GPT2/TSN…
brown	402	DDX6/MGAT5/TMEM2/ARFGEF1/FAM89B/RBPJ/ACOX1/SPRED2/MED13/PFDN1/GABARAP/MFSD6/ARPP19/ZNF428/GPX4/OAZ1/RIN2/STK38/MRPL54/CUEDC2/SLC46A3/WDR83OS/LSM10/GSTM4/MGEA5/SH3GLB1/SORT1/IDH3G/ROCK2/WDR82/FAT1/DRAP1/AES/MPST/NIPAL2/NCKAP1/SNAPIN/BMPR2/TNKS2/IFNAR1/TAF7/LMO4/FCHO2/PTPRK/AFF4/PPDPF/PTPN11/NUDT14/TMEM50B/MAPK3/UBXN1/UBE2D2/KIAA1147/TRADD/FOXO3/CCDC167/AIP/TMF1/PRR7/ARHGAP5/HECTD1/TPR/PICALM/RBL2/…
cyan	117	WIPF1/TERF2IP/CD53/LAPTM5/FAS/HCLS1/ABI3/RGS1/ITGB2/PTPRC/ARHGDIB/JADE2/MPEG1/SASH3/LCP1/IK/ALOX5AP/EMP3/RASSF2/SMAP2/RFTN1/PLEK/EPS15/WAS/CYTIP/MYO9B/PTAFR/RHOG/C5AR1/SIPA1/CORO1A/BASP1/RAC2/MBD2/EHD1/NCF4/MOB3A/PSIP1/SERPINB9/UCP2/PLEKHA2/CD27/INPP5D/CD79A/RAB9A/STK17B/RFX5/PIK3AP1/LPXN/DNM1L/RGS19/LCK/IQSEC1/JAK1/SOCS1/SYK/LPAR5/PTPN6/FERMT3/UBA1/PRDM1/CD82/WNK1/RBM3/NFKB2/ADCY3/GNA13/TCF25/CA…
darkgreen	31	TOP2A/RAPGEFL1/KRT19/LASP1/PSMD3/NSF/ORMDL3/KRT10/PCGF2/ANO9/WIPF2/ATHL1/MLLT6/KRT20/GSDMB/RARA/MED24/GRB7/TNS4/ERBB2/JUP/PPP1R1B/ACLY/THRA/CDC6/EIF1/AATF/MIEN1/PIP4K2B/PGAP3/FKBP10
darkred	44	MUC20/SNX3/SEZ6L2/EPHB4/ZKSCAN1/PLOD3/TRIP6/LMTK2/TSC22D4/TAF6/ASPHD1/TRIM56/PON2/LAMTOR4/SLC25A13/PDAP1/AGFG2/ASNS/BAIAP2L1/TRRAP/MOSPD3/MEPCE/CYP3A5/POP7/AP1S1/ANAPC13/PPP1R35/GNB2/COPS6/ARPC1A/FIS1/GIGYF1/BRI3/MCM7/FAHD1/BUD31/ARPC1B/SHFM1/HPS1/SRI/SMURF1/ACHE/ZNHIT1/ATP5J2
green	506	SERPING1/MGP/C1S/C1R/LHFPL2/IL6ST/CCDC80/GNG11/ACKR1/PPAP2A/THBS4/FBLN5/EFEMP1/NRP1/EPB41L4B/GNAI2/TRIM2/RAMP3/CFH/MMRN2/A2M/PLXDC2/S1PR1/CTSO/LHFP/CDC42BPG/RAB31/IGFBP7/COL14A1/VIM/PTGIS/F2R/PODN/RASEF/MFAP5/HEYL/ADAMTS1/MAF/CLEC14A/CSGALNACT2/PECAM1/HEG1/RAMP2/PLBD2/DCN/LRRC32/GGT5/CHPF/MAP1LC3B/DEGS1/MARCKS/CYBRD1/EMILIN1/TMEM109/CDH11/CPA3/SERPINF1/MSMO1/COL8A1/TGFB1/ARID5A/FSTL1/C10orf10/CXC…
greenyellow	156	PPARD/FUT3/FUT6/PRSS22/PROM2/OVOL1/PVRL4/IDS/ALDH9A1/PTK6/SLPI/CAST/ALDH3A2/SLC3A2/EMP2/CAV2/ABLIM1/PTPRU/ARL4C/IL18/PERP/CNN2/CD9/SOWAHC/NAB2/ZNF385A/NT5E/CDH3/MDFI/TTC22/SEMA3F/EPHA2/EPS8L1/YBX3/MFSD10/FOXC1/GJB3/HK1/LIF/EPHA1/SLC2A1/HSPB1/DSP/PKP3/DSC2/MT2A/PI3/ITGB4/MCFD2/TRIP10/LAMA3/FAM129B/MXD1/RND3/MT1X/S100A14/ANO1/SPTBN2/PLEC/MT1G/MYEOV/SLC20A1/BHLHE40/ALDH3A1/TMEM132A/PRRG4/PXN/EHF/TAC…
grey	36	REG1A/OLFM4/SLC7A8/MSLN/SAP30/DPCR1/RARRES1/PTGER2/STEAP2/STEAP1/TFF2/RPS4Y1/ANXA10/BPIFB1/CAPZA2/FGFR2/AQP5/TES/HMGCS2/WFDC2/C8orf4/PSCA/ALDOB/MET/ANPEP/MSMB/ADH1C/DEPTOR/LURAP1L/PBLD/TM4SF4/ANXA13/MAOA/CLDN23/HBB/FCGBP
grey60	489	SLC52A2/FAM83H/TBRG4/PCYT2/CLDN3/FN3K/KCNK6/PPP1R16A/RPP25/DGAT1/PYCR1/ZC3H3/UBE2I/BRAT1/TECR/TSEN54/RTKN/REPIN1/RNH1/UQCRFS1/ADCK3/GRINA/EIF3B/SLC4A2/HGS/CC2D1A/HGH1/THEM6/TUBB4B/GIPC1/BCAR1/SLC5A6/PRAP1/HDGF/FASTK/NAPRT/CPSF1/CRAT/AGPAT2/AUP1/MRPL40/RECQL4/FBXL6/TPRN/SMARCD2/PTGES2/HNRNPA0/C8orf33/SCRIB/UBE2L3/NOXA1/GTF3C5/EIF4A3/HSF1/TSR3/OPLAH/TSTA3/ATP13A1/SLC44A2/STUB1/MROH6/PUF60/DDX56/GDF…
lightcyan	108	PIP4K2A/GIMAP4/GIMAP6/TRIM22/GIMAP7/IFI16/GMFG/LY86/PNRC1/FYB/CD2/LSP1/SELPLG/CECR1/EVI2B/CD3D/IL2RB/ETS1/CREBL2/LCP2/GPR183/CD3E/PIK3IP1/CD52/ITGAL/VCAM1/PPP1R18/SNX2/CD48/STAT5A/GPSM3/RAPGEF1/POLR3GL/SLAMF7/SLFN5/PTGDS/SLFN11/ITM2A/CCL19/ZNF703/TMSB4X/HR/BTG1/CXCL13/AKNA/CD37/CXCR4/SELL/CEP170B/DEF6/APOBEC3C/MZB1/IL27RA/CSF2RB/RALBP1/FDCSP/PLCD3/TP53INP1/CDC42SE2/LTB/TINF2/PIM2/DRAM2/GDE1/ERAP1…
lightgreen	86	ERGIC3/RRBP1/POR/ASCL2/STK35/EPHB2/LZTS3/ESPN/RALY/NCK2/BMP4/SMOX/HM13/TRIB3/PSMF1/CDC25B/APMAP/BIN1/EIF6/C2/ITPA/FAM50A/SSBP3/ARSE/SEC23B/TMEM176A/COMMD7/KIF12/MAVS/DDRGK1/ACAA2/VWA1/GSS/ABHD12/IDH3B/RNF145/CSNK2A1/XRN2/H1F0/NSFL1C/CST3/SUMF2/MUC6/FAM110A/SNX5/MGME1/TMEM176B/ZCCHC3/NXT1/SLC1A1/CHMP4B/CENPB/SNRPB/RHBDD2/GYLTL1B/MRPS26/ATP6V0E2/FLOT1/PCED1A/RBBP9/ADRBK1/RBM38/RBCK1/C7orf50/TSR2/BC…
lightyellow	82	CRLS1/RBM39/CCNL2/SPPL2B/CBX3/GGCT/GPCPD1/PRRC2C/SRSF6/VMP1/TARDBP/UPF3B/YWHAB/HNRNPH3/ZCRB1/PSMD1/GPATCH4/ESF1/ZC3H13/PNN/SLTM/RAB13/NUCKS1/THOC2/SEC62/TRA2A/EIF2S2/DPM1/PPIG/SRSF11/PHF14/OGT/CCNL1/SPRYD3/LSM5/CCAR1/RTF1/ANKRD10/CREBZF/NAA20/NCOR1/LUC7L3/DYNC1I2/PRPF38B/PABPN1/SRSF4/EIF5B/WSB1/LENG8/LRP10/TAF1D/WSB2/RBM25/HNRNPDL/NOP58/SYF2/CETN2/SNRPB2/EIF3J/SOX4/LINC00493/UPF2/FNBP4/PHACTR4/HN…
midnightblue	115	GBP2/SLC25A28/CARD16/STAT2/IL15RA/GBP1/SAMD9L/TNFSF10/RARRES3/APOL2/UBE2L6/TRIM21/CXCL9/CASP4/BST2/IFIT3/GBP4/BTN3A1/OPTN/LAP3/WARS/TAP2/STAT1/IDO1/ICAM1/IFIH1/BIRC3/LYSMD2/ODF3B/IRF1/CXCL10/CX3CL1/TYMP/OAS2/IFI44/HLA-E/PSMB10/NLRC5/CASP1/TRIB2/APOL1/ENC1/NUB1/APOL6/PARP14/PSME1/PML/CXCL11/PSMB9/MX1/CALCOCO2/PARP9/BTN3A2/TAP1/IFITM3/WDFY1/ETV7/RTP4/UBE2Z/JAK2/IFITM1/EIF2AK2/FBXO6/TAPBP/NMI/SCO2/I…
purple	168	CAMLG/THYN1/PTPRF/OGDH/NAP1L1/NSA2/SKP1/NDUFS4/MAGED1/CLTC/GALNT6/ARHGEF11/EIF3F/BTF3/NDUFAF2/HINT1/PFDN5/SLC5A1/LPIN2/AP3S1/IGF2R/RPS27L/MPZL1/TBCA/UBE2E1/RPS25/RPS23/C12orf57/ACSL1/ABHD4/RPL27/CDC42BPB/CHPT1/PYGB/CTNNA1/ZNF581/MRPS36/CHPF2/RPL35A/EEF1A1/RSL24D1/EEF2/ASAP2/TPPP/APP/RPL6/STAT3/EIF4B/GNS/PCDH1/RPL15/PLXNB2/RPL26L1/AGRN/SRCAP/CLSTN1/RPL10A/TMEM184B/DAG1/RPS27/KIAA0100/ANKRD11/GLTSC…
royalblue	46	FOXP4/POLR1C/MAD2L1BP/XPO5/GTPBP2/BYSL/YIPF3/MRPL2/PPP2R5D/MRPL14/BAG6/RRP36/PTP4A1/MRPS18A/VEGFA/ETS2/RPL7L1/TMEM63B/KLHDC3/EHMT2/ERV3-1/MRPS10/PEX6/MEA1/CNPY3/NFKBIE/DNPH1/HSP90AB1/VARS/CLIC1/MUC17/ATF6B/AGPAT1/PRRC2A/CLDN2/RNF5/C6orf48/SLC29A1/MTCH1/TBCC/PBX2/CCND3/ZFAND3/DDAH2/LSM2/C6orf89
salmon	130	PVRL2/EMC10/CEBPA/USF2/PPP2R1A/PPP1R15A/STRN4/GSK3A/ZNF579/TRAPPC6A/TOMM40/KDELR1/CLPTM1/HSPBP1/SIPA1L3/MBOAT7/CTSH/HIST1H1C/ATF5/PRCC/NFKBIB/FXYD5/EPN1/C2CD4B/BAX/SCAF1/FAM50B/CDC42EP4/NR1H2/ARL8A/CBLC/SNRPD2/SUPT5H/TRIM28/MED25/IRF2BP1/JOSD2/CST1/MRPS12/PRMT1/EIF3K/SDHAF1/CRTC2/HNRNPUL1/PAF1/ACTN4/SYMPK/ECH1/PRKD2/SNRPA/SAMD4B/RUVBL2/NAPA/PSENEN/FBRS/TBC1D17/PPP6R1/FBXO46/SF3B4/CKAP4/SPINT2/DED…
tan	152	AIF1/MS4A6A/MS4A7/MLLT4/RNASE6/VAMP5/HCST/TNFSF13B/APOL3/SRGN/PLEKHO2/C1orf162/LY96/TYROBP/CCL5/MSN/MAFB/C1QA/CD4/C3AR1/C1QC/FPR3/NKG7/GM2A/C1QB/HLA-DPB1/CYBB/FOLR2/TMEM140/HLA-DPA1/HLA-DMB/SH2B3/FCGR2A/CSF1R/SPI1/PLA2G7/RGS10/FAM26F/SLC15A3/HLA-DOA/HLA-DQA1/FCER1G/SLAMF8/HLA-DRA/SAMHD1/LIPA/GPNMB/CD74/TREM2/VSIG4/HLA-DQB1/B2M/CCL4/CD163/CTSC/HLA-DRB1/GZMA/C5orf15/TCN2/CTSL/AKR1B1/SLCO2B1/MGAT1/C…
turquoise	1090	GNB4/GYPC/GLIPR2/LIX1L/SH3BGRL/PJA2/MBNL1/PAIP2/EPS8L3/PLEKHO1/LLGL2/SOX9/WWTR1/PRR15L/TMEM125/GUCY1A3/ISCU/PRSS3/C6orf136/RAP1A/ZBTB7B/FBXL5/ZCCHC24/TMEM214/EFNA1/AXL/FGL2/F11R/MYO10/KDELC2/GALE/KIAA1522/RAB12/GUCY1B3/RGS2/STX3/CRTAP/CRIM1/GPRC5C/PARVA/TMEM63A/GYG1/PNMA1/AOC3/EFNA4/CCDC69/PRELP/STOM/CGN/CORO1C/KLHL5/TRAF4/SPARCL1/CLIC4/C1RL/TXNIP/SPON1/PRR15/EPN3/ENTPD6/SLC44A3/ARL6IP1/CNKSR1/AS…
yellow	323	PPP1R11/AMFR/C14orf1/ZMAT2/UBE2B/VPS29/GABARAPL2/MINK1/PSMG3/SRP14/CKLF/CSNK1A1/MEAF6/NFU1/PGRMC2/PPIA/MRPL33/ATP6V1E1/CD44/MAFK/TLCD1/MTX2/SEC61B/COA3/NOTCH1/COA6/SPTSSA/FAM171A1/COX5B/ROMO1/TMSB10/ITPRIPL2/WDR6/TTC1/SEC16A/TRPT1/CSNK2B/MYOF/NFE2L1/PARL/MYO1D/LDHA/CAT/PSMB3/DBI/FUCA2/NDUFB5/AFF1/SFTA2/RPF1/MGST3/TRMT112/PSMB1/ATP6V0E1/HSPE1/ARPC3/PARK7/ZFP36L2/COX5A/NDUFS6/CDC42/DARS/FOSL2/RHEB/…
