# Supplementary material for: Candidate genes in gastric cancer identified by constructing a weighted gene co-expression network
Source: PeerJ. 2018 May 4;6:e4692. doi: 10.7717/peerj.4692 (PMC5937478; doi:10.7717/peerj.4692)
Supplement: Table S5 [file peerj-06-4692-s006.xlsx]

## Sheet: MF
Module	ID	Description	GeneRatio	BgRatio	pvalue	p.adjust	qvalue	geneID	Count
black.GO:0005007	GO:0005007	fibroblast growth factor-activated receptor activity	3/214	5/15711	2.44235e-05	0.0129689	0.0114405	FGFRL1/FGFR4/FGFR3	3
black.GO:0003713	GO:0003713	transcription coactivator activity	13/214	285/15711	0.000148941	0.0395438	0.0348835	ZMIZ2/NCOA6/MED12/TRIM24/ATXN7L3/ASXL1/HCFC1/TCF20/PRPF6/TAF11/CTNNB1/SMARCC2/FHL2	13
blue.GO:0043566	GO:0043566	structure-specific DNA binding	36/639	236/15711	6.67673e-12	6.10921e-09	4.83536e-09	LRPPRC/XRCC5/FEN1/HMGN4/CEBPG/EZH2/LSM14A/HNRNPK/SMARCC1/HNRNPA1/HMGB3/HMGB1/RPA2/HMGN2/MCM4/HNRNPA2B1/WBP2/RCC1/RAD51AP1/MTA2/HMGN1/HSPD1/HNRNPC/TDP2/H2AFZ/MCM6/RPA1/FUBP1/WBP11/HMGB2/LONP1/CTCF/HDAC1/RBBP4/YY1/XRCC6	36
blue.GO:0003697	GO:0003697	single-stranded DNA binding	16/639	73/15711	2.82858e-08	1.03692e-05	8.2071e-06	LRPPRC/HNRNPK/HNRNPA1/HMGB1/RPA2/MCM4/HNRNPA2B1/RAD51AP1/HSPD1/TDP2/MCM6/RPA1/FUBP1/WBP11/HMGB2/LONP1	16
blue.GO:0008536	GO:0008536	Ran GTPase binding	10/639	26/15711	3.39974e-08	1.03692e-05	8.2071e-06	TNPO1/BIRC5/XPO1/TNPO2/XPOT/IPO7/XPO6/KPNB1/XPO7/IPO5	10
blue.GO:0031492	GO:0031492	nucleosomal DNA binding	10/639	28/15711	7.80134e-08	1.78456e-05	1.41245e-05	HMGN4/SMARCC1/HMGN2/RCC1/MTA2/HMGN1/HNRNPC/H2AFZ/HDAC1/RBBP4	10
blue.GO:0016887	GO:0016887	ATPase activity	38/639	376/15711	2.32188e-07	3.96299e-05	3.13665e-05	SNRNP200/KIF4A/KIF2C/KIF18B/XRCC5/DDX18/RFC3/ATAD2/OLA1/ATP7B/DHX9/WRNIP1/ACIN1/ABCF2/CHD1L/DDX54/MCM4/KIF11/ATP6V1C1/KIFC1/DHX15/HSPD1/NBN/MCM6/KIF20A/CCT8/LONP1/ABCE1/SMARCA5/DDX1/IDE/RBBP4/ATP6V1A/XRCC6/ATP5B/DDX21/G3BP1/DDX23	38
blue.GO:0031491	GO:0031491	nucleosome binding	11/639	39/15711	2.73911e-07	3.96299e-05	3.13665e-05	HMGN4/SMARCC1/HMGN2/RCC1/MTA2/HMGN1/HNRNPC/H2AFZ/SMARCA5/HDAC1/RBBP4	11
blue.GO:0003682	GO:0003682	chromatin binding	40/639	411/15711	3.03179e-07	3.96299e-05	3.13665e-05	MYB/SUZ12/CENPF/UBE2T/TCF3/HMGN4/STAG2/PELP1/EZH2/BAZ1B/RAN/SMARCC1/KDM1A/CDCA5/HMGN2/SHMT2/PRMT5/WBP2/RCC1/TLE1/MTA2/HMGN1/SMC3/HNRNPC/SMC1A/H2AFZ/RPA1/WAC/SSRP1/SMARCA5/CTCF/POLR2B/MCMBP/DDX1/HDAC1/TFAM/RBBP4/DNMT1/BRD2/KIAA0101	40
blue.GO:0004812	GO:0004812	aminoacyl-tRNA ligase activity	11/639	42/15711	6.25863e-07	5.72665e-05	4.53257e-05	DARS2/EPRS/IARS2/YARS/LARS/KARS/IARS/FARSB/RARS2/AARS/RARS	11
blue.GO:0016875	GO:0016875	ligase activity, forming carbon-oxygen bonds	11/639	42/15711	6.25863e-07	5.72665e-05	4.53257e-05	DARS2/EPRS/IARS2/YARS/LARS/KARS/IARS/FARSB/RARS2/AARS/RARS	11
blue.GO:0016876	GO:0016876	ligase activity, forming aminoacyl-tRNA and related compounds	11/639	42/15711	6.25863e-07	5.72665e-05	4.53257e-05	DARS2/EPRS/IARS2/YARS/LARS/KARS/IARS/FARSB/RARS2/AARS/RARS	11
blue.GO:0003724	GO:0003724	RNA helicase activity	9/639	29/15711	1.3878e-06	0.000114082	9.02941e-05	SNRNP200/DDX18/DHX9/DDX54/DHX15/DDX1/DDX21/G3BP1/DDX23	9
blue.GO:0003678	GO:0003678	DNA helicase activity	11/639	46/15711	1.68176e-06	0.000114082	9.02941e-05	XRCC5/MCM3/DHX9/CHD1L/MCM4/NBN/MCM5/MCM6/MCM2/XRCC6/G3BP1	11
blue.GO:0008026	GO:0008026	ATP-dependent helicase activity	15/639	86/15711	1.74551e-06	0.000114082	9.02941e-05	SNRNP200/XRCC5/DDX18/DHX9/CHD1L/DDX54/MCM4/DHX15/NBN/MCM6/DDX1/XRCC6/DDX21/G3BP1/DDX23	15
blue.GO:0070035	GO:0070035	purine NTP-dependent helicase activity	15/639	86/15711	1.74551e-06	0.000114082	9.02941e-05	SNRNP200/XRCC5/DDX18/DHX9/CHD1L/DDX54/MCM4/DHX15/NBN/MCM6/DDX1/XRCC6/DDX21/G3BP1/DDX23	15
blue.GO:0031490	GO:0031490	chromatin DNA binding	13/639	68/15711	2.94262e-06	0.0001795	0.000142072	HMGN4/EZH2/SMARCC1/HMGN2/WBP2/RCC1/MTA2/HMGN1/HNRNPC/H2AFZ/CTCF/HDAC1/RBBP4	13
blue.GO:0003727	GO:0003727	single-stranded RNA binding	11/639	50/15711	4.06057e-06	0.000232214	0.000183794	PATL1/PABPC1/PTBP1/LSM14A/HNRNPA1/KHDRBS1/HNRNPC/HNRNPF/SYNCRIP/LONP1/DDX1	11
blue.GO:0003743	GO:0003743	translation initiation factor activity	11/639	51/15711	4.98914e-06	0.000254293	0.000201269	MTIF2/DENR/EIF3A/EIF3L/EIF2S3/EIF3H/EIF4G1/EIF1AX/EIF2S1/EIF3D/EIF3E	11
blue.GO:0008135	GO:0008135	translation factor activity, nucleic acid binding	14/639	82/15711	5.00248e-06	0.000254293	0.000201269	MTIF2/ETF1/DENR/EIF3A/EIF3L/EIF2S3/EIF3H/GCN1L1/EIF4G1/EIF1AX/EIF2S1/EIF3D/EIF3E/GSPT1	14
blue.GO:0004386	GO:0004386	helicase activity	19/639	145/15711	6.65589e-06	0.000320533	0.000253698	SNRNP200/XRCC5/DDX18/MCM3/DHX9/CHD1L/DDX54/MCM4/DHX15/NBN/MCM5/MCM6/MCM2/SMARCA5/DDX1/XRCC6/DDX21/G3BP1/DDX23	19
blue.GO:0008134	GO:0008134	transcription factor binding	39/639	453/15711	8.59637e-06	0.000393284	0.000311279	THRAP3/CENPF/MED14/USP7/YWHAZ/TCF3/HES6/PRKDC/PELP1/MYBBP1A/NPM1/CEBPG/DHX9/CAND1/PPID/KDM1A/HMGB1/MTDH/TLE1/MTA2/NBN/NR0B2/TFDP1/MED30/SNW1/RB1/C1QBP/DRG1/CNOT1/NAB1/HNRNPF/MED4/NIF3L1/GMNN/MYC/VHL/HDAC1/DNMT1/UBA2	39
blue.GO:0008139	GO:0008139	nuclear localization sequence binding	5/639	9/15711	1.20493e-05	0.000523182	0.000414092	KPNA2/TNPO1/TNPO2/KPNA3/KPNB1	5
blue.GO:0004004	GO:0004004	ATP-dependent RNA helicase activity	7/639	21/15711	1.25792e-05	0.000523182	0.000414092	SNRNP200/DDX18/DHX9/DDX54/DDX21/G3BP1/DDX23	7
blue.GO:0051082	GO:0051082	unfolded protein binding	15/639	101/15711	1.35599e-05	0.000539447	0.000426965	UGGT1/HSP90B1/TOMM20/CANX/NAP1L4/NPM1/CCT5/ST13/HSPD1/CCT6A/PTGES3/CCT8/HSPA9/CCT4/TRAP1	15
blue.GO:0008186	GO:0008186	RNA-dependent ATPase activity	7/639	23/15711	2.47006e-05	0.000926839	0.000733581	SNRNP200/DDX18/DHX9/DDX54/DDX21/G3BP1/DDX23	7
blue.GO:0042393	GO:0042393	histone binding	17/639	132/15711	2.53235e-05	0.000926839	0.000733581	SUZ12/HJURP/PSME4/NPM1/BAZ1B/NCAPD2/DEK/ANP32B/IPO7/RCC1/ANP32E/KDM4A/MCM2/SMARCA5/RBBP4/NASP/BRD2	17
blue.GO:0019238	GO:0019238	cyclohydrolase activity	4/639	6/15711	3.8091e-05	0.00131823	0.00104336	ATIC/MTHFD1/NIF3L1/MTHFD2	4
blue.GO:0003725	GO:0003725	double-stranded RNA binding	10/639	52/15711	3.89013e-05	0.00131823	0.00104336	TFRC/YRDC/LSM14A/ILF2/MTDH/DHX15/HSPD1/ILF3/DDX1/DDX21	10
blue.GO:0004003	GO:0004003	ATP-dependent DNA helicase activity	8/639	33/15711	4.03393e-05	0.00131823	0.00104336	XRCC5/DHX9/CHD1L/MCM4/NBN/MCM6/XRCC6/G3BP1	8
blue.GO:0008565	GO:0008565	protein transporter activity	12/639	79/15711	7.79482e-05	0.0024594	0.00194658	KPNA2/TOMM20/XPO1/VPS26A/AP2B1/KPNA3/TOMM70A/XPO6/TOMM22/KPNB1/XPO7/IPO5	12
blue.GO:0043021	GO:0043021	ribonucleoprotein complex binding	11/639	68/15711	8.57502e-05	0.00261538	0.00207004	MTIF2/ETF1/OLA1/NPM1/PRMT5/UHMK1/GUF1/PES1/C1QBP/EIF2S1/SRP72	11
blue.GO:0000049	GO:0000049	tRNA binding	8/639	37/15711	9.71537e-05	0.0028676	0.00226967	DARS2/NSUN2/YARS/XPOT/KARS/SSB/AARS/RARS	8
blue.GO:0008187	GO:0008187	poly-pyrimidine tract binding	5/639	13/15711	0.000107411	0.00307127	0.00243087	PATL1/PABPC1/PTBP1/KHDRBS1/HNRNPC	5
blue.GO:0003684	GO:0003684	damaged DNA binding	9/639	52/15711	0.0002209	0.0059521	0.00471101	XRCC5/FEN1/DDB1/HMGB1/RPA2/NBN/RPA1/HMGB2/XRCC6	9
blue.GO:0042162	GO:0042162	telomeric DNA binding	5/639	15/15711	0.000234181	0.0059521	0.00471101	XRCC5/NCL/HNRNPA2B1/XRCC6/HNRNPD	5
blue.GO:0042809	GO:0042809	vitamin D receptor binding	5/639	15/15711	0.000234181	0.0059521	0.00471101	THRAP3/MED14/MED30/SNW1/MED4	5
blue.GO:0070717	GO:0070717	poly-purine tract binding	5/639	15/15711	0.000234181	0.0059521	0.00471101	PATL1/PABPC1/KHDRBS1/SYNCRIP/DDX1	5
blue.GO:0002161	GO:0002161	aminoacyl-tRNA editing activity	4/639	9/15711	0.000290031	0.00698363	0.00552746	IARS2/LARS/IARS/AARS	4
blue.GO:0017056	GO:0017056	structural constituent of nuclear pore	4/639	9/15711	0.000290031	0.00698363	0.00552746	NDC1/NUP205/NUP153/NUP98	4
blue.GO:0042623	GO:0042623	ATPase activity, coupled	23/639	262/15711	0.000453143	0.0106314	0.00841464	SNRNP200/XRCC5/DDX18/RFC3/ATP7B/DHX9/CHD1L/DDX54/MCM4/ATP6V1C1/DHX15/NBN/MCM6/CCT8/LONP1/DDX1/RBBP4/ATP6V1A/XRCC6/ATP5B/DDX21/G3BP1/DDX23	23
blue.GO:0016874	GO:0016874	ligase activity	32/639	419/15711	0.000487204	0.0111448	0.00882096	UBE2N/RNF6/DARS2/UBE2T/UBE2R2/EPRS/IARS2/UBE3C/UBE2D3/SUCLA2/YARS/ADSS/LARS/GART/CAD/RTCB/KARS/TRIM25/ZFP91/WWP1/IARS/UBE2G1/MTHFD1/PAICS/UBA3/FARSB/UBE2K/RARS2/SLC27A2/AARS/UBA2/RARS	32
blue.GO:0003729	GO:0003729	mRNA binding	13/639	110/15711	0.000521187	0.0116314	0.00920607	TSN/GRSF1/SRSF1/NUDT21/TYMS/LARP1/SSB/HNRNPC/C1QBP/SLBP/KHSRP/G3BP1/SERBP1	13
blue.GO:0016879	GO:0016879	ligase activity, forming carbon-nitrogen bonds	13/639	111/15711	0.000568872	0.0123933	0.00980913	UBE2N/UBE2T/UBE2R2/UBE2D3/ADSS/GART/CAD/TRIM25/UBE2G1/MTHFD1/PAICS/UBA3/UBE2K	13
blue.GO:0008094	GO:0008094	DNA-dependent ATPase activity	10/639	72/15711	0.000635385	0.0135204	0.0107012	XRCC5/RFC3/DHX9/CHD1L/MCM4/NBN/MCM6/RBBP4/XRCC6/G3BP1	10
blue.GO:0048037	GO:0048037	cofactor binding	22/639	258/15711	0.000880799	0.0183166	0.0144974	CTBP2/FASN/GPT2/BIRC5/LDHB/FOXRED2/IVD/KDM1A/DLD/NNT/SORD/TYMS/SHMT2/KDM1B/DECR1/VKORC1L1/SPTLC1/HADHA/GOT2/HADHB/HADH/PSAT1	22
blue.GO:0008143	GO:0008143	poly(A) binding	4/639	12/15711	0.00103324	0.0205525	0.016267	PABPC1/KHDRBS1/SYNCRIP/DDX1	4
blue.GO:0008266	GO:0008266	poly(U) RNA binding	4/639	12/15711	0.00103324	0.0205525	0.016267	PATL1/PABPC1/KHDRBS1/HNRNPC	4
blue.GO:0032453	GO:0032453	histone demethylase activity (H3-K4 specific)	3/639	6/15711	0.00122143	0.0237789	0.0188207	KDM5C/KDM1A/KDM1B	3
blue.GO:0036002	GO:0036002	pre-mRNA binding	4/639	13/15711	0.00144472	0.02754	0.0217975	PTBP1/RBM22/HNRNPA2B1/SLBP	4
blue.GO:0005048	GO:0005048	signal sequence binding	5/639	22/15711	0.00162123	0.0290643	0.023004	KPNA2/TNPO1/TNPO2/KPNA3/KPNB1	5
blue.GO:0004822	GO:0004822	isoleucine-tRNA ligase activity	2/639	2/15711	0.00165174	0.0290643	0.023004	IARS2/IARS	2
blue.GO:0016418	GO:0016418	S-acetyltransferase activity	2/639	2/15711	0.00165174	0.0290643	0.023004	FASN/DLAT	2
blue.GO:0016509	GO:0016509	long-chain-3-hydroxyacyl-CoA dehydrogenase activity	2/639	2/15711	0.00165174	0.0290643	0.023004	HADHA/HADHB	2
blue.GO:0035257	GO:0035257	nuclear hormone receptor binding	13/639	132/15711	0.00281143	0.048537	0.0384164	RNF6/THRAP3/MED14/RAN/PPID/KDM1A/DDX54/NR0B2/MED30/SNW1/RB1/CNOT1/MED4	13
brown.GO:0017048	GO:0017048	Rho GTPase binding	9/346	65/15711	1.18476e-05	0.00808005	0.0067843	ROCK2/NCKAP1/PFN1/FMNL2/BRK1/CDC42EP5/CDC42EP2/ROCK1/IQGAP1	9
brown.GO:0016667	GO:0016667	oxidoreductase activity, acting on a sulfur group of donors	7/346	46/15711	6.04451e-05	0.0206118	0.0173064	PCYOX1/TXN2/MSRB1/SH3BGRL3/GLRX5/GSTK1/MSRB2	7
brown.GO:0017016	GO:0017016	Ras GTPase binding	13/346	185/15711	0.000236445	0.040525	0.0340263	ROCK2/NCKAP1/PFN1/FMNL2/BRK1/RILP/CDC42EP5/RANBP2/SYTL2/RANBP9/CDC42EP2/ROCK1/IQGAP1	13
brown.GO:0051020	GO:0051020	GTPase binding	14/346	210/15711	0.000237683	0.040525	0.0340263	ROCK2/NCKAP1/PFN1/FMNL2/BRK1/RILP/GOLGA4/CDC42EP5/RANBP2/SYTL2/RANBP9/CDC42EP2/ROCK1/IQGAP1	14
cyan.GO:0019900	GO:0019900	kinase binding	17/109	475/15711	2.7869e-08	5.98622e-06	4.38876e-06	FAS/HCLS1/ITGB2/PTPRC/PLEK/WAS/LCK/SOCS1/SYK/PTPN6/PTK2B/PTPN1/PTPRJ/TWF2/DUSP2/GRB2/NEK6	17
cyan.GO:0019901	GO:0019901	protein kinase binding	16/109	426/15711	3.82506e-08	5.98622e-06	4.38876e-06	HCLS1/ITGB2/PTPRC/PLEK/WAS/LCK/SOCS1/SYK/PTPN6/PTK2B/PTPN1/PTPRJ/TWF2/DUSP2/GRB2/NEK6	16
cyan.GO:0004715	GO:0004715	non-membrane spanning protein tyrosine kinase activity	6/109	45/15711	6.34574e-07	6.62072e-05	4.85393e-05	LCK/JAK1/SYK/PTK2B/TYK2/CSK	6
cyan.GO:0003779	GO:0003779	actin binding	13/109	376/15711	2.01611e-06	0.000157761	0.000115661	WIPF1/HCLS1/LCP1/WAS/MYO9B/CORO1A/CAP1/MYO1E/ARPC2/PPP1R9B/TWF2/ACTR3/WDR1	13
cyan.GO:0004721	GO:0004721	phosphoprotein phosphatase activity	8/109	168/15711	2.19789e-05	0.00133559	0.000979181	PTPRC/LCK/PTPN6/PTPN18/PTPN1/PTPRJ/SBF1/DUSP2	8
cyan.GO:0030695	GO:0030695	GTPase regulator activity	10/109	296/15711	3.98624e-05	0.00133559	0.000979181	RGS1/ARHGDIB/SMAP2/WAS/MYO9B/SIPA1/RGS19/ARHGEF1/GMIP/ARHGAP4	10
cyan.GO:0019902	GO:0019902	phosphatase binding	7/109	134/15711	4.05774e-05	0.00133559	0.000979181	LCK/JAK1/WNK1/SHOC2/PPP1R9B/CSK/GRB2	7
cyan.GO:0008047	GO:0008047	enzyme activator activity	12/109	429/15711	4.21906e-05	0.00133559	0.000979181	RGS1/ARHGDIB/ALOX5AP/SMAP2/MYO9B/SIPA1/NCF4/RGS19/ARHGEF1/STK4/GMIP/ARHGAP4	12
cyan.GO:0019903	GO:0019903	protein phosphatase binding	6/109	92/15711	4.26708e-05	0.00133559	0.000979181	LCK/JAK1/SHOC2/PPP1R9B/CSK/GRB2	6
cyan.GO:0051015	GO:0051015	actin filament binding	6/109	92/15711	4.26708e-05	0.00133559	0.000979181	LCP1/MYO9B/CORO1A/MYO1E/ARPC2/ACTR3	6
cyan.GO:0005096	GO:0005096	GTPase activator activity	9/109	252/15711	6.4352e-05	0.00170337	0.00124881	RGS1/ARHGDIB/SMAP2/MYO9B/SIPA1/RGS19/ARHGEF1/GMIP/ARHGAP4	9
cyan.GO:0060589	GO:0060589	nucleoside-triphosphatase regulator activity	10/109	316/15711	6.8995e-05	0.00170337	0.00124881	RGS1/ARHGDIB/SMAP2/WAS/MYO9B/SIPA1/RGS19/ARHGEF1/GMIP/ARHGAP4	10
cyan.GO:0016791	GO:0016791	phosphatase activity	9/109	257/15711	7.48402e-05	0.00170337	0.00124881	PTPRC/INPP5D/LCK/PTPN6/PTPN18/PTPN1/PTPRJ/SBF1/DUSP2	9
cyan.GO:0004725	GO:0004725	protein tyrosine phosphatase activity	6/109	102/15711	7.6189e-05	0.00170337	0.00124881	PTPRC/PTPN6/PTPN18/PTPN1/PTPRJ/DUSP2	6
cyan.GO:0017124	GO:0017124	SH3 domain binding	6/109	117/15711	0.000162713	0.00339528	0.00248923	HCLS1/EPS15/WAS/INPP5D/PTPN6/GRB2	6
cyan.GO:0005083	GO:0005083	small GTPase regulator activity	7/109	182/15711	0.000275094	0.00538153	0.00394543	ARHGDIB/SMAP2/WAS/MYO9B/SIPA1/GMIP/ARHGAP4	7
cyan.GO:0004713	GO:0004713	protein tyrosine kinase activity	6/109	137/15711	0.000382351	0.00685903	0.00502865	LCK/JAK1/SYK/PTK2B/TYK2/CSK	6
cyan.GO:0043548	GO:0043548	phosphatidylinositol 3-kinase binding	3/109	21/15711	0.000394449	0.00685903	0.00502865	CORO1A/PIK3AP1/LCK	3
cyan.GO:0005131	GO:0005131	growth hormone receptor binding	2/109	5/15711	0.000470483	0.00775058	0.00568228	JAK1/TYK2	2
cyan.GO:0042578	GO:0042578	phosphoric ester hydrolase activity	9/109	349/15711	0.000720399	0.0112742	0.00826563	PTPRC/INPP5D/LCK/PTPN6/PTPN18/PTPN1/PTPRJ/SBF1/DUSP2	9
cyan.GO:0003924	GO:0003924	GTPase activity	7/109	216/15711	0.000767012	0.0114321	0.00838138	RHOG/RAC2/EHD1/RAB9A/DNM1L/GNA13/GNL3L	7
cyan.GO:0031702	GO:0031702	type 1 angiotensin receptor binding	2/109	8/15711	0.00129952	0.0184887	0.0135548	GNA13/TYK2	2
cyan.GO:0031701	GO:0031701	angiotensin receptor binding	2/109	9/15711	0.00166325	0.0226347	0.0165945	GNA13/TYK2	2
cyan.GO:0005100	GO:0005100	Rho GTPase activator activity	3/109	38/15711	0.00229669	0.0299526	0.0219596	MYO9B/GMIP/ARHGAP4	3
cyan.GO:0001784	GO:0001784	phosphotyrosine binding	2/109	13/15711	0.00353899	0.0443082	0.0324842	PTPN6/GRB2	2
darkgreen.GO:0019900	GO:0019900	kinase binding	43281	475/15711	0.000236892	0.0369551	0.0204475	TOP2A/NSF/RARA/GRB7/JUP/CDC6	6
darkgreen.GO:0008144	GO:0008144	drug binding	43189	91/15711	0.000681473	0.0425544	0.0235456	TOP2A/RARA/FKBP10	3
darkgreen.GO:0003682	GO:0003682	chromatin binding	43250	411/15711	0.00099304	0.0425544	0.0235456	TOP2A/PCGF2/RARA/THRA/CDC6	5
darkgreen.GO:0019901	GO:0019901	protein kinase binding	43250	426/15711	0.00116543	0.0425544	0.0235456	TOP2A/NSF/RARA/GRB7/JUP	5
darkgreen.GO:0001042	GO:0001042	RNA polymerase I core binding	43130	1/15711	0.00190949	0.0425544	0.0235456	ERBB2	1
darkgreen.GO:0002153	GO:0002153	steroid receptor RNA activator RNA binding	43130	1/15711	0.00190949	0.0425544	0.0235456	THRA	1
darkgreen.GO:0005199	GO:0005199	structural constituent of cell wall	43130	1/15711	0.00190949	0.0425544	0.0235456	JUP	1
darkgreen.GO:0003878	GO:0003878	ATP citrate synthase activity	43130	2/15711	0.00381546	0.0475291	0.0262981	ACLY	1
darkgreen.GO:0031749	GO:0031749	D2 dopamine receptor binding	43130	2/15711	0.00381546	0.0475291	0.0262981	PPP1R1B	1
darkgreen.GO:0031751	GO:0031751	D4 dopamine receptor binding	43130	2/15711	0.00381546	0.0475291	0.0262981	PPP1R1B	1
darkgreen.GO:0004879	GO:0004879	ligand-activated sequence-specific DNA binding RNA polymerase II transcription factor activity	2/30	49/15711	0.00392043	0.0475291	0.0262981	RARA/THRA	2
darkgreen.GO:0098531	GO:0098531	direct ligand regulated sequence-specific DNA binding transcription factor activity	2/30	49/15711	0.00392043	0.0475291	0.0262981	RARA/THRA	2
darkgreen.GO:0005070	GO:0005070	SH3/SH2 adaptor activity	2/30	50/15711	0.00407896	0.0475291	0.0262981	LASP1/GRB7	2
darkgreen.GO:0003707	GO:0003707	steroid hormone receptor activity	2/30	55/15711	0.00491553	0.0475291	0.0262981	RARA/THRA	2
darkgreen.GO:0004775	GO:0004775	succinate-CoA ligase (ADP-forming) activity	43130	3/15711	0.0057179	0.0475291	0.0262981	ACLY	1
darkgreen.GO:0016309	GO:0016309	1-phosphatidylinositol-5-phosphate 4-kinase activity	43130	3/15711	0.0057179	0.0475291	0.0262981	PIP4K2B	1
darkgreen.GO:0031750	GO:0031750	D3 dopamine receptor binding	43130	3/15711	0.0057179	0.0475291	0.0262981	PPP1R1B	1
darkgreen.GO:0031752	GO:0031752	D5 dopamine receptor binding	43130	3/15711	0.0057179	0.0475291	0.0262981	PPP1R1B	1
darkgreen.GO:0035591	GO:0035591	signaling adaptor activity	2/30	65/15711	0.00680416	0.0475291	0.0262981	LASP1/GRB7	2
darkgreen.GO:0031490	GO:0031490	chromatin DNA binding	2/30	68/15711	0.00742551	0.0475291	0.0262981	RARA/THRA	2
darkgreen.GO:0003918	GO:0003918	DNA topoisomerase type II (ATP-hydrolyzing) activity	43130	4/15711	0.00761684	0.0475291	0.0262981	TOP2A	1
darkgreen.GO:0004774	GO:0004774	succinate-CoA ligase activity	43130	4/15711	0.00761684	0.0475291	0.0262981	ACLY	1
darkgreen.GO:0043125	GO:0043125	ErbB-3 class receptor binding	43130	4/15711	0.00761684	0.0475291	0.0262981	ERBB2	1
darkgreen.GO:0044323	GO:0044323	retinoic acid-responsive element binding	43130	4/15711	0.00761684	0.0475291	0.0262981	RARA	1
darkgreen.GO:0061505	GO:0061505	DNA topoisomerase II activity	43130	4/15711	0.00761684	0.0475291	0.0262981	TOP2A	1
greenyellow.GO:0050839	GO:0050839	cell adhesion molecule binding	9/147	165/15711	2.49405e-05	0.00883372	0.00635207	EMP2/CD9/DSP/PKP3/PXN/NDRG1/ADAM8/ITGA3/PVRL1	9
greenyellow.GO:0005504	GO:0005504	fatty acid binding	4/147	25/15711	7.98628e-05	0.00883372	0.00635207	PPARD/S100A9/FABP5/S100A8	4
greenyellow.GO:0004029	GO:0004029	aldehyde dehydrogenase (NAD) activity	3/147	10/15711	9.17789e-05	0.00883372	0.00635207	ALDH9A1/ALDH3A2/ALDH3A1	3
greenyellow.GO:0036041	GO:0036041	long-chain fatty acid binding	3/147	10/15711	9.17789e-05	0.00883372	0.00635207	PPARD/S100A9/S100A8	3
greenyellow.GO:0008426	GO:0008426	protein kinase C inhibitor activity	2/147	3/15711	0.000259257	0.0142591	0.0102533	HSPB1/SFN	2
greenyellow.GO:0017060	GO:0017060	3-galactosyl-N-acetylglucosaminide 4-alpha-L-fucosyltransferase activity	2/147	3/15711	0.000259257	0.0142591	0.0102533	FUT3/FUT6	2
greenyellow.GO:0035662	GO:0035662	Toll-like receptor 4 binding	2/147	3/15711	0.000259257	0.0142591	0.0102533	S100A9/S100A8	2
greenyellow.GO:0019834	GO:0019834	phospholipase A2 inhibitor activity	2/147	4/15711	0.000515326	0.0248001	0.017833	ANXA2/ANXA1	2
greenyellow.GO:0004028	GO:0004028	3-chloroallyl aldehyde dehydrogenase activity	2/147	5/15711	0.000853599	0.029876	0.0214829	ALDH9A1/ALDH3A1	2
greenyellow.GO:0035325	GO:0035325	Toll-like receptor binding	2/147	5/15711	0.000853599	0.029876	0.0214829	S100A9/S100A8	2
greenyellow.GO:0050544	GO:0050544	arachidonic acid binding	2/147	5/15711	0.000853599	0.029876	0.0214829	S100A9/S100A8	2
greenyellow.GO:0004857	GO:0004857	enzyme inhibitor activity	10/147	331/15711	0.00111824	0.0299382	0.0215276	SLPI/CAST/HSPB1/PI3/ANXA2/ANXA1/CSTB/SERPINB1/SFN/CDKN2B	10
greenyellow.GO:0033293	GO:0033293	monocarboxylic acid binding	4/147	50/15711	0.00121302	0.0299382	0.0215276	PPARD/S100A9/FABP5/S100A8	4
greenyellow.GO:0050542	GO:0050542	icosanoid binding	2/147	6/15711	0.00127254	0.0299382	0.0215276	S100A9/S100A8	2
greenyellow.GO:0050543	GO:0050543	icosatetraenoic acid binding	2/147	6/15711	0.00127254	0.0299382	0.0215276	S100A9/S100A8	2
greenyellow.GO:1901567	GO:1901567	fatty acid derivative binding	2/147	6/15711	0.00127254	0.0299382	0.0215276	S100A9/S100A8	2
greenyellow.GO:0000977	GO:0000977	RNA polymerase II regulatory region sequence-specific DNA binding	9/147	281/15711	0.00132194	0.0299382	0.0215276	OVOL1/YBX3/FOXC1/MXD1/EHF/NFE2L2/PITX1/RARG/FOSL1	9
greenyellow.GO:0001012	GO:0001012	RNA polymerase II regulatory region DNA binding	9/147	284/15711	0.00142263	0.0304284	0.0218801	OVOL1/YBX3/FOXC1/MXD1/EHF/NFE2L2/PITX1/RARG/FOSL1	9
greenyellow.GO:0004030	GO:0004030	aldehyde dehydrogenase [NAD(P)+] activity	2/147	7/15711	0.00177062	0.0358784	0.0257991	ALDH3A2/ALDH3A1	2
greenyellow.GO:0005154	GO:0005154	epidermal growth factor receptor binding	3/147	27/15711	0.001991	0.0365016	0.0262472	TGFA/AREG/VAV2	3
greenyellow.GO:0030291	GO:0030291	protein serine/threonine kinase inhibitor activity	3/147	27/15711	0.001991	0.0365016	0.0262472	HSPB1/SFN/CDKN2B	3
greenyellow.GO:0046920	GO:0046920	alpha-(1->3)-fucosyltransferase activity	2/147	8/15711	0.00234635	0.0410612	0.0295259	FUT3/FUT6	2
greenyellow.GO:0043236	GO:0043236	laminin binding	3/147	29/15711	0.00245348	0.0410691	0.0295316	ECM1/TINAGL1/ITGA3	3
greenyellow.GO:0016620	GO:0016620	oxidoreductase activity, acting on the aldehyde or oxo group of donors, NAD or NADP as acceptor	3/147	30/15711	0.00270755	0.0434336	0.0312318	ALDH9A1/ALDH3A2/ALDH3A1	3
grey.GO:0005544	GO:0005544	calcium-dependent phospholipid binding	2/30	31/15711	0.00158358	0.0472599	0.0301498	ANXA10/ANXA13	2
grey.GO:0005008	GO:0005008	hepatocyte growth factor-activated receptor activity	43130	1/15711	0.00190949	0.0472599	0.0301498	MET	1
grey.GO:0031723	GO:0031723	CXCR4 chemokine receptor binding	43130	1/15711	0.00190949	0.0472599	0.0301498	TFF2	1
grey.GO:0061609	GO:0061609	fructose-1-phosphate aldolase activity	43130	1/15711	0.00190949	0.0472599	0.0301498	ALDOB	1
grey60	GO:0016853	isomerase activity	15/423	144/15711	7.93223e-06	0.00589365	0.00506828	PTGES2/TSTA3/PGAM1/RPUSD1/GPI/ERP29/GNPDA1/PTGES/ITPK1/FKBP4/ISYNA1/ECI1/TPI1/FKBP8/PPP2R4	15
lightcyan.GO:0031732	GO:0031732	CCR7 chemokine receptor binding	2/98	2/15711	3.85139e-05	0.0104758	0.00835144	CCL19/CCL21	2
lightcyan.GO:0031735	GO:0031735	CCR10 chemokine receptor binding	2/98	3/15711	0.000115071	0.0129201	0.0103001	CCL19/CXCL13	2
lightcyan.GO:0048020	GO:0048020	CCR chemokine receptor binding	3/98	17/15711	0.000150194	0.0129201	0.0103001	CCL19/CXCL13/CCL21	3
lightcyan.GO:0008009	GO:0008009	chemokine activity	4/98	46/15711	0.000190001	0.0129201	0.0103001	CCL19/CXCL13/CXCL14/CCL21	4
lightcyan.GO:0042379	GO:0042379	chemokine receptor binding	4/98	56/15711	0.000407748	0.0221815	0.0176834	CCL19/CXCL13/CXCL14/CCL21	4
midnightblue.GO:0046977	GO:0046977	TAP binding	7/105	7/15711	4.8615e-16	1.22996e-13	8.54601e-14	TAP2/TAP1/TAPBP/HLA-F/HLA-B/HLA-C/HLA-A	7
midnightblue.GO:0042605	GO:0042605	peptide antigen binding	7/105	31/15711	1.121e-09	1.41807e-07	9.85302e-08	HLA-E/TAP1/TAPBP/HLA-F/HLA-B/HLA-C/HLA-A	7
midnightblue.GO:0046978	GO:0046978	TAP1 binding	4/105	4/15711	1.8837e-09	1.58858e-07	1.10378e-07	TAP2/TAP1/TAPBP/HLA-F	4
midnightblue.GO:0003725	GO:0003725	double-stranded RNA binding	7/105	52/15711	5.08447e-08	3.21593e-06	2.23449e-06	IFIH1/OAS2/EIF2AK2/OAS1/OASL/OAS3/DDX60	7
midnightblue.GO:0001730	GO:0001730	2'-5'-oligoadenylate synthetase activity	3/105	3/15711	2.90089e-07	1.22321e-05	8.4991e-06	OAS2/OAS1/OAS3	3
midnightblue.GO:0046979	GO:0046979	TAP2 binding	3/105	3/15711	2.90089e-07	1.22321e-05	8.4991e-06	TAP1/TAPBP/HLA-F	3
midnightblue.GO:0048248	GO:0048248	CXCR3 chemokine receptor binding	3/105	5/15711	2.87271e-06	9.1014e-05	6.32384e-05	CXCL9/CXCL10/CXCL11	3
midnightblue.GO:0003823	GO:0003823	antigen binding	7/105	93/15711	2.87791e-06	9.1014e-05	6.32384e-05	HLA-E/TAP1/TAPBP/HLA-F/HLA-B/HLA-C/HLA-A	7
midnightblue.GO:0016763	GO:0016763	transferase activity, transferring pentosyl groups	5/105	44/15711	1.06939e-05	0.000288863	0.000200708	TYMP/PARP14/PARP9/PARP3/PARP12	5
midnightblue.GO:0003950	GO:0003950	NAD+ ADP-ribosyltransferase activity	4/105	22/15711	1.25592e-05	0.000288863	0.000200708	PARP14/PARP9/PARP3/PARP12	4
midnightblue.GO:0042287	GO:0042287	MHC protein binding	4/105	22/15711	1.25592e-05	0.000288863	0.000200708	TAP2/HLA-E/TAP1/TAPBP	4
midnightblue.GO:0015197	GO:0015197	peptide transporter activity	3/105	8/15711	1.58535e-05	0.000334244	0.000232239	TAP2/TAP1/TAPBP	3
midnightblue.GO:0045236	GO:0045236	CXCR chemokine receptor binding	3/105	10/15711	3.36421e-05	0.000637883	0.000443214	CXCL9/CXCL10/CXCL11	3
midnightblue.GO:0042379	GO:0042379	chemokine receptor binding	5/105	56/15711	3.52979e-05	0.000637883	0.000443214	CXCL9/STAT1/CXCL10/CX3CL1/CXCL11	5
midnightblue.GO:0015433	GO:0015433	peptide antigen-transporting ATPase activity	2/105	2/15711	4.42428e-05	0.000746229	0.000518495	TAP2/TAPBP	2
midnightblue.GO:0042288	GO:0042288	MHC class I protein binding	3/105	13/15711	7.90172e-05	0.00124946	0.000868149	HLA-E/TAP1/TAPBP	3
midnightblue.GO:0042277	GO:0042277	peptide binding	7/105	165/15711	0.000119144	0.00167285	0.00116233	HLA-E/TAP1/TAPBP/HLA-F/HLA-B/HLA-C/HLA-A	7
midnightblue.GO:0015440	GO:0015440	peptide-transporting ATPase activity	2/105	3/15711	0.000132148	0.00167285	0.00116233	TAP2/TAPBP	2
midnightblue.GO:0023029	GO:0023029	MHC class Ib protein binding	2/105	3/15711	0.000132148	0.00167285	0.00116233	TAP2/TAP1	2
midnightblue.GO:0005126	GO:0005126	cytokine receptor binding	8/105	225/15711	0.000132241	0.00167285	0.00116233	TNFSF10/CXCL9/STAT1/CXCL10/CX3CL1/CXCL11/JAK2/MYD88	8
midnightblue.GO:0033218	GO:0033218	amide binding	7/105	170/15711	0.000143444	0.00172816	0.00120076	HLA-E/TAP1/TAPBP/HLA-F/HLA-B/HLA-C/HLA-A	7
midnightblue.GO:0008009	GO:0008009	chemokine activity	4/105	46/15711	0.000247707	0.00284863	0.00197929	CXCL9/CXCL10/CX3CL1/CXCL11	4
midnightblue.GO:0004298	GO:0004298	threonine-type endopeptidase activity	3/105	21/15711	0.000353435	0.00372579	0.00258875	PSMB10/PSMB9/PSMB8	3
midnightblue.GO:0070003	GO:0070003	threonine-type peptidase activity	3/105	21/15711	0.000353435	0.00372579	0.00258875	PSMB10/PSMB9/PSMB8	3
midnightblue.GO:0070566	GO:0070566	adenylyltransferase activity	3/105	23/15711	0.000466077	0.0047167	0.00327726	OAS2/OAS1/OAS3	3
midnightblue.GO:0005125	GO:0005125	cytokine activity	7/105	210/15711	0.000518951	0.00504979	0.0035087	TNFSF10/CXCL9/CXCL10/CX3CL1/CXCL11/IL32/SECTM1	7
midnightblue.GO:0042887	GO:0042887	amide transmembrane transporter activity	2/105	10/15711	0.00192248	0.0180143	0.0125167	TAP2/TAPBP	2
midnightblue.GO:0032813	GO:0032813	tumor necrosis factor receptor superfamily binding	3/105	42/15711	0.00275566	0.0248994	0.0173006	TNFSF10/STAT1/MYD88	3
midnightblue.GO:0000979	GO:0000979	RNA polymerase II core promoter sequence-specific DNA binding	3/105	43/15711	0.00294807	0.0257194	0.0178703	STAT1/NLRC5/IRF7	3
midnightblue.GO:0004715	GO:0004715	non-membrane spanning protein tyrosine kinase activity	3/105	45/15711	0.00335721	0.0283125	0.0196721	JAK2/EIF2AK2/RIPK2	3
midnightblue.GO:0001664	GO:0001664	G-protein coupled receptor binding	6/105	222/15711	0.00374865	0.0305938	0.0212572	CXCL9/STAT1/CXCL10/CX3CL1/CXCL11/JAK2	6
midnightblue.GO:0005121	GO:0005121	Toll binding	1/105	1/15711	0.00668322	0.0422713	0.029371	MYD88	1
midnightblue.GO:0009032	GO:0009032	thymidine phosphorylase activity	1/105	1/15711	0.00668322	0.0422713	0.029371	TYMP	1
midnightblue.GO:0016154	GO:0016154	pyrimidine-nucleoside phosphorylase activity	1/105	1/15711	0.00668322	0.0422713	0.029371	TYMP	1
midnightblue.GO:0035400	GO:0035400	histone tyrosine kinase activity	1/105	1/15711	0.00668322	0.0422713	0.029371	JAK2	1
midnightblue.GO:0035401	GO:0035401	histone kinase activity (H3-Y41 specific)	1/105	1/15711	0.00668322	0.0422713	0.029371	JAK2	1
midnightblue.GO:0046980	GO:0046980	tapasin binding	1/105	1/15711	0.00668322	0.0422713	0.029371	TAP2	1
midnightblue.GO:0047016	GO:0047016	cholest-5-ene-3-beta,7-alpha-diol 3-beta-dehydrogenase activity	1/105	1/15711	0.00668322	0.0422713	0.029371	HSD3B7	1
midnightblue.GO:0070224	GO:0070224	sulfide:quinone oxidoreductase activity	1/105	1/15711	0.00668322	0.0422713	0.029371	SQRDL	1
midnightblue.GO:0070976	GO:0070976	TIR domain binding	1/105	1/15711	0.00668322	0.0422713	0.029371	MYD88	1
midnightblue.GO:0016874	GO:0016874	ligase activity	8/105	419/15711	0.00703004	0.0433805	0.0301416	UBE2L6/TRIM21/WARS/BIRC3/UBE2Z/DTX3L/RNF213/RNF19B	8
purple.GO:0003735	GO:0003735	structural constituent of ribosome	58/157	150/15711	6.40134e-80	2.33009e-77	2.02821e-77	RPS27L/RPS25/RPS23/RPL27/MRPS36/RPL35A/RPL6/RPL15/RPL26L1/RPL10A/RPS27/FAU/RPS9/RPL35/RPL22L1/RPL27A/RPS14/RPLP2/RPL8/RPS24/RPL24/RPL32/RPL14/RPL36A/RPL9/RPS18/RPS11/RPL23A/RPS15/RPL7/RPL3/RPS16/RPL37/RPS7/RPL11/RPL36/RPS15A/RPS19/RPLP0/RPS28/RPS4X/RPL12/RPS12/RPL37A/RPS29/RPL29/RPL18/RPS5/RPLP1/RPS17/RPL34/RPS3/RPL31/RPS6/RPL22/RPL39/RPS27A/RPL38	58
purple.GO:0019843	GO:0019843	rRNA binding	9/157	32/15711	1.81833e-11	3.30936e-09	2.88062e-09	RPS9/RPL8/RPL9/RPS18/RPS11/RPL23A/RPL37/RPL11/RPS4X	9
purple.GO:0042328	GO:0042328	heparan sulfate N-acetylglucosaminyltransferase activity	2/157	2/15711	9.92303e-05	0.00902996	0.00786008	EXT2/EXT1	2
purple.GO:0050509	GO:0050509	N-acetylglucosaminyl-proteoglycan 4-beta-glucuronosyltransferase activity	2/157	2/15711	9.92303e-05	0.00902996	0.00786008	EXT2/EXT1	2
purple.GO:0050508	GO:0050508	glucuronosyl-N-acetylglucosaminyl-proteoglycan 4-alpha-N-acetylglucosaminyltransferase activity	2/157	3/15711	0.000295733	0.0190095	0.0165467	EXT2/EXT1	2
purple.GO:0045182	GO:0045182	translation regulator activity	4/157	33/15711	0.000313344	0.0190095	0.0165467	RPS27L/EEF2/RPS9/RPS14	4
tan.GO:0032395	GO:0032395	MHC class II receptor activity	7/133	12/15711	2.03154e-12	8.83721e-10	6.07324e-10	HLA-DPA1/HLA-DOA/HLA-DQA1/HLA-DRA/HLA-DQB1/HLA-DRB1/HLA-DQB2	7
tan.GO:0003823	GO:0003823	antigen binding	12/133	93/15711	1.9053e-11	4.14402e-09	2.84792e-09	HLA-DPB1/HLA-DPA1/HLA-DMB/HLA-DOA/HLA-DQA1/HLA-DRA/CD74/HLA-DQB1/HLA-DRB1/HLA-DMA/HLA-DQB2/CD40	12
tan.GO:0023023	GO:0023023	MHC protein complex binding	6/133	16/15711	2.45449e-09	2.66925e-07	1.83441e-07	HLA-DMB/HLA-DOA/HLA-DRA/CD74/HLA-DRB1/HLA-DMA	6
tan.GO:0023026	GO:0023026	MHC class II protein complex binding	6/133	16/15711	2.45449e-09	2.66925e-07	1.83441e-07	HLA-DMB/HLA-DOA/HLA-DRA/CD74/HLA-DRB1/HLA-DMA	6
tan.GO:0042605	GO:0042605	peptide antigen binding	7/133	31/15711	5.90062e-09	5.13354e-07	3.52795e-07	HLA-DPB1/HLA-DPA1/HLA-DQA1/HLA-DRA/HLA-DQB1/HLA-DRB1/HLA-DQB2	7
tan.GO:0042277	GO:0042277	peptide binding	11/133	165/15711	1.53478e-07	1.11271e-05	7.64697e-06	HLA-DPB1/HLA-DPA1/HLA-DQA1/HLA-DRA/CD74/HLA-DQB1/HLA-DRB1/TPP1/HLA-DQB2/APOE/GPX1	11
tan.GO:0033218	GO:0033218	amide binding	11/133	170/15711	2.07765e-07	1.29111e-05	8.87297e-06	HLA-DPB1/HLA-DPA1/HLA-DQA1/HLA-DRA/CD74/HLA-DQB1/HLA-DRB1/TPP1/HLA-DQB2/APOE/GPX1	11
tan.GO:0004175	GO:0004175	endopeptidase activity	12/133	379/15711	9.08572e-05	0.00494036	0.00339519	CTSC/GZMA/CTSL/TPP1/ADAMDEC1/GZMB/LGMN/CTSS/ATP6AP2/CTSD/CFI/MMP9	12
tan.GO:0016298	GO:0016298	lipase activity	6/133	102/15711	0.000227617	0.0108965	0.00748844	CCL5/C3AR1/PLA2G7/LIPA/PLD3/HMOX1	6
tan.GO:0015929	GO:0015929	hexosaminidase activity	3/133	15/15711	0.000250494	0.0108965	0.00748844	GM2A/HEXB/NAGA	3
tan.GO:0004563	GO:0004563	beta-N-acetylhexosaminidase activity	2/133	4/15711	0.000422042	0.015299	0.010514	GM2A/HEXB	2
tan.GO:0042289	GO:0042289	MHC class II protein binding	2/133	4/15711	0.000422042	0.015299	0.010514	CD4/CD74	2
tan.GO:0001948	GO:0001948	glycoprotein binding	5/133	80/15711	0.000583017	0.0185047	0.0127171	CD4/CTSL/CTSS/SERPINA1/SDCBP	5
tan.GO:0008236	GO:0008236	serine-type peptidase activity	7/133	172/15711	0.000652852	0.0185047	0.0127171	CTSC/GZMA/TPP1/GZMB/CPVL/SCPEP1/CFI	7
tan.GO:0004185	GO:0004185	serine-type carboxypeptidase activity	2/133	5/15711	0.000699498	0.0185047	0.0127171	CPVL/SCPEP1	2
tan.GO:0060228	GO:0060228	phosphatidylcholine-sterol O-acyltransferase activator activity	2/133	5/15711	0.000699498	0.0185047	0.0127171	APOE/APOC1	2
tan.GO:0017171	GO:0017171	serine hydrolase activity	7/133	175/15711	0.000723174	0.0185047	0.0127171	CTSC/GZMA/TPP1/GZMB/CPVL/SCPEP1/CFI	7
tan.GO:0050699	GO:0050699	WW domain binding	3/133	22/15711	0.000811863	0.01962	0.0134836	LITAF/NDFIP1/SCNN1A	3
tan.GO:0004620	GO:0004620	phospholipase activity	5/133	88/15711	0.000900272	0.0206115	0.014165	CCL5/C3AR1/PLA2G7/PLD3/HMOX1	5
tan.GO:0004630	GO:0004630	phospholipase D activity	2/133	6/15711	0.00104343	0.0206314	0.0141786	PLD3/HMOX1	2
tan.GO:0031726	GO:0031726	CCR1 chemokine receptor binding	2/133	6/15711	0.00104343	0.0206314	0.0141786	CCL5/CCL4	2
tan.GO:0031730	GO:0031730	CCR5 chemokine receptor binding	2/133	6/15711	0.00104343	0.0206314	0.0141786	CCL5/CCL4	2
tan.GO:0005518	GO:0005518	collagen binding	4/133	62/15711	0.00187308	0.0354256	0.0243457	SRGN/CTSL/CTSS/MMP9	4
tan.GO:0016004	GO:0016004	phospholipase activator activity	2/133	9/15711	0.00246282	0.0446387	0.0306773	CCL5/GM2A	2
turquoise.GO:0003779	GO:0003779	actin binding	68/961	376/15711	3.99652e-16	5.12354e-13	4.77058e-13	MYO10/PARVA/CGN/CORO1C/KLHL5/GSN/UTRN/CNN3/MYO7B/PALLD/FLNA/TNS1/INF2/MYO5B/SVIL/CALD1/LMOD1/MYLK/SORBS1/NEXN/TAGLN/VCL/ABL1/MYH11/ADD1/SYNPO2/TPM1/FLNC/SHROOM3/CNN1/MLPH/TLN1/SMTN/MYO6/RDX/MISP/VILL/TPM2/DSTN/ACTN1/WASF2/MYH14/ITGB1/MICAL2/MYO1A/CORO2A/POF1B/PDLIM5/AFAP1/ANG/PLS1/EPS8L2/FHL3/ARPC5/EZR/DIAPH1/MYO5C/CAPZA1/ADD3/IQGAP2/ENAH/CORO1B/MARCKSL1/MYO1C/HIP1R/LIMA1/TPM3/SNTA1	68
turquoise.GO:0005516	GO:0005516	calmodulin binding	29/961	168/15711	3.47993e-07	0.000223063	0.000207697	MYO10/RGS2/CNN3/MYO5B/CALD1/GEM/MYLK/ATP2B4/MYH11/ADD1/CNN1/KCNN4/MYO6/KCNQ1/CASK/MYH14/SLC9A1/WFS1/TRPM4/MYO1A/PLCB3/ITPKA/MYO5C/ADD3/IQGAP2/MARCKSL1/MYO1C/ATP2B1/SNTA1	29
turquoise.GO:0016614	GO:0016614	oxidoreductase activity, acting on CH-OH group of donors	21/961	129/15711	3.51086e-05	0.0118609	0.0110438	NSDHL/IDH1/AKR7A3/DHCR24/ADH5/CHDH/C1orf43/LDHD/HSD11B2/HSD17B11/SPR/AKR1C3/G6PD/AKR1A1/CRYL1/HSD17B4/BMP2/PTGR1/MDH2/GPD2/UGDH	21
turquoise.GO:0051015	GO:0051015	actin filament binding	17/961	92/15711	3.70074e-05	0.0118609	0.0110438	MYO10/CORO1C/FLNA/SVIL/NEXN/MYH11/ADD1/FLNC/MYO6/ACTN1/MYH14/CORO2A/PLS1/ARPC5/EZR/CORO1B/LIMA1	17
turquoise.GO:0048037	GO:0048037	cofactor binding	33/961	258/15711	4.67267e-05	0.0119807	0.0111554	GALE/AOC3/SQLE/AOC1/IDH1/DHCR24/CHDH/PDXDC1/SDHA/CYB5R3/MICAL2/C1orf43/AIFM1/GOT1/LDHD/ACBD3/ACBD5/NDUFS2/ACADVL/PNPO/HSD11B2/SUCLG1/SPR/G6PD/PDXK/CRYL1/DDC/MAOB/TXNRD1/GSR/GMDS/SPTLC2/UGDH	33
turquoise.GO:0016616	GO:0016616	oxidoreductase activity, acting on the CH-OH group of donors, NAD or NADP as acceptor	19/961	114/15711	5.87098e-05	0.0125443	0.0116802	NSDHL/IDH1/AKR7A3/DHCR24/ADH5/C1orf43/LDHD/HSD11B2/HSD17B11/SPR/AKR1C3/G6PD/AKR1A1/CRYL1/HSD17B4/BMP2/PTGR1/MDH2/UGDH	19
turquoise.GO:0005388	GO:0005388	calcium-transporting ATPase activity	5/961	9/15711	8.67952e-05	0.0158959	0.0148009	ATP2B4/ATP2C2/ATP2C1/ATP2A2/ATP2B1	5
turquoise.GO:0019003	GO:0019003	GDP binding	11/961	48/15711	0.000118036	0.017306	0.0161138	RAB12/GEM/RAP2B/RHOB/RRAS/SUCLG1/SRP54/RAB2A/RAB7A/SUCLG2/RAB27B	11
turquoise.GO:0050662	GO:0050662	coenzyme binding	25/961	182/15711	0.000121493	0.017306	0.0161138	GALE/SQLE/IDH1/DHCR24/CHDH/SDHA/CYB5R3/MICAL2/C1orf43/AIFM1/LDHD/ACBD3/ACBD5/NDUFS2/ACADVL/PNPO/HSD11B2/SPR/G6PD/CRYL1/MAOB/TXNRD1/GSR/GMDS/UGDH	25
turquoise.GO:0003756	GO:0003756	protein disulfide isomerase activity	7/961	21/15711	0.000170626	0.0198857	0.0185158	PDIA4/QSOX1/P4HB/TMX4/PDIA3/ERP44/TXNDC11	7
turquoise.GO:0016864	GO:0016864	intramolecular oxidoreductase activity, transposing S-S bonds	7/961	21/15711	0.000170626	0.0198857	0.0185158	PDIA4/QSOX1/P4HB/TMX4/PDIA3/ERP44/TXNDC11	7
turquoise.GO:0001948	GO:0001948	glycoprotein binding	14/961	80/15711	0.000318925	0.0327891	0.0305303	FLNA/VCL/CDH1/HSPA5/LGALS1/ITGB1/LDLR/AGR2/CALR/NID1/GPC4/ERLEC1/OS9/SDC1	14
turquoise.GO:0015662	GO:0015662	ATPase activity, coupled to transmembrane movement of ions, phosphorylative mechanism	8/961	30/15711	0.000332495	0.0327891	0.0305303	ATP2B4/ATP1A1/ATP1B1/ATP2C2/ATP2C1/ATP2A2/ATP2B1/ATP1B3	8
turquoise.GO:0050839	GO:0050839	cell adhesion molecule binding	22/961	165/15711	0.000462076	0.042313	0.0393981	UTRN/VCL/CDH1/PROM1/TLN1/ACTN1/CTNNAL1/ITGA6/ITGB1/ITGA5/CXADR/ADAM15/NPTN/CALR/CD2AP/ADAM9/LAMB2/EZR/CD151/ITGA2/LYN/PVRL3	22
yellow.GO:0015078	GO:0015078	hydrogen ion transmembrane transporter activity	23/283	94/15711	4.85745e-20	2.58416e-17	2.09126e-17	ATP6V1E1/COA6/COX5B/ATP6V0E1/COX5A/ATP5L/ATP5J/ATP5G3/COX7C/ATP5G1/UQCR10/NDUFA4/ATP5C1/UQCRQ/COX8A/ATP5I/ATP5H/COX7B/COX4I1/COX7A2/ATP5O/ATP5F1/COX6A1	23
yellow.GO:0003954	GO:0003954	NADH dehydrogenase activity	14/283	39/15711	2.76851e-15	3.68212e-13	2.97979e-13	NDUFB5/NDUFS6/NDUFA1/NDUFA12/NDUFB8/NDUFC1/NDUFA4/NDUFB1/NDUFS3/NDUFB4/NDUFB2/NDUFAB1/NDUFA13/NDUFB3	14
yellow.GO:0008137	GO:0008137	NADH dehydrogenase (ubiquinone) activity	14/283	39/15711	2.76851e-15	3.68212e-13	2.97979e-13	NDUFB5/NDUFS6/NDUFA1/NDUFA12/NDUFB8/NDUFC1/NDUFA4/NDUFB1/NDUFS3/NDUFB4/NDUFB2/NDUFAB1/NDUFA13/NDUFB3	14
yellow.GO:0050136	GO:0050136	NADH dehydrogenase (quinone) activity	14/283	39/15711	2.76851e-15	3.68212e-13	2.97979e-13	NDUFB5/NDUFS6/NDUFA1/NDUFA12/NDUFB8/NDUFC1/NDUFA4/NDUFB1/NDUFS3/NDUFB4/NDUFB2/NDUFAB1/NDUFA13/NDUFB3	14
yellow.GO:0009055	GO:0009055	electron carrier activity	18/283	99/15711	1.57673e-13	1.67764e-11	1.35765e-11	COA6/COX5B/COX5A/NDUFS6/COX7C/ETFB/NDUFA12/SDHD/FDX1/NDUFA4/NDUFS3/COX8A/COX7B/TXNDC17/COX4I1/COX7A2/COX6A1/SDHB	18
yellow.GO:0016655	GO:0016655	oxidoreductase activity, acting on NAD(P)H, quinone or similar compound as acceptor	14/283	53/15711	3.52094e-13	3.1219e-11	2.52643e-11	NDUFB5/NDUFS6/NDUFA1/NDUFA12/NDUFB8/NDUFC1/NDUFA4/NDUFB1/NDUFS3/NDUFB4/NDUFB2/NDUFAB1/NDUFA13/NDUFB3	14
yellow.GO:0004129	GO:0004129	cytochrome-c oxidase activity	10/283	25/15711	7.90446e-12	4.67241e-10	3.7812e-10	COA6/COX5B/COX5A/COX7C/NDUFA4/COX8A/COX7B/COX4I1/COX7A2/COX6A1	10
yellow.GO:0015002	GO:0015002	heme-copper terminal oxidase activity	10/283	25/15711	7.90446e-12	4.67241e-10	3.7812e-10	COA6/COX5B/COX5A/COX7C/NDUFA4/COX8A/COX7B/COX4I1/COX7A2/COX6A1	10
yellow.GO:0016676	GO:0016676	oxidoreductase activity, acting on a heme group of donors, oxygen as acceptor	10/283	25/15711	7.90446e-12	4.67241e-10	3.7812e-10	COA6/COX5B/COX5A/COX7C/NDUFA4/COX8A/COX7B/COX4I1/COX7A2/COX6A1	10
yellow.GO:0016675	GO:0016675	oxidoreductase activity, acting on a heme group of donors	10/283	26/15711	1.26419e-11	6.72552e-10	5.44269e-10	COA6/COX5B/COX5A/COX7C/NDUFA4/COX8A/COX7B/COX4I1/COX7A2/COX6A1	10
yellow.GO:0016651	GO:0016651	oxidoreductase activity, acting on NAD(P)H	15/283	94/15711	1.22303e-10	5.91503e-09	4.7868e-09	NDUFB5/NDUFS6/NDUFA1/NDUFA12/NDUFB8/NDUFC1/NDUFA4/NDUFB1/NDUFS3/NDUFB4/NDUFB2/NDUFAB1/TXNDC17/NDUFA13/NDUFB3	15
yellow.GO:0015077	GO:0015077	monovalent inorganic cation transmembrane transporter activity	23/283	329/15711	3.09402e-08	1.37168e-06	1.11005e-06	ATP6V1E1/COA6/COX5B/ATP6V0E1/COX5A/ATP5L/ATP5J/ATP5G3/COX7C/ATP5G1/UQCR10/NDUFA4/ATP5C1/UQCRQ/COX8A/ATP5I/ATP5H/COX7B/COX4I1/COX7A2/ATP5O/ATP5F1/COX6A1	23
yellow.GO:0003735	GO:0003735	structural constituent of ribosome	14/283	150/15711	5.50586e-07	2.25317e-05	1.8234e-05	MRPL33/MRPL36/MRPL57/MRPL52/MRPL18/MRPL51/MRPL47/MRPL27/MRPL21/MRPL20/RPL36AL/MRPL16/MRPS15/MRPS21	14
yellow.GO:0044769	GO:0044769	ATPase activity, coupled to transmembrane movement of ions, rotational mechanism	5/283	19/15711	1.73037e-05	0.000657542	0.000532122	ATP6V1E1/ATP6V0E1/ATP5C1/ATP5O/ATP5F1	5
yellow.GO:0022890	GO:0022890	inorganic cation transmembrane transporter activity	23/283	479/15711	1.99106e-05	0.000706162	0.000571469	ATP6V1E1/COA6/COX5B/ATP6V0E1/COX5A/ATP5L/ATP5J/ATP5G3/COX7C/ATP5G1/UQCR10/NDUFA4/ATP5C1/UQCRQ/COX8A/ATP5I/ATP5H/COX7B/COX4I1/COX7A2/ATP5O/ATP5F1/COX6A1	23
yellow.GO:0016209	GO:0016209	antioxidant activity	7/283	67/15711	0.000197318	0.00656083	0.00530942	CAT/MGST3/PARK7/GSTO1/SOD1/MGST2/TXNDC17	7
yellow.GO:0019843	GO:0019843	rRNA binding	5/283	32/15711	0.0002474	0.00774216	0.00626542	RPF1/MRPL18/MRPL20/IMP3/MRPL16	5
yellow.GO:0004298	GO:0004298	threonine-type endopeptidase activity	4/283	21/15711	0.000484309	0.0135607	0.0109741	PSMB3/PSMB1/PSMB5/PSMA3	4
yellow.GO:0070003	GO:0070003	threonine-type peptidase activity	4/283	21/15711	0.000484309	0.0135607	0.0109741	PSMB3/PSMB1/PSMB5/PSMA3	4
yellow.GO:0004364	GO:0004364	glutathione transferase activity	4/283	23/15711	0.00069653	0.0173824	0.0140668	MGST3/GSTO1/GSTM3/MGST2	4
yellow.GO:0004601	GO:0004601	peroxidase activity	5/283	40/15711	0.000718819	0.0173824	0.0140668	CAT/MGST3/PARK7/MGST2/TXNDC17	5
yellow.GO:0016684	GO:0016684	oxidoreductase activity, acting on peroxide as acceptor	5/283	40/15711	0.000718819	0.0173824	0.0140668	CAT/MGST3/PARK7/MGST2/TXNDC17	5
yellow.GO:0015399	GO:0015399	primary active transmembrane transporter activity	8/283	109/15711	0.000792733	0.0175723	0.0142205	ATP6V1E1/ATP6V0E1/ABCA2/ATP5C1/SEC61G/ABCC1/ATP5O/ATP5F1	8
yellow.GO:0015405	GO:0015405	P-P-bond-hydrolysis-driven transmembrane transporter activity	8/283	109/15711	0.000792733	0.0175723	0.0142205	ATP6V1E1/ATP6V0E1/ABCA2/ATP5C1/SEC61G/ABCC1/ATP5O/ATP5F1	8
yellow.GO:0046933	GO:0046933	proton-transporting ATP synthase activity, rotational mechanism	3/283	11/15711	0.000857189	0.018241	0.0147617	ATP5C1/ATP5O/ATP5F1	3
yellow.GO:0048408	GO:0048408	epidermal growth factor binding	2/283	3/15711	0.000958444	0.0188849	0.0152828	SEC61B/EGFR	2
yellow.GO:0050833	GO:0050833	pyruvate transmembrane transporter activity	2/283	3/15711	0.000958444	0.0188849	0.0152828	MPC2/MPC1	2
yellow.GO:0000104	GO:0000104	succinate dehydrogenase activity	2/283	4/15711	0.00189406	0.0325045	0.0263046	SDHD/SDHB	2
yellow.GO:0016531	GO:0016531	copper chaperone activity	2/283	4/15711	0.00189406	0.0325045	0.0263046	PARK7/COX17	2
yellow.GO:0019788	GO:0019788	NEDD8 ligase activity	2/283	4/15711	0.00189406	0.0325045	0.0263046	RBX1/RNF7	2
yellow.GO:0048039	GO:0048039	ubiquinone binding	2/283	4/15711	0.00189406	0.0325045	0.0263046	SDHD/SDHB	2
yellow.GO:0016765	GO:0016765	transferase activity, transferring alkyl or aryl (other than methyl) groups	5/283	51/15711	0.00218495	0.0363248	0.0293962	MGST3/GSTO1/GSTM3/MGST2/SRM	5
yellow.GO:0005507	GO:0005507	copper ion binding	5/283	52/15711	0.0023824	0.0384072	0.0310814	PARK7/RNF7/S100A13/SOD1/COX17	5
yellow.GO:0042626	GO:0042626	ATPase activity, coupled to transmembrane movement of substances	7/283	102/15711	0.00245871	0.0384716	0.0311336	ATP6V1E1/ATP6V0E1/ABCA2/ATP5C1/ABCC1/ATP5O/ATP5F1	7
yellow.GO:0043492	GO:0043492	ATPase activity, coupled to movement of substances	7/283	103/15711	0.00259831	0.0394943	0.0319612	ATP6V1E1/ATP6V0E1/ABCA2/ATP5C1/ABCC1/ATP5O/ATP5F1	7
yellow.GO:0016820	GO:0016820	hydrolase activity, acting on acid anhydrides, catalyzing transmembrane movement of substances	7/283	105/15711	0.00289571	0.0427922	0.03463	ATP6V1E1/ATP6V0E1/ABCA2/ATP5C1/ABCC1/ATP5O/ATP5F1	7
yellow.GO:0004046	GO:0004046	aminoacylase activity	2/283	5/15711	0.00311923	0.0436693	0.0353398	CAT/DARS	2
yellow.GO:0016530	GO:0016530	metallochaperone activity	2/283	5/15711	0.00311923	0.0436693	0.0353398	PARK7/COX17	2
yellow.GO:0046961	GO:0046961	proton-transporting ATPase activity, rotational mechanism	3/283	17/15711	0.00326101	0.0444835	0.0359987	ATP6V1E1/ATP6V0E1/ATP5C1	3
