# Supplementary material for: Candidate genes in gastric cancer identified by constructing a weighted gene co-expression network
Source: PeerJ. 2018 May 4;6:e4692. doi: 10.7717/peerj.4692 (PMC5937478; doi:10.7717/peerj.4692)
Supplement: Table S6 [file peerj-06-4692-s007.xlsx]

## Sheet: BP
Module	ID	Description	GeneRatio	BgRatio	pvalue	p.adjust	qvalue	geneID	Count
blue.GO:0000375	GO:0000375	RNA splicing, via transesterification reactions	55/654	229/16119	1.83489e-27	5.59213e-24	4.75735e-24	PAPOLA/SNRNP200/THRAP3/SRPK1/SF3B3/CSTF2/PPIL1/PABPC1/USP39/PTBP1/SRSF1/DHX9/HNRNPK/RBM22/EFTUD2/SFPQ/ACIN1/HNRNPA1/NUDT21/PRPF8/HNRNPA2B1/PRMT5/HNRNPC/SMC1A/SNW1/RBM17/C1QBP/STRAP/FUS/SRSF3/HNRNPF/POLR2C/HNRNPL/CPSF7/SRSF7/SYNCRIP/HNRNPR/CPSF3/PRPF19/SF3B2/NCBP1/POLR2B/DDX1/KHSRP/POLR2A/SF3A1/HNRNPM/SF3A3/HNRNPA3/HNRNPD/HNRNPU/POLR2K/SF1/DDX23/TGS1	55
blue.GO:0000377	GO:0000377	RNA splicing, via transesterification reactions with bulged adenosine as nucleophile	54/654	224/16119	4.57746e-27	5.59213e-24	4.75735e-24	PAPOLA/SNRNP200/THRAP3/SRPK1/SF3B3/CSTF2/PPIL1/PABPC1/USP39/PTBP1/SRSF1/DHX9/HNRNPK/RBM22/EFTUD2/SFPQ/ACIN1/HNRNPA1/NUDT21/PRPF8/HNRNPA2B1/PRMT5/HNRNPC/SMC1A/SNW1/RBM17/C1QBP/STRAP/FUS/SRSF3/HNRNPF/POLR2C/HNRNPL/CPSF7/SRSF7/SYNCRIP/HNRNPR/CPSF3/PRPF19/SF3B2/NCBP1/POLR2B/DDX1/POLR2A/SF3A1/HNRNPM/SF3A3/HNRNPA3/HNRNPD/HNRNPU/POLR2K/SF1/DDX23/TGS1	54
blue.GO:0000398	GO:0000398	mRNA splicing, via spliceosome	54/654	224/16119	4.57746e-27	5.59213e-24	4.75735e-24	PAPOLA/SNRNP200/THRAP3/SRPK1/SF3B3/CSTF2/PPIL1/PABPC1/USP39/PTBP1/SRSF1/DHX9/HNRNPK/RBM22/EFTUD2/SFPQ/ACIN1/HNRNPA1/NUDT21/PRPF8/HNRNPA2B1/PRMT5/HNRNPC/SMC1A/SNW1/RBM17/C1QBP/STRAP/FUS/SRSF3/HNRNPF/POLR2C/HNRNPL/CPSF7/SRSF7/SYNCRIP/HNRNPR/CPSF3/PRPF19/SF3B2/NCBP1/POLR2B/DDX1/POLR2A/SF3A1/HNRNPM/SF3A3/HNRNPA3/HNRNPD/HNRNPU/POLR2K/SF1/DDX23/TGS1	54
blue.GO:0007059	GO:0007059	chromosome segregation	45/654	169/16119	1.14843e-24	1.05225e-21	8.95168e-22	CDCA8/SPAG5/NCAPH/BUB1/CIAO1/KIF2C/DLGAP5/CENPF/HJURP/RAD21/SKA3/SRPK1/KIF18B/CHAMP1/PLK1/INCENP/NEK2/BIRC5/RACGAP1/STAG2/MAD2L1/SKA2/SMC2/NUSAP1/NCAPD2/MIS18A/CDCA5/KIF11/KIFC1/RCC1/RCC2/SMC3/NAA50/ZWINT/SMC1A/RB1/BUB3/ACTR2/CCNB1/PTTG1/CTCF/PDS5A/MCMBP/ECT2/SMC4	45
blue.GO:0008380	GO:0008380	RNA splicing	63/654	346/16119	3.25563e-24	2.38638e-21	2.03014e-21	PAPOLA/SNRNP200/THRAP3/SRPK1/SF3B3/CSTF2/NONO/PPIL1/PABPC1/USP39/PTBP1/SRSF1/DHX9/PTBP3/HNRNPK/RBM22/EFTUD2/SFPQ/ACIN1/HNRNPA1/NUDT21/PRPF8/HNRNPA2B1/PRMT5/RTCB/PRPF40A/DHX15/HNRNPC/SMC1A/SNW1/RBM17/C1QBP/STRAP/FUS/SRSF3/HNRNPF/POLR2C/HNRNPL/CPSF7/SRSF7/SYNCRIP/WBP11/HNRNPR/CCAR2/CPSF3/PRPF19/SF3B2/NCBP1/POLR2B/DDX1/KHSRP/POLR2A/SF3A1/HNRNPM/TSEN15/SF3A3/HNRNPA3/HNRNPD/HNRNPU/POLR2K/SF1/DDX23/TGS1	63
blue.GO:0006397	GO:0006397	mRNA processing	68/654	427/16119	1.29106e-22	7.88623e-20	6.70898e-20	PAPOLA/SNRNP200/THRAP3/SRPK1/SF3B3/CSTF2/GRSF1/NONO/PPIL1/PABPC1/USP39/PTBP1/SRSF1/DHX9/PTBP3/HNRNPK/RBM22/EFTUD2/SFPQ/ACIN1/HNRNPA1/NUDT21/PRPF8/HNRNPA2B1/PRMT5/KHDRBS1/PRPF40A/DHX15/HNRNPC/SMC1A/SNW1/RBM17/C1QBP/SLBP/CNOT1/STRAP/EIF4G1/FUS/SRSF3/HNRNPF/POLR2C/HNRNPL/CPSF7/SRSF7/SYNCRIP/WBP11/HNRNPR/CCAR2/CCNB1/CPSF3/PRPF19/SF3B2/NCBP1/POLR2B/DDX1/KHSRP/POLR2A/SF3A1/HNRNPM/TSEN15/SF3A3/HNRNPA3/H…	68
blue.GO:0007067	GO:0007067	mitotic nuclear division	57/654	366/16119	1.26018e-18	6.59794e-16	5.61301e-16	CDC16/CDCA8/SPAG5/NCAPH/BUB1/ANLN/KIF2C/DLGAP5/CENPF/RAD21/SKA3/KIF18B/CHAMP1/PLK1/CDC20/INCENP/NSUN2/NEK2/BIRC5/CCNB2/RACGAP1/BUB1B/STAG2/TIMELESS/MAD2L1/SKA2/SMC2/CCNA2/CEP55/RAN/CKAP5/NUSAP1/NCAPD2/MIS18A/CDCA5/KIF11/PRMT5/KIFC1/RCC1/RCC2/SMC3/NAA50/ZWINT/SMC1A/RB1/ASUN/BUB3/CDK1/PBK/CCNB1/PTTG1/PDS5A/MCMBP/EPS8/SMC4/CDK2/NOLC1	57
blue.GO:0000070	GO:0000070	mitotic sister chromatid segregation	23/654	60/16119	3.80285e-17	1.74218e-14	1.48211e-14	CDCA8/SPAG5/NCAPH/DLGAP5/KIF18B/CHAMP1/PLK1/NEK2/MAD2L1/SMC2/NUSAP1/NCAPD2/CDCA5/KIFC1/SMC3/NAA50/ZWINT/SMC1A/RB1/BUB3/CCNB1/PDS5A/SMC4	23
blue.GO:0000819	GO:0000819	sister chromatid segregation	23/654	68/16119	9.60162e-16	3.90999e-13	3.32631e-13	CDCA8/SPAG5/NCAPH/DLGAP5/KIF18B/CHAMP1/PLK1/NEK2/MAD2L1/SMC2/NUSAP1/NCAPD2/CDCA5/KIFC1/SMC3/NAA50/ZWINT/SMC1A/RB1/BUB3/CCNB1/PDS5A/SMC4	23
blue.GO:0022613	GO:0022613	ribonucleoprotein complex biogenesis	45/654	284/16119	3.21457e-15	1.17814e-12	1.00227e-12	NOL6/SNRNP200/GNL3/NOL11/TFB2M/MTIF2/XPO1/DENR/PATL1/NPM1/USP39/LSM14A/SRSF1/RAN/EIF3A/GTPBP4/EIF3L/PRMT5/PA2G4/NOP14/PES1/C1QBP/RRN3/EIF3H/LSG1/CNOT1/STRAP/NIP7/RRP1B/WBP11/PRPF19/NCBP1/DDX1/EIF3D/CIRH1A/SF3A1/SF3A3/UTP18/NOLC1/SF1/EXOSC10/GAR1/DDX23/EIF3E/TGS1	45
blue.GO:0071103	GO:0071103	DNA conformation change	37/654	201/16119	7.90933e-15	2.43894e-12	2.07486e-12	NCAPH/HJURP/SRPK1/XRCC5/MCM3/PSME4/NAP1L4/NPM1/SMC2/DHX9/NUSAP1/NCAPD2/ACIN1/MIS18A/CDCA5/CENPU/HMGB1/CHD1L/ANP32B/MCM4/NBN/RBBP7/MCM5/MCM6/CDK1/MCM2/CCNB1/HMGB2/SMARCA5/CTCF/DDX1/RBBP4/SMC4/NASP/BRD2/XRCC6/G3BP1	37
blue.GO:0006281	GO:0006281	DNA repair	55/654	416/16119	7.98561e-15	2.43894e-12	2.07486e-12	CUL4A/TRIP13/UBE2N/FANCI/RAD21/XRCC5/UBE2T/USP7/UBE2D3/RFC3/FEN1/TOPBP1/PRKDC/PSME4/NONO/DDB1/NPM1/CEBPG/SUPT16H/BAZ1B/WRNIP1/SFPQ/BCCIP/CDCA5/DEK/HMGB1/CHD1L/RPA2/RAD51AP1/HMGN1/NBN/SMC3/RBM14/TDP2/SMC1A/USP1/RPA1/CDK1/POLR2C/USP10/HMGB2/SSRP1/PRPF19/SMARCA5/PTTG1/POLR2B/DDX1/POLR2A/TCEA1/YY1/XRCC6/CDK2/UNG/KIAA0101/POLR2K	55
blue.GO:0044770	GO:0044770	cell cycle phase transition	59/654	476/16119	1.50514e-14	4.24333e-12	3.60989e-12	CUL4A/IQGAP3/CDC16/CDKN3/BUB1/MYB/TRIAP1/CDKN1B/DLGAP5/MELK/CENPF/PLK1/TCF3/CDC20/MCM3/NEK2/BIRC5/CCNB2/BUB1B/PRKDC/PSME4/TIMELESS/DDB1/MAD2L1/EZH2/CCNA2/CHMP4C/CKAP5/RRM2/CDCA5/TYMS/RPA2/MCM4/YWHAE/KHDRBS1/RCC1/PSMD5/NBN/RCC2/ZWINT/SMC1A/YWHAG/TFDP1/RB1/CUL1/PPP6C/MCM5/MCM6/RPA1/BUB3/CDK1/MCM2/CCNB1/RBBP4/CDT1/CDK2/PSMD7/SKP2/GSPT1	59
blue.GO:0044772	GO:0044772	mitotic cell cycle phase transition	58/654	465/16119	1.93249e-14	5.05898e-12	4.30378e-12	CUL4A/IQGAP3/CDC16/CDKN3/BUB1/MYB/TRIAP1/CDKN1B/DLGAP5/MELK/CENPF/PLK1/TCF3/CDC20/MCM3/NEK2/BIRC5/CCNB2/BUB1B/PRKDC/PSME4/DDB1/MAD2L1/EZH2/CCNA2/CHMP4C/CKAP5/RRM2/CDCA5/TYMS/RPA2/MCM4/YWHAE/KHDRBS1/RCC1/PSMD5/NBN/RCC2/ZWINT/SMC1A/YWHAG/TFDP1/RB1/CUL1/PPP6C/MCM5/MCM6/RPA1/BUB3/CDK1/MCM2/CCNB1/RBBP4/CDT1/CDK2/PSMD7/SKP2/GSPT1	58
blue.GO:0010608	GO:0010608	posttranscriptional regulation of gene expression	53/654	449/16119	2.46328e-12	6.0186e-10	5.12016e-10	GOLGA7/THRAP3/LRPPRC/PLK1/EPRS/SRRT/IARS2/TCF3/MTIF2/ETF1/PRKDC/METAP1/NPM1/PABPC1/LSM14A/SRSF1/DHX9/CAPRIN1/YTHDF2/LARS/EIF3A/HRSP12/GTPBP4/EIF3L/PA2G4/KHDRBS1/UHMK1/LARP1/HSPD1/HNRNPC/GUF1/IARS/ILF3/C1QBP/POLDIP3/EIF3H/GCN1L1/CNOT1/EIF4G1/MTPN/SYNCRIP/CCAR2/NCBP1/PPP1R15B/VHL/DDX1/EIF2S1/EIF3D/HNRNPD/AARS/HNRNPU/EIF3E/SERBP1	53
blue.GO:0006417	GO:0006417	regulation of translation	38/654	262/16119	7.84111e-12	1.7961e-09	1.52798e-09	LRPPRC/EPRS/IARS2/MTIF2/ETF1/METAP1/NPM1/PABPC1/LSM14A/SRSF1/CAPRIN1/LARS/EIF3A/HRSP12/EIF3L/PA2G4/KHDRBS1/UHMK1/LARP1/GUF1/IARS/ILF3/C1QBP/POLDIP3/EIF3H/GCN1L1/CNOT1/EIF4G1/MTPN/SYNCRIP/NCBP1/PPP1R15B/DDX1/EIF2S1/EIF3D/HNRNPD/AARS/EIF3E	38
blue.GO:0022618	GO:0022618	ribonucleoprotein complex assembly	26/654	136/16119	3.39895e-11	7.32773e-09	6.23386e-09	SNRNP200/MTIF2/DENR/PATL1/NPM1/USP39/LSM14A/SRSF1/EIF3A/EIF3L/PRMT5/C1QBP/EIF3H/CNOT1/STRAP/NIP7/PRPF19/NCBP1/DDX1/EIF3D/SF3A1/SF3A3/SF1/DDX23/EIF3E/TGS1	26
blue.GO:0071826	GO:0071826	ribonucleoprotein complex subunit organization	26/654	143/16119	1.09565e-10	2.23087e-08	1.89785e-08	SNRNP200/MTIF2/DENR/PATL1/NPM1/USP39/LSM14A/SRSF1/EIF3A/EIF3L/PRMT5/C1QBP/EIF3H/CNOT1/STRAP/NIP7/PRPF19/NCBP1/DDX1/EIF3D/SF3A1/SF3A3/SF1/DDX23/EIF3E/TGS1	26
blue.GO:0006260	GO:0006260	DNA replication	39/654	306/16119	2.23153e-10	4.30451e-08	3.66194e-08	CENPF/RFC3/MCM3/DUT/FEN1/STAG2/MYBBP1A/SUPT16H/WRNIP1/RRM2/CACYBP/GTPBP4/RPA2/MCM4/NBN/SMC3/RBM14/SMC1A/RBBP7/MCM5/SLBP/MCM6/RPA1/CDK1/GMNN/PTGES3/MCM2/SSRP1/LONP1/PDS5A/MCMBP/RRM1/TFAM/RBBP4/NASP/CDT1/NUP98/CDK2/KIAA0101	39
blue.GO:0010564	GO:0010564	regulation of cell cycle process	50/654	473/16119	5.53751e-10	1.01475e-07	8.63269e-08	CUL4A/CDC16/BUB1/TRIAP1/CDKN1B/ANLN/DLGAP5/CENPF/PLK1/TCF3/CDC20/NEK2/BIRC5/RACGAP1/XPO1/BUB1B/PRKDC/PSME4/STAG2/DDB1/MYBBP1A/MAD2L1/NPM1/EZH2/CCNA2/TXLNG/CHMP4C/NUSAP1/CDCA5/RPA2/PRMT5/RCC1/PRPF40A/PSMD5/NBN/RCC2/SMC3/ZWINT/SMC1A/RB1/BUB3/CDK1/CCAR2/CCNB1/CTCF/ECT2/CDT1/CDK2/PKN2/PSMD7	50
blue.GO:0006403	GO:0006403	RNA localization	26/654	156/16119	7.92633e-10	1.2846e-07	1.09283e-07	SMG7/LRPPRC/NDC1/XPO1/SRSF1/NUP188/GLE1/CKAP5/HNRNPA1/XPOT/HNRNPA2B1/KHDRBS1/POLDIP3/SLBP/NUP205/NUP153/SRSF3/SRSF7/CPSF3/NCBP1/KHSRP/NUP50/XPO7/YY1/NUP98/EXOSC10	26
blue.GO:0051983	GO:0051983	regulation of chromosome segregation	12/654	30/16119	7.96076e-10	1.2846e-07	1.09283e-07	SPAG5/BUB1/KIF2C/NEK2/RACGAP1/CDCA5/RCC2/RB1/BUB3/CCNB1/CTCF/ECT2	12
blue.GO:0006323	GO:0006323	DNA packaging	25/654	145/16119	8.06158e-10	1.2846e-07	1.09283e-07	NCAPH/HJURP/SRPK1/PSME4/NAP1L4/NPM1/SMC2/NUSAP1/NCAPD2/ACIN1/MIS18A/CDCA5/CENPU/ANP32B/RBBP7/CDK1/MCM2/CCNB1/HMGB2/SMARCA5/CTCF/RBBP4/SMC4/NASP/BRD2	25
blue.GO:0000082	GO:0000082	G1/S transition of mitotic cell cycle	33/654	241/16119	8.76707e-10	1.33881e-07	1.13895e-07	CUL4A/IQGAP3/CDKN3/MYB/TRIAP1/CDKN1B/TCF3/MCM3/PRKDC/PSME4/EZH2/RRM2/CDCA5/TYMS/RPA2/MCM4/RCC1/PSMD5/TFDP1/RB1/CUL1/PPP6C/MCM5/MCM6/RPA1/CDK1/MCM2/CCNB1/CDT1/CDK2/PSMD7/SKP2/GSPT1	33
blue.GO:0044843	GO:0044843	cell cycle G1/S phase transition	33/654	243/16119	1.08799e-09	1.59499e-07	1.35689e-07	CUL4A/IQGAP3/CDKN3/MYB/TRIAP1/CDKN1B/TCF3/MCM3/PRKDC/PSME4/EZH2/RRM2/CDCA5/TYMS/RPA2/MCM4/RCC1/PSMD5/TFDP1/RB1/CUL1/PPP6C/MCM5/MCM6/RPA1/CDK1/MCM2/CCNB1/CDT1/CDK2/PSMD7/SKP2/GSPT1	33
blue.GO:0050657	GO:0050657	nucleic acid transport	24/654	149/16119	7.16631e-09	9.38018e-07	7.97993e-07	SMG7/LRPPRC/NDC1/XPO1/SRSF1/NUP188/GLE1/CKAP5/HNRNPA1/XPOT/HNRNPA2B1/KHDRBS1/POLDIP3/SLBP/NUP205/NUP153/SRSF3/SRSF7/CPSF3/NCBP1/KHSRP/NUP50/XPO7/NUP98	24
blue.GO:0050658	GO:0050658	RNA transport	24/654	149/16119	7.16631e-09	9.38018e-07	7.97993e-07	SMG7/LRPPRC/NDC1/XPO1/SRSF1/NUP188/GLE1/CKAP5/HNRNPA1/XPOT/HNRNPA2B1/KHDRBS1/POLDIP3/SLBP/NUP205/NUP153/SRSF3/SRSF7/CPSF3/NCBP1/KHSRP/NUP50/XPO7/NUP98	24
blue.GO:0051236	GO:0051236	establishment of RNA localization	24/654	149/16119	7.16631e-09	9.38018e-07	7.97993e-07	SMG7/LRPPRC/NDC1/XPO1/SRSF1/NUP188/GLE1/CKAP5/HNRNPA1/XPOT/HNRNPA2B1/KHDRBS1/POLDIP3/SLBP/NUP205/NUP153/SRSF3/SRSF7/CPSF3/NCBP1/KHSRP/NUP50/XPO7/NUP98	24
blue.GO:0034660	GO:0034660	ncRNA metabolic process	38/654	332/16119	8.06604e-09	1.00316e-06	8.53411e-07	NOL6/NOL11/DARS2/TFB2M/EPRS/SRRT/IARS2/NSUN2/GRSF1/YARS/LARS/PPA1/PRMT5/PA2G4/RTCB/ELAC2/KARS/SSB/NOP14/IARS/PES1/TRMT10C/RRP1B/WBP11/NCBP1/DDX1/KHSRP/FARSB/CIRH1A/TSEN15/RARS2/UTP18/AARS/NOLC1/RARS/EXOSC10/GAR1/TGS1	38
blue.GO:0071824	GO:0071824	protein-DNA complex subunit organization	24/654	150/16119	8.21142e-09	1.00316e-06	8.53411e-07	CENPF/HJURP/PSME4/NAP1L4/NPM1/SUPT16H/CAND1/SMARCC1/MIS18A/CENPU/HMGB1/ANP32B/RPA2/ANP32E/RB1/RBBP7/RPA1/MCM2/HMGB2/SMARCA5/CTCF/RBBP4/NASP/BRD2	24
blue.GO:0043044	GO:0043044	ATP-dependent chromatin remodeling	14/654	52/16119	1.2089e-08	1.42923e-06	1.21588e-06	HJURP/PSME4/NPM1/SMARCC1/MIS18A/CENPU/ANP32E/MTA2/HNRNPC/RBBP7/SMARCA5/HDAC1/RBBP4/NASP	14
blue.GO:0051168	GO:0051168	nuclear export	22/654	137/16119	3.21035e-08	3.67686e-06	3.12798e-06	SMG7/RANGAP1/XPO1/SRSF1/GLE1/RAN/HNRNPA1/XPOT/ANP32B/KHDRBS1/UHMK1/POLDIP3/SLBP/NUP153/LSG1/SRSF3/SRSF7/XPO6/CPSF3/NCBP1/HSPA9/XPO7	22
blue.GO:0006997	GO:0006997	nucleus organization	18/654	95/16119	4.20066e-08	4.66528e-06	3.96885e-06	SRPK1/PLK1/NDC1/CCNB2/PSME4/NUP188/PES1/NUP205/RRN3/ASUN/NUP153/CDK1/ZMPSTE24/CCNB1/HMGB2/NUP50/NUP98/NOLC1	18
blue.GO:0008608	GO:0008608	attachment of spindle microtubules to kinetochore	9/654	21/16119	5.35126e-08	5.76834e-06	4.90725e-06	SPAG5/CHAMP1/NEK2/RACGAP1/RCC2/RB1/BUB3/CCNB1/ECT2	9
blue.GO:0006913	GO:0006913	nucleocytoplasmic transport	39/654	376/16119	7.67548e-08	8.03733e-06	6.83753e-06	KPNA2/PPP3R1/SMG7/RANGAP1/TNPO1/XPO1/MYBBP1A/NPM1/SRSF1/GLE1/RAN/TNPO3/RBM22/TACC3/HNRNPA1/XPOT/ANP32B/IPO7/KHDRBS1/UHMK1/POLDIP3/SLBP/NUP205/NUP153/LSG1/KPNA3/SRSF3/CDK1/SRSF7/XPO6/KPNB1/CPSF3/NCBP1/HSPA9/ECT2/XPO7/NUP98/IPO5/TGS1	39
blue.GO:0000226	GO:0000226	microtubule cytoskeleton organization	36/654	333/16119	8.69595e-08	8.85296e-06	7.5314e-06	SPAG5/CDKN1B/PRC1/KIF2C/SKA3/KIF18B/CHAMP1/PLK1/NEK2/RACGAP1/XPO1/SKA2/SPRY2/NPM1/CKAP2/RAN/CKAP5/TACC3/NUSAP1/KIF11/KIFC1/RCC1/SLC16A1/RCC2/SMC3/SMC1A/RB1/FOPNL/ASUN/BUB3/KIF20A/CDK1/CCNB1/ECT2/CDK2/KIAA0101	36
blue.GO:0051169	GO:0051169	nuclear transport	39/654	381/16119	1.09063e-07	1.08031e-05	9.19044e-06	KPNA2/PPP3R1/SMG7/RANGAP1/TNPO1/XPO1/MYBBP1A/NPM1/SRSF1/GLE1/RAN/TNPO3/RBM22/TACC3/HNRNPA1/XPOT/ANP32B/IPO7/KHDRBS1/UHMK1/POLDIP3/SLBP/NUP205/NUP153/LSG1/KPNA3/SRSF3/CDK1/SRSF7/XPO6/KPNB1/CPSF3/NCBP1/HSPA9/ECT2/XPO7/NUP98/IPO5/TGS1	39
blue.GO:0007346	GO:0007346	regulation of mitotic cell cycle	39/654	386/16119	1.53816e-07	1.48352e-05	1.26206e-05	CUL4A/CDC16/BUB1/TRIAP1/CDKN1B/ANLN/DLGAP5/CENPF/PLK1/TCF3/CDC20/NEK2/BIRC5/BUB1B/PRKDC/PSME4/DDB1/MAD2L1/EZH2/CCNA2/CHMP4C/NUSAP1/RPA2/PRMT5/RCC1/PSMD5/NBN/RCC2/ZWINT/SMC1A/RB1/ASUN/BUB3/CDK1/CCNB1/CDC123/CDK2/PKN2/PSMD7	39
blue.GO:0006261	GO:0006261	DNA-dependent DNA replication	20/654	127/16119	1.8802e-07	1.73775e-05	1.47834e-05	RFC3/MCM3/FEN1/STAG2/MYBBP1A/WRNIP1/RPA2/MCM4/NBN/SMC3/SMC1A/MCM5/MCM6/RPA1/MCM2/LONP1/MCMBP/TFAM/CDT1/CDK2	20
blue.GO:0007093	GO:0007093	mitotic cell cycle checkpoint	24/654	176/16119	1.9058e-07	1.73775e-05	1.47834e-05	CDC16/BUB1/TRIAP1/CDKN1B/CENPF/PLK1/CDC20/BUB1B/PRKDC/PSME4/MAD2L1/CCNA2/CHMP4C/RPA2/PSMD5/NBN/ZWINT/SMC1A/RB1/BUB3/CDK1/CCNB1/CDK2/PSMD7	24
blue.GO:0006418	GO:0006418	tRNA aminoacylation for protein translation	12/654	46/16119	1.97156e-07	1.73775e-05	1.47834e-05	DARS2/EPRS/IARS2/YARS/LARS/PPA1/KARS/IARS/FARSB/RARS2/AARS/RARS	12
blue.GO:1901990	GO:1901990	regulation of mitotic cell cycle phase transition	30/654	257/16119	1.99141e-07	1.73775e-05	1.47834e-05	CUL4A/CDC16/BUB1/TRIAP1/CDKN1B/DLGAP5/CENPF/PLK1/TCF3/CDC20/BUB1B/PRKDC/PSME4/DDB1/MAD2L1/EZH2/CCNA2/CHMP4C/RPA2/PSMD5/NBN/RCC2/ZWINT/SMC1A/RB1/BUB3/CDK1/CCNB1/CDK2/PSMD7	30
blue.GO:0043486	GO:0043486	histone exchange	10/654	31/16119	2.31094e-07	1.92291e-05	1.63587e-05	HJURP/PSME4/NPM1/MIS18A/CENPU/ANP32E/RBBP7/SMARCA5/RBBP4/NASP	10
blue.GO:0006338	GO:0006338	chromatin remodeling	19/654	117/16119	2.3153e-07	1.92291e-05	1.63587e-05	MYB/HJURP/PSME4/NPM1/BAZ1B/SMARCC1/MIS18A/CENPU/CHD1L/ANP32E/MTA2/HNRNPC/RB1/RBBP7/MYC/SMARCA5/HDAC1/RBBP4/NASP	19
blue.GO:0015931	GO:0015931	nucleobase-containing compound transport	24/654	178/16119	2.36101e-07	1.92291e-05	1.63587e-05	SMG7/LRPPRC/NDC1/XPO1/SRSF1/NUP188/GLE1/CKAP5/HNRNPA1/XPOT/HNRNPA2B1/KHDRBS1/POLDIP3/SLBP/NUP205/NUP153/SRSF3/SRSF7/CPSF3/NCBP1/KHSRP/NUP50/XPO7/NUP98	24
blue.GO:0051028	GO:0051028	mRNA transport	20/654	129/16119	2.44415e-07	1.94735e-05	1.65665e-05	SMG7/LRPPRC/NDC1/XPO1/SRSF1/NUP188/GLE1/HNRNPA1/POLDIP3/SLBP/NUP205/NUP153/SRSF3/SRSF7/CPSF3/NCBP1/KHSRP/NUP50/XPO7/NUP98	20
blue.GO:0000075	GO:0000075	cell cycle checkpoint	29/654	247/16119	2.81022e-07	2.19137e-05	1.86425e-05	CUL4A/CDC16/BUB1/TRIAP1/CDKN1B/CENPF/PLK1/CDC20/BIRC5/BUB1B/PRKDC/PSME4/MAD2L1/CCNA2/CHMP4C/RPA2/PSMD5/NBN/ZWINT/SMC1A/RB1/WAC/BUB3/CDK1/CCAR2/CCNB1/CDT1/CDK2/PSMD7	29
blue.GO:0043038	GO:0043038	amino acid activation	12/654	49/16119	4.18085e-07	3.09012e-05	2.62883e-05	DARS2/EPRS/IARS2/YARS/LARS/PPA1/KARS/IARS/FARSB/RARS2/AARS/RARS	12
blue.GO:0043039	GO:0043039	tRNA aminoacylation	12/654	49/16119	4.18085e-07	3.09012e-05	2.62883e-05	DARS2/EPRS/IARS2/YARS/LARS/PPA1/KARS/IARS/FARSB/RARS2/AARS/RARS	12
blue.GO:1901987	GO:1901987	regulation of cell cycle phase transition	30/654	266/16119	4.21571e-07	3.09012e-05	2.62883e-05	CUL4A/CDC16/BUB1/TRIAP1/CDKN1B/DLGAP5/CENPF/PLK1/TCF3/CDC20/BUB1B/PRKDC/PSME4/DDB1/MAD2L1/EZH2/CCNA2/CHMP4C/RPA2/PSMD5/NBN/RCC2/ZWINT/SMC1A/RB1/BUB3/CDK1/CCNB1/CDK2/PSMD7	30
blue.GO:0043632	GO:0043632	modification-dependent macromolecule catabolic process	43/654	466/16119	4.48819e-07	3.22534e-05	2.74387e-05	CUL4A/CDC16/UBE2N/PCNP/RNF6/HSP90B1/STT3B/PLK1/USP7/UBE3C/CDC20/UBE2D3/BUB1B/PSME4/DDB1/MAD2L1/FOXRED2/USP39/DERL1/USP14/PSMD5/WWP1/TCEB1/CUL1/UBE2G1/USP1/KIAA0368/WAC/BUB3/CDK1/ZMPSTE24/USP10/UBAP1/CCAR2/CCNB1/LONP1/PTTG1/UBE2K/CDK2/PSMD7/SKP2/UBA2/EXOSC10	43
blue.GO:0051603	GO:0051603	proteolysis involved in cellular protein catabolic process	45/654	499/16119	4.60855e-07	3.24814e-05	2.76326e-05	CUL4A/CDC16/UBE2N/PCNP/RNF6/HSP90B1/STT3B/PLK1/USP7/UBE3C/CDC20/UBE2D3/BUB1B/PSME4/DDB1/MAD2L1/FOXRED2/USP39/DNAJC3/DERL1/USP14/PSMD5/WWP1/TCEB1/CUL1/UBE2G1/USP1/KIAA0368/WAC/BUB3/CDK1/ZMPSTE24/USP10/UBAP1/CCAR2/CCNB1/LONP1/PTTG1/IDE/UBE2K/CDK2/PSMD7/SKP2/UBA2/YME1L1	45
blue.GO:1901991	GO:1901991	negative regulation of mitotic cell cycle phase transition	25/654	199/16119	5.21903e-07	3.60901e-05	3.07026e-05	CDC16/BUB1/TRIAP1/CDKN1B/CENPF/PLK1/CDC20/BUB1B/PRKDC/PSME4/MAD2L1/EZH2/CCNA2/CHMP4C/RPA2/PSMD5/NBN/ZWINT/SMC1A/RB1/BUB3/CDK1/CCNB1/CDK2/PSMD7	25
blue.GO:0051303	GO:0051303	establishment of chromosome localization	9/654	27/16119	6.85391e-07	4.65177e-05	3.95736e-05	CDCA8/DLGAP5/CENPF/CHAMP1/BIRC5/CDCA5/RB1/ACTR2/CCNB1	9
blue.GO:0051988	GO:0051988	regulation of attachment of spindle microtubules to kinetochore	6/654	10/16119	7.96523e-07	5.27499e-05	4.48755e-05	SPAG5/NEK2/RACGAP1/RCC2/CCNB1/ECT2	6
blue.GO:0009161	GO:0009161	ribonucleoside monophosphate metabolic process	44/654	493/16119	8.22495e-07	5.27499e-05	4.48755e-05	SNRNP200/KIF4A/KIF2C/PRPS1/KIF18B/DDX18/IMPDH1/RFC3/ATAD2/PRPS2/OLA1/DHX9/ADSS/DLD/WRNIP1/ATIC/ACIN1/ABCF2/CHD1L/GART/DDX54/KIF11/CAD/KIFC1/DHX15/HSPD1/UQCRB/AK2/KIF20A/PAICS/CCT8/LONP1/UQCRC2/ABCE1/SMARCA5/DDX1/IDE/RBBP4/ATP6V1A/AHSA1/ATP5B/DDX21/G3BP1/DDX23	44
blue.GO:0007062	GO:0007062	sister chromatid cohesion	10/654	35/16119	8.2565e-07	5.27499e-05	4.48755e-05	BUB1/STAG2/CDCA5/SMC3/NAA50/SMC1A/RB1/CTCF/PDS5A/MCMBP	10
blue.GO:1901988	GO:1901988	negative regulation of cell cycle phase transition	25/654	204/16119	8.34788e-07	5.27499e-05	4.48755e-05	CDC16/BUB1/TRIAP1/CDKN1B/CENPF/PLK1/CDC20/BUB1B/PRKDC/PSME4/MAD2L1/EZH2/CCNA2/CHMP4C/RPA2/PSMD5/NBN/ZWINT/SMC1A/RB1/BUB3/CDK1/CCNB1/CDK2/PSMD7	25
blue.GO:0065004	GO:0065004	protein-DNA complex assembly	19/654	127/16119	8.55515e-07	5.31434e-05	4.52103e-05	CENPF/HJURP/NAP1L4/NPM1/CAND1/MIS18A/CENPU/HMGB1/ANP32B/RPA2/RB1/RBBP7/RPA1/MCM2/HMGB2/SMARCA5/RBBP4/NASP/BRD2	19
blue.GO:0019941	GO:0019941	modification-dependent protein catabolic process	42/654	462/16119	9.07662e-07	5.5443e-05	4.71666e-05	CUL4A/CDC16/UBE2N/PCNP/RNF6/HSP90B1/STT3B/PLK1/USP7/UBE3C/CDC20/UBE2D3/BUB1B/PSME4/DDB1/MAD2L1/FOXRED2/USP39/DERL1/USP14/PSMD5/WWP1/TCEB1/CUL1/UBE2G1/USP1/KIAA0368/WAC/BUB3/CDK1/ZMPSTE24/USP10/UBAP1/CCAR2/CCNB1/LONP1/PTTG1/UBE2K/CDK2/PSMD7/SKP2/UBA2	42
blue.GO:0032508	GO:0032508	DNA duplex unwinding	12/654	53/16119	1.04175e-06	6.17569e-05	5.25379e-05	XRCC5/MCM3/DHX9/CHD1L/MCM4/NBN/MCM5/MCM6/MCM2/DDX1/XRCC6/G3BP1	12
blue.GO:0006399	GO:0006399	tRNA metabolic process	20/654	141/16119	1.0544e-06	6.17569e-05	5.25379e-05	DARS2/EPRS/IARS2/NSUN2/GRSF1/YARS/LARS/PPA1/RTCB/ELAC2/KARS/SSB/IARS/TRMT10C/DDX1/FARSB/TSEN15/RARS2/AARS/RARS	20
blue.GO:0031145	GO:0031145	anaphase-promoting complex-dependent proteasomal ubiquitin-dependent protein catabolic process	15/654	83/16119	1.06158e-06	6.17569e-05	5.25379e-05	CDC16/PLK1/CDC20/BUB1B/PSME4/MAD2L1/PSMD5/CUL1/BUB3/CDK1/CCNB1/PTTG1/CDK2/PSMD7/SKP2	15
blue.GO:0034728	GO:0034728	nucleosome organization	18/654	117/16119	1.09087e-06	6.24692e-05	5.31439e-05	HJURP/PSME4/NAP1L4/NPM1/SUPT16H/SMARCC1/MIS18A/CENPU/ANP32B/ANP32E/RBBP7/MCM2/HMGB2/SMARCA5/CTCF/RBBP4/NASP/BRD2	18
blue.GO:0050000	GO:0050000	chromosome localization	9/654	29/16119	1.36157e-06	7.67715e-05	6.53112e-05	CDCA8/DLGAP5/CENPF/CHAMP1/BIRC5/CDCA5/RB1/ACTR2/CCNB1	9
blue.GO:0032392	GO:0032392	DNA geometric change	12/654	55/16119	1.59041e-06	8.83161e-05	7.51324e-05	XRCC5/MCM3/DHX9/CHD1L/MCM4/NBN/MCM5/MCM6/MCM2/DDX1/XRCC6/G3BP1	12
blue.GO:0042254	GO:0042254	ribosome biogenesis	22/654	171/16119	1.67077e-06	9.13937e-05	7.77506e-05	NOL6/GNL3/NOL11/TFB2M/XPO1/NPM1/RAN/GTPBP4/PA2G4/NOP14/PES1/C1QBP/RRN3/LSG1/NIP7/RRP1B/WBP11/CIRH1A/UTP18/NOLC1/EXOSC10/GAR1	22
blue.GO:0006270	GO:0006270	DNA replication initiation	9/654	30/16119	1.87549e-06	0.000101083	8.59938e-05	MCM3/WRNIP1/MCM4/NBN/MCM5/MCM6/MCM2/CDT1/CDK2	9
blue.GO:0034453	GO:0034453	microtubule anchoring	10/654	38/16119	1.90421e-06	0.000101144	8.60452e-05	SPAG5/CHAMP1/NEK2/RACGAP1/RCC2/RB1/FOPNL/BUB3/CCNB1/ECT2	10
blue.GO:0010948	GO:0010948	negative regulation of cell cycle process	28/654	257/16119	2.03682e-06	0.000106642	9.07227e-05	CDC16/BUB1/TRIAP1/CDKN1B/CENPF/PLK1/CDC20/BUB1B/PRKDC/PSME4/STAG2/MAD2L1/NPM1/EZH2/CCNA2/CHMP4C/RPA2/PSMD5/NBN/SMC3/ZWINT/SMC1A/RB1/BUB3/CDK1/CCNB1/CDK2/PSMD7	28
blue.GO:0009167	GO:0009167	purine ribonucleoside monophosphate metabolic process	42/654	479/16119	2.31483e-06	0.000119491	0.000101654	SNRNP200/KIF4A/KIF2C/KIF18B/DDX18/IMPDH1/RFC3/ATAD2/PRPS2/OLA1/DHX9/ADSS/DLD/WRNIP1/ATIC/ACIN1/ABCF2/CHD1L/GART/DDX54/KIF11/KIFC1/DHX15/HSPD1/UQCRB/AK2/KIF20A/PAICS/CCT8/LONP1/UQCRC2/ABCE1/SMARCA5/DDX1/IDE/RBBP4/ATP6V1A/AHSA1/ATP5B/DDX21/G3BP1/DDX23	42
blue.GO:0009126	GO:0009126	purine nucleoside monophosphate metabolic process	42/654	480/16119	2.44137e-06	0.000124273	0.000105722	SNRNP200/KIF4A/KIF2C/KIF18B/DDX18/IMPDH1/RFC3/ATAD2/PRPS2/OLA1/DHX9/ADSS/DLD/WRNIP1/ATIC/ACIN1/ABCF2/CHD1L/GART/DDX54/KIF11/KIFC1/DHX15/HSPD1/UQCRB/AK2/KIF20A/PAICS/CCT8/LONP1/UQCRC2/ABCE1/SMARCA5/DDX1/IDE/RBBP4/ATP6V1A/AHSA1/ATP5B/DDX21/G3BP1/DDX23	42
blue.GO:0030261	GO:0030261	chromosome condensation	9/654	31/16119	2.5482e-06	0.000127933	0.000108836	NCAPH/SMC2/NUSAP1/NCAPD2/ACIN1/CDCA5/CDK1/CCNB1/SMC4	9
blue.GO:0006446	GO:0006446	regulation of translational initiation	13/654	68/16119	2.87077e-06	0.000142181	0.000120956	MTIF2/NPM1/EIF3A/EIF3L/KHDRBS1/UHMK1/EIF3H/EIF4G1/NCBP1/DDX1/EIF2S1/EIF3D/EIF3E	13
blue.GO:0050684	GO:0050684	regulation of mRNA processing	13/654	69/16119	3.40768e-06	0.000166522	0.000141664	THRAP3/SRPK1/PABPC1/PTBP1/SRSF1/ACIN1/HNRNPA2B1/SNW1/C1QBP/CNOT1/SRSF7/CCNB1/NCBP1	13
blue.GO:0043161	GO:0043161	proteasome-mediated ubiquitin-dependent protein catabolic process	28/654	265/16119	3.71225e-06	0.000179019	0.000152295	CUL4A/CDC16/PCNP/HSP90B1/STT3B/PLK1/CDC20/UBE2D3/BUB1B/PSME4/DDB1/MAD2L1/FOXRED2/DERL1/PSMD5/WWP1/CUL1/KIAA0368/WAC/BUB3/CDK1/CCAR2/CCNB1/PTTG1/UBE2K/CDK2/PSMD7/SKP2	28
blue.GO:0010498	GO:0010498	proteasomal protein catabolic process	29/654	284/16119	4.92322e-06	0.000234333	0.000199352	CUL4A/CDC16/PCNP/HSP90B1/STT3B/PLK1/CDC20/UBE2D3/BUB1B/PSME4/DDB1/MAD2L1/FOXRED2/DERL1/USP14/PSMD5/WWP1/CUL1/KIAA0368/WAC/BUB3/CDK1/CCAR2/CCNB1/PTTG1/UBE2K/CDK2/PSMD7/SKP2	29
blue.GO:0031124	GO:0031124	mRNA 3'-end processing	15/654	94/16119	5.36487e-06	0.00025208	0.00021445	PAPOLA/CSTF2/GRSF1/PABPC1/SRSF1/NUDT21/SLBP/CNOT1/EIF4G1/SRSF3/CPSF7/SRSF7/CCNB1/CPSF3/NCBP1	15
blue.GO:0007076	GO:0007076	mitotic chromosome condensation	6/654	13/16119	5.86078e-06	0.000271896	0.000231308	NCAPH/SMC2/NUSAP1/NCAPD2/CDCA5/SMC4	6
blue.GO:0006271	GO:0006271	DNA strand elongation involved in DNA replication	9/654	34/16119	5.94389e-06	0.000272305	0.000231655	RFC3/MCM3/FEN1/RPA2/MCM4/MCM5/MCM6/RPA1/MCM2	9
blue.GO:0006333	GO:0006333	chromatin assembly or disassembly	18/654	132/16119	6.39201e-06	0.000289219	0.000246045	HJURP/NAP1L4/NPM1/SUPT16H/BAZ1B/SMARCC1/MIS18A/CENPU/ANP32B/MTA2/RBBP7/MCM2/HMGB2/SMARCA5/CTCF/RBBP4/NASP/BRD2	18
blue.GO:0007005	GO:0007005	mitochondrion organization	30/654	304/16119	6.73742e-06	0.00030113	0.000256178	PPP3R1/TRIAP1/LRPPRC/CLUH/DARS2/TFB2M/YWHAZ/TOMM20/HSPA4/MRPL44/OPA1/YWHAE/ELAC2/DAP3/LETM1/YWHAG/TFDP1/POLRMT/C1QBP/TRMT10C/TOMM70A/TOMM22/CCAR2/LONP1/HSPA9/TFAM/PRDX3/YWHAQ/TMEM70/YME1L1	30
blue.GO:0051052	GO:0051052	regulation of DNA metabolic process	27/654	259/16119	7.09446e-06	0.000313267	0.000266503	CUL4A/KPNA2/UBE2N/STAG2/NPM1/CEBPG/WRNIP1/MIS18A/CACYBP/DEK/GTPBP4/RPA2/KDM1B/RAD51AP1/NBN/SMC3/SMC1A/TFDP1/USP1/CDK1/GMNN/MYC/CCNB1/LONP1/PDS5A/CDT1/CDK2	27
blue.GO:0034502	GO:0034502	protein localization to chromosome	9/654	35/16119	7.71559e-06	0.000332678	0.000283016	RAD21/CHAMP1/PLK1/BUB1B/EZH2/CDCA5/RCC2/RB1/CDK1	9
blue.GO:0034508	GO:0034508	centromere complex assembly	9/654	35/16119	7.71559e-06	0.000332678	0.000283016	CENPF/HJURP/NPM1/MIS18A/CENPU/RB1/RBBP7/SMARCA5/RBBP4	9
blue.GO:0031123	GO:0031123	RNA 3'-end processing	16/654	109/16119	7.98619e-06	0.00033784	0.000287408	PAPOLA/CSTF2/GRSF1/PABPC1/SRSF1/NUDT21/ELAC2/SLBP/CNOT1/EIF4G1/SRSF3/CPSF7/SRSF7/CCNB1/CPSF3/NCBP1	16
blue.GO:0007052	GO:0007052	mitotic spindle organization	10/654	44/16119	8.01967e-06	0.00033784	0.000287408	PRC1/NEK2/RACGAP1/RAN/KIF11/RCC1/SMC3/SMC1A/ASUN/CCNB1	10
blue.GO:0006511	GO:0006511	ubiquitin-dependent protein catabolic process	39/654	453/16119	8.20085e-06	0.000341547	0.000290561	CUL4A/CDC16/UBE2N/PCNP/RNF6/HSP90B1/STT3B/PLK1/USP7/UBE3C/CDC20/UBE2D3/BUB1B/PSME4/DDB1/MAD2L1/FOXRED2/USP39/DERL1/USP14/PSMD5/WWP1/TCEB1/CUL1/UBE2G1/USP1/KIAA0368/WAC/BUB3/CDK1/USP10/UBAP1/CCAR2/CCNB1/PTTG1/UBE2K/CDK2/PSMD7/SKP2	39
blue.GO:0006302	GO:0006302	double-strand break repair	18/654	135/16119	8.79722e-06	0.000362267	0.000308189	TRIP13/UBE2N/RAD21/XRCC5/FEN1/PRKDC/BAZ1B/CDCA5/DEK/RPA2/RAD51AP1/NBN/TDP2/RPA1/SMARCA5/DDX1/YY1/XRCC6	18
blue.GO:0007064	GO:0007064	mitotic sister chromatid cohesion	6/654	14/16119	9.90457e-06	0.000400329	0.000340568	CDCA5/SMC3/NAA50/SMC1A/RB1/PDS5A	6
blue.GO:0007091	GO:0007091	metaphase/anaphase transition of mitotic cell cycle	10/654	45/16119	9.93995e-06	0.000400329	0.000340568	CDC16/BUB1/DLGAP5/CENPF/PLK1/CDC20/BUB1B/MAD2L1/RB1/BUB3	10
blue.GO:1903311	GO:1903311	regulation of mRNA metabolic process	13/654	76/16119	1.03728e-05	0.000413221	0.000351536	THRAP3/SRPK1/PABPC1/PTBP1/SRSF1/ACIN1/HNRNPA2B1/SNW1/C1QBP/CNOT1/SRSF7/CCNB1/NCBP1	13
blue.GO:0006369	GO:0006369	termination of RNA polymerase II transcription	10/654	46/16119	1.22441e-05	0.000474644	0.00040379	PAPOLA/CSTF2/SRSF1/NUDT21/SLBP/SRSF3/CPSF7/SRSF7/CPSF3/NCBP1	10
blue.GO:0044784	GO:0044784	metaphase/anaphase transition of cell cycle	10/654	46/16119	1.22441e-05	0.000474644	0.00040379	CDC16/BUB1/DLGAP5/CENPF/PLK1/CDC20/BUB1B/MAD2L1/RB1/BUB3	10
blue.GO:0000959	GO:0000959	mitochondrial RNA metabolic process	7/654	21/16119	1.23894e-05	0.000474644	0.00040379	LRPPRC/DARS2/TFB2M/ELAC2/POLRMT/TRMT10C/TFAM	7
blue.GO:0007077	GO:0007077	mitotic nuclear envelope disassembly	9/654	37/16119	1.26409e-05	0.000474644	0.00040379	PLK1/CCNB2/NUP188/NUP205/NUP153/CDK1/CCNB1/NUP50/NUP98	9
blue.GO:0022616	GO:0022616	DNA strand elongation	9/654	37/16119	1.26409e-05	0.000474644	0.00040379	RFC3/MCM3/FEN1/RPA2/MCM4/MCM5/MCM6/RPA1/MCM2	9
blue.GO:0006998	GO:0006998	nuclear envelope organization	11/654	56/16119	1.26917e-05	0.000474644	0.00040379	PLK1/CCNB2/NUP188/NUP205/ASUN/NUP153/CDK1/ZMPSTE24/CCNB1/NUP50/NUP98	11
blue.GO:0007051	GO:0007051	spindle organization	14/654	89/16119	1.30262e-05	0.000482232	0.000410245	SPAG5/PRC1/NEK2/RACGAP1/RAN/CKAP5/TACC3/KIF11/KIFC1/RCC1/SMC3/SMC1A/ASUN/CCNB1	14
blue.GO:0051439	GO:0051439	regulation of ubiquitin-protein ligase activity involved in mitotic cell cycle	13/654	78/16119	1.39009e-05	0.000509469	0.000433416	CDC16/PLK1/CDC20/BUB1B/PSME4/MAD2L1/PSMD5/CUL1/BUB3/CDK1/CCNB1/CDK2/PSMD7	13
blue.GO:0006283	GO:0006283	transcription-coupled nucleotide-excision repair	10/654	47/16119	1.4994e-05	0.000538754	0.00045833	USP7/RFC3/RPA2/HMGN1/RPA1/POLR2C/POLR2B/POLR2A/TCEA1/POLR2K	10
blue.GO:0043488	GO:0043488	regulation of mRNA stability	10/654	47/16119	1.4994e-05	0.000538754	0.00045833	THRAP3/PABPC1/SRSF1/DHX9/YTHDF2/HNRNPC/SYNCRIP/HNRNPD/HNRNPU/SERBP1	10
blue.GO:0030397	GO:0030397	membrane disassembly	9/654	39/16119	2.00243e-05	0.000705664	0.000600323	PLK1/CCNB2/NUP188/NUP205/NUP153/CDK1/CCNB1/NUP50/NUP98	9
blue.GO:0051081	GO:0051081	nuclear envelope disassembly	9/654	39/16119	2.00243e-05	0.000705664	0.000600323	PLK1/CCNB2/NUP188/NUP205/NUP153/CDK1/CCNB1/NUP50/NUP98	9
blue.GO:0006310	GO:0006310	DNA recombination	24/654	229/16119	2.07717e-05	0.000724967	0.000616746	KPNA2/TRIP13/UBE2N/TSN/RAD21/XRCC5/TCF3/RFC3/FEN1/PRKDC/NONO/SFPQ/HMGB3/HMGB1/RPA2/RAD51AP1/HSPD1/NBN/RBM14/RPA1/HMGB2/YY1/XRCC6/UNG	24
blue.GO:0006405	GO:0006405	RNA export from nucleus	13/654	81/16119	2.11655e-05	0.000724967	0.000616746	SMG7/SRSF1/GLE1/HNRNPA1/XPOT/KHDRBS1/POLDIP3/SLBP/NUP153/SRSF3/SRSF7/CPSF3/NCBP1	13
blue.GO:0048524	GO:0048524	positive regulation of viral process	13/654	81/16119	2.11655e-05	0.000724967	0.000616746	SRPK1/SUPT16H/CHMP4C/PPID/TCEB1/SNW1/POLR2C/SSRP1/NCBP1/POLR2B/POLR2A/TCEA1/POLR2K	13
blue.GO:0007088	GO:0007088	regulation of mitosis	16/654	118/16119	2.22252e-05	0.000754215	0.000641627	CDC16/BUB1/ANLN/DLGAP5/CENPF/PLK1/CDC20/NEK2/BIRC5/BUB1B/MAD2L1/NUSAP1/PRMT5/RCC1/RB1/BUB3	16
blue.GO:0034080	GO:0034080	CENP-A containing nucleosome assembly	7/654	23/16119	2.43318e-05	0.000810691	0.000689673	HJURP/NPM1/MIS18A/CENPU/RBBP7/SMARCA5/RBBP4	7
blue.GO:0061641	GO:0061641	CENP-A containing chromatin organization	7/654	23/16119	2.43318e-05	0.000810691	0.000689673	HJURP/NPM1/MIS18A/CENPU/RBBP7/SMARCA5/RBBP4	7
blue.GO:0043487	GO:0043487	regulation of RNA stability	10/654	50/16119	2.66519e-05	0.000879994	0.00074863	THRAP3/PABPC1/SRSF1/DHX9/YTHDF2/HNRNPC/SYNCRIP/HNRNPD/HNRNPU/SERBP1	10
blue.GO:0043484	GO:0043484	regulation of RNA splicing	12/654	72/16119	2.96436e-05	0.000970035	0.00082523	THRAP3/SRPK1/PTBP1/SRSF1/PTBP3/RBM22/ACIN1/HNRNPA2B1/SNW1/C1QBP/HNRNPF/SRSF7	12
blue.GO:0009124	GO:0009124	nucleoside monophosphate biosynthetic process	13/654	84/16119	3.156e-05	0.0010236	0.000870802	PRPS1/IMPDH1/DUT/DCK/PRPS2/ADSS/ATIC/GART/TYMS/CAD/AK2/PAICS/ATP5B	13
blue.GO:0030071	GO:0030071	regulation of mitotic metaphase/anaphase transition	10/654	51/16119	3.19617e-05	0.00102754	0.000874151	CDC16/BUB1/DLGAP5/CENPF/PLK1/CDC20/BUB1B/MAD2L1/RB1/BUB3	10
blue.GO:0006520	GO:0006520	cellular amino acid metabolic process	38/654	467/16119	3.75319e-05	0.00119225	0.00101427	FASN/ODC1/GLO1/GPT2/DARS2/EPRS/IARS2/PSME4/IVD/YARS/PTDSS1/ADSS/LARS/DLD/ATIC/AZIN1/GART/PPA1/TYMS/CAD/SHMT2/PSMD5/KARS/IARS/MTHFD1/SMS/MBOAT1/MAT2A/DLST/GOT2/FARSB/RARS2/AARS/ALDH5A1/PSAT1/PSMD7/RARS/MTHFD2	38
blue.GO:0030174	GO:0030174	regulation of DNA-dependent DNA replication initiation	4/654	6/16119	3.77355e-05	0.00119225	0.00101427	WRNIP1/NBN/CDT1/CDK2	4
blue.GO:1902099	GO:1902099	regulation of metaphase/anaphase transition of cell cycle	10/654	52/16119	3.81509e-05	0.00119507	0.00101667	CDC16/BUB1/DLGAP5/CENPF/PLK1/CDC20/BUB1B/MAD2L1/RB1/BUB3	10
blue.GO:0006336	GO:0006336	DNA replication-independent nucleosome assembly	8/654	33/16119	3.96783e-05	0.00121184	0.00103094	HJURP/NPM1/MIS18A/CENPU/RBBP7/SMARCA5/RBBP4/NASP	8
blue.GO:0034724	GO:0034724	DNA replication-independent nucleosome organization	8/654	33/16119	3.96783e-05	0.00121184	0.00103094	HJURP/NPM1/MIS18A/CENPU/RBBP7/SMARCA5/RBBP4/NASP	8
blue.GO:0090329	GO:0090329	regulation of DNA-dependent DNA replication	8/654	33/16119	3.96783e-05	0.00121184	0.00103094	STAG2/WRNIP1/NBN/SMC3/SMC1A/LONP1/CDT1/CDK2	8
blue.GO:0034470	GO:0034470	ncRNA processing	24/654	239/16119	4.18008e-05	0.00126612	0.00107711	NOL6/NOL11/TFB2M/SRRT/NSUN2/GRSF1/PA2G4/RTCB/ELAC2/KARS/SSB/NOP14/PES1/TRMT10C/RRP1B/WBP11/DDX1/CIRH1A/TSEN15/UTP18/AARS/NOLC1/EXOSC10/GAR1	24
blue.GO:0031055	GO:0031055	chromatin remodeling at centromere	7/654	25/16119	4.44451e-05	0.00133518	0.00113586	HJURP/NPM1/MIS18A/CENPU/RBBP7/SMARCA5/RBBP4	7
blue.GO:0006200	GO:0006200	ATP catabolic process	31/654	352/16119	4.49764e-05	0.00133996	0.00113993	SNRNP200/KIF4A/KIF2C/KIF18B/DDX18/RFC3/ATAD2/OLA1/DHX9/WRNIP1/ACIN1/ABCF2/CHD1L/DDX54/KIF11/KIFC1/DHX15/HSPD1/KIF20A/CCT8/LONP1/ABCE1/SMARCA5/DDX1/IDE/RBBP4/AHSA1/ATP5B/DDX21/G3BP1/DDX23	31
blue.GO:0031577	GO:0031577	spindle checkpoint	10/654	53/16119	4.53355e-05	0.00133996	0.00113993	CDC16/BUB1/CENPF/PLK1/CDC20/BIRC5/BUB1B/MAD2L1/BUB3/CCNB1	10
blue.GO:0000245	GO:0000245	spliceosomal complex assembly	9/654	43/16119	4.60885e-05	0.00134059	0.00114047	SNRNP200/USP39/SRSF1/PRPF19/DDX1/SF3A1/SF3A3/SF1/DDX23	9
blue.GO:0044786	GO:0044786	cell cycle DNA replication	9/654	43/16119	4.60885e-05	0.00134059	0.00114047	RFC3/FEN1/STAG2/RPA2/SMC3/SMC1A/SLBP/RPA1/CDT1	9
blue.GO:0046653	GO:0046653	tetrahydrofolate metabolic process	6/654	18/16119	5.32639e-05	0.00153594	0.00130666	ATIC/GART/TYMS/SHMT2/MTHFD1/MTHFD2	6
blue.GO:0050434	GO:0050434	positive regulation of viral transcription	10/654	54/16119	5.36427e-05	0.00153594	0.00130666	SUPT16H/TCEB1/SNW1/POLR2C/SSRP1/NCBP1/POLR2B/POLR2A/TCEA1/POLR2K	10
blue.GO:0009158	GO:0009158	ribonucleoside monophosphate catabolic process	31/654	356/16119	5.56604e-05	0.00155145	0.00131985	SNRNP200/KIF4A/KIF2C/KIF18B/DDX18/RFC3/ATAD2/OLA1/DHX9/WRNIP1/ACIN1/ABCF2/CHD1L/DDX54/KIF11/KIFC1/DHX15/HSPD1/KIF20A/CCT8/LONP1/ABCE1/SMARCA5/DDX1/IDE/RBBP4/AHSA1/ATP5B/DDX21/G3BP1/DDX23	31
blue.GO:0009169	GO:0009169	purine ribonucleoside monophosphate catabolic process	31/654	356/16119	5.56604e-05	0.00155145	0.00131985	SNRNP200/KIF4A/KIF2C/KIF18B/DDX18/RFC3/ATAD2/OLA1/DHX9/WRNIP1/ACIN1/ABCF2/CHD1L/DDX54/KIF11/KIFC1/DHX15/HSPD1/KIF20A/CCT8/LONP1/ABCE1/SMARCA5/DDX1/IDE/RBBP4/AHSA1/ATP5B/DDX21/G3BP1/DDX23	31
blue.GO:0048024	GO:0048024	regulation of mRNA splicing, via spliceosome	9/654	44/16119	5.58776e-05	0.00155145	0.00131985	THRAP3/SRPK1/PTBP1/SRSF1/ACIN1/HNRNPA2B1/SNW1/C1QBP/SRSF7	9
blue.GO:0071174	GO:0071174	mitotic spindle checkpoint	9/654	44/16119	5.58776e-05	0.00155145	0.00131985	CDC16/BUB1/CENPF/PLK1/CDC20/BUB1B/MAD2L1/BUB3/CCNB1	9
blue.GO:0009128	GO:0009128	purine nucleoside monophosphate catabolic process	31/654	357/16119	5.86674e-05	0.00161666	0.00137533	SNRNP200/KIF4A/KIF2C/KIF18B/DDX18/RFC3/ATAD2/OLA1/DHX9/WRNIP1/ACIN1/ABCF2/CHD1L/DDX54/KIF11/KIFC1/DHX15/HSPD1/KIF20A/CCT8/LONP1/ABCE1/SMARCA5/DDX1/IDE/RBBP4/AHSA1/ATP5B/DDX21/G3BP1/DDX23	31
blue.GO:0009112	GO:0009112	nucleobase metabolic process	11/654	66/16119	6.33531e-05	0.00173276	0.00147409	PRPS1/IMPDH1/DUT/DCK/ADSS/ATIC/GART/TYMS/CAD/PAICS/RRM1	11
blue.GO:0009125	GO:0009125	nucleoside monophosphate catabolic process	31/654	359/16119	6.51259e-05	0.00176805	0.00150412	SNRNP200/KIF4A/KIF2C/KIF18B/DDX18/RFC3/ATAD2/OLA1/DHX9/WRNIP1/ACIN1/ABCF2/CHD1L/DDX54/KIF11/KIFC1/DHX15/HSPD1/KIF20A/CCT8/LONP1/ABCE1/SMARCA5/DDX1/IDE/RBBP4/AHSA1/ATP5B/DDX21/G3BP1/DDX23	31
blue.GO:0006391	GO:0006391	transcription initiation from mitochondrial promoter	3/654	3/16119	6.64975e-05	0.00179201	0.0015245	TFB2M/POLRMT/TFAM	3
blue.GO:0000086	GO:0000086	G2/M transition of mitotic cell cycle	19/654	171/16119	6.73227e-05	0.00179576	0.00152769	MELK/CENPF/PLK1/NEK2/BIRC5/CCNB2/CCNA2/CHMP4C/CKAP5/YWHAE/KHDRBS1/RCC2/YWHAG/CUL1/CDK1/CCNB1/RBBP4/CDK2/SKP2	19
blue.GO:0045292	GO:0045292	mRNA cis splicing, via spliceosome	5/654	12/16119	6.76166e-05	0.00179576	0.00152769	SNRNP200/SRSF1/RBM22/NCBP1/DDX23	5
blue.GO:0051438	GO:0051438	regulation of ubiquitin-protein transferase activity	14/654	103/16119	6.96426e-05	0.00183626	0.00156215	CDC16/UBE2N/PLK1/CDC20/BUB1B/PSME4/MAD2L1/PSMD5/CUL1/BUB3/CDK1/CCNB1/CDK2/PSMD7	14
blue.GO:0001731	GO:0001731	formation of translation preinitiation complex	6/654	19/16119	7.51869e-05	0.00195433	0.00166259	DENR/EIF3A/EIF3L/EIF3H/EIF3D/EIF3E	6
blue.GO:0033119	GO:0033119	negative regulation of RNA splicing	6/654	19/16119	7.51869e-05	0.00195433	0.00166259	PTBP1/PTBP3/ACIN1/HNRNPA2B1/C1QBP/SRSF7	6
blue.GO:0044839	GO:0044839	cell cycle G2/M phase transition	19/654	173/16119	7.88372e-05	0.00203478	0.00173103	MELK/CENPF/PLK1/NEK2/BIRC5/CCNB2/CCNA2/CHMP4C/CKAP5/YWHAE/KHDRBS1/RCC2/YWHAG/CUL1/CDK1/CCNB1/RBBP4/CDK2/SKP2	19
blue.GO:0051292	GO:0051292	nuclear pore complex assembly	4/654	7/16119	8.52158e-05	0.00218403	0.001858	NDC1/NUP205/NUP153/NUP98	4
blue.GO:0006289	GO:0006289	nucleotide-excision repair	12/654	80/16119	8.64786e-05	0.002201	0.00187244	CUL4A/USP7/RFC3/DDB1/RPA2/HMGN1/RPA1/POLR2C/POLR2B/POLR2A/TCEA1/POLR2K	12
blue.GO:0043902	GO:0043902	positive regulation of multi-organism process	13/654	93/16119	9.3705e-05	0.00236847	0.00201491	SRPK1/SUPT16H/CHMP4C/PPID/TCEB1/SNW1/POLR2C/SSRP1/NCBP1/POLR2B/POLR2A/TCEA1/POLR2K	13
blue.GO:0009060	GO:0009060	aerobic respiration	9/654	47/16119	9.63474e-05	0.00241858	0.00205754	SUCLA2/DLD/NNT/UQCRB/ACO2/CS/UQCRC2/DLST/DLAT	9
blue.GO:0051310	GO:0051310	metaphase plate congression	6/654	20/16119	0.000103742	0.00258649	0.00220039	CDCA8/CENPF/CHAMP1/CDCA5/RB1/CCNB1	6
blue.GO:0006334	GO:0006334	nucleosome assembly	13/654	94/16119	0.000104784	0.00259481	0.00220746	HJURP/NAP1L4/NPM1/MIS18A/CENPU/ANP32B/RBBP7/MCM2/HMGB2/SMARCA5/RBBP4/NASP/BRD2	13
blue.GO:0046034	GO:0046034	ATP metabolic process	36/654	455/16119	0.000105769	0.00259516	0.00220776	SNRNP200/KIF4A/KIF2C/KIF18B/DDX18/RFC3/ATAD2/OLA1/DHX9/DLD/WRNIP1/ACIN1/ABCF2/CHD1L/DDX54/KIF11/KIFC1/DHX15/HSPD1/UQCRB/AK2/KIF20A/CCT8/LONP1/UQCRC2/ABCE1/SMARCA5/DDX1/IDE/RBBP4/ATP6V1A/AHSA1/ATP5B/DDX21/G3BP1/DDX23	36
blue.GO:0033151	GO:0033151	V(D)J recombination	5/654	13/16119	0.000106214	0.00259516	0.00220776	TCF3/PRKDC/HMGB1/HMGB2/XRCC6	5
blue.GO:0031497	GO:0031497	chromatin assembly	14/654	108/16119	0.000117392	0.00283054	0.002408	HJURP/NAP1L4/NPM1/MIS18A/CENPU/ANP32B/RBBP7/MCM2/HMGB2/SMARCA5/CTCF/RBBP4/NASP/BRD2	14
blue.GO:0051340	GO:0051340	regulation of ligase activity	14/654	108/16119	0.000117392	0.00283054	0.002408	CDC16/UBE2N/PLK1/CDC20/BUB1B/PSME4/MAD2L1/PSMD5/CUL1/BUB3/CDK1/CCNB1/CDK2/PSMD7	14
blue.GO:0051302	GO:0051302	regulation of cell division	23/654	240/16119	0.000122513	0.00293472	0.00249663	CDC16/BUB1/ANLN/DLGAP5/CENPF/KIF18B/PLK1/CDC20/NEK2/BIRC5/RACGAP1/BUB1B/MAD2L1/CHMP4C/NUSAP1/PRMT5/RCC1/PRPF40A/RB1/BUB3/MYC/ECT2/PKN2	23
blue.GO:0006099	GO:0006099	tricarboxylic acid cycle	7/654	29/16119	0.000125269	0.00296201	0.00251985	SUCLA2/DLD/NNT/ACO2/CS/DLST/DLAT	7
blue.GO:0061640	GO:0061640	cytoskeleton-dependent cytokinesis	7/654	29/16119	0.000125269	0.00296201	0.00251985	ANLN/PLK1/RACGAP1/CKAP2/CEP55/NUSAP1/ACTR2	7
blue.GO:0000281	GO:0000281	mitotic cytokinesis	6/654	21/16119	0.000140283	0.00327476	0.00278591	ANLN/PLK1/RACGAP1/CKAP2/CEP55/NUSAP1	6
blue.GO:1903312	GO:1903312	negative regulation of mRNA metabolic process	6/654	21/16119	0.000140283	0.00327476	0.00278591	PABPC1/PTBP1/ACIN1/HNRNPA2B1/C1QBP/SRSF7	6
blue.GO:0071168	GO:0071168	protein localization to chromatin	5/654	14/16119	0.000159719	0.00370488	0.00315182	RAD21/PLK1/EZH2/CDCA5/RB1	5
blue.GO:0000910	GO:0000910	cytokinesis	15/654	125/16119	0.000163925	0.00377853	0.00321448	ANLN/PRC1/PLK1/INCENP/BIRC5/RACGAP1/CKAP2/CEP55/CHMP4C/NUSAP1/PRPF40A/KIF20A/ACTR2/ECT2/PKN2	15
blue.GO:0007094	GO:0007094	mitotic spindle assembly checkpoint	8/654	40/16119	0.000171026	0.00391756	0.00333276	CDC16/BUB1/CENPF/PLK1/CDC20/BUB1B/MAD2L1/BUB3	8
blue.GO:0050685	GO:0050685	positive regulation of mRNA processing	6/654	22/16119	0.000186313	0.00424122	0.0036081	THRAP3/PABPC1/SNW1/CNOT1/CCNB1/NCBP1	6
blue.GO:0050792	GO:0050792	regulation of viral process	17/654	156/16119	0.000202978	0.00458177	0.00389781	SRPK1/SUPT16H/CHMP4C/PPID/DERL1/TRIM25/TCEB1/SNW1/ILF3/POLR2C/SSRP1/NCBP1/POLR2B/HDAC1/POLR2A/TCEA1/POLR2K	17
blue.GO:0045841	GO:0045841	negative regulation of mitotic metaphase/anaphase transition	8/654	41/16119	0.000205023	0.00458177	0.00389781	CDC16/BUB1/CENPF/PLK1/CDC20/BUB1B/MAD2L1/BUB3	8
blue.GO:0071173	GO:0071173	spindle assembly checkpoint	8/654	41/16119	0.000205023	0.00458177	0.00389781	CDC16/BUB1/CENPF/PLK1/CDC20/BUB1B/MAD2L1/BUB3	8
blue.GO:0006413	GO:0006413	translational initiation	18/654	171/16119	0.000206645	0.00459002	0.00390483	MTIF2/DENR/PABPC1/EIF3A/EIF3L/KHDRBS1/UHMK1/LARP1/EIF2S3/RPL30/EIF3H/EIF4G1/EIF1AX/NCBP1/DDX1/EIF2S1/EIF3D/EIF3E	18
blue.GO:0006352	GO:0006352	DNA-templated transcription, initiation	22/654	233/16119	0.00021125	0.00466403	0.00396779	THRAP3/MED14/TFB2M/UBE2D3/CAND1/HMGB1/NR0B2/TFDP1/MED30/POLRMT/SNW1/RRN3/POLR2C/MED4/MYC/SMARCA5/POLR2B/HDAC1/TFAM/POLR2A/CCNC/POLR2K	22
blue.GO:0019058	GO:0019058	viral life cycle	27/654	315/16119	0.000213962	0.00469564	0.00399468	CTBP2/SRPK1/XPO1/HTATSF1/SUPT16H/RAN/CHMP4C/PPID/DEK/DERL1/TRIM25/RPL30/WWP1/TCEB1/SNW1/ILF3/NUP153/KPNA3/POLR2C/SSRP1/KPNB1/NCBP1/POLR2B/HDAC1/POLR2A/TCEA1/POLR2K	27
blue.GO:0045786	GO:0045786	negative regulation of cell cycle	29/654	350/16119	0.000225953	0.00492926	0.00419343	CUL4A/CDC16/CDKN3/BUB1/TRIAP1/CDKN1B/CENPF/PLK1/CDC20/BUB1B/PSME4/MYBBP1A/MAD2L1/CHMP4C/PPM1G/PA2G4/KHDRBS1/UHMK1/PSMD5/NBN/RB1/CUL1/BUB3/GMNN/MYC/CDC123/HDAC1/CDK2/PSMD7	29
blue.GO:0007080	GO:0007080	mitotic metaphase plate congression	5/654	15/16119	0.000231608	0.00499319	0.00424782	CDCA8/CHAMP1/CDCA5/RB1/CCNB1	5
blue.GO:0048025	GO:0048025	negative regulation of mRNA splicing, via spliceosome	5/654	15/16119	0.000231608	0.00499319	0.00424782	PTBP1/ACIN1/HNRNPA2B1/C1QBP/SRSF7	5
blue.GO:0046782	GO:0046782	regulation of viral transcription	11/654	76/16119	0.00023403	0.00499397	0.00424848	SUPT16H/TCEB1/SNW1/POLR2C/SSRP1/NCBP1/POLR2B/HDAC1/POLR2A/TCEA1/POLR2K	11
blue.GO:0097193	GO:0097193	intrinsic apoptotic signaling pathway	24/654	267/16119	0.000234369	0.00499397	0.00424848	CUL4A/PPP3R1/BUB1/TRIAP1/MELK/YWHAZ/PRKDC/NONO/MYBBP1A/KDM1A/SFPQ/OPA1/YWHAE/NBN/YWHAG/TFDP1/SNW1/CUL1/RRN3/STK24/CCAR2/UBE2K/UBQLN1/YWHAQ	24
blue.GO:0042558	GO:0042558	pteridine-containing compound metabolic process	7/654	32/16119	0.000243004	0.00514728	0.0043789	ATIC/GART/TYMS/SHMT2/MTHFD1/NIF3L1/MTHFD2	7
blue.GO:1902100	GO:1902100	negative regulation of metaphase/anaphase transition of cell cycle	8/654	42/16119	0.000244373	0.00514728	0.0043789	CDC16/BUB1/CENPF/PLK1/CDC20/BUB1B/MAD2L1/BUB3	8
blue.GO:0051783	GO:0051783	regulation of nuclear division	16/654	144/16119	0.000247687	0.00518728	0.00441293	CDC16/BUB1/ANLN/DLGAP5/CENPF/PLK1/CDC20/NEK2/BIRC5/BUB1B/MAD2L1/NUSAP1/PRMT5/RCC1/RB1/BUB3	16
blue.GO:0007126	GO:0007126	meiotic nuclear division	18/654	174/16119	0.000256674	0.00531078	0.00451799	TRIP13/RAD21/PLK1/CDC20/NDC1/NEK2/STAG2/SMC2/MKI67/NBN/SMC3/SMC1A/RPA1/BUB3/ACTR2/SMC4/CDK2/CKS2	18
blue.GO:0001732	GO:0001732	formation of translation initiation complex	3/654	4/16119	0.000257931	0.00531078	0.00451799	MTIF2/EIF3A/EIF3D	3
blue.GO:0007000	GO:0007000	nucleolus organization	3/654	4/16119	0.000257931	0.00531078	0.00451799	PES1/RRN3/NOLC1	3
blue.GO:0046931	GO:0046931	pore complex assembly	4/654	9/16119	0.000287389	0.00588425	0.00500586	NDC1/NUP205/NUP153/NUP98	4
blue.GO:0031503	GO:0031503	protein complex localization	5/654	16/16119	0.000325687	0.00659472	0.00561027	NDC1/BIRC5/RAN/RCC2/MZT1	5
blue.GO:0042559	GO:0042559	pteridine-containing compound biosynthetic process	5/654	16/16119	0.000325687	0.00659472	0.00561027	ATIC/GART/MTHFD1/NIF3L1/MTHFD2	5
blue.GO:0051656	GO:0051656	establishment of organelle localization	21/654	227/16119	0.000384613	0.00774508	0.00658891	CDCA8/DLGAP5/CENPF/LRPPRC/CHAMP1/KLHL12/BIRC5/XPO1/CANX/COPB1/SPRY2/AP1AR/RAN/NUSAP1/CDCA5/ARCN1/RB1/AP3M1/ACTR2/CCNB1/SEC24C	21
blue.GO:0006760	GO:0006760	folic acid-containing compound metabolic process	6/654	25/16119	0.000398585	0.0079826	0.00679097	ATIC/GART/TYMS/SHMT2/MTHFD1/MTHFD2	6
blue.GO:0032886	GO:0032886	regulation of microtubule-based process	14/654	122/16119	0.000426914	0.00850347	0.00723409	SPAG5/CDKN1B/SKA3/NEK2/RACGAP1/XPO1/SKA2/NPM1/CKAP2/CFAP20/TACC3/RCC2/CCNB1/ECT2	14
blue.GO:0051321	GO:0051321	meiotic cell cycle	18/654	182/16119	0.000444862	0.00878952	0.00747743	TRIP13/RAD21/PLK1/CDC20/NDC1/NEK2/STAG2/SMC2/MKI67/NBN/SMC3/SMC1A/RPA1/BUB3/ACTR2/SMC4/CDK2/CKS2	18
blue.GO:0050686	GO:0050686	negative regulation of mRNA processing	5/654	17/16119	0.000446071	0.00878952	0.00747743	PTBP1/ACIN1/HNRNPA2B1/C1QBP/SRSF7	5
blue.GO:0006999	GO:0006999	nuclear pore organization	4/654	10/16119	0.000463631	0.00899051	0.00764842	NDC1/NUP205/NUP153/NUP98	4
blue.GO:0009396	GO:0009396	folic acid-containing compound biosynthetic process	4/654	10/16119	0.000463631	0.00899051	0.00764842	ATIC/GART/MTHFD1/MTHFD2	4
blue.GO:0034501	GO:0034501	protein localization to kinetochore	4/654	10/16119	0.000463631	0.00899051	0.00764842	CHAMP1/BUB1B/RCC2/CDK1	4
blue.GO:0043414	GO:0043414	macromolecule methylation	19/654	199/16119	0.000486026	0.00937519	0.00797568	MYB/SUZ12/TFB2M/NSUN2/PCMT1/ETF1/EZH2/KDM1A/MIS18A/PRMT5/KDM1B/MTA2/SNW1/CTCF/RAB6A/DNMT1/ICMT/GSPT1/TGS1	19
blue.GO:0000723	GO:0000723	telomere maintenance	10/654	70/16119	0.000496499	0.00952706	0.00810487	XRCC5/RFC3/FEN1/PRKDC/RPA2/NBN/RPA1/PTGES3/MYC/XRCC6	10
blue.GO:1903313	GO:1903313	positive regulation of mRNA metabolic process	6/654	26/16119	0.00050055	0.00955477	0.00812845	THRAP3/PABPC1/SNW1/CNOT1/CCNB1/NCBP1	6
blue.GO:0032200	GO:0032200	telomere organization	10/654	71/16119	0.000557287	0.0105827	0.00900292	XRCC5/RFC3/FEN1/PRKDC/RPA2/NBN/RPA1/PTGES3/MYC/XRCC6	10
blue.GO:0070507	GO:0070507	regulation of microtubule cytoskeleton organization	12/654	98/16119	0.000600739	0.011349	0.00965484	SPAG5/CDKN1B/SKA3/NEK2/RACGAP1/XPO1/SKA2/NPM1/CKAP2/RCC2/CCNB1/ECT2	12
blue.GO:0090305	GO:0090305	nucleic acid phosphodiester bond hydrolysis	20/654	219/16119	0.000618607	0.0113799	0.00968112	UBE2N/SND1/TSN/CSTF2/FEN1/MRPL44/HRSP12/HMGB1/ELAC2/TDP2/NOP14/CNOT1/HMGB2/KPNB1/CPSF3/NCBP1/DDX1/TSEN15/G3BP1/EXOSC10	20
blue.GO:1900739	GO:1900739	regulation of protein insertion into mitochondrial membrane involved in apoptotic signaling pathway	6/654	27/16119	0.000621708	0.0113799	0.00968112	PPP3R1/YWHAZ/YWHAE/YWHAG/TFDP1/YWHAQ	6
blue.GO:1900740	GO:1900740	positive regulation of protein insertion into mitochondrial membrane involved in apoptotic signaling pathway	6/654	27/16119	0.000621708	0.0113799	0.00968112	PPP3R1/YWHAZ/YWHAE/YWHAG/TFDP1/YWHAQ	6
blue.GO:0000389	GO:0000389	mRNA 3'-splice site recognition	3/654	5/16119	0.000625333	0.0113799	0.00968112	SF3A1/SF3A3/SF1	3
blue.GO:0010216	GO:0010216	maintenance of DNA methylation	3/654	5/16119	0.000625333	0.0113799	0.00968112	USP7/CTCF/DNMT1	3
blue.GO:0032876	GO:0032876	negative regulation of DNA endoreduplication	3/654	5/16119	0.000625333	0.0113799	0.00968112	STAG2/SMC3/SMC1A	3
blue.GO:0070934	GO:0070934	CRD-mediated mRNA stabilization	3/654	5/16119	0.000625333	0.0113799	0.00968112	DHX9/SYNCRIP/HNRNPU	3
blue.GO:0072655	GO:0072655	establishment of protein localization to mitochondrion	11/654	85/16119	0.000627213	0.0113799	0.00968112	PPP3R1/YWHAZ/TOMM20/HSPA4/YWHAE/YWHAG/TFDP1/TOMM70A/TOMM22/HSPA9/YWHAQ	11
blue.GO:0051640	GO:0051640	organelle localization	24/654	286/16119	0.000638403	0.0115258	0.00980528	CDCA8/DLGAP5/CENPF/LRPPRC/CLUH/CHAMP1/KLHL12/BIRC5/XPO1/CANX/COPB1/SPRY2/AP1AR/RAN/TACC3/NUSAP1/CDCA5/ARCN1/RB1/AP3M1/ASUN/ACTR2/CCNB1/SEC24C	24
blue.GO:0006450	GO:0006450	regulation of translational fidelity	4/654	11/16119	0.000705245	0.0125472	0.0106742	IARS2/LARS/IARS/AARS	4
blue.GO:0006596	GO:0006596	polyamine biosynthetic process	4/654	11/16119	0.000705245	0.0125472	0.0106742	ODC1/AZIN1/SMS/AMD1	4
blue.GO:0007063	GO:0007063	regulation of sister chromatid cohesion	4/654	11/16119	0.000705245	0.0125472	0.0106742	BUB1/CDCA5/RB1/CTCF	4
blue.GO:0006611	GO:0006611	protein export from nucleus	8/654	49/16119	0.000727452	0.0128178	0.0109044	RANGAP1/XPO1/RAN/ANP32B/UHMK1/XPO6/HSPA9/XPO7	8
blue.GO:0031100	GO:0031100	organ regeneration	8/654	49/16119	0.000727452	0.0128178	0.0109044	PRPS2/MKI67/CCNA2/ATIC/TYMS/CAD/NR0B2/CDK1	8
blue.GO:0043631	GO:0043631	RNA polyadenylation	6/654	28/16119	0.000764415	0.0133565	0.0113627	PAPOLA/CSTF2/GRSF1/PABPC1/NUDT21/CPSF3	6
blue.GO:0006353	GO:0006353	DNA-templated transcription, termination	11/654	87/16119	0.00076531	0.0133565	0.0113627	PAPOLA/CSTF2/SRSF1/NUDT21/SLBP/SRSF3/CPSF7/SRSF7/CPSF3/NCBP1/POLR2K	11
blue.GO:0042752	GO:0042752	regulation of circadian rhythm	10/654	74/16119	0.000777658	0.0135077	0.0114913	PRKDC/NONO/TIMELESS/EZH2/SFPQ/ARNTL2/PPP1CC/CCAR2/PSPC1/HNRNPD	10
blue.GO:1902850	GO:1902850	microtubule cytoskeleton organization involved in mitosis	5/654	19/16119	0.000783566	0.0135461	0.0115239	CHAMP1/NEK2/RACGAP1/KIF11/RB1	5
blue.GO:0031570	GO:0031570	DNA integrity checkpoint	16/654	160/16119	0.00080415	0.0138367	0.0117712	CUL4A/TRIAP1/CDKN1B/PLK1/PRKDC/PSME4/CCNA2/RPA2/PSMD5/NBN/WAC/CDK1/CCAR2/CDT1/CDK2/PSMD7	16
blue.GO:0045839	GO:0045839	negative regulation of mitosis	8/654	50/16119	0.00083574	0.014313	0.0121764	CDC16/BUB1/CENPF/PLK1/CDC20/BUB1B/MAD2L1/BUB3	8
blue.GO:0030518	GO:0030518	intracellular steroid hormone receptor signaling pathway	13/654	116/16119	0.00084829	0.0144604	0.0123018	RNF6/THRAP3/MED14/RAN/DDX54/RBM14/MED30/RB1/CNOT1/MED4/PTGES3/HDAC1/SKP2	13
blue.GO:0051297	GO:0051297	centrosome organization	10/654	75/16119	0.000865355	0.014661	0.0124724	PLK1/NEK2/XPO1/NPM1/CKAP5/KIF11/SLC16A1/CDK1/CDK2/KIAA0101	10
blue.GO:0006144	GO:0006144	purine nucleobase metabolic process	7/654	39/16119	0.00086806	0.014661	0.0124724	PRPS1/IMPDH1/DCK/ADSS/ATIC/GART/PAICS	7
blue.GO:0070585	GO:0070585	protein localization to mitochondrion	11/654	89/16119	0.000927741	0.0154419	0.0131368	PPP3R1/YWHAZ/TOMM20/HSPA4/YWHAE/YWHAG/TFDP1/TOMM70A/TOMM22/HSPA9/YWHAQ	11
blue.GO:0001844	GO:0001844	protein insertion into mitochondrial membrane involved in apoptotic signaling pathway	6/654	29/16119	0.000931149	0.0154419	0.0131368	PPP3R1/YWHAZ/YWHAE/YWHAG/TFDP1/YWHAQ	6
blue.GO:0043489	GO:0043489	RNA stabilization	6/654	29/16119	0.000931149	0.0154419	0.0131368	THRAP3/PABPC1/DHX9/HNRNPC/SYNCRIP/HNRNPU	6
blue.GO:0048255	GO:0048255	mRNA stabilization	6/654	29/16119	0.000931149	0.0154419	0.0131368	THRAP3/PABPC1/DHX9/HNRNPC/SYNCRIP/HNRNPU	6
blue.GO:0043903	GO:0043903	regulation of symbiosis, encompassing mutualism through parasitism	17/654	178/16119	0.000941373	0.0155411	0.0132212	SRPK1/SUPT16H/CHMP4C/PPID/DERL1/TRIM25/TCEB1/SNW1/ILF3/POLR2C/SSRP1/NCBP1/POLR2B/HDAC1/POLR2A/TCEA1/POLR2K	17
blue.GO:0002562	GO:0002562	somatic diversification of immune receptors via germline recombination within a single locus	8/654	51/16119	0.000956595	0.0156514	0.013315	TCF3/PRKDC/HMGB1/HSPD1/NBN/HMGB2/XRCC6/UNG	8
blue.GO:0016444	GO:0016444	somatic cell DNA recombination	8/654	51/16119	0.000956595	0.0156514	0.013315	TCF3/PRKDC/HMGB1/HSPD1/NBN/HMGB2/XRCC6/UNG	8
blue.GO:0006275	GO:0006275	regulation of DNA replication	13/654	118/16119	0.000996238	0.0162276	0.0138052	STAG2/WRNIP1/CACYBP/GTPBP4/NBN/SMC3/SMC1A/CDK1/GMNN/LONP1/PDS5A/CDT1/CDK2	13
blue.GO:0009263	GO:0009263	deoxyribonucleotide biosynthetic process	4/654	12/16119	0.00102406	0.0164613	0.014004	DUT/RRM2/TYMS/RRM1	4
blue.GO:0034629	GO:0034629	cellular protein complex localization	4/654	12/16119	0.00102406	0.0164613	0.014004	NDC1/RAN/RCC2/MZT1	4
blue.GO:0046040	GO:0046040	IMP metabolic process	4/654	12/16119	0.00102406	0.0164613	0.014004	ADSS/ATIC/GART/PAICS	4
blue.GO:0045727	GO:0045727	positive regulation of translation	9/654	64/16119	0.00105502	0.016885	0.0143644	NPM1/PABPC1/KHDRBS1/UHMK1/LARP1/GUF1/C1QBP/POLDIP3/HNRNPD	9
blue.GO:0009156	GO:0009156	ribonucleoside monophosphate biosynthetic process	10/654	77/16119	0.00106516	0.0169731	0.0144394	PRPS1/IMPDH1/PRPS2/ADSS/ATIC/GART/CAD/AK2/PAICS/ATP5B	10
blue.GO:0006354	GO:0006354	DNA-templated transcription, elongation	13/654	119/16119	0.00107795	0.0171025	0.0145495	HTATSF1/EZH2/SUPT16H/HMGN1/TCEB1/POLR2C/CCAR2/SSRP1/NCBP1/POLR2B/POLR2A/TCEA1/POLR2K	13
blue.GO:0051204	GO:0051204	protein insertion into mitochondrial membrane	6/654	30/16119	0.0011245	0.0177643	0.0151124	PPP3R1/YWHAZ/YWHAE/YWHAG/TFDP1/YWHAQ	6
blue.GO:0006364	GO:0006364	rRNA processing	13/654	120/16119	0.00116518	0.0183278	0.0155919	NOL6/NOL11/TFB2M/PA2G4/NOP14/PES1/RRP1B/WBP11/CIRH1A/UTP18/NOLC1/EXOSC10/GAR1	13
blue.GO:0006189	GO:0006189	de novo' IMP biosynthetic process	3/654	6/16119	0.00121293	0.0188364	0.0160245	ATIC/GART/PAICS	3
blue.GO:0009157	GO:0009157	deoxyribonucleoside monophosphate biosynthetic process	3/654	6/16119	0.00121293	0.0188364	0.0160245	DUT/DCK/TYMS	3
blue.GO:0034720	GO:0034720	histone H3-K4 demethylation	3/654	6/16119	0.00121293	0.0188364	0.0160245	KDM5C/KDM1A/KDM1B	3
blue.GO:0000077	GO:0000077	DNA damage checkpoint	15/654	151/16119	0.0012385	0.0191524	0.0162934	CUL4A/TRIAP1/CDKN1B/PLK1/PRKDC/PSME4/CCNA2/RPA2/PSMD5/NBN/WAC/CDK1/CCAR2/CDK2/PSMD7	15
blue.GO:0002200	GO:0002200	somatic diversification of immune receptors	8/654	54/16119	0.00140507	0.0216368	0.0184069	TCF3/PRKDC/HMGB1/HSPD1/NBN/HMGB2/XRCC6/UNG	8
blue.GO:0046112	GO:0046112	nucleobase biosynthetic process	4/654	13/16119	0.00143199	0.0219592	0.0186812	PRPS1/GART/CAD/PAICS	4
blue.GO:0090068	GO:0090068	positive regulation of cell cycle process	19/654	218/16119	0.00145798	0.0222293	0.018911	CUL4A/TRIAP1/CDKN1B/DLGAP5/PLK1/BIRC5/RACGAP1/PSME4/MYBBP1A/MAD2L1/NUSAP1/PSMD5/RCC2/RB1/CCAR2/ECT2/CDK2/PKN2/PSMD7	19
blue.GO:0010821	GO:0010821	regulation of mitochondrion organization	11/654	94/16119	0.00146174	0.0222293	0.018911	PPP3R1/TRIAP1/LRPPRC/YWHAZ/OPA1/YWHAE/YWHAG/TFDP1/C1QBP/LONP1/YWHAQ	11
blue.GO:0031023	GO:0031023	microtubule organizing center organization	10/654	81/16119	0.00157814	0.023812	0.0202573	PLK1/NEK2/XPO1/NPM1/CKAP5/KIF11/SLC16A1/CDK1/CDK2/KIAA0101	10
blue.GO:0000059	GO:0000059	protein import into nucleus, docking	2/654	2/16119	0.00164377	0.023812	0.0202573	NUP205/NUP98	2
blue.GO:0000354	GO:0000354	cis assembly of pre-catalytic spliceosome	2/654	2/16119	0.00164377	0.023812	0.0202573	SNRNP200/DDX23	2
blue.GO:0006428	GO:0006428	isoleucyl-tRNA aminoacylation	2/654	2/16119	0.00164377	0.023812	0.0202573	IARS2/IARS	2
blue.GO:0006597	GO:0006597	spermine biosynthetic process	2/654	2/16119	0.00164377	0.023812	0.0202573	SMS/AMD1	2
blue.GO:0009177	GO:0009177	pyrimidine deoxyribonucleoside monophosphate biosynthetic process	2/654	2/16119	0.00164377	0.023812	0.0202573	DUT/TYMS	2
blue.GO:0031134	GO:0031134	sister chromatid biorientation	2/654	2/16119	0.00164377	0.023812	0.0202573	CHAMP1/RB1	2
blue.GO:0071475	GO:0071475	cellular hyperosmotic salinity response	2/654	2/16119	0.00164377	0.023812	0.0202573	XRCC5/XRCC6	2
blue.GO:0075732	GO:0075732	viral penetration into host nucleus	2/654	2/16119	0.00164377	0.023812	0.0202573	NUP153/KPNA3	2
blue.GO:1901838	GO:1901838	positive regulation of transcription of nuclear large rRNA transcript from RNA polymerase I promoter	2/654	2/16119	0.00164377	0.023812	0.0202573	NOL11/NCL	2
blue.GO:1902594	GO:1902594	multi-organism nuclear import	2/654	2/16119	0.00164377	0.023812	0.0202573	NUP153/KPNA3	2
blue.GO:2000812	GO:2000812	regulation of barbed-end actin filament capping	2/654	2/16119	0.00164377	0.023812	0.0202573	LRRC16A/MTPN	2
blue.GO:0007006	GO:0007006	mitochondrial membrane organization	10/654	82/16119	0.00173352	0.0250132	0.0212793	PPP3R1/YWHAZ/HSPA4/OPA1/YWHAE/LETM1/YWHAG/TFDP1/TOMM22/YWHAQ	10
blue.GO:0016072	GO:0016072	rRNA metabolic process	13/654	126/16119	0.00182125	0.026176	0.0222685	NOL6/NOL11/TFB2M/PA2G4/NOP14/PES1/RRP1B/WBP11/CIRH1A/UTP18/NOLC1/EXOSC10/GAR1	13
blue.GO:0006368	GO:0006368	transcription elongation from RNA polymerase II promoter	10/654	83/16119	0.00190106	0.0272163	0.0231535	EZH2/SUPT16H/TCEB1/POLR2C/SSRP1/NCBP1/POLR2B/POLR2A/TCEA1/POLR2K	10
blue.GO:0006607	GO:0006607	NLS-bearing protein import into nucleus	4/654	14/16119	0.0019409	0.0276741	0.0235429	KPNA2/KPNA3/KPNB1/IPO5	4
blue.GO:0006479	GO:0006479	protein methylation	13/654	127/16119	0.00195568	0.0276741	0.0235429	MYB/SUZ12/PCMT1/ETF1/EZH2/KDM1A/PRMT5/SNW1/CTCF/RAB6A/DNMT1/ICMT/GSPT1	13
blue.GO:0008213	GO:0008213	protein alkylation	13/654	127/16119	0.00195568	0.0276741	0.0235429	MYB/SUZ12/PCMT1/ETF1/EZH2/KDM1A/PRMT5/SNW1/CTCF/RAB6A/DNMT1/ICMT/GSPT1	13
blue.GO:0032259	GO:0032259	methylation	23/654	293/16119	0.00198553	0.0279883	0.0238102	MYB/SUZ12/TFB2M/NSUN2/PCMT1/ETF1/EZH2/KDM1A/MIS18A/GART/TYMS/PRMT5/KDM1B/MTA2/SNW1/TRMT10C/MAT2A/CTCF/RAB6A/DNMT1/ICMT/GSPT1/TGS1	23
blue.GO:0044773	GO:0044773	mitotic DNA damage checkpoint	11/654	98/16119	0.00205086	0.0287984	0.0244995	TRIAP1/CDKN1B/PRKDC/PSME4/CCNA2/RPA2/PSMD5/NBN/CDK1/CDK2/PSMD7	11
blue.GO:0009452	GO:0009452	7-methylguanosine RNA capping	6/654	34/16119	0.00221966	0.0303547	0.0258234	POLR2C/NCBP1/POLR2B/POLR2A/POLR2K/TGS1	6
blue.GO:0033260	GO:0033260	nuclear cell cycle DNA replication	6/654	34/16119	0.00221966	0.0303547	0.0258234	RFC3/FEN1/RPA2/SLBP/RPA1/CDT1	6
blue.GO:0036260	GO:0036260	RNA capping	6/654	34/16119	0.00221966	0.0303547	0.0258234	POLR2C/NCBP1/POLR2B/POLR2A/POLR2K/TGS1	6
blue.GO:0044766	GO:0044766	multi-organism transport	6/654	34/16119	0.00221966	0.0303547	0.0258234	XPO1/RAN/DERL1/NUP153/KPNA3/KPNB1	6
blue.GO:0046794	GO:0046794	transport of virus	6/654	34/16119	0.00221966	0.0303547	0.0258234	XPO1/RAN/DERL1/NUP153/KPNA3/KPNB1	6
blue.GO:0075733	GO:0075733	intracellular transport of virus	6/654	34/16119	0.00221966	0.0303547	0.0258234	XPO1/RAN/DERL1/NUP153/KPNA3/KPNB1	6
blue.GO:1902583	GO:1902583	multi-organism intracellular transport	6/654	34/16119	0.00221966	0.0303547	0.0258234	XPO1/RAN/DERL1/NUP153/KPNA3/KPNB1	6
blue.GO:0008334	GO:0008334	histone mRNA metabolic process	5/654	24/16119	0.00242141	0.0329815	0.028058	SSB/SLBP/CPSF3/NCBP1/EXOSC10	5
blue.GO:0031396	GO:0031396	regulation of protein ubiquitination	18/654	211/16119	0.00243044	0.0329815	0.028058	CDC16/UBE2N/FANCI/PLK1/CDC20/BUB1B/PSME4/NDFIP2/MAD2L1/GTPBP4/PSMD5/CUL1/BUB3/CDK1/CCNB1/UBQLN1/CDK2/PSMD7	18
blue.GO:0006406	GO:0006406	mRNA export from nucleus	9/654	72/16119	0.00244774	0.0329815	0.028058	SMG7/SRSF1/GLE1/POLDIP3/SLBP/SRSF3/SRSF7/CPSF3/NCBP1	9
blue.GO:0051437	GO:0051437	positive regulation of ubiquitin-protein ligase activity involved in mitotic cell cycle	9/654	72/16119	0.00244774	0.0329815	0.028058	CDC16/PLK1/CDC20/PSME4/PSMD5/CUL1/CDK1/CCNB1/PSMD7	9
blue.GO:0006356	GO:0006356	regulation of transcription from RNA polymerase I promoter	4/654	15/16119	0.00256246	0.0344008	0.0292655	NOL11/NCL/TFAM/POLR2K	4
blue.GO:0009262	GO:0009262	deoxyribonucleotide metabolic process	6/654	35/16119	0.00258853	0.0346239	0.0294553	DUT/RRM2/NUDT15/TYMS/AK2/RRM1	6
blue.GO:0006513	GO:0006513	protein monoubiquitination	7/654	47/16119	0.00268255	0.0357511	0.0304142	UBE2T/UBE2R2/UBE2D3/KLHL12/DDB1/CUL1/WAC	7
blue.GO:0051443	GO:0051443	positive regulation of ubiquitin-protein transferase activity	10/654	87/16119	0.0027066	0.0359409	0.0305757	CDC16/UBE2N/PLK1/CDC20/PSME4/PSMD5/CUL1/CDK1/CCNB1/PSMD7	10
blue.GO:0051784	GO:0051784	negative regulation of nuclear division	8/654	60/16119	0.00279353	0.0369613	0.0314437	CDC16/BUB1/CENPF/PLK1/CDC20/BUB1B/MAD2L1/BUB3	8
blue.GO:0000079	GO:0000079	regulation of cyclin-dependent protein serine/threonine kinase activity	10/654	88/16119	0.00294548	0.0388317	0.0330349	CDKN3/CDKN1B/PLK1/CCNB2/CCNA2/BCCIP/GTPBP4/CCNB1/CKS2/CCNC	10
blue.GO:0010639	GO:0010639	negative regulation of organelle organization	19/654	232/16119	0.0029602	0.0388858	0.033081	CDC16/BUB1/TRIAP1/CENPF/PLK1/LRRC16A/CDC20/NEK2/BUB1B/MAD2L1/NPM1/CKAP2/KDM1A/OPA1/BUB3/MTPN/CCNB1/EPS8/DNMT1	19
blue.GO:0006457	GO:0006457	protein folding	18/654	215/16119	0.00297729	0.0389706	0.0331531	UGGT1/HSP90B1/CANX/PPIL1/CCT5/ST13/PPID/PSMD5/HSPD1/CCT6A/FKBP3/PTGES3/CCT8/HSPA9/TMX1/AARS/CCT4/TRAP1	18
blue.GO:0044774	GO:0044774	mitotic DNA integrity checkpoint	11/654	103/16119	0.00304444	0.0397077	0.0337802	TRIAP1/CDKN1B/PRKDC/PSME4/CCNA2/RPA2/PSMD5/NBN/CDK1/CDK2/PSMD7	11
blue.GO:0006367	GO:0006367	transcription initiation from RNA polymerase II promoter	17/654	199/16119	0.00311971	0.0405452	0.0344927	THRAP3/MED14/UBE2D3/CAND1/HMGB1/NR0B2/TFDP1/MED30/SNW1/POLR2C/MED4/MYC/POLR2B/HDAC1/POLR2A/CCNC/POLR2K	17
blue.GO:0007623	GO:0007623	circadian rhythm	14/654	150/16119	0.00317465	0.0406582	0.0345888	PRKDC/NONO/TIMELESS/EZH2/DHX9/SFPQ/TYMS/PRMT5/ARNTL2/PPP1CC/CCAR2/HDAC1/PSPC1/HNRNPD	14
blue.GO:0006390	GO:0006390	transcription from mitochondrial promoter	3/654	8/16119	0.00319497	0.0406582	0.0345888	TFB2M/POLRMT/TFAM	3
blue.GO:0032875	GO:0032875	regulation of DNA endoreduplication	3/654	8/16119	0.00319497	0.0406582	0.0345888	STAG2/SMC3/SMC1A	3
blue.GO:0045842	GO:0045842	positive regulation of mitotic metaphase/anaphase transition	3/654	8/16119	0.00319497	0.0406582	0.0345888	DLGAP5/PLK1/RB1	3
blue.GO:0071166	GO:0071166	ribonucleoprotein complex localization	3/654	8/16119	0.00319497	0.0406582	0.0345888	XPO1/RAN/TGS1	3
blue.GO:1902101	GO:1902101	positive regulation of metaphase/anaphase transition of cell cycle	3/654	8/16119	0.00319497	0.0406582	0.0345888	DLGAP5/PLK1/RB1	3
blue.GO:0072594	GO:0072594	establishment of protein localization to organelle	32/654	472/16119	0.00323862	0.0410711	0.0349401	KPNA2/PPP3R1/YWHAZ/TNPO1/TOMM20/RAN/HSPA4/TNPO3/RBM22/TACC3/SPCS3/IPO7/YWHAE/RPL30/YWHAG/TFDP1/SEC11C/AP3M1/NUP205/KPNA3/CDK1/TOMM70A/TOMM22/KPNB1/HSPA9/RAB6A/ECT2/YWHAQ/NUP98/SRP72/SSR1/IPO5	32
blue.GO:0031442	GO:0031442	positive regulation of mRNA 3'-end processing	4/654	16/16119	0.00330805	0.0418069	0.0355661	PABPC1/CNOT1/CCNB1/NCBP1	4
blue.GO:0016570	GO:0016570	histone modification	26/654	360/16119	0.00332809	0.0419157	0.0356586	UBE2N/MYB/SUZ12/TCF3/DDB1/EZH2/BAZ1B/KDM5C/KDM1A/SFPQ/PRMT5/WBP2/KDM1B/SAP130/MTA2/KDM4A/RBM14/NAA50/SNW1/WAC/CDK1/CCNB1/CTCF/HDAC1/DNMT1/CDK2	26
blue.GO:0030521	GO:0030521	androgen receptor signaling pathway	8/654	62/16119	0.00343957	0.0431713	0.0367268	RNF6/THRAP3/MED14/RAN/MED30/RB1/MED4/HDAC1	8
blue.GO:0000083	GO:0000083	regulation of transcription involved in G1/S transition of mitotic cell cycle	5/654	26/16119	0.00350487	0.0436916	0.0371694	RRM2/TYMS/RB1/CDK1/CDT1	5
blue.GO:0006378	GO:0006378	mRNA polyadenylation	5/654	26/16119	0.00350487	0.0436916	0.0371694	CSTF2/GRSF1/PABPC1/NUDT21/CPSF3	5
blue.GO:0051188	GO:0051188	cofactor biosynthetic process	13/654	136/16119	0.00357445	0.044408	0.0377789	FASN/PDP1/SLC25A38/SUCLA2/HSD17B12/DLD/ATIC/GART/MTHFD1/NIF3L1/MAT2A/DLAT/MTHFD2	13
blue.GO:0009127	GO:0009127	purine nucleoside monophosphate biosynthetic process	8/654	63/16119	0.00380317	0.0469314	0.0399255	IMPDH1/PRPS2/ADSS/ATIC/GART/AK2/PAICS/ATP5B	8
blue.GO:0009168	GO:0009168	purine ribonucleoside monophosphate biosynthetic process	8/654	63/16119	0.00380317	0.0469314	0.0399255	IMPDH1/PRPS2/ADSS/ATIC/GART/AK2/PAICS/ATP5B	8
blue.GO:0044783	GO:0044783	G1 DNA damage checkpoint	9/654	77/16119	0.00388057	0.0477258	0.0406013	TRIAP1/CDKN1B/PRKDC/PSME4/RPA2/PSMD5/WAC/CDK2/PSMD7	9
blue.GO:0008156	GO:0008156	negative regulation of DNA replication	6/654	38/16119	0.00397261	0.0486943	0.0414253	STAG2/GTPBP4/SMC3/SMC1A/GMNN/PDS5A	6
blue.GO:0051351	GO:0051351	positive regulation of ligase activity	10/654	92/16119	0.00407429	0.0497743	0.0423441	CDC16/UBE2N/PLK1/CDC20/PSME4/PSMD5/CUL1/CDK1/CCNB1/PSMD7	10
blue.GO:0032507	GO:0032507	maintenance of protein location in cell	11/654	107/16119	0.00409094	0.0498116	0.0423758	SPAG5/CHAMP1/NEK2/RACGAP1/TACC3/RCC2/RB1/FOPNL/BUB3/CCNB1/ECT2	11
brown.GO:0043254	GO:0043254	regulation of protein complex assembly	20/356	247/16119	6.24074e-07	0.00217864	0.00184135	ARFGEF1/SH3GLB1/NCKAP1/LMO4/TPR/PFN1/BRK1/SPTBN1/CAPZB/ARL2/TP53/CDC42EP5/HAX1/ARPC4/AHR/CDC42EP2/SEC24B/VDAC2/PYCARD/DDX3X	20
brown.GO:0032535	GO:0032535	regulation of cellular component size	18/356	227/16119	3.07517e-06	0.00403571	0.0034109	ARFGEF1/NCKAP1/BMPR2/ARHGAP5/RB1CC1/PFN1/BRK1/SPTBN1/CAPZB/PAFAH1B1/CDC42EP5/HAX1/ARPC4/SH3BGRL3/TNFRSF12A/CDC42EP2/PYCARD/CFL1	18
brown.GO:0008064	GO:0008064	regulation of actin polymerization or depolymerization	13/356	127/16119	4.70777e-06	0.00403571	0.0034109	ARFGEF1/NCKAP1/PFN1/BRK1/SPTBN1/CAPZB/CDC42EP5/HAX1/ARPC4/SH3BGRL3/CDC42EP2/PYCARD/CFL1	13
brown.GO:0030832	GO:0030832	regulation of actin filament length	13/356	128/16119	5.13707e-06	0.00403571	0.0034109	ARFGEF1/NCKAP1/PFN1/BRK1/SPTBN1/CAPZB/CDC42EP5/HAX1/ARPC4/SH3BGRL3/CDC42EP2/PYCARD/CFL1	13
brown.GO:0072594	GO:0072594	establishment of protein localization to organelle	27/356	472/16119	6.60327e-06	0.00403571	0.0034109	FAM89B/SH3GLB1/AIP/TPR/UBR5/TRAM1/UBA52/RPL41/GOLGA4/RPL19/TP53/G3BP2/SSR4/BAD/EMD/RANBP2/TIMM13/SSR2/KPNA6/TSPO/TIMM17B/HAX1/MAPK1/KPNA4/TIMM10B/CFL1/PPP3CA	27
brown.GO:0032271	GO:0032271	regulation of protein polymerization	13/356	133/16119	7.84592e-06	0.00403571	0.0034109	ARFGEF1/NCKAP1/PFN1/BRK1/SPTBN1/CAPZB/ARL2/CDC42EP5/HAX1/ARPC4/CDC42EP2/VDAC2/PYCARD	13
brown.GO:0010638	GO:0010638	positive regulation of organelle organization	21/356	317/16119	8.09222e-06	0.00403571	0.0034109	SH3GLB1/ROCK2/NCKAP1/TNKS2/MAPK3/TPR/PFN1/BRK1/ARL2/TP53/EIF4G3/BAD/CDC42EP5/HRAS/HAX1/ARPC4/LMAN1/SMC5/CDC42EP2/PYCARD/CFL1	21
brown.GO:0032956	GO:0032956	regulation of actin cytoskeleton organization	17/356	230/16119	1.46322e-05	0.00638512	0.00539658	ARFGEF1/ROCK2/NCKAP1/PFN1/BRK1/SPTBN1/CAPZB/CDC42EP5/HRAS/HAX1/ARPC4/SH3BGRL3/CDC42EP2/ROCK1/PHPT1/PYCARD/CFL1	17
brown.GO:0008154	GO:0008154	actin polymerization or depolymerization	13/356	143/16119	1.72532e-05	0.00669232	0.00565622	ARFGEF1/PFN1/SPTBN1/CAPZB/CDC42EP5/MSRB1/HAX1/ARPC4/SH3BGRL3/CDC42EP2/MSRB2/PYCARD/CFL1	13
brown.GO:0051493	GO:0051493	regulation of cytoskeleton organization	21/356	338/16119	2.1312e-05	0.00744001	0.00628815	ARFGEF1/ROCK2/NCKAP1/MAPK3/TPR/PFN1/BRK1/SPTBN1/CAPZB/ARL2/CDC42EP5/HRAS/HAX1/ARPC4/SH3BGRL3/MAPK1/CDC42EP2/ROCK1/PHPT1/PYCARD/CFL1	21
brown.GO:0016197	GO:0016197	endosomal transport	15/356	193/16119	2.59237e-05	0.00788797	0.00666676	SORT1/SNAPIN/MAPK3/PICALM/CD63/UBA52/UBB/RILP/STX10/MAP2K2/RAB11B/TRAK1/CHMP2A/MAPK1/RAB5B	15
brown.GO:0007015	GO:0007015	actin filament organization	18/356	266/16119	2.71142e-05	0.00788797	0.00666676	ARFGEF1/ROCK2/FAT1/NCKAP1/PFN1/BRK1/SPTBN1/CAPZB/CDC42EP5/MSRB1/HAX1/ARPC4/SH3BGRL3/CDC42EP2/ROCK1/MSRB2/PYCARD/CFL1	18
brown.GO:0030833	GO:0030833	regulation of actin filament polymerization	11/356	110/16119	3.16427e-05	0.00849727	0.00718173	ARFGEF1/NCKAP1/PFN1/BRK1/SPTBN1/CAPZB/CDC42EP5/HAX1/ARPC4/CDC42EP2/PYCARD	11
brown.GO:0090170	GO:0090170	regulation of Golgi inheritance	3/356	4/16119	4.20353e-05	0.0104818	0.00885902	MAPK3/MAP2K2/MAPK1	3
brown.GO:0030041	GO:0030041	actin filament polymerization	11/356	115/16119	4.78751e-05	0.0111421	0.00941711	ARFGEF1/PFN1/SPTBN1/CAPZB/CDC42EP5/MSRB1/HAX1/ARPC4/CDC42EP2/MSRB2/PYCARD	11
brown.GO:0044087	GO:0044087	regulation of cellular component biogenesis	25/356	474/16119	5.58493e-05	0.0121856	0.010299	ARFGEF1/SH3GLB1/ROCK2/NCKAP1/LMO4/TPR/PFN1/BRK1/SPTBN1/CAPZB/ARL2/TP53/CDC42EP5/PRKAA1/HRAS/HAX1/ARPC4/AHR/PRKCA/CDC42EP2/ROCK1/SEC24B/VDAC2/PYCARD/DDX3X	25
brown.GO:0051258	GO:0051258	protein polymerization	14/356	186/16119	6.81028e-05	0.0139851	0.01182	ARFGEF1/PFN1/SPTBN1/CAPZB/ARL2/CDC42EP5/MSRB1/HAX1/ARPC4/RANBP9/CDC42EP2/VDAC2/MSRB2/PYCARD	14
brown.GO:0038127	GO:0038127	ERBB signaling pathway	16/356	236/16119	7.38247e-05	0.0143179	0.0121012	RBPJ/PTPN11/MAPK3/FOXO3/ERBB2IP/UBA52/UBB/SOS1/MAP2K2/BAD/PRKAR1A/HRAS/PIK3C2A/MAPK1/PRKCA/IQGAP1	16
brown.GO:0030036	GO:0030036	actin cytoskeleton organization	25/356	484/16119	7.80275e-05	0.0143365	0.012117	ARFGEF1/PFDN1/ROCK2/FAT1/NCKAP1/PFN1/FMNL2/BRK1/SPTBN1/CAPZB/PAFAH1B1/CDC42EP5/PRKAR1A/HRAS/CDC42BPA/MSRB1/HAX1/ARPC4/SH3BGRL3/CDC42EP2/ROCK1/PHPT1/MSRB2/PYCARD/CFL1	25
brown.GO:0038093	GO:0038093	Fc receptor signaling pathway	16/356	240/16119	8.99979e-05	0.0157091	0.0132771	NCKAP1/PTPN11/MAPK3/FOXO3/BRK1/UBA52/UBB/SOS1/TAB2/MAP2K2/BAD/HRAS/ARPC4/MAPK1/CFL1/PPP3CA	16
brown.GO:1903358	GO:1903358	regulation of Golgi organization	3/356	5/16119	0.000103364	0.0168516	0.0142426	MAPK3/MAP2K2/MAPK1	3
brown.GO:0072655	GO:0072655	establishment of protein localization to mitochondrion	9/356	85/16119	0.000106197	0.0168516	0.0142426	SH3GLB1/AIP/TP53/BAD/TIMM13/TSPO/TIMM17B/HAX1/TIMM10B	9
brown.GO:0006839	GO:0006839	mitochondrial transport	13/356	171/16119	0.00011142	0.0169116	0.0142934	SH3GLB1/AIP/SMDT1/ALKBH7/ATP5D/TP53/BAD/TIMM13/CPT1A/TSPO/TIMM17B/HAX1/TIMM10B	13
brown.GO:0032970	GO:0032970	regulation of actin filament-based process	17/356	273/16119	0.000125918	0.0183159	0.0154802	ARFGEF1/ROCK2/NCKAP1/PFN1/BRK1/SPTBN1/CAPZB/CDC42EP5/HRAS/HAX1/ARPC4/SH3BGRL3/CDC42EP2/ROCK1/PHPT1/PYCARD/CFL1	17
brown.GO:0032386	GO:0032386	regulation of intracellular transport	21/356	387/16119	0.000148556	0.0202496	0.0171145	FAM89B/OAZ1/MGEA5/SH3GLB1/SNAPIN/PTPN11/MAPK3/TPR/TMEM30A/UBR5/TP53/G3BP2/MAP2K2/BAD/PCM1/EMD/RAB11B/SETD2/HAX1/MAPK1/SEC24B	21
brown.GO:0070585	GO:0070585	protein localization to mitochondrion	9/356	89/16119	0.000151757	0.0202496	0.0171145	SH3GLB1/AIP/TP53/BAD/TIMM13/TSPO/TIMM17B/HAX1/TIMM10B	9
brown.GO:0030522	GO:0030522	intracellular receptor signaling pathway	17/356	278/16119	0.000156614	0.0202496	0.0171145	MED13/TAF7/UBR5/NCOA4/UBA52/KMT2E/UBB/TAB2/XIAP/DDX17/EP300/TADA3/NR1D2/AHR/DDX5/DHRS3/PYCARD	17
brown.GO:0007173	GO:0007173	epidermal growth factor receptor signaling pathway	15/356	230/16119	0.0001891	0.0235767	0.0199266	PTPN11/MAPK3/FOXO3/ERBB2IP/UBA52/UBB/SOS1/MAP2K2/BAD/PRKAR1A/HRAS/PIK3C2A/MAPK1/PRKCA/IQGAP1	15
brown.GO:0007265	GO:0007265	Ras protein signal transduction	15/356	233/16119	0.000217729	0.0262101	0.0221523	ARFGEF1/NCKAP1/MAPK3/ARHGAP5/BRK1/ARHGDIA/SOS1/TP53/G3BP2/MAP2K2/CDC42EP5/HRAS/MAPK1/ROCK1/CFL1	15
brown.GO:0008543	GO:0008543	fibroblast growth factor receptor signaling pathway	13/356	185/16119	0.000243776	0.0278394	0.0235293	PTPN11/MAPK3/FOXO3/UBA52/UBB/SOS1/MAP2K2/BAD/PRKAR1A/HRAS/MAPK1/FIBP/PRKCA	13
brown.GO:0046323	GO:0046323	glucose import	7/356	57/16119	0.000247213	0.0278394	0.0235293	ARPP19/MGEA5/SORT1/PTPN11/LMBRD1/PRKAA1/PRKCA	7
brown.GO:0035666	GO:0035666	TRIF-dependent toll-like receptor signaling pathway	8/356	76/16119	0.000266808	0.029107	0.0246007	MAPK3/UBE2D2/UBA52/UBB/TAB2/MAP2K2/MAPK1/RPS6KA3	8
brown.GO:0051495	GO:0051495	positive regulation of cytoskeleton organization	11/356	140/16119	0.000279642	0.0295827	0.0250027	NCKAP1/PFN1/BRK1/ARL2/CDC42EP5/HRAS/HAX1/ARPC4/CDC42EP2/PYCARD/CFL1	11
brown.GO:0008625	GO:0008625	extrinsic apoptotic signaling pathway via death domain receptors	8/356	77/16119	0.00029211	0.0299929	0.0253494	GABARAP/SORT1/ROCK2/TRADD/BAD/DAPK1/SKIL/DDX3X	8
brown.GO:0090066	GO:0090066	regulation of anatomical structure size	19/356	351/16119	0.000314402	0.0305476	0.0258183	ARFGEF1/NCKAP1/BMPR2/ARHGAP5/RB1CC1/PFN1/BRK1/SPTBN1/CAPZB/PAFAH1B1/CDC42EP5/PIK3C2A/HAX1/ARPC4/SH3BGRL3/TNFRSF12A/CDC42EP2/PYCARD/CFL1	19
brown.GO:0032273	GO:0032273	positive regulation of protein polymerization	8/356	78/16119	0.000319339	0.0305476	0.0258183	NCKAP1/PFN1/BRK1/ARL2/CDC42EP5/ARPC4/CDC42EP2/PYCARD	8
brown.GO:0007030	GO:0007030	Golgi organization	7/356	60/16119	0.000341258	0.0305476	0.0258183	ARFGEF1/MAPK3/MAP2K2/GOLGB1/MAPK1/LMAN1/ARHGAP21	7
brown.GO:0002756	GO:0002756	MyD88-independent toll-like receptor signaling pathway	8/356	79/16119	0.000348604	0.0305476	0.0258183	MAPK3/UBE2D2/UBA52/UBB/TAB2/MAP2K2/MAPK1/RPS6KA3	8
brown.GO:0048308	GO:0048308	organelle inheritance	3/356	7/16119	0.000350016	0.0305476	0.0258183	MAPK3/MAP2K2/MAPK1	3
brown.GO:0048313	GO:0048313	Golgi inheritance	3/356	7/16119	0.000350016	0.0305476	0.0258183	MAPK3/MAP2K2/MAPK1	3
brown.GO:0043623	GO:0043623	cellular protein complex assembly	20/356	386/16119	0.000387571	0.03202	0.0270627	ARFGEF1/FCHO2/PICALM/PFN1/CYBA/SPTBN1/CAPZB/ARL2/CDC42EP5/PIK3C2A/MSRB1/HAX1/ARPC4/NDUFAF3/RANBP9/CDC42EP2/SEC24B/VDAC2/MSRB2/PYCARD	20
brown.GO:0090311	GO:0090311	regulation of protein deacetylation	5/356	29/16119	0.000392085	0.03202	0.0270627	SPRED2/TP53/EP300/TADA3/BRMS1	5
brown.GO:0097191	GO:0097191	extrinsic apoptotic signaling pathway	14/356	220/16119	0.000394403	0.03202	0.0270627	GABARAP/SORT1/ROCK2/TRADD/FOXO3/RB1CC1/PPP1CA/BAD/GSTP1/DAPK1/SKIL/TNFRSF12A/PYCARD/DDX3X	14
brown.GO:0008286	GO:0008286	insulin receptor signaling pathway	12/356	171/16119	0.000424489	0.0336793	0.0284651	PTPN11/MAPK3/LMBRD1/SOS1/MAP2K2/PRKAA1/HRAS/PIK3C2A/CAB39/MAPK1/PRKCA/EIF4EBP2	12
brown.GO:0000189	GO:0000189	MAPK import into nucleus	2/356	2/16119	0.00048644	0.035778	0.0302389	TPR/MAPK1	2
brown.GO:0006679	GO:0006679	glucosylceramide biosynthetic process	2/356	2/16119	0.00048644	0.035778	0.0302389	UGCG/PRKAA1	2
brown.GO:0045175	GO:0045175	basal protein localization	2/356	2/16119	0.00048644	0.035778	0.0302389	NCKAP1/ERBB2IP	2
brown.GO:0043620	GO:0043620	regulation of DNA-templated transcription in response to stress	6/356	46/16119	0.000494431	0.035778	0.0302389	UBE2D2/UBA52/UBB/EP300/RPS6KA3/ATF4	6
brown.GO:0007623	GO:0007623	circadian rhythm	11/356	150/16119	0.000505084	0.035778	0.0302389	ROCK2/PPP1CA/SETX/JUND/PRKAA1/EP300/NR1D2/ATF4/AHR/DDX5/BHLHE41	11
brown.GO:0034138	GO:0034138	toll-like receptor 3 signaling pathway	8/356	84/16119	0.000529549	0.035778	0.0302389	MAPK3/UBE2D2/UBA52/UBB/TAB2/MAP2K2/MAPK1/RPS6KA3	8
brown.GO:0031334	GO:0031334	positive regulation of protein complex assembly	10/356	128/16119	0.000549455	0.035778	0.0302389	SH3GLB1/NCKAP1/PFN1/BRK1/ARL2/TP53/CDC42EP5/ARPC4/CDC42EP2/PYCARD	10
brown.GO:1902914	GO:1902914	regulation of protein polyubiquitination	3/356	8/16119	0.000550865	0.035778	0.0302389	UBR5/XIAP/TRIP12	3
brown.GO:0034146	GO:0034146	toll-like receptor 5 signaling pathway	7/356	65/16119	0.000559877	0.035778	0.0302389	MAPK3/UBA52/UBB/TAB2/MAP2K2/MAPK1/RPS6KA3	7
brown.GO:0034166	GO:0034166	toll-like receptor 10 signaling pathway	7/356	65/16119	0.000559877	0.035778	0.0302389	MAPK3/UBA52/UBB/TAB2/MAP2K2/MAPK1/RPS6KA3	7
brown.GO:0051403	GO:0051403	stress-activated MAPK cascade	14/356	228/16119	0.000563676	0.035778	0.0302389	MAPK3/RB1CC1/UBA52/UBB/TAB2/PAFAH1B1/MAP2K2/GSTP1/CDC42EP5/HRAS/MAPK1/RPS6KA3/NBR1/PYCARD	14
brown.GO:0030838	GO:0030838	positive regulation of actin filament polymerization	7/356	66/16119	0.000614629	0.0381332	0.0322294	NCKAP1/PFN1/BRK1/CDC42EP5/ARPC4/CDC42EP2/PYCARD	7
brown.GO:0044344	GO:0044344	cellular response to fibroblast growth factor stimulus	13/356	204/16119	0.000622627	0.0381332	0.0322294	PTPN11/MAPK3/FOXO3/UBA52/UBB/SOS1/MAP2K2/BAD/PRKAR1A/HRAS/MAPK1/FIBP/PRKCA	13
brown.GO:0031098	GO:0031098	stress-activated protein kinase signaling cascade	14/356	231/16119	0.000641391	0.0386051	0.0326283	MAPK3/RB1CC1/UBA52/UBB/TAB2/PAFAH1B1/MAP2K2/GSTP1/CDC42EP5/HRAS/MAPK1/RPS6KA3/NBR1/PYCARD	14
brown.GO:0071774	GO:0071774	response to fibroblast growth factor	13/356	207/16119	0.000713718	0.0422303	0.0356922	PTPN11/MAPK3/FOXO3/UBA52/UBB/SOS1/MAP2K2/BAD/PRKAR1A/HRAS/MAPK1/FIBP/PRKCA	13
brown.GO:0006446	GO:0006446	regulation of translational initiation	7/356	68/16119	0.000736853	0.0428726	0.0362351	TPR/EIF4A2/EIF3G/EIF4G3/EIF4EBP2/EIF4G2/DDX3X	7
brown.GO:0006417	GO:0006417	regulation of translation	15/356	262/16119	0.000749895	0.0429161	0.0362719	FOXO3/TPR/PUM1/EIF4A2/EIF3G/EIF4G3/WIBG/DAPK1/PUM2/MAPK1/RPS6KA3/MIF4GD/EIF4EBP2/EIF4G2/DDX3X	15
brown.GO:0038095	GO:0038095	Fc-epsilon receptor signaling pathway	12/356	184/16119	0.000815574	0.045815	0.0387219	PTPN11/MAPK3/FOXO3/UBA52/UBB/SOS1/TAB2/MAP2K2/BAD/HRAS/MAPK1/PPP3CA	12
brown.GO:0010827	GO:0010827	regulation of glucose transport	8/356	90/16119	0.000839919	0.045815	0.0387219	ARPP19/MGEA5/PTPN11/TPR/LMBRD1/RANBP2/PRKAA1/PRKCA	8
brown.GO:0014020	GO:0014020	primary neural tube formation	8/356	90/16119	0.000839919	0.045815	0.0387219	ROCK2/NCKAP1/LMO4/HECTD1/PFN1/SETD2/SEC24B/CFL1	8
brown.GO:0046324	GO:0046324	regulation of glucose import	6/356	51/16119	0.000866662	0.0463952	0.0392124	ARPP19/MGEA5/PTPN11/LMBRD1/PRKAA1/PRKCA	6
brown.GO:0033044	GO:0033044	regulation of chromosome organization	10/356	136/16119	0.000881778	0.0463952	0.0392124	TNKS2/TAF7/MAPK3/TPR/UBR5/WAPAL/TP53/TRIP12/TADA3/SMC5	10
brown.GO:0048193	GO:0048193	Golgi vesicle transport	13/356	212/16119	0.000890427	0.0463952	0.0392124	SORT1/PUM1/SCAMP1/USO1/STX10/SPTBN1/GOLGA4/TRAPPC1/RAB1B/LMAN1/SEC24A/FTH1/SEC24B	13
brown.GO:0038123	GO:0038123	toll-like receptor TLR1:TLR2 signaling pathway	7/356	71/16119	0.000955415	0.0483385	0.0408548	MAPK3/UBA52/UBB/TAB2/MAP2K2/MAPK1/RPS6KA3	7
brown.GO:0038124	GO:0038124	toll-like receptor TLR6:TLR2 signaling pathway	7/356	71/16119	0.000955415	0.0483385	0.0408548	MAPK3/UBA52/UBB/TAB2/MAP2K2/MAPK1/RPS6KA3	7
brown.GO:0031346	GO:0031346	positive regulation of cell projection organization	12/356	188/16119	0.000984005	0.0490737	0.0414762	NCKAP1/BMPR2/TMEM30A/PFN1/BRK1/ARHGDIA/PAFAH1B1/CDC42EP5/HRAS/SKIL/TNFRSF12A/CDC42EP2	12
cyan.GO:0002429	GO:0002429	immune response-activating cell surface receptor signaling pathway	17/112	230/16119	3.76944e-13	7.27503e-10	5.23358e-10	WIPF1/PTPRC/RFTN1/WAS/C5AR1/INPP5D/CD79A/LPXN/LCK/SYK/PTPN6/ARPC2/PTPRJ/ACTR3/CARD11/CSK/GRB2	17
cyan.GO:0002757	GO:0002757	immune response-activating signal transduction	20/112	374/16119	1.14783e-12	1.10766e-09	7.96837e-10	WIPF1/ITGB2/PTPRC/RFTN1/WAS/C5AR1/INPP5D/CD79A/PIK3AP1/LPXN/LCK/SYK/PTPN6/NFKB2/ARPC2/PTPRJ/ACTR3/CARD11/CSK/GRB2	20
cyan.GO:0002253	GO:0002253	activation of immune response	20/112	424/16119	1.13785e-11	7.32017e-09	5.26605e-09	WIPF1/ITGB2/PTPRC/RFTN1/WAS/C5AR1/INPP5D/CD79A/PIK3AP1/LPXN/LCK/SYK/PTPN6/NFKB2/ARPC2/PTPRJ/ACTR3/CARD11/CSK/GRB2	20
cyan.GO:0002764	GO:0002764	immune response-regulating signaling pathway	20/112	481/16119	1.09052e-10	5.26175e-08	3.78524e-08	WIPF1/ITGB2/PTPRC/RFTN1/WAS/C5AR1/INPP5D/CD79A/PIK3AP1/LPXN/LCK/SYK/PTPN6/NFKB2/ARPC2/PTPRJ/ACTR3/CARD11/CSK/GRB2	20
cyan.GO:0002768	GO:0002768	immune response-regulating cell surface receptor signaling pathway	17/112	350/16119	2.97412e-10	9.92616e-08	7.14077e-08	WIPF1/PTPRC/RFTN1/WAS/C5AR1/INPP5D/CD79A/LPXN/LCK/SYK/PTPN6/ARPC2/PTPRJ/ACTR3/CARD11/CSK/GRB2	17
cyan.GO:0050851	GO:0050851	antigen receptor-mediated signaling pathway	12/112	143/16119	3.08585e-10	9.92616e-08	7.14077e-08	PTPRC/RFTN1/WAS/INPP5D/CD79A/LPXN/LCK/SYK/PTPN6/PTPRJ/CARD11/CSK	12
cyan.GO:0045577	GO:0045577	regulation of B cell differentiation	6/112	20/16119	3.52014e-09	9.70554e-07	6.98206e-07	CD27/INPP5D/SYK/PTPN6/PRDM1/CARD11	6
cyan.GO:0030036	GO:0030036	actin cytoskeleton organization	18/112	484/16119	6.01832e-09	1.45192e-06	1.04449e-06	WIPF1/HCLS1/ARHGDIB/LCP1/PLEK/WAS/RHOG/CORO1A/RAC2/IQSEC1/CAP1/PTK2B/ARPC2/PTPN1/PPP1R9B/TWF2/ACTR3/GRB2	18
cyan.GO:0050853	GO:0050853	B cell receptor signaling pathway	7/112	39/16119	8.28376e-09	1.77641e-06	1.27793e-06	PTPRC/RFTN1/CD79A/LPXN/LCK/SYK/PTPN6	7
cyan.GO:0030168	GO:0030168	platelet activation	13/112	241/16119	1.23747e-08	2.29735e-06	1.65269e-06	PLEK/RHOG/RAC2/LCK/SYK/PTPN6/FERMT3/GNA13/CAP1/PTPN1/WDR1/CSK/GRB2	13
cyan.GO:0050864	GO:0050864	regulation of B cell activation	9/112	91/16119	1.32841e-08	2.29735e-06	1.65269e-06	FAS/PTPRC/SASH3/CD27/INPP5D/SYK/PTPN6/PRDM1/CARD11	9
cyan.GO:0042113	GO:0042113	B cell activation	12/112	200/16119	1.42841e-08	2.29735e-06	1.65269e-06	FAS/PTPRC/SASH3/CD27/INPP5D/CD79A/SYK/PTPN6/PRDM1/PTK2B/AKAP17A/CARD11	12
cyan.GO:0002521	GO:0002521	leukocyte differentiation	16/112	414/16119	2.6853e-08	3.98664e-06	2.86795e-06	FAS/HCLS1/PTPRC/SASH3/RASSF2/CD27/INPP5D/CD79A/LCK/SYK/PTPN6/PRDM1/RELB/PTK2B/CARD11/PARP1	16
cyan.GO:0050867	GO:0050867	positive regulation of cell activation	13/112	264/16119	3.6501e-08	5.03192e-06	3.61991e-06	PTPRC/SASH3/PLEK/CORO1A/CD27/INPP5D/LCK/SYK/PTPN6/PRDM1/CARD11/CSK/GRB2	13
cyan.GO:0007015	GO:0007015	actin filament organization	13/112	266/16119	3.9894e-08	5.13302e-06	3.69264e-06	WIPF1/HCLS1/LCP1/PLEK/WAS/CORO1A/RAC2/PTK2B/ARPC2/PPP1R9B/TWF2/ACTR3/GRB2	13
cyan.GO:0008154	GO:0008154	actin polymerization or depolymerization	10/112	143/16119	5.76202e-08	6.95044e-06	5.00007e-06	WIPF1/HCLS1/PLEK/WAS/CORO1A/PTK2B/ARPC2/TWF2/ACTR3/GRB2	10
cyan.GO:0030098	GO:0030098	lymphocyte differentiation	13/112	276/16119	6.15182e-08	6.98413e-06	5.0243e-06	FAS/PTPRC/SASH3/CD27/INPP5D/CD79A/LCK/SYK/PTPN6/PRDM1/RELB/PTK2B/CARD11	13
cyan.GO:0050852	GO:0050852	T cell receptor signaling pathway	9/112	111/16119	7.63123e-08	8.18238e-06	5.88631e-06	PTPRC/RFTN1/WAS/INPP5D/LCK/PTPN6/PTPRJ/CARD11/CSK	9
cyan.GO:0051251	GO:0051251	positive regulation of lymphocyte activation	12/112	236/16119	8.90992e-08	9.0506e-06	6.5109e-06	PTPRC/SASH3/CORO1A/CD27/INPP5D/LCK/SYK/PTPN6/PRDM1/CARD11/CSK/GRB2	12
cyan.GO:0050871	GO:0050871	positive regulation of B cell activation	7/112	57/16119	1.28484e-07	1.23987e-05	8.91948e-06	PTPRC/SASH3/CD27/INPP5D/SYK/PRDM1/CARD11	7
cyan.GO:0043254	GO:0043254	regulation of protein complex assembly	12/112	247/16119	1.46319e-07	1.34474e-05	9.67389e-06	FAS/HCLS1/PLEK/WAS/CORO1A/DNM1L/PTK2B/ARPC2/BIK/TWF2/ACTR3/GRB2	12
cyan.GO:0045619	GO:0045619	regulation of lymphocyte differentiation	9/112	123/16119	1.85449e-07	1.62689e-05	1.17037e-05	FAS/SASH3/CD27/INPP5D/LCK/SYK/PTPN6/PRDM1/CARD11	9
cyan.GO:0002696	GO:0002696	positive regulation of leukocyte activation	12/112	255/16119	2.06591e-07	1.73357e-05	1.24711e-05	PTPRC/SASH3/CORO1A/CD27/INPP5D/LCK/SYK/PTPN6/PRDM1/CARD11/CSK/GRB2	12
cyan.GO:1902105	GO:1902105	regulation of leukocyte differentiation	11/112	209/16119	2.23733e-07	1.79919e-05	1.29431e-05	FAS/HCLS1/SASH3/RASSF2/CD27/INPP5D/LCK/SYK/PTPN6/PRDM1/CARD11	11
cyan.GO:0008064	GO:0008064	regulation of actin polymerization or depolymerization	9/112	127/16119	2.44056e-07	1.8657e-05	1.34216e-05	HCLS1/PLEK/WAS/CORO1A/PTK2B/ARPC2/TWF2/ACTR3/GRB2	9
cyan.GO:0030832	GO:0030832	regulation of actin filament length	9/112	128/16119	2.61004e-07	1.8657e-05	1.34216e-05	HCLS1/PLEK/WAS/CORO1A/PTK2B/ARPC2/TWF2/ACTR3/GRB2	9
cyan.GO:0031334	GO:0031334	positive regulation of protein complex assembly	9/112	128/16119	2.61004e-07	1.8657e-05	1.34216e-05	FAS/PLEK/WAS/CORO1A/PTK2B/ARPC2/BIK/ACTR3/GRB2	9
cyan.GO:0030183	GO:0030183	B cell differentiation	8/112	101/16119	4.98943e-07	3.3218e-05	2.38967e-05	CD27/INPP5D/CD79A/SYK/PTPN6/PRDM1/PTK2B/CARD11	8
cyan.GO:0030155	GO:0030155	regulation of cell adhesion	13/112	331/16119	4.99131e-07	3.3218e-05	2.38967e-05	PTPRC/ARHGDIB/CYTIP/SIPA1/RAC2/PLEKHA2/LPXN/SYK/PTPN6/FERMT3/PTK2B/ARPC2/PTPRJ	13
cyan.GO:0051249	GO:0051249	regulation of lymphocyte activation	13/112	336/16119	5.91421e-07	3.80481e-05	2.73714e-05	FAS/PTPRC/SASH3/CORO1A/CD27/INPP5D/LCK/SYK/PTPN6/PRDM1/CARD11/CSK/GRB2	13
cyan.GO:0045579	GO:0045579	positive regulation of B cell differentiation	4/112	11/16119	7.02019e-07	4.37063e-05	3.14419e-05	CD27/INPP5D/SYK/PRDM1	4
cyan.GO:0030833	GO:0030833	regulation of actin filament polymerization	8/112	110/16119	9.60547e-07	5.70349e-05	4.10303e-05	HCLS1/WAS/CORO1A/PTK2B/ARPC2/TWF2/ACTR3/GRB2	8
cyan.GO:0050865	GO:0050865	regulation of cell activation	14/112	411/16119	9.75208e-07	5.70349e-05	4.10303e-05	FAS/PTPRC/SASH3/PLEK/CORO1A/CD27/INPP5D/LCK/SYK/PTPN6/PRDM1/CARD11/CSK/GRB2	14
cyan.GO:0030041	GO:0030041	actin filament polymerization	8/112	115/16119	1.34748e-06	7.64894e-05	5.50256e-05	HCLS1/WAS/CORO1A/PTK2B/ARPC2/TWF2/ACTR3/GRB2	8
cyan.GO:0002694	GO:0002694	regulation of leukocyte activation	13/112	381/16119	2.40386e-06	0.000132556	9.53592e-05	FAS/PTPRC/SASH3/CORO1A/CD27/INPP5D/LCK/SYK/PTPN6/PRDM1/CARD11/CSK/GRB2	13
cyan.GO:0050854	GO:0050854	regulation of antigen receptor-mediated signaling pathway	5/112	34/16119	3.50774e-06	0.000186257	0.000133991	PTPRC/LPXN/LCK/PTPN6/PTPRJ	5
cyan.GO:0042110	GO:0042110	T cell activation	13/112	395/16119	3.57073e-06	0.000186257	0.000133991	FAS/PTPRC/SASH3/LCP1/WAS/CORO1A/LCK/SYK/PTPN6/RELB/CARD11/CSK/GRB2	13
cyan.GO:0032271	GO:0032271	regulation of protein polymerization	8/112	133/16119	4.0253e-06	0.00020123	0.000144763	HCLS1/WAS/CORO1A/PTK2B/ARPC2/TWF2/ACTR3/GRB2	8
cyan.GO:0032535	GO:0032535	regulation of cellular component size	10/112	227/16119	4.06631e-06	0.00020123	0.000144763	HCLS1/PLEK/WAS/CORO1A/PTK2B/ARPC2/TWF2/ACTR3/ARHGAP4/GRB2	10
cyan.GO:0002431	GO:0002431	Fc receptor mediated stimulatory signaling pathway	7/112	95/16119	4.32374e-06	0.00020862	0.000150079	WIPF1/WAS/SYK/ARPC2/ACTR3/CSK/GRB2	7
cyan.GO:0044087	GO:0044087	regulation of cellular component biogenesis	14/112	474/16119	5.14686e-06	0.000242279	0.000174293	FAS/HCLS1/PLEK/WAS/RHOG/CORO1A/DNM1L/PTK2B/ARPC2/PTPRJ/BIK/TWF2/ACTR3/GRB2	14
cyan.GO:0050870	GO:0050870	positive regulation of T cell activation	9/112	185/16119	5.65849e-06	0.000259324	0.000186555	PTPRC/SASH3/CORO1A/LCK/SYK/PTPN6/CARD11/CSK/GRB2	9
cyan.GO:0051495	GO:0051495	positive regulation of cytoskeleton organization	8/112	140/16119	5.89265e-06	0.000259324	0.000186555	HCLS1/PLEK/WAS/CORO1A/PTK2B/ARPC2/ACTR3/GRB2	8
cyan.GO:0051258	GO:0051258	protein polymerization	9/112	186/16119	5.91204e-06	0.000259324	0.000186555	HCLS1/WAS/CORO1A/DNM1L/PTK2B/ARPC2/TWF2/ACTR3/GRB2	9
cyan.GO:0060338	GO:0060338	regulation of type I interferon-mediated signaling pathway	5/112	38/16119	6.18913e-06	0.000265445	0.000190958	JAK1/SOCS1/PTPN6/PTPN1/TYK2	5
cyan.GO:0030838	GO:0030838	positive regulation of actin filament polymerization	6/112	66/16119	6.3658e-06	0.000267087	0.000192139	WAS/CORO1A/PTK2B/ARPC2/ACTR3/GRB2	6
cyan.GO:0050900	GO:0050900	leukocyte migration	11/112	300/16119	7.65025e-06	0.000314149	0.000225995	ITGB2/MYO9B/C5AR1/CORO1A/RAC2/INPP5D/LCK/SYK/PTPN6/PTK2B/GRB2	11
cyan.GO:0033673	GO:0033673	negative regulation of kinase activity	9/112	198/16119	9.8023e-06	0.000394134	0.000283536	PTPRC/SOCS1/PTPN6/WNK1/PTPN1/PDCD4/PTPRJ/DUSP2/CSK	9
cyan.GO:0002250	GO:0002250	adaptive immune response	10/112	254/16119	1.09382e-05	0.000430833	0.000309936	FAS/PTPRC/SASH3/RFTN1/CD27/INPP5D/SYK/PTPN6/NFKB2/RELB	10
cyan.GO:0007266	GO:0007266	Rho protein signal transduction	6/112	74/16119	1.24076e-05	0.000460511	0.000331287	ARHGDIB/MYO9B/RHOG/GNA13/ARHGEF1/ARHGAP4	6
cyan.GO:0045621	GO:0045621	positive regulation of lymphocyte differentiation	6/112	74/16119	1.24076e-05	0.000460511	0.000331287	SASH3/CD27/INPP5D/LCK/SYK/PRDM1	6
cyan.GO:0046849	GO:0046849	bone remodeling	6/112	74/16119	1.24076e-05	0.000460511	0.000331287	RASSF2/RAC2/INPP5D/SYK/PTK2B/CSK	6
cyan.GO:1902107	GO:1902107	positive regulation of leukocyte differentiation	7/112	115/16119	1.5298e-05	0.000557078	0.000400756	HCLS1/SASH3/CD27/INPP5D/LCK/SYK/PRDM1	7
cyan.GO:0032273	GO:0032273	positive regulation of protein polymerization	6/112	78/16119	1.68203e-05	0.000601168	0.000432474	WAS/CORO1A/PTK2B/ARPC2/ACTR3/GRB2	6
cyan.GO:0042100	GO:0042100	B cell proliferation	6/112	79/16119	1.81006e-05	0.000635167	0.000456932	PTPRC/SASH3/INPP5D/CD79A/PRDM1/CARD11	6
cyan.GO:0002460	GO:0002460	adaptive immune response based on somatic recombination of immune receptors built from immunoglobulin superfamily domains	9/112	217/16119	2.03729e-05	0.00069352	0.000498911	FAS/PTPRC/SASH3/RFTN1/CD27/INPP5D/PTPN6/NFKB2/RELB	9
cyan.GO:0043547	GO:0043547	positive regulation of GTPase activity	13/112	465/16119	2.04822e-05	0.00069352	0.000498911	RGS1/ARHGDIB/SMAP2/MYO9B/RHOG/SIPA1/RGS19/IQSEC1/ARHGEF1/PTK2B/GMIP/SBF1/ARHGAP4	13
cyan.GO:0060334	GO:0060334	regulation of interferon-gamma-mediated signaling pathway	4/112	24/16119	2.10825e-05	0.000701539	0.00050468	JAK1/SOCS1/PTPN6/PTPN1	4
cyan.GO:0045453	GO:0045453	bone resorption	5/112	50/16119	2.44491e-05	0.000789739	0.00056813	RAC2/INPP5D/SYK/PTK2B/CSK	5
cyan.GO:0060330	GO:0060330	regulation of response to interferon-gamma	4/112	25/16119	2.49642e-05	0.000789739	0.00056813	JAK1/SOCS1/PTPN6/PTPN1	4
cyan.GO:0051056	GO:0051056	regulation of small GTPase mediated signal transduction	13/112	474/16119	2.50273e-05	0.000789739	0.00056813	ARHGDIB/SMAP2/MYO9B/RHOG/SIPA1/RAC2/IQSEC1/ARHGEF1/PTK2B/SHOC2/GMIP/SBF1/ARHGAP4	13
cyan.GO:0050670	GO:0050670	regulation of lymphocyte proliferation	8/112	171/16119	2.53699e-05	0.000789739	0.00056813	PTPRC/SASH3/CORO1A/INPP5D/SYK/PTPN6/PRDM1/CARD11	8
cyan.GO:0032944	GO:0032944	regulation of mononuclear cell proliferation	8/112	172/16119	2.64553e-05	0.000810457	0.000583034	PTPRC/SASH3/CORO1A/INPP5D/SYK/PTPN6/PRDM1/CARD11	8
cyan.GO:0032956	GO:0032956	regulation of actin cytoskeleton organization	9/112	230/16119	3.22202e-05	0.000938221	0.000674946	HCLS1/PLEK/WAS/CORO1A/PTK2B/ARPC2/TWF2/ACTR3/GRB2	9
cyan.GO:0046651	GO:0046651	lymphocyte proliferation	9/112	230/16119	3.22202e-05	0.000938221	0.000674946	PTPRC/SASH3/CORO1A/INPP5D/CD79A/SYK/PTPN6/PRDM1/CARD11	9
cyan.GO:0070663	GO:0070663	regulation of leukocyte proliferation	8/112	177/16119	3.24849e-05	0.000938221	0.000674946	PTPRC/SASH3/CORO1A/INPP5D/SYK/PTPN6/PRDM1/CARD11	8
cyan.GO:0030888	GO:0030888	regulation of B cell proliferation	5/112	53/16119	3.25704e-05	0.000938221	0.000674946	PTPRC/SASH3/INPP5D/PRDM1/CARD11	5
cyan.GO:0032943	GO:0032943	mononuclear cell proliferation	9/112	232/16119	3.44801e-05	0.000978625	0.000704012	PTPRC/SASH3/CORO1A/INPP5D/CD79A/SYK/PTPN6/PRDM1/CARD11	9
cyan.GO:0007265	GO:0007265	Ras protein signal transduction	9/112	233/16119	3.56595e-05	0.000997432	0.000717542	ARHGDIB/MYO9B/RHOG/IQSEC1/GNA13/ARHGEF1/SHOC2/ARHGAP4/GRB2	9
cyan.GO:0002433	GO:0002433	immune response-regulating cell surface receptor signaling pathway involved in phagocytosis	6/112	91/16119	4.05734e-05	0.00108759	0.000782402	WIPF1/WAS/SYK/ARPC2/ACTR3/GRB2	6
cyan.GO:0038094	GO:0038094	Fc-gamma receptor signaling pathway	6/112	91/16119	4.05734e-05	0.00108759	0.000782402	WIPF1/WAS/SYK/ARPC2/ACTR3/GRB2	6
cyan.GO:0038096	GO:0038096	Fc-gamma receptor signaling pathway involved in phagocytosis	6/112	91/16119	4.05734e-05	0.00108759	0.000782402	WIPF1/WAS/SYK/ARPC2/ACTR3/GRB2	6
cyan.GO:0043087	GO:0043087	regulation of GTPase activity	13/112	500/16119	4.34891e-05	0.00114978	0.00082714	RGS1/ARHGDIB/SMAP2/MYO9B/RHOG/SIPA1/RGS19/IQSEC1/ARHGEF1/PTK2B/GMIP/SBF1/ARHGAP4	13
cyan.GO:0006469	GO:0006469	negative regulation of protein kinase activity	8/112	185/16119	4.45056e-05	0.00116075	0.000835033	PTPRC/SOCS1/PTPN6/WNK1/PTPN1/PDCD4/PTPRJ/DUSP2	8
cyan.GO:0045010	GO:0045010	actin nucleation	4/112	29/16119	4.58782e-05	0.0011806	0.00084931	WAS/CORO1A/ARPC2/ACTR3	4
cyan.GO:0070661	GO:0070661	leukocyte proliferation	9/112	242/16119	4.79029e-05	0.00121648	0.000875123	PTPRC/SASH3/CORO1A/INPP5D/CD79A/SYK/PTPN6/PRDM1/CARD11	9
cyan.GO:0001959	GO:0001959	regulation of cytokine-mediated signaling pathway	6/112	94/16119	4.87323e-05	0.00122147	0.000878714	PTPRC/JAK1/SOCS1/PTPN6/PTPN1/TYK2	6
cyan.GO:0018108	GO:0018108	peptidyl-tyrosine phosphorylation	10/112	304/16119	5.09206e-05	0.00125996	0.0009064	HCLS1/ITGB2/LCK/JAK1/SOCS1/SYK/PTPN6/PTK2B/TYK2/CSK	10
cyan.GO:0010592	GO:0010592	positive regulation of lamellipodium assembly	3/112	11/16119	5.17408e-05	0.00126405	0.000909342	ARPC2/TWF2/ACTR3	3
cyan.GO:0018212	GO:0018212	peptidyl-tyrosine modification	10/112	306/16119	5.38004e-05	0.00129793	0.00093372	HCLS1/ITGB2/LCK/JAK1/SOCS1/SYK/PTPN6/PTK2B/TYK2/CSK	10
cyan.GO:0046777	GO:0046777	protein autophosphorylation	8/112	193/16119	6.00334e-05	0.00143042	0.00102903	STK17B/LCK/JAK1/SYK/PTK2B/STK4/CSK/NEK6	8
cyan.GO:0006909	GO:0006909	phagocytosis	8/112	194/16119	6.22578e-05	0.00146534	0.00105415	WIPF1/WAS/CORO1A/SYK/ARPC2/ACTR3/CSK/GRB2	8
cyan.GO:0060759	GO:0060759	regulation of response to cytokine stimulus	6/112	100/16119	6.89814e-05	0.00159929	0.00115051	PTPRC/JAK1/SOCS1/PTPN6/PTPN1/TYK2	6
cyan.GO:0050863	GO:0050863	regulation of T cell activation	9/112	254/16119	6.96065e-05	0.00159929	0.00115051	PTPRC/SASH3/CORO1A/LCK/SYK/PTPN6/CARD11/CSK/GRB2	9
cyan.GO:0010638	GO:0010638	positive regulation of organelle organization	10/112	317/16119	7.2251e-05	0.00163663	0.00117737	HCLS1/PLEK/WAS/CORO1A/DNM1L/PTK2B/ARPC2/BIK/ACTR3/GRB2	10
cyan.GO:0035335	GO:0035335	peptidyl-tyrosine dephosphorylation	6/112	101/16119	7.29274e-05	0.00163663	0.00117737	PTPRC/PTPN6/PTPN18/PTPN1/PTPRJ/DUSP2	6
cyan.GO:0043623	GO:0043623	cellular protein complex assembly	11/112	386/16119	7.76122e-05	0.00172174	0.0012386	HCLS1/EPS15/WAS/CORO1A/MBD2/DNM1L/PTK2B/ARPC2/TWF2/ACTR3/GRB2	11
cyan.GO:0002443	GO:0002443	leukocyte mediated immunity	9/112	260/16119	8.32456e-05	0.00182573	0.00131341	FAS/PTPRC/SASH3/RFTN1/SERPINB9/CD27/INPP5D/SYK/PTPN6	9
cyan.GO:0016311	GO:0016311	dephosphorylation	11/112	392/16119	8.90249e-05	0.00193054	0.00138881	PTPRC/PLEK/INPP5D/LCK/PTPN6/WNK1/PTPN18/PTPN1/PTPRJ/SBF1/DUSP2	11
cyan.GO:1902532	GO:1902532	negative regulation of intracellular signal transduction	10/112	332/16119	0.000105893	0.00227081	0.00163359	RASSF2/PLEK/CD27/SOCS1/PTPN6/PTPN1/PDCD4/PTPRJ/DUSP2/CSK	10
cyan.GO:0033628	GO:0033628	regulation of cell adhesion mediated by integrin	4/112	36/16119	0.000109601	0.00232451	0.00167223	LPXN/SYK/PTPN6/FERMT3	4
cyan.GO:1902745	GO:1902745	positive regulation of lamellipodium organization	3/112	14/16119	0.00011242	0.00235837	0.00169659	ARPC2/TWF2/ACTR3	3
cyan.GO:0060249	GO:0060249	anatomical structure homeostasis	9/112	271/16119	0.000114111	0.00236811	0.00170359	TERF2IP/SASH3/CORO1A/RAC2/INPP5D/SYK/PTK2B/PARP1/CSK	9
cyan.GO:0046578	GO:0046578	regulation of Ras protein signal transduction	11/112	405/16119	0.000118771	0.0024386	0.0017543	SMAP2/MYO9B/RHOG/SIPA1/IQSEC1/ARHGEF1/PTK2B/SHOC2/GMIP/SBF1/ARHGAP4	11
cyan.GO:0032970	GO:0032970	regulation of actin filament-based process	9/112	273/16119	0.000120643	0.00245096	0.00176319	HCLS1/PLEK/WAS/CORO1A/PTK2B/ARPC2/TWF2/ACTR3/GRB2	9
cyan.GO:0045088	GO:0045088	regulation of innate immune response	9/112	275/16119	0.000127485	0.00256298	0.00184378	ITGB2/RFTN1/PIK3AP1/JAK1/SOCS1/PTPN6/NFKB2/PTPN1/TYK2	9
cyan.GO:0032958	GO:0032958	inositol phosphate biosynthetic process	3/112	15/16119	0.000139814	0.00278187	0.00200125	PLEK/PTAFR/PTK2B	3
cyan.GO:0051348	GO:0051348	negative regulation of transferase activity	9/112	280/16119	0.000146026	0.00287583	0.00206884	PTPRC/SOCS1/PTPN6/WNK1/PTPN1/PDCD4/PTPRJ/DUSP2/CSK	9
cyan.GO:0097529	GO:0097529	myeloid leukocyte migration	6/112	115/16119	0.000149675	0.00291791	0.00209911	ITGB2/MYO9B/C5AR1/RAC2/SYK/PTK2B	6
cyan.GO:0031295	GO:0031295	T cell costimulation	5/112	73/16119	0.00015268	0.00294673	0.00211984	LCK/PTPN6/CARD11/CSK/GRB2	5
cyan.GO:0031294	GO:0031294	lymphocyte costimulation	5/112	74/16119	0.000162845	0.00308128	0.00221664	LCK/PTPN6/CARD11/CSK/GRB2	5
cyan.GO:0034109	GO:0034109	homotypic cell-cell adhesion	5/112	74/16119	0.000162845	0.00308128	0.00221664	PLEK/RAC2/SYK/PTPN6/FERMT3	5
cyan.GO:0090066	GO:0090066	regulation of anatomical structure size	10/112	351/16119	0.000166792	0.00312532	0.00224832	HCLS1/PLEK/WAS/CORO1A/PTK2B/ARPC2/TWF2/ACTR3/ARHGAP4/GRB2	10
cyan.GO:0060333	GO:0060333	interferon-gamma-mediated signaling pathway	5/112	75/16119	0.000173519	0.00315016	0.00226619	PTAFR/JAK1/SOCS1/PTPN6/PTPN1	5
cyan.GO:0002683	GO:0002683	negative regulation of immune system process	8/112	225/16119	0.000174185	0.00315016	0.00226619	FAS/PTPRC/INPP5D/PIK3AP1/LPXN/PTPN6/PRDM1/PTPRJ	8
cyan.GO:0010563	GO:0010563	negative regulation of phosphorus metabolic process	10/112	353/16119	0.000174646	0.00315016	0.00226619	PTPRC/PLEK/SOCS1/PTPN6/WNK1/PTPN1/PDCD4/PTPRJ/DUSP2/CSK	10
cyan.GO:0045936	GO:0045936	negative regulation of phosphate metabolic process	10/112	353/16119	0.000174646	0.00315016	0.00226619	PTPRC/PLEK/SOCS1/PTPN6/WNK1/PTPN1/PDCD4/PTPRJ/DUSP2/CSK	10
cyan.GO:0060337	GO:0060337	type I interferon signaling pathway	5/112	76/16119	0.000184719	0.00327071	0.00235291	JAK1/SOCS1/PTPN6/PTPN1/TYK2	5
cyan.GO:0071357	GO:0071357	cellular response to type I interferon	5/112	76/16119	0.000184719	0.00327071	0.00235291	JAK1/SOCS1/PTPN6/PTPN1/TYK2	5
cyan.GO:0034340	GO:0034340	response to type I interferon	5/112	77/16119	0.000196462	0.00344702	0.00247975	JAK1/SOCS1/PTPN6/PTPN1/TYK2	5
cyan.GO:0007173	GO:0007173	epidermal growth factor receptor signaling pathway	8/112	230/16119	0.000202372	0.00351872	0.00253133	RASSF2/EPS15/LCK/ADCY3/PTK2B/PTPRJ/CSK/GRB2	8
cyan.GO:0050858	GO:0050858	negative regulation of antigen receptor-mediated signaling pathway	3/112	17/16119	0.000206846	0.0035644	0.00256419	LPXN/PTPN6/PTPRJ	3
cyan.GO:0006470	GO:0006470	protein dephosphorylation	7/112	175/16119	0.00021927	0.00374505	0.00269415	PTPRC/PTPN6/PTPN18/PTPN1/PTPRJ/SBF1/DUSP2	7
cyan.GO:0043409	GO:0043409	negative regulation of MAPK cascade	6/112	124/16119	0.000225848	0.00382356	0.00275063	PTPN6/PTPN1/PDCD4/PTPRJ/DUSP2/CSK	6
cyan.GO:0038127	GO:0038127	ERBB signaling pathway	8/112	236/16119	0.000241042	0.00404531	0.00291015	RASSF2/EPS15/LCK/ADCY3/PTK2B/PTPRJ/CSK/GRB2	8
cyan.GO:0042129	GO:0042129	regulation of T cell proliferation	6/112	127/16119	0.000257089	0.00427743	0.00307714	PTPRC/SASH3/CORO1A/SYK/PTPN6/CARD11	6
cyan.GO:0042102	GO:0042102	positive regulation of T cell proliferation	5/112	82/16119	0.00026395	0.00435405	0.00313226	PTPRC/SASH3/CORO1A/SYK/CARD11	5
cyan.GO:0042326	GO:0042326	negative regulation of phosphorylation	9/112	304/16119	0.000269415	0.00437964	0.00315067	PTPRC/SOCS1/PTPN6/WNK1/PTPN1/PDCD4/PTPRJ/DUSP2/CSK	9
cyan.GO:0038093	GO:0038093	Fc receptor signaling pathway	8/112	240/16119	0.00027004	0.00437964	0.00315067	WIPF1/WAS/LCK/SYK/ARPC2/ACTR3/CARD11/GRB2	8
cyan.GO:0033627	GO:0033627	cell adhesion mediated by integrin	4/112	46/16119	0.000287838	0.0046294	0.00333034	LPXN/SYK/PTPN6/FERMT3	4
cyan.GO:0022604	GO:0022604	regulation of cell morphogenesis	10/112	380/16119	0.000315202	0.00495725	0.00356619	ITGB2/CORO1A/GNA13/ARHGEF1/PTK2B/ARPC2/TWF2/ACTR3/CUX1/ARHGAP4	10
cyan.GO:0001894	GO:0001894	tissue homeostasis	7/112	186/16119	0.000317952	0.00495725	0.00356619	SASH3/CORO1A/RAC2/INPP5D/SYK/PTK2B/CSK	7
cyan.GO:0030217	GO:0030217	T cell differentiation	7/112	186/16119	0.000317952	0.00495725	0.00356619	FAS/PTPRC/SASH3/LCK/SYK/RELB/CARD11	7
cyan.GO:0032844	GO:0032844	regulation of homeostatic process	9/112	311/16119	0.000318497	0.00495725	0.00356619	TERF2IP/PTPRC/UCP2/INPP5D/LCK/SYK/PTPN6/PTK2B/CSK	9
cyan.GO:0050730	GO:0050730	regulation of peptidyl-tyrosine phosphorylation	7/112	187/16119	0.000328449	0.00507125	0.0036482	HCLS1/ITGB2/LCK/SOCS1/SYK/PTPN6/PTK2B	7
cyan.GO:0048015	GO:0048015	phosphatidylinositol-mediated signaling	7/112	190/16119	0.00036162	0.00549548	0.00395339	HCLS1/PTAFR/PIK3AP1/LCK/PTPN6/PIK3C2B/GRB2	7
cyan.GO:0048017	GO:0048017	inositol lipid-mediated signaling	7/112	190/16119	0.00036162	0.00549548	0.00395339	HCLS1/PTAFR/PIK3AP1/LCK/PTPN6/PIK3C2B/GRB2	7
cyan.GO:0007229	GO:0007229	integrin-mediated signaling pathway	5/112	88/16119	0.000366677	0.00552879	0.00397735	ITGB2/PLEK/SYK/FERMT3/PTK2B	5
cyan.GO:0048771	GO:0048771	tissue remodeling	6/112	136/16119	0.000371612	0.00555977	0.00399964	RASSF2/RAC2/INPP5D/SYK/PTK2B/CSK	6
cyan.GO:0001933	GO:0001933	negative regulation of protein phosphorylation	8/112	254/16119	0.00039491	0.00584093	0.0042019	PTPRC/SOCS1/PTPN6/WNK1/PTPN1/PDCD4/PTPRJ/DUSP2	8
cyan.GO:0010591	GO:0010591	regulation of lamellipodium assembly	3/112	21/16119	0.000396457	0.00584093	0.0042019	ARPC2/TWF2/ACTR3	3
cyan.GO:0007159	GO:0007159	leukocyte cell-cell adhesion	4/112	51/16119	0.000429194	0.00622815	0.00448047	ITGB2/RAC2/SYK/FERMT3	4
cyan.GO:0070527	GO:0070527	platelet aggregation	4/112	51/16119	0.000429194	0.00622815	0.00448047	PLEK/SYK/PTPN6/FERMT3	4
cyan.GO:0030595	GO:0030595	leukocyte chemotaxis	6/112	141/16119	0.000450565	0.00648948	0.00466846	ITGB2/MYO9B/C5AR1/CORO1A/SYK/PTK2B	6
cyan.GO:0050859	GO:0050859	negative regulation of B cell receptor signaling pathway	2/112	5/16119	0.000472012	0.00669841	0.00481876	LPXN/PTPN6	2
cyan.GO:1901741	GO:1901741	positive regulation of myoblast fusion	2/112	5/16119	0.000472012	0.00669841	0.00481876	CD53/EHD1	2
cyan.GO:0060326	GO:0060326	cell chemotaxis	7/112	199/16119	0.000477545	0.00672746	0.00483966	ITGB2/MYO9B/RHOG/C5AR1/CORO1A/SYK/PTK2B	7
cyan.GO:0034314	GO:0034314	Arp2/3 complex-mediated actin nucleation	3/112	23/16119	0.000522601	0.00725625	0.00522007	WAS/ARPC2/ACTR3	3
cyan.GO:0060397	GO:0060397	JAK-STAT cascade involved in growth hormone signaling pathway	3/112	23/16119	0.000522601	0.00725625	0.00522007	SOCS1/PTPN6/PTPN1	3
cyan.GO:0043405	GO:0043405	regulation of MAP kinase activity	8/112	267/16119	0.000549585	0.00757642	0.00545039	C5AR1/SYK/PTPN6/PTK2B/PDCD4/PTPRJ/DUSP2/CSK	8
cyan.GO:0032318	GO:0032318	regulation of Ras GTPase activity	9/112	336/16119	0.000558121	0.00763952	0.00549579	SMAP2/MYO9B/RHOG/SIPA1/ARHGEF1/PTK2B/GMIP/SBF1/ARHGAP4	9
cyan.GO:0051493	GO:0051493	regulation of cytoskeleton organization	9/112	338/16119	0.000582392	0.00786075	0.00565494	HCLS1/PLEK/WAS/CORO1A/PTK2B/ARPC2/TWF2/ACTR3/GRB2	9
cyan.GO:0032321	GO:0032321	positive regulation of Rho GTPase activity	6/112	148/16119	0.000582429	0.00786075	0.00565494	MYO9B/RHOG/ARHGEF1/PTK2B/GMIP/ARHGAP4	6
cyan.GO:0050856	GO:0050856	regulation of T cell receptor signaling pathway	3/112	24/16119	0.000594246	0.00796455	0.00572961	LCK/PTPN6/PTPRJ	3
cyan.GO:0071346	GO:0071346	cellular response to interferon-gamma	5/112	98/16119	0.00060166	0.0080083	0.00576108	PTAFR/JAK1/SOCS1/PTPN6/PTPN1	5
cyan.GO:0002449	GO:0002449	lymphocyte mediated immunity	7/112	208/16119	0.000621398	0.00821438	0.00590933	FAS/PTPRC/SASH3/RFTN1/CD27/INPP5D/PTPN6	7
cyan.GO:0031589	GO:0031589	cell-substrate adhesion	8/112	275/16119	0.000666979	0.00875694	0.00629964	ITGB2/CORO1A/RAC2/PLEKHA2/FERMT3/PTK2B/ARPC2/PTPRJ	8
cyan.GO:0045588	GO:0045588	positive regulation of gamma-delta T cell differentiation	2/112	6/16119	0.000704802	0.009191	0.0066119	LCK/SYK	2
cyan.GO:0042098	GO:0042098	T cell proliferation	6/112	155/16119	0.000742503	0.00955354	0.00687271	PTPRC/SASH3/CORO1A/SYK/PTPN6/CARD11	6
cyan.GO:0070372	GO:0070372	regulation of ERK1 and ERK2 cascade	6/112	155/16119	0.000742503	0.00955354	0.00687271	C5AR1/SYK/PTPN6/PTK2B/PTPN1/CSK	6
cyan.GO:0097581	GO:0097581	lamellipodium organization	4/112	59/16119	0.000749053	0.00957398	0.00688742	MYO9B/ARPC2/TWF2/ACTR3	4
cyan.GO:0032320	GO:0032320	positive regulation of Ras GTPase activity	8/112	282/16119	0.000785604	0.0099751	0.00717598	MYO9B/RHOG/SIPA1/ARHGEF1/PTK2B/GMIP/SBF1/ARHGAP4	8
cyan.GO:0032845	GO:0032845	negative regulation of homeostatic process	3/112	27/16119	0.000845861	0.0105812	0.00761198	TERF2IP/INPP5D/CSK	3
cyan.GO:1902743	GO:1902743	regulation of lamellipodium organization	3/112	27/16119	0.000845861	0.0105812	0.00761198	ARPC2/TWF2/ACTR3	3
cyan.GO:1990266	GO:1990266	neutrophil migration	4/112	61/16119	0.000849783	0.0105812	0.00761198	ITGB2/C5AR1/RAC2/SYK	4
cyan.GO:0043647	GO:0043647	inositol phosphate metabolic process	4/112	63/16119	0.00095971	0.0118733	0.00854155	PLEK/PTAFR/INPP5D/PTK2B	4
cyan.GO:1901739	GO:1901739	regulation of myoblast fusion	2/112	7/16119	0.000982242	0.0120747	0.00868641	CD53/EHD1	2
cyan.GO:0032459	GO:0032459	regulation of protein oligomerization	3/112	29/16119	0.00104606	0.0126975	0.00913441	FAS/DNM1L/BIK	3
cyan.GO:0050869	GO:0050869	negative regulation of B cell activation	3/112	29/16119	0.00104606	0.0126975	0.00913441	FAS/INPP5D/PRDM1	3
cyan.GO:0007259	GO:0007259	JAK-STAT cascade	5/112	112/16119	0.0011007	0.0132772	0.00955149	HCLS1/LCK/SOCS1/PTPN6/PTPN1	5
cyan.GO:0071375	GO:0071375	cellular response to peptide hormone stimulus	8/112	298/16119	0.00112109	0.0134392	0.00966801	UCP2/SOCS1/PTPN6/ADCY3/PTPN1/PARP1/CSK/GRB2	8
cyan.GO:0070371	GO:0070371	ERK1 and ERK2 cascade	6/112	168/16119	0.0011281	0.0134397	0.00966834	C5AR1/SYK/PTPN6/PTK2B/PTPN1/CSK	6
cyan.GO:0050671	GO:0050671	positive regulation of lymphocyte proliferation	5/112	113/16119	0.00114537	0.0135617	0.00975616	PTPRC/SASH3/CORO1A/SYK/CARD11	5
cyan.GO:0060396	GO:0060396	growth hormone receptor signaling pathway	3/112	30/16119	0.00115644	0.0136036	0.00978626	SOCS1/PTPN6/PTPN1	3
cyan.GO:0045785	GO:0045785	positive regulation of cell adhesion	6/112	169/16119	0.00116311	0.0136036	0.00978626	PLEKHA2/SYK/PTPN6/PTK2B/ARPC2/PTPRJ	6
cyan.GO:0030099	GO:0030099	myeloid cell differentiation	8/112	300/16119	0.00117005	0.0136036	0.00978626	FAS/HCLS1/RASSF2/INPP5D/PTPN6/RELB/PTK2B/PARP1	8
cyan.GO:0032946	GO:0032946	positive regulation of mononuclear cell proliferation	5/112	114/16119	0.00119136	0.0137685	0.00990488	PTPRC/SASH3/CORO1A/SYK/CARD11	5
cyan.GO:0031532	GO:0031532	actin cytoskeleton reorganization	4/112	67/16119	0.00120894	0.0138884	0.00999114	HCLS1/PLEK/PTK2B/PTPN1	4
cyan.GO:0071378	GO:0071378	cellular response to growth hormone stimulus	3/112	31/16119	0.0012739	0.0145481	0.0104657	SOCS1/PTPN6/PTPN1	3
cyan.GO:0032959	GO:0032959	inositol trisphosphate biosynthetic process	2/112	8/16119	0.00130371	0.0147144	0.0105854	PTAFR/PTK2B	2
cyan.GO:0046645	GO:0046645	positive regulation of gamma-delta T cell activation	2/112	8/16119	0.00130371	0.0147144	0.0105854	LCK/SYK	2
cyan.GO:0032319	GO:0032319	regulation of Rho GTPase activity	6/112	173/16119	0.00131156	0.0147169	0.0105872	MYO9B/RHOG/ARHGEF1/PTK2B/GMIP/ARHGAP4	6
cyan.GO:0070665	GO:0070665	positive regulation of leukocyte proliferation	5/112	117/16119	0.00133757	0.014922	0.0107348	PTPRC/SASH3/CORO1A/SYK/CARD11	5
cyan.GO:0045744	GO:0045744	negative regulation of G-protein coupled receptor protein signaling pathway	4/112	69/16119	0.00134913	0.0149645	0.0107653	RGS1/PLEK/RGS19/ARHGEF1	4
cyan.GO:0034341	GO:0034341	response to interferon-gamma	5/112	118/16119	0.00138913	0.0152504	0.010971	PTAFR/JAK1/SOCS1/PTPN6/PTPN1	5
cyan.GO:0045124	GO:0045124	regulation of bone resorption	3/112	32/16119	0.00139861	0.0152504	0.010971	INPP5D/SYK/CSK	3
cyan.GO:0046173	GO:0046173	polyol biosynthetic process	3/112	32/16119	0.00139861	0.0152504	0.010971	PLEK/PTAFR/PTK2B	3
cyan.GO:1901653	GO:1901653	cellular response to peptide	8/112	309/16119	0.00141192	0.015309	0.0110132	UCP2/SOCS1/PTPN6/ADCY3/PTPN1/PARP1/CSK/GRB2	8
cyan.GO:0043407	GO:0043407	negative regulation of MAP kinase activity	4/112	71/16119	0.0015003	0.01616	0.0116253	PTPN6/PDCD4/PTPRJ/DUSP2	4
cyan.GO:0032386	GO:0032386	regulation of intracellular transport	9/112	387/16119	0.00150715	0.01616	0.0116253	HCLS1/LCP1/EHD1/CD27/SYK/PTPN6/PTK2B/PARP1/CSK	9
cyan.GO:0019221	GO:0019221	cytokine-mediated signaling pathway	9/112	389/16119	0.00156147	0.0166499	0.0119777	PTPRC/PTAFR/JAK1/SOCS1/PTPN6/PTK2B/PTPN1/TYK2/NUP210	9
cyan.GO:0048871	GO:0048871	multicellular organismal homeostasis	7/112	244/16119	0.00157329	0.0166648	0.0119885	SASH3/CORO1A/RAC2/INPP5D/SYK/PTK2B/CSK	7
cyan.GO:0030048	GO:0030048	actin filament-based movement	4/112	72/16119	0.00158014	0.0166648	0.0119885	WIPF1/WAS/MYO9B/MYO1E	4
cyan.GO:0032464	GO:0032464	positive regulation of protein homooligomerization	2/112	9/16119	0.0016686	0.0171298	0.012323	FAS/BIK	2
cyan.GO:0032957	GO:0032957	inositol trisphosphate metabolic process	2/112	9/16119	0.0016686	0.0171298	0.012323	PTAFR/PTK2B	2
cyan.GO:0045586	GO:0045586	regulation of gamma-delta T cell differentiation	2/112	9/16119	0.0016686	0.0171298	0.012323	LCK/SYK	2
cyan.GO:0045779	GO:0045779	negative regulation of bone resorption	2/112	9/16119	0.0016686	0.0171298	0.012323	INPP5D/CSK	2
cyan.GO:0060143	GO:0060143	positive regulation of syncytium formation by plasma membrane fusion	2/112	9/16119	0.0016686	0.0171298	0.012323	CD53/EHD1	2
cyan.GO:0030890	GO:0030890	positive regulation of B cell proliferation	3/112	35/16119	0.00181785	0.0185632	0.0133542	PTPRC/SASH3/CARD11	3
cyan.GO:1901699	GO:1901699	cellular response to nitrogen compound	10/112	482/16119	0.00193609	0.0196666	0.0141479	UCP2/SOCS1/PTPN6/RBM3/ADCY3/PTPN1/PPP1R9B/PARP1/CSK/GRB2	10
cyan.GO:0038061	GO:0038061	NIK/NF-kappaB signaling	3/112	36/16119	0.00197315	0.0199381	0.0143432	RASSF2/NFKB2/RELB	3
cyan.GO:0051209	GO:0051209	release of sequestered calcium ion into cytosol	4/112	77/16119	0.0020241	0.0201366	0.0144861	PTPRC/LCK/PTPN6/PTK2B	4
cyan.GO:0051283	GO:0051283	negative regulation of sequestering of calcium ion	4/112	77/16119	0.0020241	0.0201366	0.0144861	PTPRC/LCK/PTPN6/PTK2B	4
cyan.GO:2000377	GO:2000377	regulation of reactive oxygen species metabolic process	4/112	77/16119	0.0020241	0.0201366	0.0144861	RAC2/SYK/PTK2B/GRB2	4
cyan.GO:0010919	GO:0010919	regulation of inositol phosphate biosynthetic process	2/112	10/16119	0.00207629	0.0203414	0.0146334	PLEK/PTK2B	2
cyan.GO:0032863	GO:0032863	activation of Rac GTPase activity	2/112	10/16119	0.00207629	0.0203414	0.0146334	RHOG/PTK2B	2
cyan.GO:0042492	GO:0042492	gamma-delta T cell differentiation	2/112	10/16119	0.00207629	0.0203414	0.0146334	LCK/SYK	2
cyan.GO:0051282	GO:0051282	regulation of sequestering of calcium ion	4/112	78/16119	0.00212222	0.0206863	0.0148815	PTPRC/LCK/PTPN6/PTK2B	4
cyan.GO:0001954	GO:0001954	positive regulation of cell-matrix adhesion	3/112	37/16119	0.00213646	0.0207205	0.0149061	PLEKHA2/PTK2B/PTPRJ	3
cyan.GO:0071900	GO:0071900	regulation of protein serine/threonine kinase activity	9/112	409/16119	0.00219627	0.021194	0.0152468	C5AR1/SYK/PTPN6/PTK2B/STK4/PDCD4/PTPRJ/DUSP2/CSK	9
cyan.GO:0097530	GO:0097530	granulocyte migration	4/112	79/16119	0.00222359	0.0213509	0.0153596	ITGB2/C5AR1/RAC2/SYK	4
cyan.GO:0045058	GO:0045058	T cell selection	3/112	38/16119	0.00230794	0.0219425	0.0157852	FAS/SYK/CARD11	3
cyan.GO:0060416	GO:0060416	response to growth hormone	3/112	38/16119	0.00230794	0.0219425	0.0157852	SOCS1/PTPN6/PTPN1	3
cyan.GO:0038032	GO:0038032	termination of G-protein coupled receptor signaling pathway	3/112	39/16119	0.00248772	0.023421	0.0168488	RGS1/RGS19/ARHGEF1	3
cyan.GO:0046850	GO:0046850	regulation of bone remodeling	3/112	39/16119	0.00248772	0.023421	0.0168488	INPP5D/SYK/CSK	3
cyan.GO:0046643	GO:0046643	regulation of gamma-delta T cell activation	2/112	11/16119	0.0025262	0.0234624	0.0168786	LCK/SYK	2
cyan.GO:0046851	GO:0046851	negative regulation of bone remodeling	2/112	11/16119	0.0025262	0.0234624	0.0168786	INPP5D/CSK	2
cyan.GO:0035023	GO:0035023	regulation of Rho protein signal transduction	6/112	197/16119	0.0025286	0.0234624	0.0168786	MYO9B/RHOG/ARHGEF1/PTK2B/GMIP/ARHGAP4	6
cyan.GO:0048008	GO:0048008	platelet-derived growth factor receptor signaling pathway	3/112	41/16119	0.0028727	0.0265278	0.0190838	MYO1E/PTPN1/PTPRJ	3
cyan.GO:0002576	GO:0002576	platelet degranulation	4/112	85/16119	0.00290276	0.0266778	0.0191917	PLEK/SYK/CAP1/WDR1	4
cyan.GO:0007204	GO:0007204	positive regulation of cytosolic calcium ion concentration	6/112	204/16119	0.00300674	0.0274725	0.0197634	PTPRC/C5AR1/LCK/PTPN6/GNA13/PTK2B	6
cyan.GO:0050855	GO:0050855	regulation of B cell receptor signaling pathway	2/112	12/16119	0.00301771	0.0274725	0.0197634	LPXN/PTPN6	2
cyan.GO:0023021	GO:0023021	termination of signal transduction	3/112	42/16119	0.00307817	0.0278914	0.0200648	RGS1/RGS19/ARHGEF1	3
cyan.GO:0008277	GO:0008277	regulation of G-protein coupled receptor protein signaling pathway	5/112	142/16119	0.00312013	0.0281395	0.0202433	RGS1/PLEK/RGS19/ARHGEF1/PPP1R9B	5
cyan.GO:0048872	GO:0048872	homeostasis of number of cells	6/112	206/16119	0.00315501	0.0283217	0.0203743	FAS/HCLS1/SASH3/RASSF2/CORO1A/INPP5D	6
cyan.GO:0001892	GO:0001892	embryonic placenta development	4/112	88/16119	0.00329036	0.029283	0.0210659	PRDM1/NCOA3/STK4/GRB2	4
cyan.GO:0042059	GO:0042059	negative regulation of epidermal growth factor receptor signaling pathway	3/112	43/16119	0.00329244	0.029283	0.0210659	EPS15/PTPRJ/GRB2	3
cyan.GO:0010810	GO:0010810	regulation of cell-substrate adhesion	5/112	146/16119	0.00351459	0.0307263	0.0221042	RAC2/PLEKHA2/PTK2B/ARPC2/PTPRJ	5
cyan.GO:1901185	GO:1901185	negative regulation of ERBB signaling pathway	3/112	44/16119	0.00351564	0.0307263	0.0221042	EPS15/PTPRJ/GRB2	3
cyan.GO:0034104	GO:0034104	negative regulation of tissue remodeling	2/112	13/16119	0.00355024	0.0307263	0.0221042	INPP5D/CSK	2
cyan.GO:0050857	GO:0050857	positive regulation of antigen receptor-mediated signaling pathway	2/112	13/16119	0.00355024	0.0307263	0.0221042	PTPRC/LCK	2
cyan.GO:0050860	GO:0050860	negative regulation of T cell receptor signaling pathway	2/112	13/16119	0.00355024	0.0307263	0.0221042	PTPN6/PTPRJ	2
cyan.GO:0060142	GO:0060142	regulation of syncytium formation by plasma membrane fusion	2/112	13/16119	0.00355024	0.0307263	0.0221042	CD53/EHD1	2
cyan.GO:0010811	GO:0010811	positive regulation of cell-substrate adhesion	4/112	90/16119	0.00356749	0.0307378	0.0221124	PLEKHA2/PTK2B/ARPC2/PTPRJ	4
cyan.GO:0031344	GO:0031344	regulation of cell projection organization	8/112	361/16119	0.00369279	0.0316759	0.0227873	RHOG/ARHGEF1/PTK2B/ARPC2/TWF2/ACTR3/CUX1/ARHGAP4	8
cyan.GO:0071417	GO:0071417	cellular response to organonitrogen compound	9/112	443/16119	0.00373422	0.0318896	0.022941	UCP2/SOCS1/PTPN6/ADCY3/PTPN1/PPP1R9B/PARP1/CSK/GRB2	9
cyan.GO:0060491	GO:0060491	regulation of cell projection assembly	4/112	93/16119	0.0040123	0.0341134	0.0245408	RHOG/ARPC2/TWF2/ACTR3	4
cyan.GO:0033622	GO:0033622	integrin activation	2/112	14/16119	0.00412321	0.0347502	0.0249989	PLEK/FERMT3	2
cyan.GO:0051125	GO:0051125	regulation of actin nucleation	2/112	14/16119	0.00412321	0.0347502	0.0249989	WAS/CORO1A	2
cyan.GO:0046425	GO:0046425	regulation of JAK-STAT cascade	4/112	95/16119	0.00432883	0.0363245	0.0261314	HCLS1/LCK/SOCS1/PTK2B	4
cyan.GO:0051480	GO:0051480	cytosolic calcium ion homeostasis	6/112	220/16119	0.00435087	0.0363514	0.0261508	PTPRC/C5AR1/LCK/PTPN6/GNA13/PTK2B	6
cyan.GO:0045580	GO:0045580	regulation of T cell differentiation	4/112	96/16119	0.00449323	0.037379	0.0268901	SASH3/LCK/SYK/CARD11	4
cyan.GO:0045637	GO:0045637	regulation of myeloid cell differentiation	5/112	155/16119	0.00453136	0.0375344	0.0270019	FAS/HCLS1/RASSF2/INPP5D/PTK2B	5
cyan.GO:0030889	GO:0030889	negative regulation of B cell proliferation	2/112	15/16119	0.00473604	0.0387312	0.0278628	INPP5D/PRDM1	2
cyan.GO:0032462	GO:0032462	regulation of protein homooligomerization	2/112	15/16119	0.00473604	0.0387312	0.0278628	FAS/BIK	2
cyan.GO:0046622	GO:0046622	positive regulation of organ growth	2/112	15/16119	0.00473604	0.0387312	0.0278628	SASH3/BASP1	2
cyan.GO:0031100	GO:0031100	organ regeneration	3/112	49/16119	0.00476946	0.0388399	0.027941	LCP1/C5AR1/UCP2	3
cyan.GO:0007568	GO:0007568	aging	6/112	225/16119	0.00485001	0.0393299	0.0282935	UCP2/INPP5D/LCK/PDCD4/GRB2/NEK6	6
cyan.GO:0014068	GO:0014068	positive regulation of phosphatidylinositol 3-kinase signaling	3/112	51/16119	0.00533722	0.0426194	0.03066	HCLS1/PIK3AP1/PTPN6	3
cyan.GO:0033630	GO:0033630	positive regulation of cell adhesion mediated by integrin	2/112	16/16119	0.00538816	0.0426194	0.03066	SYK/PTPN6	2
cyan.GO:0046629	GO:0046629	gamma-delta T cell activation	2/112	16/16119	0.00538816	0.0426194	0.03066	LCK/SYK	2
cyan.GO:0050775	GO:0050775	positive regulation of dendrite morphogenesis	2/112	16/16119	0.00538816	0.0426194	0.03066	ACTR3/CUX1	2
cyan.GO:0061318	GO:0061318	renal filtration cell differentiation	2/112	16/16119	0.00538816	0.0426194	0.03066	BASP1/MYO1E	2
cyan.GO:0072112	GO:0072112	glomerular visceral epithelial cell differentiation	2/112	16/16119	0.00538816	0.0426194	0.03066	BASP1/MYO1E	2
cyan.GO:0030032	GO:0030032	lamellipodium assembly	3/112	52/16119	0.00563567	0.0443953	0.0319375	ARPC2/TWF2/ACTR3	3
cyan.GO:0051250	GO:0051250	negative regulation of lymphocyte activation	4/112	103/16119	0.00576317	0.0450321	0.0323956	FAS/INPP5D/PTPN6/PRDM1	4
cyan.GO:0060402	GO:0060402	calcium ion transport into cytosol	4/112	103/16119	0.00576317	0.0450321	0.0323956	PTPRC/LCK/PTPN6/PTK2B	4
cyan.GO:0042509	GO:0042509	regulation of tyrosine phosphorylation of STAT protein	3/112	53/16119	0.00594396	0.0462128	0.033245	HCLS1/LCK/SOCS1	3
cyan.GO:0060401	GO:0060401	cytosolic calcium ion transport	4/112	104/16119	0.00596217	0.0462128	0.033245	PTPRC/LCK/PTPN6/PTK2B	4
cyan.GO:0002823	GO:0002823	negative regulation of adaptive immune response based on somatic recombination of immune receptors built from immunoglobulin superfamily domains	2/112	17/16119	0.006079	0.0463734	0.0333605	PTPRC/PTPN6	2
cyan.GO:0030852	GO:0030852	regulation of granulocyte differentiation	2/112	17/16119	0.006079	0.0463734	0.0333605	HCLS1/INPP5D	2
cyan.GO:0034383	GO:0034383	low-density lipoprotein particle clearance	2/112	17/16119	0.006079	0.0463734	0.0333605	EHD1/CSK	2
cyan.GO:0072311	GO:0072311	glomerular epithelial cell differentiation	2/112	17/16119	0.006079	0.0463734	0.0333605	BASP1/MYO1E	2
cyan.GO:0043434	GO:0043434	response to peptide hormone	8/112	395/16119	0.00629677	0.0475541	0.0342099	UCP2/SOCS1/PTPN6/ADCY3/PTPN1/PARP1/CSK/GRB2	8
cyan.GO:0019751	GO:0019751	polyol metabolic process	4/112	106/16119	0.00637378	0.0475541	0.0342099	PLEK/PTAFR/INPP5D/PTK2B	4
cyan.GO:0002573	GO:0002573	myeloid leukocyte differentiation	5/112	170/16119	0.00666638	0.0475541	0.0342099	HCLS1/RASSF2/INPP5D/RELB/PARP1	5
cyan.GO:0031400	GO:0031400	negative regulation of protein modification process	8/112	400/16119	0.00677465	0.0475541	0.0342099	PTPRC/SOCS1/PTPN6/WNK1/PTPN1/PDCD4/PTPRJ/DUSP2	8
cyan.GO:0032456	GO:0032456	endocytic recycling	2/112	18/16119	0.006808	0.0475541	0.0342099	EPS15/EHD1	2
cyan.GO:0032461	GO:0032461	positive regulation of protein oligomerization	2/112	18/16119	0.006808	0.0475541	0.0342099	FAS/BIK	2
cyan.GO:0032945	GO:0032945	negative regulation of mononuclear cell proliferation	3/112	56/16119	0.00692863	0.0475541	0.0342099	INPP5D/PTPN6/PRDM1	3
cyan.GO:0050672	GO:0050672	negative regulation of lymphocyte proliferation	3/112	56/16119	0.00692863	0.0475541	0.0342099	INPP5D/PTPN6/PRDM1	3
cyan.GO:0003373	GO:0003373	dynamin polymerization involved in membrane fission	1/112	1/16119	0.00694832	0.0475541	0.0342099	DNM1L	1
cyan.GO:0003374	GO:0003374	dynamin polymerization involved in mitochondrial fission	1/112	1/16119	0.00694832	0.0475541	0.0342099	DNM1L	1
cyan.GO:0010920	GO:0010920	negative regulation of inositol phosphate biosynthetic process	1/112	1/16119	0.00694832	0.0475541	0.0342099	PLEK	1
cyan.GO:0010924	GO:0010924	regulation of inositol-polyphosphate 5-phosphatase activity	1/112	1/16119	0.00694832	0.0475541	0.0342099	PLEK	1
cyan.GO:0010925	GO:0010925	positive regulation of inositol-polyphosphate 5-phosphatase activity	1/112	1/16119	0.00694832	0.0475541	0.0342099	PLEK	1
cyan.GO:0030845	GO:0030845	phospholipase C-inhibiting G-protein coupled receptor signaling pathway	1/112	1/16119	0.00694832	0.0475541	0.0342099	PLEK	1
cyan.GO:0031038	GO:0031038	myosin II filament organization	1/112	1/16119	0.00694832	0.0475541	0.0342099	ACTR3	1
cyan.GO:0032532	GO:0032532	regulation of microvillus length	1/112	1/16119	0.00694832	0.0475541	0.0342099	TWF2	1
cyan.GO:0038167	GO:0038167	epidermal growth factor receptor signaling pathway via positive regulation of NF-kappaB transcription factor activity	1/112	1/16119	0.00694832	0.0475541	0.0342099	RASSF2	1
cyan.GO:0038168	GO:0038168	epidermal growth factor receptor signaling pathway via I-kappaB kinase/NF-kappaB cascade	1/112	1/16119	0.00694832	0.0475541	0.0342099	RASSF2	1
cyan.GO:0038178	GO:0038178	complement component C5a signaling pathway	1/112	1/16119	0.00694832	0.0475541	0.0342099	C5AR1	1
cyan.GO:0043519	GO:0043519	regulation of myosin II filament organization	1/112	1/16119	0.00694832	0.0475541	0.0342099	ACTR3	1
cyan.GO:0045659	GO:0045659	negative regulation of neutrophil differentiation	1/112	1/16119	0.00694832	0.0475541	0.0342099	INPP5D	1
cyan.GO:0048239	GO:0048239	negative regulation of DNA recombination at telomere	1/112	1/16119	0.00694832	0.0475541	0.0342099	TERF2IP	1
cyan.GO:0060305	GO:0060305	regulation of cell diameter	1/112	1/16119	0.00694832	0.0475541	0.0342099	PLEK	1
cyan.GO:0071226	GO:0071226	cellular response to molecule of fungal origin	1/112	1/16119	0.00694832	0.0475541	0.0342099	SYK	1
cyan.GO:0072695	GO:0072695	regulation of DNA recombination at telomere	1/112	1/16119	0.00694832	0.0475541	0.0342099	TERF2IP	1
cyan.GO:0090148	GO:0090148	membrane fission	1/112	1/16119	0.00694832	0.0475541	0.0342099	DNM1L	1
cyan.GO:0090149	GO:0090149	membrane fission involved in mitochondrial fission	1/112	1/16119	0.00694832	0.0475541	0.0342099	DNM1L	1
cyan.GO:1903044	GO:1903044	protein localization to membrane raft	1/112	1/16119	0.00694832	0.0475541	0.0342099	RFTN1	1
cyan.GO:1990264	GO:1990264	peptidyl-tyrosine dephosphorylation involved in inactivation of protein kinase activity	1/112	1/16119	0.00694832	0.0475541	0.0342099	PTPN1	1
cyan.GO:0032870	GO:0032870	cellular response to hormone stimulus	9/112	490/16119	0.00712882	0.0486171	0.0349746	SERPINB9/UCP2/SOCS1/PTPN6/ADCY3/PTPN1/PARP1/CSK/GRB2	9
cyan.GO:0008360	GO:0008360	regulation of cell shape	4/112	110/16119	0.00725275	0.0492797	0.0354513	ITGB2/CORO1A/GNA13/PTK2B	4
cyan.GO:0034103	GO:0034103	regulation of tissue remodeling	3/112	57/16119	0.00727705	0.0492797	0.0354513	INPP5D/SYK/CSK	3
darkgreen.GO:0040016	GO:0040016	embryonic cleavage	2/30	7/16119	6.99155e-05	0.0356342	0.0268526	TOP2A/AATF	2
darkgreen.GO:0045924	GO:0045924	regulation of female receptivity	2/30	8/16119	9.31127e-05	0.0356342	0.0268526	PPP1R1B/THRA	2
darkgreen.GO:0060180	GO:0060180	female mating behavior	2/30	9/16119	0.000119578	0.0356342	0.0268526	PPP1R1B/THRA	2
greenyellow.GO:0043588	GO:0043588	skin development	25/149	341/16119	8.62791e-16	1.9732e-12	1.57936e-12	PPARD/OVOL1/ALDH3A2/NAB2/CDH3/EPHA2/GJB3/DSP/ITGB4/LAMA3/LAMB3/EVPL/COL17A1/FZD6/LAMC2/AQP3/CNFN/MAP2K1/CRABP2/PPL/ANXA1/ITGA3/FABP5/EMP1/SFN	25
greenyellow.GO:0008544	GO:0008544	epidermis development	22/149	299/16119	5.01023e-14	5.7292e-11	4.58568e-11	PPARD/OVOL1/ALDH3A2/NAB2/CDH3/EPHA2/DSP/LAMA3/LAMB3/EVPL/COL17A1/FZD6/LAMC2/AQP3/CNFN/MAP2K1/CRABP2/PPL/ANXA1/FABP5/EMP1/SFN	22
greenyellow.GO:0034330	GO:0034330	cell junction organization	16/149	229/16119	3.74904e-10	2.84584e-07	2.27782e-07	PVRL4/PERP/CD9/CDH3/DSP/PKP3/ITGB4/LAMA3/PLEC/PXN/LAMB3/COL17A1/LAMC2/GJB2/RHOD/PVRL1	16
greenyellow.GO:0031581	GO:0031581	hemidesmosome assembly	6/149	12/16119	4.97741e-10	2.84584e-07	2.27782e-07	ITGB4/LAMA3/PLEC/LAMB3/COL17A1/LAMC2	6
greenyellow.GO:0034329	GO:0034329	cell junction assembly	14/149	203/16119	5.89009e-09	2.69413e-06	2.15639e-06	PVRL4/CD9/CDH3/PKP3/ITGB4/LAMA3/PLEC/PXN/LAMB3/COL17A1/LAMC2/GJB2/RHOD/PVRL1	14
greenyellow.GO:0071294	GO:0071294	cellular response to zinc ion	5/149	12/16119	4.74327e-08	1.6237e-05	1.29962e-05	MT2A/MT1X/MT1G/MT1E/MT1F	5
greenyellow.GO:0010043	GO:0010043	response to zinc ion	7/149	38/16119	4.96978e-08	1.6237e-05	1.29962e-05	MT2A/MT1X/MT1G/MT1E/S100A9/MT1F/S100A8	7
greenyellow.GO:0098602	GO:0098602	single organism cell adhesion	17/149	372/16119	6.20905e-08	1.77501e-05	1.42073e-05	PTPRU/PERP/CDH3/EPHA1/HSPB1/DSP/PKP3/DSC2/PXN/TACSTD2/ADAM8/S100A9/MAP2K1/PVRL1/IL1RN/MPZL2/S100A8	17
greenyellow.GO:0030216	GO:0030216	keratinocyte differentiation	10/149	118/16119	1.3974e-07	3.55095e-05	2.8422e-05	CDH3/EPHA2/DSP/EVPL/AQP3/CNFN/MAP2K1/PPL/ANXA1/SFN	10
greenyellow.GO:0007044	GO:0007044	cell-substrate junction assembly	8/149	73/16119	3.57148e-07	8.16798e-05	6.53769e-05	ITGB4/LAMA3/PLEC/PXN/LAMB3/COL17A1/LAMC2/RHOD	8
greenyellow.GO:0002934	GO:0002934	desmosome organization	4/149	8/16119	4.76958e-07	9.16211e-05	7.3334e-05	PERP/DSP/PKP3/PVRL1	4
greenyellow.GO:0009913	GO:0009913	epidermal cell differentiation	11/149	169/16119	4.8074e-07	9.16211e-05	7.3334e-05	OVOL1/CDH3/EPHA2/DSP/EVPL/AQP3/CNFN/MAP2K1/PPL/ANXA1/SFN	11
greenyellow.GO:0010035	GO:0010035	response to inorganic substance	15/149	373/16119	1.93442e-06	0.000340309	0.000272385	CD9/MT2A/MT1X/MT1G/NDRG1/MT1E/NFE2L2/S100A16/AREG/AQP3/S100A9/MT1F/ANXA1/FOSL1/S100A8	15
greenyellow.GO:0016337	GO:0016337	single organismal cell-cell adhesion	14/149	328/16119	2.16808e-06	0.000354171	0.00028348	PTPRU/PERP/CDH3/HSPB1/DSP/PKP3/DSC2/ADAM8/S100A9/MAP2K1/PVRL1/IL1RN/MPZL2/S100A8	14
greenyellow.GO:0071276	GO:0071276	cellular response to cadmium ion	4/149	14/16119	6.53164e-06	0.000995858	0.00079709	MT1X/MT1G/MT1E/MT1F	4
greenyellow.GO:1990267	GO:1990267	response to transition metal nanoparticle	7/149	82/16119	1.06634e-05	0.0015242	0.00121998	MT2A/MT1X/MT1G/MT1E/S100A9/MT1F/S100A8	7
greenyellow.GO:0001704	GO:0001704	formation of primary germ layer	8/149	115/16119	1.13362e-05	0.00152506	0.00122066	EPHA2/FOXC1/ITGB4/LAMA3/LAMB3/DUSP5/ITGA3/DUSP6	8
greenyellow.GO:0045216	GO:0045216	cell-cell junction organization	10/149	198/16119	1.54926e-05	0.00196842	0.00157553	PVRL4/PERP/CD9/CDH3/DSP/PKP3/PXN/GJB2/RHOD/PVRL1	10
greenyellow.GO:0051384	GO:0051384	response to glucocorticoid	8/149	129/16119	2.62039e-05	0.00303989	0.00243314	PTPRU/ALDH3A1/AREG/MAP2K1/ANXA1/IL1RN/KRAS/FOSL1	8
greenyellow.GO:0071900	GO:0071900	regulation of protein serine/threonine kinase activity	14/149	409/16119	2.65841e-05	0.00303989	0.00243314	MDFI/HSPB1/PXN/PIM1/TGFA/MAP3K6/DUSP5/ADAM8/MAP2K1/DUSP6/IL1RN/KRAS/SFN/CDKN2B	14
greenyellow.GO:0007369	GO:0007369	gastrulation	9/149	172/16119	3.15992e-05	0.00344131	0.00275444	EPHA2/FOXC1/ITGB4/LAMA3/LAMB3/DUSP5/ITGA3/DUSP6/IL1RN	9
greenyellow.GO:0002544	GO:0002544	chronic inflammatory response	4/149	21/16119	3.71333e-05	0.00386017	0.0030897	S100A9/UNC13D/IL1RN/S100A8	4
greenyellow.GO:0031960	GO:0031960	response to corticosteroid	8/149	139/16119	4.47833e-05	0.00445302	0.00356422	PTPRU/ALDH3A1/AREG/MAP2K1/ANXA1/IL1RN/KRAS/FOSL1	8
greenyellow.GO:0030155	GO:0030155	regulation of cell adhesion	12/149	331/16119	5.9116e-05	0.00563326	0.00450889	EMP2/IL18/EPHA2/EPHA1/LAMA3/TACSTD2/ADAM8/RHOD/MAP2K1/PLAU/ITGA3/IL1RN	12
greenyellow.GO:0070488	GO:0070488	neutrophil aggregation	2/149	2/16119	8.48787e-05	0.00750265	0.00600516	S100A9/S100A8	2
greenyellow.GO:0031424	GO:0031424	keratinization	5/149	49/16119	8.67096e-05	0.00750265	0.00600516	CDH3/EVPL/CNFN/PPL/SFN	5
greenyellow.GO:0002523	GO:0002523	leukocyte migration involved in inflammatory response	3/149	10/16119	8.85753e-05	0.00750265	0.00600516	ADAM8/S100A9/S100A8	3
greenyellow.GO:0010038	GO:0010038	response to metal ion	10/149	249/16119	0.00010779	0.0088041	0.00704684	MT2A/MT1X/MT1G/NDRG1/MT1E/S100A16/AQP3/S100A9/MT1F/S100A8	10
greenyellow.GO:0030032	GO:0030032	lamellipodium assembly	5/149	52/16119	0.000115579	0.00911479	0.00729552	ABLIM1/EPHA2/PXN/RHOD/VAV2	5
greenyellow.GO:0045682	GO:0045682	regulation of epidermis development	5/149	53/16119	0.000126676	0.0096569	0.00772943	PPARD/NAB2/CDH3/AQP3/SFN	5
greenyellow.GO:0045926	GO:0045926	negative regulation of growth	9/149	211/16119	0.000152626	0.0112598	0.00901244	PPARD/PTK6/SEMA3F/MT2A/MT1X/MT1G/MT1E/MT1F/CDA	9
greenyellow.GO:0043405	GO:0043405	regulation of MAP kinase activity	10/149	267/16119	0.000190495	0.0136144	0.0108971	MDFI/PXN/TGFA/MAP3K6/DUSP5/ADAM8/MAP2K1/DUSP6/IL1RN/KRAS	10
greenyellow.GO:0097581	GO:0097581	lamellipodium organization	5/149	59/16119	0.000211385	0.0146496	0.0117256	ABLIM1/EPHA2/PXN/RHOD/VAV2	5
greenyellow.GO:0031589	GO:0031589	cell-substrate adhesion	10/149	275/16119	0.000241587	0.0162503	0.0130068	PPARD/EMP2/EPHA1/ITGB4/PXN/TACSTD2/COL17A1/RHOD/PLAU/ITGA3	10
greenyellow.GO:0007160	GO:0007160	cell-matrix adhesion	8/149	182/16119	0.00029126	0.0186055	0.0148919	EMP2/EPHA1/ITGB4/PXN/COL17A1/RHOD/PLAU/ITGA3	8
greenyellow.GO:0051090	GO:0051090	regulation of sequence-specific DNA binding transcription factor activity	11/149	336/16119	0.000292871	0.0186055	0.0148919	BHLHE40/PIM1/RIPK4/FZD6/CTNNBIP1/ADAM8/S100A9/TRIM8/KRAS/FOSL1/S100A8	11
greenyellow.GO:0097186	GO:0097186	amelogenesis	3/149	15/16119	0.000324633	0.0189139	0.0151388	PERP/ITGB4/PVRL1	3
greenyellow.GO:0046686	GO:0046686	response to cadmium ion	4/149	36/16119	0.000328156	0.0189139	0.0151388	MT1X/MT1G/MT1E/MT1F	4
greenyellow.GO:0007272	GO:0007272	ensheathment of neurons	6/149	101/16119	0.000347347	0.0189139	0.0151388	PPARD/CD9/NAB2/NDRG1/KLK6/RARG	6
greenyellow.GO:0008366	GO:0008366	axon ensheathment	6/149	101/16119	0.000347347	0.0189139	0.0151388	PPARD/CD9/NAB2/NDRG1/KLK6/RARG	6
greenyellow.GO:0051017	GO:0051017	actin filament bundle assembly	6/149	101/16119	0.000347347	0.0189139	0.0151388	EPHA1/TACSTD2/TNFAIP1/RHOD/LIMK1/FSCN1	6
greenyellow.GO:0061572	GO:0061572	actin filament bundle organization	6/149	101/16119	0.000347347	0.0189139	0.0151388	EPHA1/TACSTD2/TNFAIP1/RHOD/LIMK1/FSCN1	6
greenyellow.GO:1903034	GO:1903034	regulation of response to wounding	11/149	344/16119	0.000357673	0.0190232	0.0152263	PPARD/IL18/NT5E/NFE2L2/ADAM8/S100A9/ANXA2/PLAU/ANXA1/VAV2/S100A8	11
greenyellow.GO:0034332	GO:0034332	adherens junction organization	6/149	103/16119	0.000386012	0.0200639	0.0160592	PVRL4/CDH3/DSP/PXN/RHOD/PVRL1	6
greenyellow.GO:0050673	GO:0050673	epithelial cell proliferation	10/149	295/16119	0.000421621	0.0214277	0.0171508	PPARD/CAV2/CDH3/EPHA2/TACSTD2/ECM1/TGFA/AREG/SFN/CDKN2B	10
greenyellow.GO:0043406	GO:0043406	positive regulation of MAP kinase activity	8/149	194/16119	0.000446771	0.0222123	0.0177788	MDFI/PXN/TGFA/MAP3K6/ADAM8/MAP2K1/IL1RN/KRAS	8
greenyellow.GO:0002009	GO:0002009	morphogenesis of an epithelium	12/149	415/16119	0.000479563	0.0230118	0.0184188	EPHA2/LIF/PXN/TACSTD2/RIPK4/FZD6/RAB10/CTNNBIP1/AREG/PLXNA1/RARG/KRAS	12
greenyellow.GO:0040013	GO:0040013	negative regulation of locomotion	8/149	197/16119	0.000494669	0.0230118	0.0184188	PPARD/PTPRU/CNN2/SEMA3F/EPHA1/TACSTD2/TRIM8/IL1RN	8
greenyellow.GO:0036017	GO:0036017	response to erythropoietin	2/149	4/16119	0.0005031	0.0230118	0.0184188	MT2A/MT1X	2
greenyellow.GO:0036018	GO:0036018	cellular response to erythropoietin	2/149	4/16119	0.0005031	0.0230118	0.0184188	MT2A/MT1X	2
greenyellow.GO:0006820	GO:0006820	anion transport	13/149	483/16119	0.000549772	0.0246535	0.0197328	PPARD/SLC3A2/MFSD10/SLC2A1/ANO1/SLC20A1/SLC7A5/LRRC8A/ANXA1/CLIC3/CA12/SLC4A11/IL1RN	13
greenyellow.GO:0071902	GO:0071902	positive regulation of protein serine/threonine kinase activity	9/149	254/16119	0.000597093	0.0257813	0.0206355	MDFI/PXN/PIM1/TGFA/MAP3K6/ADAM8/MAP2K1/IL1RN/KRAS	9
greenyellow.GO:0052547	GO:0052547	regulation of peptidase activity	11/149	366/16119	0.000601009	0.0257813	0.0206355	SLPI/CAST/PERP/PI3/SIAH2/ECM1/S100A9/CSTB/SERPINB1/SFN/S100A8	11
greenyellow.GO:0034109	GO:0034109	homotypic cell-cell adhesion	5/149	74/16119	0.000608742	0.0257813	0.0206355	PTPRU/HSPB1/S100A9/MAP2K1/S100A8	5
greenyellow.GO:0030198	GO:0030198	extracellular matrix organization	11/149	371/16119	0.000672291	0.0279551	0.0223754	FOXC1/ITGB4/LAMA3/PLEC/LAMB3/COL17A1/LAMC2/ADAM8/CAPN1/ANXA2/ITGA3	11
greenyellow.GO:0043062	GO:0043062	extracellular structure organization	11/149	372/16119	0.000687361	0.0280713	0.0224684	FOXC1/ITGB4/LAMA3/PLEC/LAMB3/COL17A1/LAMC2/ADAM8/CAPN1/ANXA2/ITGA3	11
greenyellow.GO:2000765	GO:2000765	regulation of cytoplasmic translation	2/149	5/16119	0.000833409	0.0334387	0.0267645	ZNF385A/YBX3	2
greenyellow.GO:0097193	GO:0097193	intrinsic apoptotic signaling pathway	9/149	267/16119	0.00085175	0.0335854	0.0268819	PERP/ZNF385A/EPHA2/YBX3/HSPB1/NFE2L2/S100A9/SFN/S100A8	9
greenyellow.GO:2001242	GO:2001242	regulation of intrinsic apoptotic signaling pathway	6/149	123/16119	0.000986664	0.0382458	0.0306121	ZNF385A/YBX3/HSPB1/NFE2L2/S100A9/S100A8	6
greenyellow.GO:0051092	GO:0051092	positive regulation of NF-kappaB transcription factor activity	6/149	124/16119	0.00102906	0.0392243	0.0313953	RIPK4/ADAM8/S100A9/TRIM8/KRAS/S100A8	6
greenyellow.GO:0022617	GO:0022617	extracellular matrix disassembly	6/149	125/16119	0.00107284	0.0402227	0.0321944	LAMA3/LAMB3/COL17A1/LAMC2/ADAM8/CAPN1	6
greenyellow.GO:0010466	GO:0010466	negative regulation of peptidase activity	8/149	225/16119	0.00117511	0.0433464	0.0346947	SLPI/CAST/PI3/SIAH2/ECM1/CSTB/SERPINB1/SFN	8
greenyellow.GO:0032808	GO:0032808	lacrimal gland development	2/149	6/16119	0.00124253	0.0451057	0.0361029	FOXC1/RARG	2
grey60.GO:0006337	GO:0006337	nucleosome disassembly	7/427	17/16119	1.34754e-07	0.000213787	0.000195464	SMARCD2/SMARCA4/SMARCB1/HIST3H2A/SET/HMGA1/SMARCD1	7
grey60.GO:0032986	GO:0032986	protein-DNA complex disassembly	7/427	17/16119	1.34754e-07	0.000213787	0.000195464	SMARCD2/SMARCA4/SMARCB1/HIST3H2A/SET/HMGA1/SMARCD1	7
grey60.GO:0031498	GO:0031498	chromatin disassembly	7/427	18/16119	2.15493e-07	0.00022792	0.000208386	SMARCD2/SMARCA4/SMARCB1/HIST3H2A/SET/HMGA1/SMARCD1	7
grey60.GO:0046364	GO:0046364	monosaccharide biosynthetic process	12/427	89/16119	3.84345e-06	0.00269465	0.0024637	PGAM1/SLC25A1/GPI/G6PC3/ALDOA/KAT2A/SESN2/TKT/GAPDH/WDR5/TPI1/ENO1	12
grey60.GO:0008380	GO:0008380	RNA splicing	25/427	346/16119	5.99468e-06	0.00269465	0.0024637	TSEN54/FASTK/CPSF1/HNRNPA0/EIF4A3/PUF60/PHF5A/DDX39A/WDR77/XAB2/PRPF4/GTF2F1/PCBP1/RBM10/SART1/SNRPC/YBX1/RNPS1/NHP2L1/SNRPD3/DDX41/THOC6/POLR2G/ALYREF/LSM4	25
grey60.GO:0006094	GO:0006094	gluconeogenesis	11/427	79/16119	7.08889e-06	0.00269465	0.0024637	PGAM1/SLC25A1/GPI/G6PC3/ALDOA/KAT2A/SESN2/GAPDH/WDR5/TPI1/ENO1	11
grey60.GO:0010498	GO:0010498	proteasomal protein catabolic process	22/427	284/16119	7.28119e-06	0.00269465	0.0024637	UBE2I/GIPC1/STUB1/DVL1/PSME3/RAD23B/RNF187/FBXW5/AURKB/ANAPC11/PSMC3/FBXL19/AKT1/KEAP1/RAD23A/CDC34/PSMC5/USP5/RNF126/PSMB7/PSMB2/PSMD2	22
grey60.GO:0043161	GO:0043161	proteasome-mediated ubiquitin-dependent protein catabolic process	21/427	265/16119	8.28727e-06	0.00269465	0.0024637	UBE2I/GIPC1/STUB1/DVL1/PSME3/RAD23B/RNF187/FBXW5/AURKB/ANAPC11/PSMC3/FBXL19/AKT1/RAD23A/CDC34/PSMC5/USP5/RNF126/PSMB7/PSMB2/PSMD2	21
grey60.GO:0000377	GO:0000377	RNA splicing, via transesterification reactions with bulged adenosine as nucleophile	19/427	224/16119	8.49244e-06	0.00269465	0.0024637	CPSF1/HNRNPA0/EIF4A3/PHF5A/DDX39A/WDR77/XAB2/PRPF4/GTF2F1/PCBP1/SART1/SNRPC/YBX1/RNPS1/NHP2L1/SNRPD3/DDX41/POLR2G/ALYREF	19
grey60.GO:0000398	GO:0000398	mRNA splicing, via spliceosome	19/427	224/16119	8.49244e-06	0.00269465	0.0024637	CPSF1/HNRNPA0/EIF4A3/PHF5A/DDX39A/WDR77/XAB2/PRPF4/GTF2F1/PCBP1/SART1/SNRPC/YBX1/RNPS1/NHP2L1/SNRPD3/DDX41/POLR2G/ALYREF	19
grey60.GO:0006333	GO:0006333	chromatin assembly or disassembly	14/427	132/16119	1.0788e-05	0.00284252	0.0025989	SMARCD2/SMARCA4/HIST1H1E/NOC2L/DAXX/ASF1B/SMARCB1/HIST3H2A/H2AFX/H1FX/SET/HMGA1/SMARCD1/PARP10	14
grey60.GO:0019319	GO:0019319	hexose biosynthetic process	11/427	83/16119	1.15154e-05	0.00284252	0.0025989	PGAM1/SLC25A1/GPI/G6PC3/ALDOA/KAT2A/SESN2/GAPDH/WDR5/TPI1/ENO1	11
grey60.GO:0000375	GO:0000375	RNA splicing, via transesterification reactions	19/427	229/16119	1.1646e-05	0.00284252	0.0025989	CPSF1/HNRNPA0/EIF4A3/PHF5A/DDX39A/WDR77/XAB2/PRPF4/GTF2F1/PCBP1/SART1/SNRPC/YBX1/RNPS1/NHP2L1/SNRPD3/DDX41/POLR2G/ALYREF	19
grey60.GO:0022613	GO:0022613	ribonucleoprotein complex biogenesis	21/427	284/16119	2.36383e-05	0.00535745	0.00489828	EIF3B/EIF4A3/TSR3/DDX56/NOA1/RRP9/WDR77/EXOSC4/ERAL1/MRPL10/NHP2/NPM3/SART1/RRS1/SURF6/NOC4L/SNRPC/NHP2L1/SNRPD3/MRTO4/EIF3I	21
grey60.GO:1903320	GO:1903320	regulation of protein modification by small protein conjugation or removal	18/427	227/16119	3.6137e-05	0.00764418	0.00698902	UBE2L3/STUB1/PSME3/TICAM1/DAXX/HMG20B/ANAPC11/PSMC3/STRA13/MUL1/SUMO3/VPS28/PSMC5/PSMB7/PSMB2/PARP10/AIMP2/PSMD2	18
grey60.GO:0042254	GO:0042254	ribosome biogenesis	15/427	171/16119	5.09636e-05	0.0101067	0.0092405	EIF4A3/TSR3/DDX56/NOA1/RRP9/EXOSC4/ERAL1/MRPL10/NHP2/NPM3/RRS1/SURF6/NOC4L/NHP2L1/MRTO4	15
grey60.GO:0034728	GO:0034728	nucleosome organization	12/427	117/16119	6.36836e-05	0.0118864	0.0108676	SMARCD2/SMARCA4/HIST1H1E/DAXX/ASF1B/SMARCB1/HIST3H2A/H2AFX/H1FX/SET/HMGA1/SMARCD1	12
grey60.GO:0006511	GO:0006511	ubiquitin-dependent protein catabolic process	27/427	453/16119	7.88036e-05	0.0135086	0.0123508	UBE2I/GIPC1/UBE2L3/STUB1/DVL1/PSME3/RAD23B/RNF187/RNF40/FBXW5/AURKB/ANAPC11/PSMC3/FBXL14/SUMO3/VPS28/FBXL19/AKT1/RAD23A/CDC34/PSMC5/USP5/RNF126/PSMB7/PSMB2/SQSTM1/PSMD2	27
grey60.GO:1903322	GO:1903322	positive regulation of protein modification by small protein conjugation or removal	14/427	158/16119	8.08899e-05	0.0135086	0.0123508	UBE2L3/STUB1/PSME3/TICAM1/ANAPC11/PSMC3/STRA13/MUL1/SUMO3/PSMC5/PSMB7/PSMB2/AIMP2/PSMD2	14
grey60.GO:0051205	GO:0051205	protein insertion into membrane	7/427	41/16119	8.98988e-05	0.0142624	0.0130401	UBL4A/BID/ASNA1/OXA1L/DYNLL2/AKT1/NMT1	7
grey60.GO:0043241	GO:0043241	protein complex disassembly	16/427	202/16119	9.84306e-05	0.0148724	0.0135977	SMARCD2/SMARCA4/DDIT4/AURKB/DMTN/SMARCB1/HIST3H2A/SET/ICT1/EIF5A/HMGA1/SMARCD1/GAS2L1/UPF1/STMN1/MID1IP1	16
grey60.GO:0019941	GO:0019941	modification-dependent protein catabolic process	27/427	462/16119	0.000109339	0.0157696	0.0144181	UBE2I/GIPC1/UBE2L3/STUB1/DVL1/PSME3/RAD23B/RNF187/RNF40/FBXW5/AURKB/ANAPC11/PSMC3/FBXL14/SUMO3/VPS28/FBXL19/AKT1/RAD23A/CDC34/PSMC5/USP5/RNF126/PSMB7/PSMB2/SQSTM1/PSMD2	27
grey60.GO:0043632	GO:0043632	modification-dependent macromolecule catabolic process	27/427	466/16119	0.000126028	0.0173863	0.0158962	UBE2I/GIPC1/UBE2L3/STUB1/DVL1/PSME3/RAD23B/RNF187/RNF40/FBXW5/AURKB/ANAPC11/PSMC3/FBXL14/SUMO3/VPS28/FBXL19/AKT1/RAD23A/CDC34/PSMC5/USP5/RNF126/PSMB7/PSMB2/SQSTM1/PSMD2	27
grey60.GO:0031398	GO:0031398	positive regulation of protein ubiquitination	13/427	146/16119	0.000137471	0.0181748	0.0166171	UBE2L3/STUB1/PSME3/TICAM1/ANAPC11/PSMC3/STRA13/SUMO3/PSMC5/PSMB7/PSMB2/AIMP2/PSMD2	13
grey60.GO:0000209	GO:0000209	protein polyubiquitination	15/427	188/16119	0.000148898	0.0188981	0.0172784	UBE2L3/STUB1/PSME3/RNF187/SHARPIN/ANAPC11/PSMC3/RUSC1/CDC34/PSMC5/RNF126/PSMB7/PSMB2/PARP10/PSMD2	15
grey60.GO:0051603	GO:0051603	proteolysis involved in cellular protein catabolic process	28/427	499/16119	0.000162373	0.0192166	0.0175696	UBE2I/GIPC1/UBE2L3/STUB1/DVL1/PSME3/RAD23B/RNF187/RNF40/FBXW5/AURKB/ANAPC11/PSMC3/FBXL14/SUMO3/VPS28/FBXL19/AKT1/KEAP1/RAD23A/CDC34/PSMC5/USP5/RNF126/PSMB7/PSMB2/SQSTM1/PSMD2	28
grey60.GO:0031396	GO:0031396	regulation of protein ubiquitination	16/427	211/16119	0.00016352	0.0192166	0.0175696	UBE2L3/STUB1/PSME3/TICAM1/DAXX/ANAPC11/PSMC3/STRA13/SUMO3/VPS28/PSMC5/PSMB7/PSMB2/PARP10/AIMP2/PSMD2	16
grey60.GO:0032984	GO:0032984	macromolecular complex disassembly	16/427	212/16119	0.000172665	0.0195667	0.0178897	SMARCD2/SMARCA4/DDIT4/AURKB/DMTN/SMARCB1/HIST3H2A/SET/ICT1/EIF5A/HMGA1/SMARCD1/GAS2L1/UPF1/STMN1/MID1IP1	16
grey60.GO:0071824	GO:0071824	protein-DNA complex subunit organization	13/427	150/16119	0.000180288	0.0197259	0.0180353	SMARCD2/SMARCA4/HIST1H1E/DAXX/ASF1B/SMARCB1/STRA13/HIST3H2A/H2AFX/H1FX/SET/HMGA1/SMARCD1	13
grey60.GO:0006397	GO:0006397	mRNA processing	25/427	427/16119	0.000190224	0.0201194	0.018395	ZC3H3/TSEN54/CPSF1/HNRNPA0/EIF4A3/PUF60/PHF5A/DDX39A/WDR77/XAB2/PRPF4/GTF2F1/PCBP1/RBM10/SART1/SNRPC/YBX1/RNPS1/NHP2L1/SNRPD3/DDX41/THOC6/POLR2G/ALYREF/LSM4	25
grey60.GO:0006260	GO:0006260	DNA replication	20/427	306/16119	0.000200213	0.0204928	0.0187364	REPIN1/RECQL4/MEN1/PHB/CHTF8/CHRAC1/TONSL/CIZ1/CDK9/RFC2/STRA13/SET/RMI2/TK1/POLE3/CDC34/HMGA1/UPF1/RNASEH2A/ALYREF	20
grey60.GO:0016051	GO:0016051	carbohydrate biosynthetic process	15/427	195/16119	0.000222484	0.0220607	0.0201699	PGAM1/SLC25A1/COLGALT1/GPI/G6PC3/ALDOA/KAT2A/SESN2/AKT1/ISYNA1/TKT/GAPDH/WDR5/TPI1/ENO1	15
grey60.GO:0006006	GO:0006006	glucose metabolic process	16/427	221/16119	0.000277118	0.0266453	0.0243617	DCXR/PGAM1/SLC25A1/PFKL/GPI/G6PC3/ALDOA/KAT2A/PGLS/SESN2/AKT1/TKT/GAPDH/WDR5/TPI1/ENO1	16
grey60.GO:0051084	GO:0051084	de novo' posttranslational protein folding	7/427	49/16119	0.000286288	0.0267175	0.0244276	TUBB4B/TUBA1B/TUBA1C/TOR3A/TUBB2A/TOR1B/CCT7	7
grey60.GO:0006281	GO:0006281	DNA repair	24/427	416/16119	0.000315982	0.028646	0.0261909	RECQL4/STUB1/MEN1/RAD23B/TONSL/XAB2/CDK9/RFC2/RHNO1/MPG/APEX1/SMARCB1/STRA13/HIST3H2A/H2AFX/NABP2/MCRS1/RAD23A/TMEM161A/HMGA1/POLR2G/UPF1/RNASEH2A/FOXM1	24
grey60.GO:0006732	GO:0006732	coenzyme metabolic process	15/427	204/16119	0.000361754	0.0318846	0.0291518	DGAT1/TECR/ADCK3/SLC5A6/NAPRT/DCXR/PGAM1/FLAD1/SLC25A1/COASY/PGLS/FPGS/ACOT7/TKT/TPI1	15
grey60.GO:0006096	GO:0006096	glycolytic process	8/427	67/16119	0.000377205	0.0323479	0.0295755	PGAM1/PFKL/GPI/DDIT4/ALDOA/GAPDH/TPI1/ENO1	8
grey60.GO:0006098	GO:0006098	pentose-phosphate shunt	4/427	14/16119	0.000393572	0.0328633	0.0300467	PGAM1/PGLS/TKT/TPI1	4
grey60.GO:0006740	GO:0006740	NADPH regeneration	4/427	15/16119	0.000525517	0.0417945	0.0382124	PGAM1/PGLS/TKT/TPI1	4
grey60.GO:0006458	GO:0006458	de novo' protein folding	7/427	54/16119	0.000526877	0.0417945	0.0382124	TUBB4B/TUBA1B/TUBA1C/TOR3A/TUBB2A/TOR1B/CCT7	7
grey60.GO:0043687	GO:0043687	post-translational protein modification	15/427	213/16119	0.000570155	0.0441244	0.0403427	UBE2I/GPAA1/DOLPP1/PREB/MOGS/DPM2/PRKCSH/DOLK/DDOST/B4GALT3/ST6GALNAC4/B4GALT2/SUMO3/EIF5A/PIGS	15
grey60.GO:0006406	GO:0006406	mRNA export from nucleus	8/427	72/16119	0.000617047	0.0466164	0.0426211	ZC3H3/CPSF1/DDX39A/EIF5A/RNPS1/THOC6/UPF1/ALYREF	8
grey60.GO:0051186	GO:0051186	cofactor metabolic process	17/427	263/16119	0.000670299	0.0494618	0.0452226	DGAT1/TECR/ADCK3/SLC5A6/NAPRT/DCXR/PGAM1/FLAD1/SLC25A1/SLC25A39/COASY/HMOX2/PGLS/FPGS/ACOT7/TKT/TPI1	17
lightcyan.GO:0002694	GO:0002694	regulation of leukocyte activation	14/98	381/16119	7.21978e-08	0.000115777	8.47658e-05	CD2/CD3D/GPR183/CD3E/ITGAL/VCAM1/STAT5A/SLAMF7/CCL19/CD37/MZB1/IL27RA/CCL21/TNFAIP3	14
lightcyan.GO:0051249	GO:0051249	regulation of lymphocyte activation	13/98	336/16119	1.21551e-07	0.000115777	8.47658e-05	CD2/CD3D/GPR183/CD3E/ITGAL/VCAM1/STAT5A/SLAMF7/CCL19/MZB1/IL27RA/CCL21/TNFAIP3	13
lightcyan.GO:0050865	GO:0050865	regulation of cell activation	14/98	411/16119	1.8311e-07	0.000116275	8.51299e-05	CD2/CD3D/GPR183/CD3E/ITGAL/VCAM1/STAT5A/SLAMF7/CCL19/CD37/MZB1/IL27RA/CCL21/TNFAIP3	14
lightcyan.GO:0009617	GO:0009617	response to bacterium	13/98	408/16119	1.10637e-06	0.000484123	0.000354448	LY86/VCAM1/CXCL13/IL27RA/CSF2RB/ERAP1/NFKB1/WASL/IRF8/NFKBIA/IGJ/TNFAIP3/LTF	13
lightcyan.GO:0001817	GO:0001817	regulation of cytokine production	14/98	483/16119	1.27066e-06	0.000484123	0.000354448	IFI16/CD2/CD3E/STAT5A/POLR3GL/CCL19/IL27RA/LTB/NFKB1/IRF8/NFKBIA/ARRB2/TNFAIP3/LTF	14
lightcyan.GO:0098542	GO:0098542	defense response to other organism	12/98	379/16119	3.15915e-06	0.00100303	0.000734364	TRIM22/IFI16/SLFN11/CXCL13/CD37/APOBEC3C/IL27RA/COTL1/IRF8/IGJ/TNFAIP3/LTF	12
lightcyan.GO:0042110	GO:0042110	T cell activation	12/98	395/16119	4.82564e-06	0.00131326	0.000961499	CD2/CD3D/CD3E/ITGAL/VCAM1/CD48/STAT5A/CCL19/CXCR4/RAB27A/CD7/CCL21	12
lightcyan.GO:0032655	GO:0032655	regulation of interleukin-12 production	5/98	44/16119	6.74545e-06	0.00159856	0.00117038	CCL19/LTB/NFKB1/IRF8/ARRB2	5
lightcyan.GO:0032615	GO:0032615	interleukin-12 production	5/98	45/16119	7.55226e-06	0.00159856	0.00117038	CCL19/LTB/NFKB1/IRF8/ARRB2	5
lightcyan.GO:0070663	GO:0070663	regulation of leukocyte proliferation	8/98	177/16119	1.22464e-05	0.00233295	0.00170806	GPR183/CD3E/ITGAL/VCAM1/STAT5A/CCL19/MZB1/TNFAIP3	8
lightcyan.GO:0050900	GO:0050900	leukocyte migration	10/98	300/16119	1.41719e-05	0.00245432	0.00179692	CD2/SELPLG/ITGAL/VCAM1/CD48/CCL19/CXCL13/CXCR4/SELL/CCL21	10
lightcyan.GO:0070661	GO:0070661	leukocyte proliferation	9/98	242/16119	1.6455e-05	0.00261224	0.00191254	GPR183/CD3E/ITGAL/VCAM1/STAT5A/CCL19/CXCR4/MZB1/TNFAIP3	9
lightcyan.GO:0002696	GO:0002696	positive regulation of leukocyte activation	9/98	255/16119	2.48916e-05	0.00364758	0.00267056	CD2/CD3D/GPR183/CD3E/ITGAL/VCAM1/STAT5A/CCL19/CCL21	9
lightcyan.GO:0050867	GO:0050867	positive regulation of cell activation	9/98	264/16119	3.26801e-05	0.00444683	0.00325573	CD2/CD3D/GPR183/CD3E/ITGAL/VCAM1/STAT5A/CCL19/CCL21	9
lightcyan.GO:0001819	GO:0001819	positive regulation of cytokine production	9/98	278/16119	4.88651e-05	0.00548653	0.00401694	IFI16/CD2/CD3E/POLR3GL/CCL19/IL27RA/NFKB1/IRF8/NFKBIA	9
lightcyan.GO:0002253	GO:0002253	activation of immune response	11/98	424/16119	5.25761e-05	0.00548653	0.00401694	IFI16/FYB/CD3D/LCP2/CD3E/NFKB1/WASL/NFKBIA/ARRB2/TNFAIP3/LTF	11
lightcyan.GO:0048260	GO:0048260	positive regulation of receptor-mediated endocytosis	4/98	35/16119	5.8206e-05	0.00548653	0.00401694	CCL19/WASL/CCL21/ARRB2	4
lightcyan.GO:0050852	GO:0050852	T cell receptor signaling pathway	6/98	111/16119	5.85859e-05	0.00548653	0.00401694	FYB/CD3D/LCP2/CD3E/NFKB1/NFKBIA	6
lightcyan.GO:0050671	GO:0050671	positive regulation of lymphocyte proliferation	6/98	113/16119	6.47386e-05	0.00548653	0.00401694	GPR183/CD3E/ITGAL/VCAM1/STAT5A/CCL19	6
lightcyan.GO:0032946	GO:0032946	positive regulation of mononuclear cell proliferation	6/98	114/16119	6.80027e-05	0.00548653	0.00401694	GPR183/CD3E/ITGAL/VCAM1/STAT5A/CCL19	6
lightcyan.GO:0071222	GO:0071222	cellular response to lipopolysaccharide	6/98	115/16119	7.1397e-05	0.00548653	0.00401694	LY86/NFKB1/IRF8/NFKBIA/TNFAIP3/LTF	6
lightcyan.GO:0070665	GO:0070665	positive regulation of leukocyte proliferation	6/98	117/16119	7.85909e-05	0.00548653	0.00401694	GPR183/CD3E/ITGAL/VCAM1/STAT5A/CCL19	6
lightcyan.GO:0006959	GO:0006959	humoral immune response	7/98	170/16119	7.92608e-05	0.00548653	0.00401694	LY86/GPR183/CXCL13/CD37/BLNK/IGJ/LTF	7
lightcyan.GO:0032496	GO:0032496	response to lipopolysaccharide	8/98	230/16119	7.94327e-05	0.00548653	0.00401694	LY86/VCAM1/CSF2RB/NFKB1/IRF8/NFKBIA/TNFAIP3/LTF	8
lightcyan.GO:0046651	GO:0046651	lymphocyte proliferation	8/98	230/16119	7.94327e-05	0.00548653	0.00401694	GPR183/CD3E/ITGAL/VCAM1/STAT5A/CCL19/CXCR4/MZB1	8
lightcyan.GO:0050670	GO:0050670	regulation of lymphocyte proliferation	7/98	171/16119	8.22375e-05	0.00548653	0.00401694	GPR183/CD3E/ITGAL/VCAM1/STAT5A/CCL19/MZB1	7
lightcyan.GO:0032943	GO:0032943	mononuclear cell proliferation	8/98	232/16119	8.43794e-05	0.00548653	0.00401694	GPR183/CD3E/ITGAL/VCAM1/STAT5A/CCL19/CXCR4/MZB1	8
lightcyan.GO:0032944	GO:0032944	regulation of mononuclear cell proliferation	7/98	172/16119	8.53049e-05	0.00548653	0.00401694	GPR183/CD3E/ITGAL/VCAM1/STAT5A/CCL19/MZB1	7
lightcyan.GO:0009615	GO:0009615	response to virus	9/98	301/16119	9.00135e-05	0.00548653	0.00401694	TRIM22/IFI16/SLFN11/CCL19/CD37/CXCR4/APOBEC3C/PIM2/TNFAIP3	9
lightcyan.GO:0002757	GO:0002757	immune response-activating signal transduction	10/98	374/16119	9.15418e-05	0.00548653	0.00401694	FYB/CD3D/LCP2/CD3E/NFKB1/WASL/NFKBIA/ARRB2/TNFAIP3/LTF	10
lightcyan.GO:0032680	GO:0032680	regulation of tumor necrosis factor production	5/98	75/16119	9.2387e-05	0.00548653	0.00401694	CD2/CCL19/ARRB2/TNFAIP3/LTF	5
lightcyan.GO:0071219	GO:0071219	cellular response to molecule of bacterial origin	6/98	121/16119	9.47107e-05	0.00548653	0.00401694	LY86/NFKB1/IRF8/NFKBIA/TNFAIP3/LTF	6
lightcyan.GO:0051251	GO:0051251	positive regulation of lymphocyte activation	8/98	236/16119	9.50422e-05	0.00548653	0.00401694	CD3D/GPR183/CD3E/ITGAL/VCAM1/STAT5A/CCL19/CCL21	8
lightcyan.GO:0032640	GO:0032640	tumor necrosis factor production	5/98	76/16119	9.84205e-05	0.00551444	0.00403737	CD2/CCL19/ARRB2/TNFAIP3/LTF	5
lightcyan.GO:0097026	GO:0097026	dendritic cell dendrite assembly	2/98	3/16119	0.000109331	0.00578541	0.00423576	CCL19/CCL21	2
lightcyan.GO:2000547	GO:2000547	regulation of dendritic cell dendrite assembly	2/98	3/16119	0.000109331	0.00578541	0.00423576	CCL19/CCL21	2
lightcyan.GO:0002237	GO:0002237	response to molecule of bacterial origin	8/98	244/16119	0.000119737	0.00616483	0.00451355	LY86/VCAM1/CSF2RB/NFKB1/IRF8/NFKBIA/TNFAIP3/LTF	8
lightcyan.GO:0071706	GO:0071706	tumor necrosis factor superfamily cytokine production	5/98	80/16119	0.000125638	0.00624578	0.00457282	CD2/CCL19/ARRB2/TNFAIP3/LTF	5
lightcyan.GO:0002228	GO:0002228	natural killer cell mediated immunity	4/98	43/16119	0.000132175	0.00624578	0.00457282	STAT5A/SLAMF7/RAB27A/ARRB2	4
lightcyan.GO:0042267	GO:0042267	natural killer cell mediated cytotoxicity	4/98	43/16119	0.000132175	0.00624578	0.00457282	STAT5A/SLAMF7/RAB27A/ARRB2	4
lightcyan.GO:0050870	GO:0050870	positive regulation of T cell activation	7/98	185/16119	0.000134424	0.00624578	0.00457282	CD3D/CD3E/ITGAL/VCAM1/STAT5A/CCL19/CCL21	7
lightcyan.GO:0042102	GO:0042102	positive regulation of T cell proliferation	5/98	82/16119	0.000141239	0.00640622	0.00469028	CD3E/ITGAL/VCAM1/STAT5A/CCL19	5
lightcyan.GO:0050863	GO:0050863	regulation of T cell activation	8/98	254/16119	0.000157848	0.00699304	0.00511992	CD2/CD3D/CD3E/ITGAL/VCAM1/STAT5A/CCL19/CCL21	8
lightcyan.GO:0016337	GO:0016337	single organismal cell-cell adhesion	9/98	328/16119	0.000172194	0.00745523	0.00545831	CD2/SELPLG/ITGAL/VCAM1/RAPGEF1/ZNF703/CXCL13/CCL21/NPNT	9
lightcyan.GO:0071216	GO:0071216	cellular response to biotic stimulus	6/98	137/16119	0.000187338	0.00764939	0.00560047	LY86/NFKB1/IRF8/NFKBIA/TNFAIP3/LTF	6
lightcyan.GO:0031663	GO:0031663	lipopolysaccharide-mediated signaling pathway	4/98	47/16119	0.000187514	0.00764939	0.00560047	LY86/NFKBIA/TNFAIP3/LTF	4
lightcyan.GO:0002407	GO:0002407	dendritic cell chemotaxis	3/98	19/16119	0.000196756	0.00764939	0.00560047	CCL19/CXCR4/CCL21	3
lightcyan.GO:0031664	GO:0031664	regulation of lipopolysaccharide-mediated signaling pathway	3/98	19/16119	0.000196756	0.00764939	0.00560047	LY86/TNFAIP3/LTF	3
lightcyan.GO:0050901	GO:0050901	leukocyte tethering or rolling	3/98	19/16119	0.000196756	0.00764939	0.00560047	SELPLG/VCAM1/CCL21	3
lightcyan.GO:0002521	GO:0002521	leukocyte differentiation	10/98	414/16119	0.00020956	0.00768327	0.00562527	IFI16/CD2/CD3D/GPR183/CD3E/VCAM1/STAT5A/CCL19/BLNK/LTF	10
lightcyan.GO:0060326	GO:0060326	cell chemotaxis	7/98	199/16119	0.00021079	0.00768327	0.00562527	VCAM1/CCL19/CXCL13/CXCR4/CXCL14/CCL21/ARRB2	7
lightcyan.GO:0042113	GO:0042113	B cell activation	7/98	200/16119	0.000217363	0.00768327	0.00562527	GPR183/VCAM1/STAT5A/MZB1/IL27RA/BLNK/TNFAIP3	7
lightcyan.GO:0002408	GO:0002408	myeloid dendritic cell chemotaxis	2/98	4/16119	0.000217793	0.00768327	0.00562527	CCL19/CCL21	2
lightcyan.GO:0030885	GO:0030885	regulation of myeloid dendritic cell activation	2/98	4/16119	0.000217793	0.00768327	0.00562527	CD2/CD37	2
lightcyan.GO:0050864	GO:0050864	regulation of B cell activation	5/98	91/16119	0.000230578	0.00798638	0.00584719	GPR183/STAT5A/MZB1/IL27RA/TNFAIP3	5
lightcyan.GO:0050851	GO:0050851	antigen receptor-mediated signaling pathway	6/98	143/16119	0.000236418	0.00804242	0.00588822	FYB/CD3D/LCP2/CD3E/NFKB1/NFKBIA	6
lightcyan.GO:0032609	GO:0032609	interferon-gamma production	5/98	93/16119	0.000255231	0.00847004	0.0062013	CD2/CD3E/IL27RA/IRF8/RUNX3	5
lightcyan.GO:0007159	GO:0007159	leukocyte cell-cell adhesion	4/98	51/16119	0.000257881	0.00847004	0.0062013	SELPLG/ITGAL/VCAM1/CCL21	4
lightcyan.GO:0045824	GO:0045824	negative regulation of innate immune response	3/98	21/16119	0.000267684	0.00859966	0.0062962	IFI16/ARRB2/TNFAIP3	3
lightcyan.GO:0045088	GO:0045088	regulation of innate immune response	8/98	275/16119	0.000270855	0.00859966	0.0062962	IFI16/STAT5A/ERAP1/NFKB1/NFKBIA/ARRB2/TNFAIP3/LTF	8
lightcyan.GO:0030098	GO:0030098	lymphocyte differentiation	8/98	276/16119	0.000277561	0.0086681	0.00634631	CD2/CD3D/GPR183/CD3E/VCAM1/STAT5A/CCL19/BLNK	8
lightcyan.GO:0043122	GO:0043122	regulation of I-kappaB kinase/NF-kappaB signaling	7/98	213/16119	0.000318924	0.0097992	0.00717444	TRIM22/CCL19/PIM2/NFKBIA/CCL21/TNFAIP3/LTF	7
lightcyan.GO:0045089	GO:0045089	positive regulation of innate immune response	7/98	214/16119	0.000328091	0.00992083	0.00726349	IFI16/STAT5A/NFKB1/NFKBIA/ARRB2/TNFAIP3/LTF	7
lightcyan.GO:0001768	GO:0001768	establishment of T cell polarity	2/98	5/16119	0.000361549	0.0105259	0.00770652	CCL19/CCL21	2
lightcyan.GO:0042098	GO:0042098	T cell proliferation	6/98	155/16119	0.000364678	0.0105259	0.00770652	CD3E/ITGAL/VCAM1/STAT5A/CCL19/CXCR4	6
lightcyan.GO:0070372	GO:0070372	regulation of ERK1 and ERK2 cascade	6/98	155/16119	0.000364678	0.0105259	0.00770652	GPR183/RAPGEF1/CCL19/CCL21/ARRB2/NPNT	6
lightcyan.GO:0036336	GO:0036336	dendritic cell migration	3/98	24/16119	0.00040201	0.0114303	0.00836862	CCL19/CXCR4/CCL21	3
lightcyan.GO:0098602	GO:0098602	single organism cell adhesion	9/98	372/16119	0.000435139	0.0121903	0.00892507	CD2/SELPLG/ITGAL/VCAM1/RAPGEF1/ZNF703/CXCL13/CCL21/NPNT	9
lightcyan.GO:0048259	GO:0048259	regulation of receptor-mediated endocytosis	4/98	59/16119	0.000452539	0.012494	0.00914744	CCL19/WASL/CCL21/ARRB2	4
lightcyan.GO:0002429	GO:0002429	immune response-activating cell surface receptor signaling pathway	7/98	230/16119	0.00050587	0.013672	0.0100099	FYB/CD3D/LCP2/CD3E/NFKB1/WASL/NFKBIA	7
lightcyan.GO:0032479	GO:0032479	regulation of type I interferon production	5/98	108/16119	0.00050956	0.013672	0.0100099	IFI16/POLR3GL/NFKB1/NFKBIA/TNFAIP3	5
lightcyan.GO:0001767	GO:0001767	establishment of lymphocyte polarity	2/98	6/16119	0.000540173	0.0142921	0.0104639	CCL19/CCL21	2
lightcyan.GO:0070371	GO:0070371	ERK1 and ERK2 cascade	6/98	168/16119	0.000559312	0.0145957	0.0106862	GPR183/RAPGEF1/CCL19/CCL21/ARRB2/NPNT	6
lightcyan.GO:0007249	GO:0007249	I-kappaB kinase/NF-kappaB signaling	7/98	235/16119	0.000574915	0.0146698	0.0107404	TRIM22/CCL19/PIM2/NFKBIA/CCL21/TNFAIP3/LTF	7
lightcyan.GO:0032606	GO:0032606	type I interferon production	5/98	111/16119	0.00057755	0.0146698	0.0107404	IFI16/POLR3GL/NFKB1/NFKBIA/TNFAIP3	5
lightcyan.GO:0070374	GO:0070374	positive regulation of ERK1 and ERK2 cascade	5/98	113/16119	0.000626517	0.0157041	0.0114977	GPR183/CCL19/CCL21/ARRB2/NPNT	5
lightcyan.GO:0010559	GO:0010559	regulation of glycoprotein biosynthetic process	3/98	28/16119	0.000639317	0.0158169	0.0115802	CCL19/TINF2/CCL21	3
lightcyan.GO:0002764	GO:0002764	immune response-regulating signaling pathway	10/98	481/16119	0.000682625	0.0166718	0.0122062	FYB/CD3D/LCP2/CD3E/NFKB1/WASL/NFKBIA/ARRB2/TNFAIP3/LTF	10
lightcyan.GO:0001771	GO:0001771	immunological synapse formation	2/98	7/16119	0.000753244	0.0179366	0.0131322	CCL19/CCL21	2
lightcyan.GO:0002606	GO:0002606	positive regulation of dendritic cell antigen processing and presentation	2/98	7/16119	0.000753244	0.0179366	0.0131322	CCL19/CCL21	2
lightcyan.GO:0002285	GO:0002285	lymphocyte activation involved in immune response	5/98	120/16119	0.000822708	0.0192031	0.0140594	GPR183/ITGAL/CCL19/IL27RA/RAB27A	5
lightcyan.GO:0002218	GO:0002218	activation of innate immune response	6/98	181/16119	0.000826589	0.0192031	0.0140594	IFI16/NFKB1/NFKBIA/ARRB2/TNFAIP3/LTF	6
lightcyan.GO:0030101	GO:0030101	natural killer cell activation	4/98	70/16119	0.000866368	0.0198847	0.0145585	CD2/STAT5A/SLAMF7/RAB27A	4
lightcyan.GO:0001909	GO:0001909	leukocyte mediated cytotoxicity	4/98	72/16119	0.000963136	0.0215856	0.0158038	STAT5A/SLAMF7/RAB27A/ARRB2	4
lightcyan.GO:0050777	GO:0050777	negative regulation of immune response	4/98	72/16119	0.000963136	0.0215856	0.0158038	IFI16/IL27RA/ARRB2/TNFAIP3	4
lightcyan.GO:0002468	GO:0002468	dendritic cell antigen processing and presentation	2/98	8/16119	0.00100035	0.0219041	0.016037	CCL19/CCL21	2
lightcyan.GO:0002604	GO:0002604	regulation of dendritic cell antigen processing and presentation	2/98	8/16119	0.00100035	0.0219041	0.016037	CCL19/CCL21	2
lightcyan.GO:0031295	GO:0031295	T cell costimulation	4/98	73/16119	0.00101426	0.0219565	0.0160754	CD3D/CD3E/CCL19/CCL21	4
lightcyan.GO:1903018	GO:1903018	regulation of glycoprotein metabolic process	3/98	33/16119	0.00104157	0.0220995	0.01618	CCL19/TINF2/CCL21	3
lightcyan.GO:0042129	GO:0042129	regulation of T cell proliferation	5/98	127/16119	0.00106148	0.0220995	0.01618	CD3E/ITGAL/VCAM1/STAT5A/CCL19	5
lightcyan.GO:0002697	GO:0002697	regulation of immune effector process	7/98	261/16119	0.00106433	0.0220995	0.01618	STAT5A/CCL19/CD37/MZB1/IL27RA/ARRB2/TNFAIP3	7
lightcyan.GO:0031294	GO:0031294	lymphocyte costimulation	4/98	74/16119	0.00106727	0.0220995	0.01618	CD3D/CD3E/CCL19/CCL21	4
lightcyan.GO:0032481	GO:0032481	positive regulation of type I interferon production	4/98	75/16119	0.00112219	0.0229869	0.0168297	IFI16/POLR3GL/NFKB1/NFKBIA	4
lightcyan.GO:0043551	GO:0043551	regulation of phosphatidylinositol 3-kinase activity	3/98	35/16119	0.00123853	0.0251	0.0183769	PIK3IP1/CCL19/CCL21	3
lightcyan.GO:0031665	GO:0031665	negative regulation of lipopolysaccharide-mediated signaling pathway	2/98	9/16119	0.00128107	0.0251591	0.0184201	TNFAIP3/LTF	2
lightcyan.GO:0042090	GO:0042090	interleukin-12 biosynthetic process	2/98	9/16119	0.00128107	0.0251591	0.0184201	LTB/NFKB1	2
lightcyan.GO:0045075	GO:0045075	regulation of interleukin-12 biosynthetic process	2/98	9/16119	0.00128107	0.0251591	0.0184201	LTB/NFKB1	2
lightcyan.GO:0032651	GO:0032651	regulation of interleukin-1 beta production	3/98	36/16119	0.0013452	0.0258849	0.0189515	IFI16/CCL19/ARRB2	3
lightcyan.GO:0034121	GO:0034121	regulation of toll-like receptor signaling pathway	3/98	36/16119	0.0013452	0.0258849	0.0189515	ARRB2/TNFAIP3/LTF	3
lightcyan.GO:0002274	GO:0002274	myeloid leukocyte activation	5/98	136/16119	0.00143975	0.0274273	0.0200807	CD2/LCP2/CD48/CD37/CXCR4	5
lightcyan.GO:0002637	GO:0002637	regulation of immunoglobulin production	3/98	37/16119	0.00145747	0.02749	0.0201267	CD37/MZB1/IL27RA	3
lightcyan.GO:0051607	GO:0051607	defense response to virus	6/98	204/16119	0.00152995	0.0285741	0.0209204	TRIM22/IFI16/SLFN11/CD37/APOBEC3C/TNFAIP3	6
lightcyan.GO:0032649	GO:0032649	regulation of interferon-gamma production	4/98	82/16119	0.00156343	0.0286647	0.0209868	CD2/CD3E/IL27RA/IRF8	4
lightcyan.GO:0045123	GO:0045123	cellular extravasation	3/98	38/16119	0.00157547	0.0286647	0.0209868	SELPLG/VCAM1/CCL21	3
lightcyan.GO:0006600	GO:0006600	creatine metabolic process	2/98	10/16119	0.00159499	0.0286647	0.0209868	STAT5A/SLC6A8	2
lightcyan.GO:0043089	GO:0043089	positive regulation of Cdc42 GTPase activity	2/98	10/16119	0.00159499	0.0286647	0.0209868	CCL19/RALBP1	2
lightcyan.GO:0031349	GO:0031349	positive regulation of defense response	7/98	281/16119	0.0016272	0.0289703	0.0212105	IFI16/STAT5A/NFKB1/NFKBIA/ARRB2/TNFAIP3/LTF	7
lightcyan.GO:0030433	GO:0030433	ER-associated ubiquitin-dependent protein catabolic process	3/98	39/16119	0.00169928	0.0299733	0.0219448	DERL3/UBE2J1/DNAJB9	3
lightcyan.GO:0010506	GO:0010506	regulation of autophagy	4/98	85/16119	0.00178497	0.0308302	0.0225722	IFI16/TP53INP1/PIM2/DRAM2	4
lightcyan.GO:0045807	GO:0045807	positive regulation of endocytosis	4/98	85/16119	0.00178497	0.0308302	0.0225722	CCL19/WASL/CCL21/ARRB2	4
lightcyan.GO:0002224	GO:0002224	toll-like receptor signaling pathway	5/98	143/16119	0.00179641	0.0308302	0.0225722	NFKB1/NFKBIA/ARRB2/TNFAIP3/LTF	5
lightcyan.GO:0032652	GO:0032652	regulation of interleukin-1 production	3/98	40/16119	0.00182901	0.0308341	0.0225751	IFI16/CCL19/ARRB2	3
lightcyan.GO:0032729	GO:0032729	positive regulation of interferon-gamma production	3/98	40/16119	0.00182901	0.0308341	0.0225751	CD3E/IL27RA/IRF8	3
lightcyan.GO:0043550	GO:0043550	regulation of lipid kinase activity	3/98	41/16119	0.00196476	0.0325467	0.0238289	PIK3IP1/CCL19/CCL21	3
lightcyan.GO:2000107	GO:2000107	negative regulation of leukocyte apoptotic process	3/98	41/16119	0.00196476	0.0325467	0.0238289	STAT5A/CCL19/CCL21	3
lightcyan.GO:0032611	GO:0032611	interleukin-1 beta production	3/98	42/16119	0.00210663	0.0345959	0.0253293	IFI16/CCL19/ARRB2	3
lightcyan.GO:0002579	GO:0002579	positive regulation of antigen processing and presentation	2/98	12/16119	0.00232085	0.0368436	0.0269748	CCL19/CCL21	2
lightcyan.GO:0010560	GO:0010560	positive regulation of glycoprotein biosynthetic process	2/98	12/16119	0.00232085	0.0368436	0.0269748	CCL19/CCL21	2
lightcyan.GO:0032854	GO:0032854	positive regulation of Rap GTPase activity	2/98	12/16119	0.00232085	0.0368436	0.0269748	RAPGEF1/CXCL13	2
lightcyan.GO:0033631	GO:0033631	cell-cell adhesion mediated by integrin	2/98	12/16119	0.00232085	0.0368436	0.0269748	CXCL13/NPNT	2
lightcyan.GO:0030099	GO:0030099	myeloid cell differentiation	7/98	300/16119	0.00235496	0.037076	0.027145	PIP4K2A/IFI16/ETS1/STAT5A/IRF8/NFKBIA/LTF	7
lightcyan.GO:0032663	GO:0032663	regulation of interleukin-2 production	3/98	44/16119	0.0024091	0.0376176	0.0275415	CD3E/STAT5A/TNFAIP3	3
lightcyan.GO:0042035	GO:0042035	regulation of cytokine biosynthetic process	4/98	93/16119	0.0024806	0.0381334	0.0279192	CD3E/STAT5A/LTB/NFKB1	4
lightcyan.GO:0043123	GO:0043123	positive regulation of I-kappaB kinase/NF-kappaB signaling	5/98	154/16119	0.00248217	0.0381334	0.0279192	TRIM22/CCL19/PIM2/CCL21/LTF	5
lightcyan.GO:0019221	GO:0019221	cytokine-mediated signaling pathway	8/98	389/16119	0.00254586	0.0387988	0.0284064	IL2RB/VCAM1/STAT5A/CXCR4/IL27RA/CSF2RB/IRF2/IRF8	8
lightcyan.GO:0001906	GO:0001906	cell killing	4/98	94/16119	0.00257893	0.0389909	0.028547	STAT5A/SLAMF7/RAB27A/ARRB2	4
lightcyan.GO:0043900	GO:0043900	regulation of multi-organism process	7/98	307/16119	0.00267864	0.0398844	0.0292012	IFI16/LY86/CD37/APOBEC3C/IRF8/TNFAIP3/LTF	7
lightcyan.GO:0022407	GO:0022407	regulation of cell-cell adhesion	4/98	95/16119	0.0026799	0.0398844	0.0292012	ITGAL/ZNF703/CXCL13/CCL21	4
lightcyan.GO:0045086	GO:0045086	positive regulation of interleukin-2 biosynthetic process	2/98	13/16119	0.00273199	0.0401099	0.0293663	CD3E/STAT5A	2
lightcyan.GO:0033627	GO:0033627	cell adhesion mediated by integrin	3/98	46/16119	0.00273716	0.0401099	0.0293663	CXCL13/CCL21/NPNT	3
lightcyan.GO:0051235	GO:0051235	maintenance of location	6/98	230/16119	0.0027942	0.0406333	0.0297495	STAT5A/CCL19/TMSB4X/NFKB1/NFKBIA/CCL21	6
lightcyan.GO:0050795	GO:0050795	regulation of behavior	5/98	159/16119	0.00284974	0.0411269	0.0301108	PTGDS/CCL19/CXCL13/CXCR4/CCL21	5
lightcyan.GO:0032612	GO:0032612	interleukin-1 production	3/98	47/16119	0.002911	0.0416951	0.0305269	IFI16/CCL19/ARRB2	3
lightcyan.GO:0032317	GO:0032317	regulation of Rap GTPase activity	2/98	14/16119	0.00317472	0.0435097	0.0318554	RAPGEF1/CXCL13	2
lightcyan.GO:0033622	GO:0033622	integrin activation	2/98	14/16119	0.00317472	0.0435097	0.0318554	CXCL13/MZB1	2
lightcyan.GO:0034143	GO:0034143	regulation of toll-like receptor 4 signaling pathway	2/98	14/16119	0.00317472	0.0435097	0.0318554	TNFAIP3/LTF	2
lightcyan.GO:0034695	GO:0034695	response to prostaglandin E	2/98	14/16119	0.00317472	0.0435097	0.0318554	CCL19/CCL21	2
lightcyan.GO:0060055	GO:0060055	angiogenesis involved in wound healing	2/98	14/16119	0.00317472	0.0435097	0.0318554	ETS1/TNFAIP3	2
lightcyan.GO:1903020	GO:1903020	positive regulation of glycoprotein metabolic process	2/98	14/16119	0.00317472	0.0435097	0.0318554	CCL19/CCL21	2
lightcyan.GO:0071396	GO:0071396	cellular response to lipid	7/98	318/16119	0.00325526	0.0442948	0.0324302	LY86/ZNF703/NFKB1/IRF8/NFKBIA/TNFAIP3/LTF	7
lightcyan.GO:0030183	GO:0030183	B cell differentiation	4/98	101/16119	0.00334324	0.0451693	0.0330705	GPR183/VCAM1/STAT5A/BLNK	4
lightcyan.GO:0019216	GO:0019216	regulation of lipid metabolic process	6/98	241/16119	0.00351728	0.0471861	0.0345471	CREBL2/PIK3IP1/STAT5A/CCL19/NFKB1/CCL21	6
lightcyan.GO:0002467	GO:0002467	germinal center formation	2/98	15/16119	0.00364867	0.0484528	0.0354745	CXCL13/TNFAIP3	2
lightcyan.GO:0032623	GO:0032623	interleukin-2 production	3/98	51/16119	0.00367369	0.0484528	0.0354745	CD3E/STAT5A/TNFAIP3	3
lightcyan.GO:0045785	GO:0045785	positive regulation of cell adhesion	5/98	169/16119	0.00370075	0.0484528	0.0354745	ITGAL/CXCL13/SPOCK2/CCL21/NPNT	5
lightcyan.GO:0042089	GO:0042089	cytokine biosynthetic process	4/98	104/16119	0.00371344	0.0484528	0.0354745	CD3E/STAT5A/LTB/NFKB1	4
lightyellow.GO:0008380	GO:0008380	RNA splicing	28/71	346/16119	1.30503e-28	1.2189e-25	1.03441e-25	RBM39/SRSF6/TARDBP/UPF3B/HNRNPH3/ZCRB1/PNN/THOC2/TRA2A/PPIG/SRSF11/LSM5/CCAR1/LUC7L3/PRPF38B/PABPN1/SRSF4/RBM25/SYF2/SNRPB2/HNRNPH1/PRPF4B/SRRM1/WBP4/CLK1/ZRANB2/TIA1/CIR1	28
lightyellow.GO:0006397	GO:0006397	mRNA processing	26/71	427/16119	2.77378e-23	1.29535e-20	1.09929e-20	RBM39/SRSF6/TARDBP/UPF3B/HNRNPH3/ZCRB1/PNN/THOC2/TRA2A/SRSF11/LSM5/CCAR1/LUC7L3/PRPF38B/PABPN1/SRSF4/RBM25/SYF2/SNRPB2/HNRNPH1/PRPF4B/SRRM1/WBP4/ZRANB2/TIA1/CIR1	26
lightyellow.GO:0000377	GO:0000377	RNA splicing, via transesterification reactions with bulged adenosine as nucleophile	18/71	224/16119	3.0433e-18	7.10612e-16	6.03055e-16	SRSF6/UPF3B/HNRNPH3/PNN/TRA2A/SRSF11/CCAR1/LUC7L3/PABPN1/SRSF4/RBM25/SYF2/SNRPB2/HNRNPH1/PRPF4B/SRRM1/WBP4/TIA1	18
lightyellow.GO:0000398	GO:0000398	mRNA splicing, via spliceosome	18/71	224/16119	3.0433e-18	7.10612e-16	6.03055e-16	SRSF6/UPF3B/HNRNPH3/PNN/TRA2A/SRSF11/CCAR1/LUC7L3/PABPN1/SRSF4/RBM25/SYF2/SNRPB2/HNRNPH1/PRPF4B/SRRM1/WBP4/TIA1	18
lightyellow.GO:0000375	GO:0000375	RNA splicing, via transesterification reactions	18/71	229/16119	4.52791e-18	8.45813e-16	7.17792e-16	SRSF6/UPF3B/HNRNPH3/PNN/TRA2A/SRSF11/CCAR1/LUC7L3/PABPN1/SRSF4/RBM25/SYF2/SNRPB2/HNRNPH1/PRPF4B/SRRM1/WBP4/TIA1	18
lightyellow.GO:0006406	GO:0006406	mRNA export from nucleus	8/71	72/16119	9.03066e-10	1.40577e-07	1.193e-07	SRSF6/UPF3B/THOC2/SRSF11/PABPN1/SRSF4/UPF2/SRRM1	8
lightyellow.GO:0006405	GO:0006405	RNA export from nucleus	8/71	81/16119	2.35188e-09	3.13807e-07	2.6631e-07	SRSF6/UPF3B/THOC2/SRSF11/PABPN1/SRSF4/UPF2/SRRM1	8
lightyellow.GO:0051168	GO:0051168	nuclear export	9/71	137/16119	8.46701e-09	9.88524e-07	8.38903e-07	SRSF6/UPF3B/THOC2/SRSF11/PABPN1/SRSF4/SOX4/UPF2/SRRM1	9
lightyellow.GO:0006369	GO:0006369	termination of RNA polymerase II transcription	6/71	46/16119	4.79901e-08	4.98031e-06	4.2265e-06	SRSF6/UPF3B/SRSF11/PABPN1/SRSF4/SRRM1	6
lightyellow.GO:0051028	GO:0051028	mRNA transport	8/71	129/16119	9.42825e-08	8.80598e-06	7.47313e-06	SRSF6/UPF3B/THOC2/SRSF11/PABPN1/SRSF4/UPF2/SRRM1	8
lightyellow.GO:0006353	GO:0006353	DNA-templated transcription, termination	7/71	87/16119	1.0499e-07	8.91459e-06	7.56529e-06	SRSF6/UPF3B/SRSF11/PABPN1/SRSF4/TAF1D/SRRM1	7
lightyellow.GO:0050657	GO:0050657	nucleic acid transport	8/71	149/16119	2.87111e-07	1.91544e-05	1.62552e-05	SRSF6/UPF3B/THOC2/SRSF11/PABPN1/SRSF4/UPF2/SRRM1	8
lightyellow.GO:0050658	GO:0050658	RNA transport	8/71	149/16119	2.87111e-07	1.91544e-05	1.62552e-05	SRSF6/UPF3B/THOC2/SRSF11/PABPN1/SRSF4/UPF2/SRRM1	8
lightyellow.GO:0051236	GO:0051236	establishment of RNA localization	8/71	149/16119	2.87111e-07	1.91544e-05	1.62552e-05	SRSF6/UPF3B/THOC2/SRSF11/PABPN1/SRSF4/UPF2/SRRM1	8
lightyellow.GO:0006403	GO:0006403	RNA localization	8/71	156/16119	4.08078e-07	2.54096e-05	2.15637e-05	SRSF6/UPF3B/THOC2/SRSF11/PABPN1/SRSF4/UPF2/SRRM1	8
lightyellow.GO:0006913	GO:0006913	nucleocytoplasmic transport	11/71	376/16119	7.02619e-07	4.01954e-05	3.41115e-05	SRSF6/UPF3B/THOC2/SRSF11/PABPN1/SRSF4/NOP58/SOX4/UPF2/SRRM1/CDKN1A	11
lightyellow.GO:0043484	GO:0043484	regulation of RNA splicing	6/71	72/16119	7.31608e-07	4.01954e-05	3.41115e-05	SRSF6/SRSF4/RBM25/HNRNPH1/CLK1/TIA1	6
lightyellow.GO:0051169	GO:0051169	nuclear transport	11/71	381/16119	8.00141e-07	4.15184e-05	3.52343e-05	SRSF6/UPF3B/THOC2/SRSF11/PABPN1/SRSF4/NOP58/SOX4/UPF2/SRRM1/CDKN1A	11
lightyellow.GO:0015931	GO:0015931	nucleobase-containing compound transport	8/71	178/16119	1.11102e-06	5.46153e-05	4.63488e-05	SRSF6/UPF3B/THOC2/SRSF11/PABPN1/SRSF4/UPF2/SRRM1	8
lightyellow.GO:0031124	GO:0031124	mRNA 3'-end processing	6/71	94/16119	3.53335e-06	0.000165008	0.000140032	SRSF6/UPF3B/SRSF11/PABPN1/SRSF4/SRRM1	6
lightyellow.GO:0031123	GO:0031123	RNA 3'-end processing	6/71	109/16119	8.34369e-06	0.000371095	0.000314927	SRSF6/UPF3B/SRSF11/PABPN1/SRSF4/SRRM1	6
lightyellow.GO:0050684	GO:0050684	regulation of mRNA processing	5/71	69/16119	1.29773e-05	0.000550947	0.000467557	SRSF6/PABPN1/SRSF4/RBM25/TIA1	5
lightyellow.GO:1903311	GO:1903311	regulation of mRNA metabolic process	5/71	76/16119	2.08303e-05	0.000845893	0.000717861	SRSF6/PABPN1/SRSF4/RBM25/TIA1	5
lightyellow.GO:0048024	GO:0048024	regulation of mRNA splicing, via spliceosome	4/71	44/16119	4.10668e-05	0.00159818	0.00135629	SRSF6/SRSF4/RBM25/TIA1	4
lightyellow.GO:0016973	GO:0016973	poly(A)+ mRNA export from nucleus	2/71	9/16119	0.000675039	0.0252194	0.0214023	THOC2/PABPN1	2
lightyellow.GO:0080182	GO:0080182	histone H3-K4 trimethylation	2/71	10/16119	0.000841395	0.0302255	0.0256506	OGT/RTF1	2
lightyellow.GO:0044773	GO:0044773	mitotic DNA damage checkpoint	4/71	98/16119	0.00091385	0.0316124	0.0268276	PSMD1/SYF2/SOX4/CDKN1A	4
lightyellow.GO:0051571	GO:0051571	positive regulation of histone H3-K4 methylation	2/71	11/16119	0.00102544	0.0342059	0.0290286	OGT/RTF1	2
lightyellow.GO:0044774	GO:0044774	mitotic DNA integrity checkpoint	4/71	103/16119	0.0011002	0.035434	0.0300708	PSMD1/SYF2/SOX4/CDKN1A	4
lightyellow.GO:0031058	GO:0031058	positive regulation of histone modification	3/71	51/16119	0.00146568	0.0456316	0.0387249	OGT/RTF1/NCOR1	3
lightyellow.GO:1903310	GO:1903310	positive regulation of chromatin modification	3/71	52/16119	0.00155054	0.0467162	0.0396453	OGT/RTF1/NCOR1	3
midnightblue.GO:0060337	GO:0060337	type I interferon signaling pathway	25/109	76/16119	1.7633e-36	1.54056e-33	1.01637e-33	GBP2/STAT2/IFIT3/STAT1/IRF1/OAS2/HLA-E/NLRC5/MX1/IFITM3/IFITM1/IFI35/OAS1/ISG15/IFI27/OASL/IRF7/IFI6/OAS3/PSMB8/HLA-F/HLA-B/HLA-C/HLA-A/ADAR	25
midnightblue.GO:0071357	GO:0071357	cellular response to type I interferon	25/109	76/16119	1.7633e-36	1.54056e-33	1.01637e-33	GBP2/STAT2/IFIT3/STAT1/IRF1/OAS2/HLA-E/NLRC5/MX1/IFITM3/IFITM1/IFI35/OAS1/ISG15/IFI27/OASL/IRF7/IFI6/OAS3/PSMB8/HLA-F/HLA-B/HLA-C/HLA-A/ADAR	25
midnightblue.GO:0034340	GO:0034340	response to type I interferon	25/109	77/16119	2.59791e-36	1.54056e-33	1.01637e-33	GBP2/STAT2/IFIT3/STAT1/IRF1/OAS2/HLA-E/NLRC5/MX1/IFITM3/IFITM1/IFI35/OAS1/ISG15/IFI27/OASL/IRF7/IFI6/OAS3/PSMB8/HLA-F/HLA-B/HLA-C/HLA-A/ADAR	25
midnightblue.GO:0019221	GO:0019221	cytokine-mediated signaling pathway	36/109	389/16119	2.08167e-31	9.25821e-29	6.10804e-29	GBP2/STAT2/IL15RA/GBP1/UBE2L6/IFIT3/STAT1/ICAM1/IRF1/CXCL10/CX3CL1/OAS2/HLA-E/NLRC5/PML/CXCL11/MX1/IFITM3/JAK2/IFITM1/IFI35/RIPK2/OAS1/ISG15/IFI27/OASL/IRF7/IFI6/OAS3/PSMB8/HLA-F/MYD88/HLA-B/HLA-C/HLA-A/ADAR	36
midnightblue.GO:0034341	GO:0034341	response to interferon-gamma	24/109	118/16119	2.36938e-29	8.43025e-27	5.5618e-27	GBP2/GBP1/BST2/STAT1/ICAM1/IRF1/OAS2/HLA-E/NLRC5/NUB1/PML/CALCOCO2/PARP9/IFITM3/JAK2/IFITM1/OAS1/OASL/IRF7/OAS3/HLA-F/HLA-B/HLA-C/HLA-A	24
midnightblue.GO:0051607	GO:0051607	defense response to virus	27/109	204/16119	1.1338e-27	3.36173e-25	2.21788e-25	STAT2/GBP1/CXCL9/BST2/IFIT3/STAT1/IFIH1/BIRC3/IRF1/CXCL10/OAS2/NLRC5/PML/MX1/IFITM3/IFITM1/EIF2AK2/PLSCR1/OAS1/ISG15/OASL/IRF7/OAS3/DDX60/GBP3/HLA-A/ADAR	27
midnightblue.GO:0009615	GO:0009615	response to virus	30/109	301/16119	5.2335e-27	1.33006e-24	8.77497e-25	STAT2/GBP1/CXCL9/BST2/IFIT3/STAT1/ICAM1/IFIH1/BIRC3/IRF1/CXCL10/OAS2/IFI44/NLRC5/PML/MX1/IFITM3/IFITM1/EIF2AK2/PLSCR1/OAS1/ISG15/OASL/IRF7/OAS3/DDX60/GBP3/MYD88/HLA-A/ADAR	30
midnightblue.GO:0098542	GO:0098542	defense response to other organism	31/109	379/16119	2.79995e-25	6.2264e-23	4.10783e-23	STAT2/GBP1/CXCL9/BST2/IFIT3/OPTN/STAT1/IFIH1/BIRC3/IRF1/CXCL10/OAS2/NLRC5/PML/MX1/IFITM3/IFITM1/EIF2AK2/PLSCR1/RIPK2/OAS1/ISG15/BATF2/OASL/IRF7/OAS3/DDX60/GBP3/MYD88/HLA-A/ADAR	31
midnightblue.GO:0060333	GO:0060333	interferon-gamma-mediated signaling pathway	18/109	75/16119	1.4062e-23	2.77959e-21	1.83382e-21	GBP2/GBP1/STAT1/ICAM1/IRF1/OAS2/HLA-E/NLRC5/PML/JAK2/OAS1/OASL/IRF7/OAS3/HLA-F/HLA-B/HLA-C/HLA-A	18
midnightblue.GO:0071346	GO:0071346	cellular response to interferon-gamma	18/109	98/16119	2.6732e-21	4.75563e-19	3.1375e-19	GBP2/GBP1/STAT1/ICAM1/IRF1/OAS2/HLA-E/NLRC5/PML/JAK2/OAS1/OASL/IRF7/OAS3/HLA-F/HLA-B/HLA-C/HLA-A	18
midnightblue.GO:0048525	GO:0048525	negative regulation of viral process	16/109	75/16119	3.7519e-20	6.06785e-18	4.00323e-18	TRIM21/BST2/PML/MX1/IFITM3/IFITM1/EIF2AK2/PLSCR1/OAS1/ISG15/TRIM14/OASL/OAS3/TNIP1/ADAR/TRIM26	16
midnightblue.GO:0043901	GO:0043901	negative regulation of multi-organism process	17/109	108/16119	5.88152e-19	8.71935e-17	5.75254e-17	TRIM21/BST2/PML/MX1/IFITM3/IFITM1/EIF2AK2/PLSCR1/OAS1/ISG15/TRIM14/OASL/OAS3/MYD88/TNIP1/ADAR/TRIM26	17
midnightblue.GO:0043903	GO:0043903	regulation of symbiosis, encompassing mutualism through parasitism	19/109	178/16119	8.39801e-18	1.14924e-15	7.58201e-16	TRIM21/BST2/TAP2/PML/MX1/TAP1/IFITM3/IFITM1/EIF2AK2/PLSCR1/OAS1/ISG15/TRIM14/OASL/OAS3/MYD88/TNIP1/ADAR/TRIM26	19
midnightblue.GO:0050792	GO:0050792	regulation of viral process	18/109	156/16119	1.60299e-17	2.03694e-15	1.34386e-15	TRIM21/BST2/TAP2/PML/MX1/TAP1/IFITM3/IFITM1/EIF2AK2/PLSCR1/OAS1/ISG15/TRIM14/OASL/OAS3/TNIP1/ADAR/TRIM26	18
midnightblue.GO:0045071	GO:0045071	negative regulation of viral genome replication	12/109	40/16119	2.34133e-17	2.77681e-15	1.83199e-15	BST2/MX1/IFITM3/IFITM1/EIF2AK2/PLSCR1/OAS1/ISG15/OASL/OAS3/TNIP1/ADAR	12
midnightblue.GO:0043900	GO:0043900	regulation of multi-organism process	22/109	307/16119	9.24717e-17	1.02817e-14	6.78329e-15	TRIM21/BST2/TAP2/BIRC3/PML/MX1/TAP1/IFITM3/IFITM1/EIF2AK2/PLSCR1/OAS1/ISG15/TRIM14/OASL/OAS3/DDX60/MYD88/TNIP1/HLA-A/ADAR/TRIM26	22
midnightblue.GO:0045069	GO:0045069	regulation of viral genome replication	12/109	57/16119	2.69586e-15	2.82114e-13	1.86123e-13	BST2/MX1/IFITM3/IFITM1/EIF2AK2/PLSCR1/OAS1/ISG15/OASL/OAS3/TNIP1/ADAR	12
midnightblue.GO:0002483	GO:0002483	antigen processing and presentation of endogenous peptide antigen	7/109	10/16119	6.27687e-14	6.20364e-12	4.09281e-12	TAP2/HLA-E/TAP1/TAPBP/HLA-B/HLA-C/HLA-A	7
midnightblue.GO:0002479	GO:0002479	antigen processing and presentation of exogenous peptide antigen via MHC class I, TAP-dependent	12/109	75/16119	9.0055e-14	8.0104e-12	5.28481e-12	TAP2/HLA-E/PSMB10/PSME1/PSMB9/TAP1/TAPBP/PSMB8/HLA-F/HLA-B/HLA-C/HLA-A	12
midnightblue.GO:0019079	GO:0019079	viral genome replication	12/109	75/16119	9.0055e-14	8.0104e-12	5.28481e-12	BST2/MX1/IFITM3/IFITM1/EIF2AK2/PLSCR1/OAS1/ISG15/OASL/OAS3/TNIP1/ADAR	12
midnightblue.GO:0042590	GO:0042590	antigen processing and presentation of exogenous peptide antigen via MHC class I	12/109	79/16119	1.72633e-13	1.46245e-11	9.6484e-12	TAP2/HLA-E/PSMB10/PSME1/PSMB9/TAP1/TAPBP/PSMB8/HLA-F/HLA-B/HLA-C/HLA-A	12
midnightblue.GO:0019058	GO:0019058	viral life cycle	19/109	315/16119	3.2061e-13	2.59257e-11	1.71043e-11	TRIM21/BST2/TAP2/ICAM1/PML/MX1/TAP1/IFITM3/IFITM1/EIF2AK2/PLSCR1/OAS1/ISG15/TRIM14/OASL/OAS3/TNIP1/ADAR/TRIM26	19
midnightblue.GO:0019883	GO:0019883	antigen processing and presentation of endogenous antigen	7/109	12/16119	4.09697e-13	3.16892e-11	2.09067e-11	TAP2/HLA-E/TAP1/TAPBP/HLA-B/HLA-C/HLA-A	7
midnightblue.GO:0002474	GO:0002474	antigen processing and presentation of peptide antigen via MHC class I	12/109	101/16119	3.55393e-12	2.63435e-10	1.738e-10	TAP2/HLA-E/PSMB10/PSME1/PSMB9/TAP1/TAPBP/PSMB8/HLA-F/HLA-B/HLA-C/HLA-A	12
midnightblue.GO:0045088	GO:0045088	regulation of innate immune response	17/109	275/16119	4.29105e-12	3.05351e-10	2.01453e-10	STAT2/STAT1/IFIH1/BIRC3/IRF1/HLA-E/NLRC5/PARP9/JAK2/PLSCR1/RIPK2/IRF7/DDX60/MYD88/TNIP1/HLA-B/HLA-A	17
midnightblue.GO:0019885	GO:0019885	antigen processing and presentation of endogenous peptide antigen via MHC class I	6/109	9/16119	6.87479e-12	4.70394e-10	3.1034e-10	TAP2/TAP1/TAPBP/HLA-B/HLA-C/HLA-A	6
midnightblue.GO:0035455	GO:0035455	response to interferon-alpha	7/109	17/16119	9.78484e-12	6.44712e-10	4.25345e-10	BST2/IFIT3/IFITM3/IFITM1/EIF2AK2/OAS1/ADAR	7
midnightblue.GO:0001817	GO:0001817	regulation of cytokine production	20/109	483/16119	7.02817e-11	4.4654e-09	2.94602e-09	UBE2L6/TRIM21/BST2/IDO1/IFIH1/BIRC3/IRF1/CX3CL1/NLRC5/CASP1/TRIB2/JAK2/EIF2AK2/RIPK2/ISG15/IRF7/DDX60/MYD88/HLA-B/HLA-A	20
midnightblue.GO:0035456	GO:0035456	response to interferon-beta	6/109	18/16119	1.44606e-09	8.87082e-08	5.85247e-08	BST2/STAT1/IRF1/IFITM3/IFITM1/PLSCR1	6
midnightblue.GO:0002480	GO:0002480	antigen processing and presentation of exogenous peptide antigen via MHC class I, TAP-independent	5/109	9/16119	1.58969e-09	9.42685e-08	6.2193e-08	HLA-E/HLA-F/HLA-B/HLA-C/HLA-A	5
midnightblue.GO:0002478	GO:0002478	antigen processing and presentation of exogenous peptide antigen	12/109	170/16119	1.65733e-09	9.51091e-08	6.27476e-08	TAP2/HLA-E/PSMB10/PSME1/PSMB9/TAP1/TAPBP/PSMB8/HLA-F/HLA-B/HLA-C/HLA-A	12
midnightblue.GO:0019884	GO:0019884	antigen processing and presentation of exogenous antigen	12/109	172/16119	1.89477e-09	1.05337e-07	6.94957e-08	TAP2/HLA-E/PSMB10/PSME1/PSMB9/TAP1/TAPBP/PSMB8/HLA-F/HLA-B/HLA-C/HLA-A	12
midnightblue.GO:0019882	GO:0019882	antigen processing and presentation	13/109	230/16119	5.05113e-09	2.72302e-07	1.7965e-07	TAP2/ICAM1/HLA-E/PSMB10/PSME1/PSMB9/TAP1/TAPBP/PSMB8/HLA-F/HLA-B/HLA-C/HLA-A	13
midnightblue.GO:0048002	GO:0048002	antigen processing and presentation of peptide antigen	12/109	188/16119	5.21254e-09	2.72739e-07	1.79938e-07	TAP2/HLA-E/PSMB10/PSME1/PSMB9/TAP1/TAPBP/PSMB8/HLA-F/HLA-B/HLA-C/HLA-A	12
midnightblue.GO:0001819	GO:0001819	positive regulation of cytokine production	14/109	278/16119	5.51068e-09	2.801e-07	1.84794e-07	TRIM21/IDO1/IFIH1/BIRC3/IRF1/CX3CL1/CASP1/JAK2/EIF2AK2/RIPK2/IRF7/DDX60/MYD88/HLA-A	14
midnightblue.GO:0031349	GO:0031349	positive regulation of defense response	14/109	281/16119	6.32095e-09	3.12361e-07	2.06078e-07	IDO1/IFIH1/BIRC3/IRF1/CX3CL1/HLA-E/JAK2/CD47/PLSCR1/RIPK2/IRF7/DDX60/MYD88/TNIP1	14
midnightblue.GO:0002484	GO:0002484	antigen processing and presentation of endogenous peptide antigen via MHC class I via ER pathway	4/109	5/16119	9.84123e-09	4.73177e-07	3.12176e-07	TAP2/HLA-B/HLA-C/HLA-A	4
midnightblue.GO:0032479	GO:0032479	regulation of type I interferon production	9/109	108/16119	4.74174e-08	2.21988e-06	1.46455e-06	UBE2L6/TRIM21/IFIH1/IRF1/NLRC5/RIPK2/ISG15/IRF7/MYD88	9
midnightblue.GO:0032606	GO:0032606	type I interferon production	9/109	111/16119	6.02368e-08	2.74772e-06	1.81279e-06	UBE2L6/TRIM21/IFIH1/IRF1/NLRC5/RIPK2/ISG15/IRF7/MYD88	9
midnightblue.GO:0001916	GO:0001916	positive regulation of T cell mediated cytotoxicity	5/109	20/16119	1.84351e-07	8.19902e-06	5.40925e-06	HLA-E/HLA-F/HLA-B/HLA-C/HLA-A	5
midnightblue.GO:0002697	GO:0002697	regulation of immune effector process	12/109	261/16119	1.96569e-07	8.52919e-06	5.62708e-06	BST2/ICAM1/BIRC3/HLA-E/PML/EIF2AK2/RIPK2/HLA-F/DDX60/HLA-B/HLA-C/HLA-A	12
midnightblue.GO:0001906	GO:0001906	cell killing	8/109	94/16119	2.31868e-07	9.82126e-06	6.47952e-06	ICAM1/HLA-E/APOL1/RNF19B/HLA-F/HLA-B/HLA-C/HLA-A	8
midnightblue.GO:0002456	GO:0002456	T cell mediated immunity	7/109	66/16119	2.98561e-07	1.18922e-05	7.84584e-06	ICAM1/HLA-E/BTN3A2/HLA-F/HLA-B/HLA-C/HLA-A	7
midnightblue.GO:0002486	GO:0002486	antigen processing and presentation of endogenous peptide antigen via MHC class I via ER pathway, TAP-independent	3/109	3/16119	3.00816e-07	1.18922e-05	7.84584e-06	HLA-B/HLA-C/HLA-A	3
midnightblue.GO:0042270	GO:0042270	protection from natural killer cell mediated cytotoxicity	3/109	3/16119	3.00816e-07	1.18922e-05	7.84584e-06	HLA-E/HLA-B/HLA-A	3
midnightblue.GO:0001910	GO:0001910	regulation of leukocyte mediated cytotoxicity	6/109	44/16119	4.76779e-07	1.84389e-05	1.2165e-05	ICAM1/HLA-E/HLA-F/HLA-B/HLA-C/HLA-A	6
midnightblue.GO:0001909	GO:0001909	leukocyte mediated cytotoxicity	7/109	72/16119	5.4627e-07	2.06769e-05	1.36414e-05	ICAM1/HLA-E/RNF19B/HLA-F/HLA-B/HLA-C/HLA-A	7
midnightblue.GO:0001914	GO:0001914	regulation of T cell mediated cytotoxicity	5/109	25/16119	6.14967e-07	2.27922e-05	1.5037e-05	HLA-E/HLA-F/HLA-B/HLA-C/HLA-A	5
midnightblue.GO:0002819	GO:0002819	regulation of adaptive immune response	8/109	111/16119	8.36484e-07	3.03695e-05	2.00361e-05	IRF1/HLA-E/RIPK2/IRF7/HLA-F/HLA-B/HLA-C/HLA-A	8
midnightblue.GO:0031341	GO:0031341	regulation of cell killing	6/109	50/16119	1.03857e-06	3.69522e-05	2.4379e-05	ICAM1/HLA-E/HLA-F/HLA-B/HLA-C/HLA-A	6
midnightblue.GO:0051701	GO:0051701	interaction with host	8/109	116/16119	1.17049e-06	4.03148e-05	2.65974e-05	TRIM21/TAP2/TAP1/IFITM3/IFITM1/EIF2AK2/TNIP1/TRIM26	8
midnightblue.GO:0002250	GO:0002250	adaptive immune response	11/109	254/16119	1.1784e-06	4.03148e-05	2.65974e-05	ICAM1/IRF1/HLA-E/BTN3A2/RIPK2/IRF7/HLA-F/MYD88/HLA-B/HLA-C/HLA-A	11
midnightblue.GO:0002449	GO:0002449	lymphocyte mediated immunity	10/109	208/16119	1.44778e-06	4.85961e-05	3.2061e-05	ICAM1/HLA-E/BTN3A2/IRF7/RNF19B/HLA-F/MYD88/HLA-B/HLA-C/HLA-A	10
midnightblue.GO:0002443	GO:0002443	leukocyte mediated immunity	11/109	260/16119	1.4806e-06	4.87776e-05	3.21807e-05	BST2/ICAM1/HLA-E/BTN3A2/IRF7/RNF19B/HLA-F/MYD88/HLA-B/HLA-C/HLA-A	11
midnightblue.GO:0001913	GO:0001913	T cell mediated cytotoxicity	5/109	30/16119	1.60569e-06	5.19368e-05	3.4265e-05	HLA-E/HLA-F/HLA-B/HLA-C/HLA-A	5
midnightblue.GO:0043122	GO:0043122	regulation of I-kappaB kinase/NF-kappaB signaling	10/109	213/16119	1.79457e-06	5.70096e-05	3.76117e-05	TNFSF10/BST2/STAT1/BIRC3/CASP1/RIPK2/SECTM1/SHISA5/MYD88/TNIP1	10
midnightblue.GO:0002824	GO:0002824	positive regulation of adaptive immune response based on somatic recombination of immune receptors built from immunoglobulin superfamily domains	6/109	55/16119	1.84348e-06	5.7419e-05	3.78818e-05	HLA-E/RIPK2/HLA-F/HLA-B/HLA-C/HLA-A	6
midnightblue.GO:0045089	GO:0045089	positive regulation of innate immune response	10/109	214/16119	1.87201e-06	5.7419e-05	3.78818e-05	IFIH1/BIRC3/IRF1/HLA-E/PLSCR1/RIPK2/IRF7/DDX60/MYD88/TNIP1	10
midnightblue.GO:0002460	GO:0002460	adaptive immune response based on somatic recombination of immune receptors built from immunoglobulin superfamily domains	10/109	217/16119	2.12208e-06	6.3986e-05	4.22144e-05	ICAM1/HLA-E/BTN3A2/RIPK2/IRF7/HLA-F/MYD88/HLA-B/HLA-C/HLA-A	10
midnightblue.GO:0002821	GO:0002821	positive regulation of adaptive immune response	6/109	58/16119	2.53192e-06	7.50716e-05	4.9528e-05	HLA-E/RIPK2/HLA-F/HLA-B/HLA-C/HLA-A	6
midnightblue.GO:0002711	GO:0002711	positive regulation of T cell mediated immunity	5/109	33/16119	2.63139e-06	7.67416e-05	5.06298e-05	HLA-E/HLA-F/HLA-B/HLA-C/HLA-A	5
midnightblue.GO:0039528	GO:0039528	cytoplasmic pattern recognition receptor signaling pathway in response to virus	4/109	16/16119	3.38228e-06	9.70496e-05	6.40279e-05	IFIH1/BIRC3/IRF7/DDX60	4
midnightblue.GO:0009617	GO:0009617	response to bacterium	13/109	408/16119	3.74311e-06	0.000105698	6.97338e-05	OPTN/STAT1/IDO1/ICAM1/CXCL10/CASP1/JAK2/CD47/RIPK2/ISG15/MYD88/HLA-B/HLA-A	13
midnightblue.GO:0001912	GO:0001912	positive regulation of leukocyte mediated cytotoxicity	5/109	36/16119	4.1129e-06	0.000114326	7.54258e-05	HLA-E/HLA-F/HLA-B/HLA-C/HLA-A	5
midnightblue.GO:0007249	GO:0007249	I-kappaB kinase/NF-kappaB signaling	10/109	235/16119	4.32612e-06	0.000118402	7.81153e-05	TNFSF10/BST2/STAT1/BIRC3/CASP1/RIPK2/SECTM1/SHISA5/MYD88/TNIP1	10
midnightblue.GO:0060759	GO:0060759	regulation of response to cytokine stimulus	7/109	100/16119	5.08334e-06	0.000137019	9.03976e-05	STAT2/STAT1/NLRC5/PARP9/JAK2/RIPK2/IRF7	7
midnightblue.GO:0050727	GO:0050727	regulation of inflammatory response	10/109	243/16119	5.81848e-06	0.000152833	0.00010083	CASP4/IDO1/BIRC3/CX3CL1/CASP1/JAK2/CD47/SBNO2/MYD88/TNIP1	10
midnightblue.GO:0002716	GO:0002716	negative regulation of natural killer cell mediated immunity	3/109	6/16119	5.92774e-06	0.000152833	0.00010083	HLA-E/HLA-B/HLA-A	3
midnightblue.GO:0045953	GO:0045953	negative regulation of natural killer cell mediated cytotoxicity	3/109	6/16119	5.92774e-06	0.000152833	0.00010083	HLA-E/HLA-B/HLA-A	3
midnightblue.GO:0098586	GO:0098586	cellular response to virus	4/109	19/16119	7.09133e-06	0.000180221	0.0001189	IFIH1/BIRC3/IRF7/DDX60	4
midnightblue.GO:0031343	GO:0031343	positive regulation of cell killing	5/109	41/16119	7.95901e-06	0.000199424	0.000131568	HLA-E/HLA-F/HLA-B/HLA-C/HLA-A	5
midnightblue.GO:0043123	GO:0043123	positive regulation of I-kappaB kinase/NF-kappaB signaling	8/109	154/16119	9.7222e-06	0.000240219	0.000158483	TNFSF10/BST2/BIRC3/CASP1/RIPK2/SECTM1/SHISA5/MYD88	8
midnightblue.GO:0002704	GO:0002704	negative regulation of leukocyte mediated immunity	4/109	21/16119	1.08363e-05	0.000264079	0.000174224	BST2/HLA-E/HLA-B/HLA-A	4
midnightblue.GO:0032481	GO:0032481	positive regulation of type I interferon production	6/109	75/16119	1.1477e-05	0.000275912	0.000182031	TRIM21/IFIH1/IRF1/RIPK2/IRF7/MYD88	6
midnightblue.GO:0032728	GO:0032728	positive regulation of interferon-beta production	4/109	22/16119	1.31755e-05	0.000308411	0.000203472	IFIH1/IRF1/RIPK2/IRF7	4
midnightblue.GO:0046596	GO:0046596	regulation of viral entry into host cell	4/109	22/16119	1.31755e-05	0.000308411	0.000203472	TRIM21/IFITM3/IFITM1/TRIM26	4
midnightblue.GO:0002709	GO:0002709	regulation of T cell mediated immunity	5/109	46/16119	1.41724e-05	0.000327437	0.000216024	HLA-E/HLA-F/HLA-B/HLA-C/HLA-A	5
midnightblue.GO:1903321	GO:1903321	negative regulation of protein modification by small protein conjugation or removal	7/109	118/16119	1.51554e-05	0.00034566	0.000228047	TRIM21/PSMB10/PSME1/PML/PSMB9/ISG15/PSMB8	7
midnightblue.GO:0002753	GO:0002753	cytoplasmic pattern recognition receptor signaling pathway	5/109	47/16119	1.57746e-05	0.000355229	0.00023436	IFIH1/BIRC3/RIPK2/IRF7/DDX60	5
midnightblue.GO:0002703	GO:0002703	regulation of leukocyte mediated immunity	7/109	119/16119	1.60138e-05	0.000356107	0.000234939	BST2/ICAM1/HLA-E/HLA-F/HLA-B/HLA-C/HLA-A	7
midnightblue.GO:0006919	GO:0006919	activation of cysteine-type endopeptidase activity involved in apoptotic process	6/109	83/16119	2.05927e-05	0.000452277	0.000298387	TNFSF10/CASP1/PML/JAK2/IFI27/BAK1	6
midnightblue.GO:0002221	GO:0002221	pattern recognition receptor signaling pathway	8/109	172/16119	2.17175e-05	0.000471163	0.000310847	IFIH1/BIRC3/IRF1/RIPK2/IRF7/DDX60/MYD88/TNIP1	8
midnightblue.GO:0060330	GO:0060330	regulation of response to interferon-gamma	4/109	25/16119	2.24314e-05	0.000480789	0.000317198	STAT1/NLRC5/PARP9/JAK2	4
midnightblue.GO:1903320	GO:1903320	regulation of protein modification by small protein conjugation or removal	9/109	227/16119	2.3391e-05	0.000494007	0.000325918	TRIM21/BIRC3/PSMB10/PSME1/PML/PSMB9/RIPK2/ISG15/PSMB8	9
midnightblue.GO:0002758	GO:0002758	innate immune response-activating signal transduction	8/109	174/16119	2.36035e-05	0.000494007	0.000325918	IFIH1/BIRC3/IRF1/RIPK2/IRF7/DDX60/MYD88/TNIP1	8
midnightblue.GO:0052548	GO:0052548	regulation of endopeptidase activity	11/109	349/16119	2.42026e-05	0.000495902	0.000327169	CARD16/TNFSF10/BST2/BIRC3/CASP1/PSME1/PML/JAK2/IFI27/IFI6/BAK1	11
midnightblue.GO:0001911	GO:0001911	negative regulation of leukocyte mediated cytotoxicity	3/109	9/16119	2.45303e-05	0.000495902	0.000327169	HLA-E/HLA-B/HLA-A	3
midnightblue.GO:0031342	GO:0031342	negative regulation of cell killing	3/109	9/16119	2.45303e-05	0.000495902	0.000327169	HLA-E/HLA-B/HLA-A	3
midnightblue.GO:0010950	GO:0010950	positive regulation of endopeptidase activity	7/109	128/16119	2.57105e-05	0.00051392	0.000339056	TNFSF10/CASP1/PSME1/PML/JAK2/IFI27/BAK1	7
midnightblue.GO:0097202	GO:0097202	activation of cysteine-type endopeptidase activity	6/109	88/16119	2.87696e-05	0.000568679	0.000375182	TNFSF10/CASP1/PML/JAK2/IFI27/BAK1	6
midnightblue.GO:0002218	GO:0002218	activation of innate immune response	8/109	181/16119	3.13231e-05	0.00061235	0.000403994	IFIH1/BIRC3/IRF1/RIPK2/IRF7/DDX60/MYD88/TNIP1	8
midnightblue.GO:0052547	GO:0052547	regulation of peptidase activity	11/109	366/16119	3.73996e-05	0.000715996	0.000472374	CARD16/TNFSF10/BST2/BIRC3/CASP1/PSME1/PML/JAK2/IFI27/IFI6/BAK1	11
midnightblue.GO:0002708	GO:0002708	positive regulation of lymphocyte mediated immunity	5/109	56/16119	3.74298e-05	0.000715996	0.000472374	HLA-E/HLA-F/HLA-B/HLA-C/HLA-A	5
midnightblue.GO:0032609	GO:0032609	interferon-gamma production	6/109	93/16119	3.9375e-05	0.000745193	0.000491636	BTN3A1/BTN3A2/RIPK2/ISG15/RNF19B/HLA-A	6
midnightblue.GO:0010952	GO:0010952	positive regulation of peptidase activity	7/109	138/16119	4.16994e-05	0.000775172	0.000511415	TNFSF10/CASP1/PSME1/PML/JAK2/IFI27/BAK1	7
midnightblue.GO:0001959	GO:0001959	regulation of cytokine-mediated signaling pathway	6/109	94/16119	4.18306e-05	0.000775172	0.000511415	STAT2/STAT1/NLRC5/JAK2/RIPK2/IRF7	6
midnightblue.GO:0002705	GO:0002705	positive regulation of leukocyte mediated immunity	5/109	58/16119	4.44204e-05	0.00081468	0.00053748	HLA-E/HLA-F/HLA-B/HLA-C/HLA-A	5
midnightblue.GO:0046967	GO:0046967	cytosol to ER transport	2/109	2/16119	4.53107e-05	0.000822528	0.000542658	TAP2/TAP1	2
midnightblue.GO:0032727	GO:0032727	positive regulation of interferon-alpha production	3/109	11/16119	4.77112e-05	0.000848782	0.000559979	IFIH1/RIPK2/IRF7	3
midnightblue.GO:0072643	GO:0072643	interferon-gamma secretion	3/109	11/16119	4.77112e-05	0.000848782	0.000559979	BTN3A1/BTN3A2/RNF19B	3
midnightblue.GO:2000116	GO:2000116	regulation of cysteine-type endopeptidase activity	8/109	196/16119	5.51452e-05	0.000971319	0.000640822	TNFSF10/BIRC3/CASP1/PML/JAK2/IFI27/IFI6/BAK1	8
midnightblue.GO:0002822	GO:0002822	regulation of adaptive immune response based on somatic recombination of immune receptors built from immunoglobulin superfamily domains	6/109	102/16119	6.62224e-05	0.001155	0.000762001	HLA-E/RIPK2/HLA-F/HLA-B/HLA-C/HLA-A	6
midnightblue.GO:0043950	GO:0043950	positive regulation of cAMP-mediated signaling	3/109	13/16119	8.18874e-05	0.00141435	0.000933107	CXCL9/CXCL10/CXCL11	3
midnightblue.GO:0006977	GO:0006977	DNA damage response, signal transduction by p53 class mediator resulting in cell cycle arrest	5/109	66/16119	8.30008e-05	0.00141979	0.000936699	PSMB10/PSME1/PML/PSMB9/PSMB8	5
midnightblue.GO:0032648	GO:0032648	regulation of interferon-beta production	4/109	35/16119	8.81389e-05	0.00148331	0.000978602	IFIH1/IRF1/RIPK2/IRF7	4
midnightblue.GO:0072431	GO:0072431	signal transduction involved in mitotic G1 DNA damage checkpoint	5/109	67/16119	8.92151e-05	0.00148331	0.000978602	PSMB10/PSME1/PML/PSMB9/PSMB8	5
midnightblue.GO:1902400	GO:1902400	intracellular signal transduction involved in G1 DNA damage checkpoint	5/109	67/16119	8.92151e-05	0.00148331	0.000978602	PSMB10/PSME1/PML/PSMB9/PSMB8	5
midnightblue.GO:0031396	GO:0031396	regulation of protein ubiquitination	8/109	211/16119	9.24693e-05	0.00149469	0.000986114	BIRC3/PSMB10/PSME1/PML/PSMB9/RIPK2/ISG15/PSMB8	8
midnightblue.GO:0010522	GO:0010522	regulation of calcium ion transport into cytosol	5/109	68/16119	9.57813e-05	0.00149469	0.000986114	CXCL9/CXCL10/PML/CXCL11/BAK1	5
midnightblue.GO:0072401	GO:0072401	signal transduction involved in DNA integrity checkpoint	5/109	68/16119	9.57813e-05	0.00149469	0.000986114	PSMB10/PSME1/PML/PSMB9/PSMB8	5
midnightblue.GO:0072413	GO:0072413	signal transduction involved in mitotic cell cycle checkpoint	5/109	68/16119	9.57813e-05	0.00149469	0.000986114	PSMB10/PSME1/PML/PSMB9/PSMB8	5
midnightblue.GO:0072422	GO:0072422	signal transduction involved in DNA damage checkpoint	5/109	68/16119	9.57813e-05	0.00149469	0.000986114	PSMB10/PSME1/PML/PSMB9/PSMB8	5
midnightblue.GO:1902402	GO:1902402	signal transduction involved in mitotic DNA damage checkpoint	5/109	68/16119	9.57813e-05	0.00149469	0.000986114	PSMB10/PSME1/PML/PSMB9/PSMB8	5
midnightblue.GO:1902403	GO:1902403	signal transduction involved in mitotic DNA integrity checkpoint	5/109	68/16119	9.57813e-05	0.00149469	0.000986114	PSMB10/PSME1/PML/PSMB9/PSMB8	5
midnightblue.GO:0010524	GO:0010524	positive regulation of calcium ion transport into cytosol	4/109	36/16119	9.86422e-05	0.00151431	0.000999059	CXCL9/CXCL10/CXCL11/BAK1	4
midnightblue.GO:0051091	GO:0051091	positive regulation of sequence-specific DNA binding transcription factor activity	8/109	213/16119	9.87411e-05	0.00151431	0.000999059	TRIM21/ICAM1/JAK2/EIF2AK2/RIPK2/TRIM14/MYD88/TRIM26	8
midnightblue.GO:0031638	GO:0031638	zymogen activation	6/109	110/16119	0.000100835	0.00153321	0.00101153	TNFSF10/CASP1/PML/JAK2/IFI27/BAK1	6
midnightblue.GO:0072395	GO:0072395	signal transduction involved in cell cycle checkpoint	5/109	69/16119	0.000102713	0.00154852	0.00102163	PSMB10/PSME1/PML/PSMB9/PSMB8	5
midnightblue.GO:0043280	GO:0043280	positive regulation of cysteine-type endopeptidase activity involved in apoptotic process	6/109	111/16119	0.000106017	0.00158491	0.00104564	TNFSF10/CASP1/PML/JAK2/IFI27/BAK1	6
midnightblue.GO:0032608	GO:0032608	interferon-beta production	4/109	37/16119	0.000110025	0.00163113	0.00107613	IFIH1/IRF1/RIPK2/IRF7	4
midnightblue.GO:0031397	GO:0031397	negative regulation of protein ubiquitination	6/109	112/16119	0.000111409	0.00163799	0.00108065	PSMB10/PSME1/PML/PSMB9/ISG15/PSMB8	6
midnightblue.GO:1903034	GO:1903034	regulation of response to wounding	10/109	344/16119	0.000112859	0.00164571	0.00108574	CASP4/IDO1/BIRC3/CX3CL1/CASP1/JAK2/CD47/SBNO2/MYD88/TNIP1	10
midnightblue.GO:0032480	GO:0032480	negative regulation of type I interferon production	4/109	38/16119	0.000122332	0.00175507	0.0011579	UBE2L6/IFIH1/NLRC5/ISG15	4
midnightblue.GO:0060338	GO:0060338	regulation of type I interferon-mediated signaling pathway	4/109	38/16119	0.000122332	0.00175507	0.0011579	STAT2/STAT1/NLRC5/IRF7	4
midnightblue.GO:0002698	GO:0002698	negative regulation of immune effector process	5/109	72/16119	0.000125836	0.00179089	0.00118153	BST2/HLA-E/EIF2AK2/HLA-B/HLA-A	5
midnightblue.GO:1902187	GO:1902187	negative regulation of viral release from host cell	3/109	15/16119	0.000128997	0.00182132	0.0012016	TRIM21/PML/TRIM26	3
midnightblue.GO:0010498	GO:0010498	proteasomal protein catabolic process	9/109	284/16119	0.000131955	0.00184841	0.00121948	PSMB10/TRIB2/ENC1/NUB1/PSME1/PML/PSMB9/FBXO6/PSMB8	9
midnightblue.GO:0002476	GO:0002476	antigen processing and presentation of endogenous peptide antigen via MHC class Ib	2/109	3/16119	0.000135331	0.00185195	0.00122181	TAP2/HLA-E	2
midnightblue.GO:0034124	GO:0034124	regulation of MyD88-dependent toll-like receptor signaling pathway	2/109	3/16119	0.000135331	0.00185195	0.00122181	IRF1/IRF7	2
midnightblue.GO:0060700	GO:0060700	regulation of ribonuclease activity	2/109	3/16119	0.000135331	0.00185195	0.00122181	OAS1/OAS3	2
midnightblue.GO:0002699	GO:0002699	positive regulation of immune effector process	6/109	117/16119	0.000141727	0.00192468	0.00126979	HLA-E/RIPK2/HLA-F/HLA-B/HLA-C/HLA-A	6
midnightblue.GO:2001056	GO:2001056	positive regulation of cysteine-type endopeptidase activity	6/109	119/16119	0.000155543	0.0020963	0.00138302	TNFSF10/CASP1/PML/JAK2/IFI27/BAK1	6
midnightblue.GO:0032647	GO:0032647	regulation of interferon-alpha production	3/109	16/16119	0.000157985	0.0021132	0.00139417	IFIH1/RIPK2/IRF7	3
midnightblue.GO:0031571	GO:0031571	mitotic G1 DNA damage checkpoint	5/109	76/16119	0.000162637	0.00215919	0.00142451	PSMB10/PSME1/PML/PSMB9/PSMB8	5
midnightblue.GO:0046718	GO:0046718	viral entry into host cell	4/109	41/16119	0.000165238	0.00217747	0.00143657	TRIM21/IFITM3/IFITM1/TRIM26	4
midnightblue.GO:0032496	GO:0032496	response to lipopolysaccharide	8/109	230/16119	0.000167706	0.00219375	0.00144731	STAT1/IDO1/ICAM1/CXCL10/CASP1/JAK2/RIPK2/MYD88	8
midnightblue.GO:0044783	GO:0044783	G1 DNA damage checkpoint	5/109	77/16119	0.000173003	0.00221419	0.0014608	PSMB10/PSME1/PML/PSMB9/PSMB8	5
midnightblue.GO:0044819	GO:0044819	mitotic G1/S transition checkpoint	5/109	77/16119	0.000173003	0.00221419	0.0014608	PSMB10/PSME1/PML/PSMB9/PSMB8	5
midnightblue.GO:0050688	GO:0050688	regulation of defense response to virus	5/109	77/16119	0.000173003	0.00221419	0.0014608	BIRC3/PML/EIF2AK2/DDX60/HLA-A	5
midnightblue.GO:0050729	GO:0050729	positive regulation of inflammatory response	5/109	78/16119	0.000183866	0.00233642	0.00154144	IDO1/CX3CL1/JAK2/CD47/TNIP1	5
midnightblue.GO:0032607	GO:0032607	interferon-alpha production	3/109	17/16119	0.000190896	0.00239158	0.00157783	IFIH1/RIPK2/IRF7	3
midnightblue.GO:0046597	GO:0046597	negative regulation of viral entry into host cell	3/109	17/16119	0.000190896	0.00239158	0.00157783	IFITM3/IFITM1/TRIM26	3
midnightblue.GO:0002228	GO:0002228	natural killer cell mediated immunity	4/109	43/16119	0.000199282	0.00246197	0.00162427	HLA-E/RNF19B/HLA-B/HLA-A	4
midnightblue.GO:0042267	GO:0042267	natural killer cell mediated cytotoxicity	4/109	43/16119	0.000199282	0.00246197	0.00162427	HLA-E/RNF19B/HLA-B/HLA-A	4
midnightblue.GO:0032655	GO:0032655	regulation of interleukin-12 production	4/109	44/16119	0.000218076	0.00267556	0.00176519	IDO1/IRF1/RIPK2/HLA-B	4
midnightblue.GO:0002757	GO:0002757	immune response-activating signal transduction	10/109	374/16119	0.000222478	0.00271088	0.00178849	BTN3A1/IFIH1/BIRC3/IRF1/PLSCR1/RIPK2/IRF7/DDX60/MYD88/TNIP1	10
midnightblue.GO:0032615	GO:0032615	interleukin-12 production	4/109	45/16119	0.000238112	0.00288164	0.00190115	IDO1/IRF1/RIPK2/HLA-B	4
midnightblue.GO:0002237	GO:0002237	response to molecule of bacterial origin	8/109	244/16119	0.000250701	0.00293301	0.00193503	STAT1/IDO1/ICAM1/CXCL10/CASP1/JAK2/RIPK2/MYD88	8
midnightblue.GO:0030260	GO:0030260	entry into host cell	4/109	46/16119	0.00025944	0.00293301	0.00193503	TRIM21/IFITM3/IFITM1/TRIM26	4
midnightblue.GO:0044409	GO:0044409	entry into host	4/109	46/16119	0.00025944	0.00293301	0.00193503	TRIM21/IFITM3/IFITM1/TRIM26	4
midnightblue.GO:0051806	GO:0051806	entry into cell of other organism involved in symbiotic interaction	4/109	46/16119	0.00025944	0.00293301	0.00193503	TRIM21/IFITM3/IFITM1/TRIM26	4
midnightblue.GO:0051828	GO:0051828	entry into other organism involved in symbiotic interaction	4/109	46/16119	0.00025944	0.00293301	0.00193503	TRIM21/IFITM3/IFITM1/TRIM26	4
midnightblue.GO:0052126	GO:0052126	movement in host environment	4/109	46/16119	0.00025944	0.00293301	0.00193503	TRIM21/IFITM3/IFITM1/TRIM26	4
midnightblue.GO:0052192	GO:0052192	movement in environment of other organism involved in symbiotic interaction	4/109	46/16119	0.00025944	0.00293301	0.00193503	TRIM21/IFITM3/IFITM1/TRIM26	4
midnightblue.GO:0002755	GO:0002755	MyD88-dependent toll-like receptor signaling pathway	5/109	84/16119	0.000260388	0.00293301	0.00193503	IRF1/RIPK2/IRF7/MYD88/TNIP1	5
midnightblue.GO:0071158	GO:0071158	positive regulation of cell cycle arrest	5/109	84/16119	0.000260388	0.00293301	0.00193503	PSMB10/PSME1/PML/PSMB9/PSMB8	5
midnightblue.GO:0032103	GO:0032103	positive regulation of response to external stimulus	7/109	185/16119	0.000260492	0.00293301	0.00193503	IDO1/CXCL10/CX3CL1/JAK2/CD47/DDX60/TNIP1	7
midnightblue.GO:0043281	GO:0043281	regulation of cysteine-type endopeptidase activity involved in apoptotic process	7/109	185/16119	0.000260492	0.00293301	0.00193503	TNFSF10/CASP1/PML/JAK2/IFI27/IFI6/BAK1	7
midnightblue.GO:0002707	GO:0002707	negative regulation of lymphocyte mediated immunity	3/109	19/16119	0.000269361	0.0029961	0.00197666	HLA-E/HLA-B/HLA-A	3
midnightblue.GO:0002428	GO:0002428	antigen processing and presentation of peptide antigen via MHC class Ib	2/109	4/16119	0.000269464	0.0029961	0.00197666	TAP2/HLA-E	2
midnightblue.GO:0045824	GO:0045824	negative regulation of innate immune response	3/109	21/16119	0.00036609	0.00404518	0.00266878	HLA-E/HLA-B/HLA-A	3
midnightblue.GO:0031400	GO:0031400	negative regulation of protein modification process	10/109	400/16119	0.000379628	0.00416888	0.00275039	TRIM21/PSMB10/TRIB2/PSME1/PML/PSMB9/ISG15/PSMB8/ADAR/BAK1	10
midnightblue.GO:0002764	GO:0002764	immune response-regulating signaling pathway	11/109	481/16119	0.000410809	0.00448361	0.00295804	BTN3A1/IFIH1/BIRC3/IRF1/MOV10/PLSCR1/RIPK2/IRF7/DDX60/MYD88/TNIP1	11
midnightblue.GO:0002224	GO:0002224	toll-like receptor signaling pathway	6/109	143/16119	0.000420024	0.00454791	0.00300046	BIRC3/IRF1/RIPK2/IRF7/MYD88/TNIP1	6
midnightblue.GO:1902186	GO:1902186	regulation of viral release from host cell	3/109	22/16119	0.000421813	0.00454791	0.00300046	TRIM21/PML/TRIM26	3
midnightblue.GO:0043161	GO:0043161	proteasome-mediated ubiquitin-dependent protein catabolic process	8/109	265/16119	0.000435894	0.00465162	0.00306888	PSMB10/TRIB2/NUB1/PSME1/PML/PSMB9/FBXO6/PSMB8	8
midnightblue.GO:0019060	GO:0019060	intracellular transport of viral protein in host cell	2/109	5/16119	0.000447121	0.00465162	0.00306888	TAP2/TAP1	2
midnightblue.GO:0030581	GO:0030581	symbiont intracellular protein transport in host	2/109	5/16119	0.000447121	0.00465162	0.00306888	TAP2/TAP1	2
midnightblue.GO:0046719	GO:0046719	regulation by virus of viral protein levels in host cell	2/109	5/16119	0.000447121	0.00465162	0.00306888	TAP2/TAP1	2
midnightblue.GO:0051708	GO:0051708	intracellular protein transport in other organism involved in symbiotic interaction	2/109	5/16119	0.000447121	0.00465162	0.00306888	TAP2/TAP1	2
midnightblue.GO:0070671	GO:0070671	response to interleukin-12	2/109	5/16119	0.000447121	0.00465162	0.00306888	JAK2/RIPK2	2
midnightblue.GO:0051090	GO:0051090	regulation of sequence-specific DNA binding transcription factor activity	9/109	336/16119	0.000457271	0.00472957	0.0031203	TRIM21/ICAM1/NLRC5/JAK2/EIF2AK2/RIPK2/TRIM14/MYD88/TRIM26	9
midnightblue.GO:0002706	GO:0002706	regulation of lymphocyte mediated immunity	5/109	95/16119	0.000460801	0.00473853	0.00312621	HLA-E/HLA-F/HLA-B/HLA-C/HLA-A	5
midnightblue.GO:0031398	GO:0031398	positive regulation of protein ubiquitination	6/109	146/16119	0.00046908	0.00479594	0.00316409	BIRC3/PSMB10/PSME1/PSMB9/RIPK2/PSMB8	6
midnightblue.GO:0043949	GO:0043949	regulation of cAMP-mediated signaling	3/109	23/16119	0.000482705	0.00488751	0.00322451	CXCL9/CXCL10/CXCL11	3
midnightblue.GO:1903036	GO:1903036	positive regulation of response to wounding	5/109	96/16119	0.000483532	0.00488751	0.00322451	IDO1/CX3CL1/JAK2/CD47/TNIP1	5
midnightblue.GO:0044773	GO:0044773	mitotic DNA damage checkpoint	5/109	98/16119	0.000531515	0.00527889	0.00348271	PSMB10/PSME1/PML/PSMB9/PSMB8	5
midnightblue.GO:1902807	GO:1902807	negative regulation of cell cycle G1/S phase transition	5/109	98/16119	0.000531515	0.00527889	0.00348271	PSMB10/PSME1/PML/PSMB9/PSMB8	5
midnightblue.GO:2000134	GO:2000134	negative regulation of G1/S transition of mitotic cell cycle	5/109	98/16119	0.000531515	0.00527889	0.00348271	PSMB10/PSME1/PML/PSMB9/PSMB8	5
midnightblue.GO:0001961	GO:0001961	positive regulation of cytokine-mediated signaling pathway	3/109	24/16119	0.000548957	0.00527889	0.00348271	NLRC5/RIPK2/IRF7	3
midnightblue.GO:0002715	GO:0002715	regulation of natural killer cell mediated immunity	3/109	24/16119	0.000548957	0.00527889	0.00348271	HLA-E/HLA-B/HLA-A	3
midnightblue.GO:0032897	GO:0032897	negative regulation of viral transcription	3/109	24/16119	0.000548957	0.00527889	0.00348271	TRIM21/IFITM3/TRIM14	3
midnightblue.GO:0042269	GO:0042269	regulation of natural killer cell mediated cytotoxicity	3/109	24/16119	0.000548957	0.00527889	0.00348271	HLA-E/HLA-B/HLA-A	3
midnightblue.GO:0051281	GO:0051281	positive regulation of release of sequestered calcium ion into cytosol	3/109	24/16119	0.000548957	0.00527889	0.00348271	CXCL9/CXCL10/CXCL11	3
midnightblue.GO:0060334	GO:0060334	regulation of interferon-gamma-mediated signaling pathway	3/109	24/16119	0.000548957	0.00527889	0.00348271	STAT1/NLRC5/JAK2	3
midnightblue.GO:0051603	GO:0051603	proteolysis involved in cellular protein catabolic process	11/109	499/16119	0.000558579	0.00533374	0.0035189	UBE2L6/PSMB10/TRIB2/ENC1/NUB1/PSME1/PML/PSMB9/FBXO6/ISG15/PSMB8	11
midnightblue.GO:0000077	GO:0000077	DNA damage checkpoint	6/109	151/16119	0.000560657	0.00533374	0.0035189	PSMB10/PSME1/PML/PSMB9/FBXO6/PSMB8	6
midnightblue.GO:0030522	GO:0030522	intracellular receptor signaling pathway	8/109	278/16119	0.000597892	0.00563067	0.0037148	IFIH1/BIRC3/CASP1/PML/JAK2/RIPK2/IRF7/DDX60	8
midnightblue.GO:0002253	GO:0002253	activation of immune response	10/109	424/16119	0.000598199	0.00563067	0.0037148	BTN3A1/IFIH1/BIRC3/IRF1/PLSCR1/RIPK2/IRF7/DDX60/MYD88/TNIP1	10
midnightblue.GO:0019076	GO:0019076	viral release from host cell	3/109	25/16119	0.000620756	0.00573267	0.00378209	TRIM21/PML/TRIM26	3
midnightblue.GO:0060760	GO:0060760	positive regulation of response to cytokine stimulus	3/109	25/16119	0.000620756	0.00573267	0.00378209	NLRC5/RIPK2/IRF7	3
midnightblue.GO:0001818	GO:0001818	negative regulation of cytokine production	6/109	154/16119	0.000621925	0.00573267	0.00378209	UBE2L6/BST2/IDO1/IFIH1/NLRC5/ISG15	6
midnightblue.GO:2000021	GO:2000021	regulation of ion homeostasis	6/109	154/16119	0.000621925	0.00573267	0.00378209	CXCL9/CXCL10/PML/CXCL11/IFI6/BAK1	6
midnightblue.GO:0044774	GO:0044774	mitotic DNA integrity checkpoint	5/109	103/16119	0.000667118	0.00596919	0.00393813	PSMB10/PSME1/PML/PSMB9/PSMB8	5
midnightblue.GO:0060402	GO:0060402	calcium ion transport into cytosol	5/109	103/16119	0.000667118	0.00596919	0.00393813	CXCL9/CXCL10/PML/CXCL11/BAK1	5
midnightblue.GO:0071156	GO:0071156	regulation of cell cycle arrest	5/109	103/16119	0.000667118	0.00596919	0.00393813	PSMB10/PSME1/PML/PSMB9/PSMB8	5
midnightblue.GO:0006858	GO:0006858	extracellular transport	2/109	6/16119	0.000667717	0.00596919	0.00393813	TAP2/TAP1	2
midnightblue.GO:0032020	GO:0032020	ISG15-protein conjugation	2/109	6/16119	0.000667717	0.00596919	0.00393813	UBE2L6/ISG15	2
midnightblue.GO:0039530	GO:0039530	MDA-5 signaling pathway	2/109	6/16119	0.000667717	0.00596919	0.00393813	IRF7/DDX60	2
midnightblue.GO:0060401	GO:0060401	cytosolic calcium ion transport	5/109	104/16119	0.000697083	0.00620055	0.00409077	CXCL9/CXCL10/PML/CXCL11/BAK1	5
midnightblue.GO:1903322	GO:1903322	positive regulation of protein modification by small protein conjugation or removal	6/109	158/16119	0.00071156	0.00629784	0.00415496	BIRC3/PSMB10/PSME1/PSMB9/RIPK2/PSMB8	6
midnightblue.GO:0097191	GO:0097191	extrinsic apoptotic signaling pathway	7/109	220/16119	0.00073598	0.00648172	0.00427628	TNFSF10/ICAM1/CX3CL1/PML/JAK2/IFI6/BAK1	7
midnightblue.GO:0031570	GO:0031570	DNA integrity checkpoint	6/109	160/16119	0.000759971	0.00666004	0.00439392	PSMB10/PSME1/PML/PSMB9/FBXO6/PSMB8	6
midnightblue.GO:0048247	GO:0048247	lymphocyte chemotaxis	3/109	27/16119	0.00078172	0.00681324	0.00449499	CXCL10/CX3CL1/CXCL11	3
midnightblue.GO:0051924	GO:0051924	regulation of calcium ion transport	6/109	161/16119	0.000785112	0.00681324	0.00449499	CXCL9/ICAM1/CXCL10/PML/CXCL11/BAK1	6
midnightblue.GO:0002831	GO:0002831	regulation of response to biotic stimulus	5/109	107/16119	0.000793038	0.00684862	0.00451833	BIRC3/PML/EIF2AK2/DDX60/HLA-A	5
midnightblue.GO:0072331	GO:0072331	signal transduction by p53 class mediator	6/109	162/16119	0.000810891	0.00696896	0.00459773	PSMB10/PSME1/PML/PSMB9/SHISA5/PSMB8	6
midnightblue.GO:0006521	GO:0006521	regulation of cellular amino acid metabolic process	4/109	62/16119	0.000816335	0.00698202	0.00460634	PSMB10/PSME1/PSMB9/PSMB8	4
midnightblue.GO:0002683	GO:0002683	negative regulation of immune system process	7/109	225/16119	0.00083981	0.00714843	0.00471613	BST2/IDO1/IRF1/HLA-E/EIF2AK2/HLA-B/HLA-A	7
midnightblue.GO:0002475	GO:0002475	antigen processing and presentation via MHC class Ib	2/109	7/16119	0.000930675	0.00788414	0.00520152	TAP2/HLA-E	2
midnightblue.GO:0007259	GO:0007259	JAK-STAT cascade	5/109	112/16119	0.000974441	0.00817703	0.00539474	STAT2/IL15RA/STAT1/JAK2/NMI	5
midnightblue.GO:0030330	GO:0030330	DNA damage response, signal transduction by p53 class mediator	5/109	112/16119	0.000974441	0.00817703	0.00539474	PSMB10/PSME1/PML/PSMB9/PSMB8	5
midnightblue.GO:0051436	GO:0051436	negative regulation of ubiquitin-protein ligase activity involved in mitotic cell cycle	4/109	67/16119	0.00109302	0.00907801	0.00598916	PSMB10/PSME1/PSMB9/PSMB8	4
midnightblue.GO:0071260	GO:0071260	cellular response to mechanical stimulus	4/109	67/16119	0.00109302	0.00907801	0.00598916	IRF1/CASP1/MYD88/BAK1	4
midnightblue.GO:0071222	GO:0071222	cellular response to lipopolysaccharide	5/109	115/16119	0.00109712	0.00907801	0.00598916	STAT1/ICAM1/CXCL10/RIPK2/MYD88	5
midnightblue.GO:0009612	GO:0009612	response to mechanical stimulus	6/109	173/16119	0.00113979	0.00938744	0.00619331	STAT1/IRF1/CXCL10/CASP1/MYD88/BAK1	6
midnightblue.GO:0019941	GO:0019941	modification-dependent protein catabolic process	10/109	462/16119	0.00115096	0.00943574	0.00622517	UBE2L6/PSMB10/TRIB2/NUB1/PSME1/PML/PSMB9/FBXO6/ISG15/PSMB8	10
midnightblue.GO:0043632	GO:0043632	modification-dependent macromolecule catabolic process	10/109	466/16119	0.00122785	0.00999007	0.00659089	UBE2L6/PSMB10/TRIB2/NUB1/PSME1/PML/PSMB9/FBXO6/ISG15/PSMB8	10
midnightblue.GO:0035457	GO:0035457	cellular response to interferon-alpha	2/109	8/16119	0.00123542	0.00999007	0.00659089	IFIT3/OAS1	2
midnightblue.GO:0060340	GO:0060340	positive regulation of type I interferon-mediated signaling pathway	2/109	8/16119	0.00123542	0.00999007	0.00659089	NLRC5/IRF7	2
midnightblue.GO:0071219	GO:0071219	cellular response to molecule of bacterial origin	5/109	121/16119	0.00137638	0.0110796	0.00730968	STAT1/ICAM1/CXCL10/RIPK2/MYD88	5
midnightblue.GO:0051437	GO:0051437	positive regulation of ubiquitin-protein ligase activity involved in mitotic cell cycle	4/109	72/16119	0.00142967	0.0114053	0.00752457	PSMB10/PSME1/PSMB9/PSMB8	4
midnightblue.GO:0051928	GO:0051928	positive regulation of calcium ion transport	4/109	72/16119	0.00142967	0.0114053	0.00752457	CXCL9/CXCL10/CXCL11/BAK1	4
midnightblue.GO:0051092	GO:0051092	positive regulation of NF-kappaB transcription factor activity	5/109	124/16119	0.00153419	0.012057	0.00795456	ICAM1/EIF2AK2/RIPK2/TRIM14/MYD88	5
midnightblue.GO:0044766	GO:0044766	multi-organism transport	3/109	34/16119	0.00154525	0.012057	0.00795456	BST2/TAP2/TAP1	3
midnightblue.GO:0046794	GO:0046794	transport of virus	3/109	34/16119	0.00154525	0.012057	0.00795456	BST2/TAP2/TAP1	3
midnightblue.GO:0075733	GO:0075733	intracellular transport of virus	3/109	34/16119	0.00154525	0.012057	0.00795456	BST2/TAP2/TAP1	3
midnightblue.GO:1902583	GO:1902583	multi-organism intracellular transport	3/109	34/16119	0.00154525	0.012057	0.00795456	BST2/TAP2/TAP1	3
midnightblue.GO:0039535	GO:0039535	regulation of RIG-I signaling pathway	2/109	9/16119	0.00158139	0.0121877	0.00804077	BIRC3/DDX60	2
midnightblue.GO:0051352	GO:0051352	negative regulation of ligase activity	4/109	74/16119	0.00158255	0.0121877	0.00804077	PSMB10/PSME1/PSMB9/PSMB8	4
midnightblue.GO:0051444	GO:0051444	negative regulation of ubiquitin-protein transferase activity	4/109	74/16119	0.00158255	0.0121877	0.00804077	PSMB10/PSME1/PSMB9/PSMB8	4
midnightblue.GO:0042770	GO:0042770	signal transduction in response to DNA damage	5/109	125/16119	0.00158963	0.0121895	0.00804193	PSMB10/PSME1/PML/PSMB9/PSMB8	5
midnightblue.GO:0032846	GO:0032846	positive regulation of homeostatic process	4/109	75/16119	0.00166311	0.0126981	0.00837751	CXCL9/CXCL10/CXCL11/BAK1	4
midnightblue.GO:2000045	GO:2000045	regulation of G1/S transition of mitotic cell cycle	5/109	128/16119	0.00176483	0.0134172	0.00885192	PSMB10/PSME1/PML/PSMB9/PSMB8	5
midnightblue.GO:0032760	GO:0032760	positive regulation of tumor necrosis factor production	3/109	36/16119	0.00182579	0.013763	0.00908008	JAK2/RIPK2/MYD88	3
midnightblue.GO:0034121	GO:0034121	regulation of toll-like receptor signaling pathway	3/109	36/16119	0.00182579	0.013763	0.00908008	BIRC3/IRF1/IRF7	3
midnightblue.GO:0050865	GO:0050865	regulation of cell activation	9/109	411/16119	0.00188236	0.0141216	0.00931666	IL15RA/IDO1/IRF1/JAK2/CD47/PLSCR1/RIPK2/MYD88/HLA-A	9
midnightblue.GO:1902806	GO:1902806	regulation of cell cycle G1/S phase transition	5/109	130/16119	0.00188923	0.0141216	0.00931666	PSMB10/PSME1/PML/PSMB9/PSMB8	5
midnightblue.GO:0051439	GO:0051439	regulation of ubiquitin-protein ligase activity involved in mitotic cell cycle	4/109	78/16119	0.00192181	0.014305	0.00943763	PSMB10/PSME1/PSMB9/PSMB8	4
midnightblue.GO:0002664	GO:0002664	regulation of T cell tolerance induction	2/109	10/16119	0.00196802	0.0145274	0.00958438	IDO1/HLA-B	2
midnightblue.GO:0039531	GO:0039531	regulation of viral-induced cytoplasmic pattern recognition receptor signaling pathway	2/109	10/16119	0.00196802	0.0145274	0.00958438	BIRC3/DDX60	2
midnightblue.GO:0033238	GO:0033238	regulation of cellular amine metabolic process	4/109	82/16119	0.00230839	0.0169695	0.0111955	PSMB10/PSME1/PSMB9/PSMB8	4
midnightblue.GO:0071216	GO:0071216	cellular response to biotic stimulus	5/109	137/16119	0.00237556	0.0173889	0.0114722	STAT1/ICAM1/CXCL10/RIPK2/MYD88	5
midnightblue.GO:0002517	GO:0002517	T cell tolerance induction	2/109	11/16119	0.00239476	0.0173889	0.0114722	IDO1/HLA-B	2
midnightblue.GO:0032494	GO:0032494	response to peptidoglycan	2/109	11/16119	0.00239476	0.0173889	0.0114722	RIPK2/MYD88	2
midnightblue.GO:0031145	GO:0031145	anaphase-promoting complex-dependent proteasomal ubiquitin-dependent protein catabolic process	4/109	83/16119	0.0024128	0.0174487	0.0115117	PSMB10/PSME1/PSMB9/PSMB8	4
midnightblue.GO:0038034	GO:0038034	signal transduction in absence of ligand	4/109	84/16119	0.00252042	0.01808	0.0119282	TNFSF10/CX3CL1/IFI6/BAK1	4
midnightblue.GO:0097192	GO:0097192	extrinsic apoptotic signaling pathway in absence of ligand	4/109	84/16119	0.00252042	0.01808	0.0119282	TNFSF10/CX3CL1/IFI6/BAK1	4
midnightblue.GO:0007204	GO:0007204	positive regulation of cytosolic calcium ion concentration	6/109	204/16119	0.00262545	0.0187578	0.0123753	CXCL9/CXCL10/PML/CXCL11/JAK2/BAK1	6
midnightblue.GO:0002643	GO:0002643	regulation of tolerance induction	2/109	12/16119	0.00286105	0.0200524	0.0132294	IDO1/HLA-B	2
midnightblue.GO:0035458	GO:0035458	cellular response to interferon-beta	2/109	12/16119	0.00286105	0.0200524	0.0132294	STAT1/IRF1	2
midnightblue.GO:0039529	GO:0039529	RIG-I signaling pathway	2/109	12/16119	0.00286105	0.0200524	0.0132294	BIRC3/DDX60	2
midnightblue.GO:0044068	GO:0044068	modulation by symbiont of host cellular process	2/109	12/16119	0.00286105	0.0200524	0.0132294	EIF2AK2/TNIP1	2
midnightblue.GO:0051443	GO:0051443	positive regulation of ubiquitin-protein transferase activity	4/109	87/16119	0.00286301	0.0200524	0.0132294	PSMB10/PSME1/PSMB9/PSMB8	4
midnightblue.GO:0051348	GO:0051348	negative regulation of transferase activity	7/109	280/16119	0.00292403	0.0203994	0.0134584	PSMB10/TRIB2/PSME1/PML/PSMB9/PSMB8/ADAR	7
midnightblue.GO:0010332	GO:0010332	response to gamma radiation	3/109	43/16119	0.00304948	0.021109	0.0139265	CXCL10/PML/BAK1	3
midnightblue.GO:0051881	GO:0051881	regulation of mitochondrial membrane potential	3/109	43/16119	0.00304948	0.021109	0.0139265	CASP1/IFI6/BAK1	3
midnightblue.GO:0009306	GO:0009306	protein secretion	6/109	211/16119	0.00310278	0.0213947	0.014115	BTN3A1/CXCL10/CASP1/BTN3A2/RHBDF2/RNF19B	6
midnightblue.GO:0019933	GO:0019933	cAMP-mediated signaling	3/109	44/16119	0.00325665	0.0223691	0.0147578	CXCL9/CXCL10/CXCL11	3
midnightblue.GO:0045351	GO:0045351	type I interferon biosynthetic process	2/109	13/16119	0.00336635	0.0230336	0.0151963	IRF7/MYD88	2
midnightblue.GO:0051351	GO:0051351	positive regulation of ligase activity	4/109	92/16119	0.00350263	0.0238742	0.0157509	PSMB10/PSME1/PSMB9/PSMB8	4
midnightblue.GO:0016485	GO:0016485	protein processing	8/109	372/16119	0.00374776	0.0254476	0.0167889	TNFSF10/CASP1/TRIB2/NUB1/PML/JAK2/IFI27/BAK1	8
midnightblue.GO:0051480	GO:0051480	cytosolic calcium ion homeostasis	6/109	220/16119	0.00380845	0.0257613	0.0169959	CXCL9/CXCL10/PML/CXCL11/JAK2/BAK1	6
midnightblue.GO:0051241	GO:0051241	negative regulation of multicellular organismal process	8/109	374/16119	0.00387061	0.0260826	0.0172078	UBE2L6/BST2/STAT1/IDO1/IFIH1/NLRC5/JAK2/ISG15	8
midnightblue.GO:0031663	GO:0031663	lipopolysaccharide-mediated signaling pathway	3/109	47/16119	0.00392921	0.0263776	0.0174024	STAT1/RIPK2/MYD88	3
midnightblue.GO:0042098	GO:0042098	T cell proliferation	5/109	155/16119	0.00403751	0.0270028	0.0178149	BTN3A1/IDO1/IRF1/PSMB10/RIPK2	5
midnightblue.GO:2001236	GO:2001236	regulation of extrinsic apoptotic signaling pathway	5/109	156/16119	0.00414917	0.0276456	0.018239	TNFSF10/ICAM1/CX3CL1/PML/IFI6	5
midnightblue.GO:0002694	GO:0002694	regulation of leukocyte activation	8/109	381/16119	0.00432533	0.0287118	0.0189424	IL15RA/IDO1/IRF1/CD47/PLSCR1/RIPK2/MYD88/HLA-A	8
midnightblue.GO:0007050	GO:0007050	cell cycle arrest	6/109	228/16119	0.00453014	0.0299596	0.0197656	IRF1/PSMB10/PSME1/PML/PSMB9/PSMB8	6
midnightblue.GO:0046651	GO:0046651	lymphocyte proliferation	6/109	230/16119	0.00472534	0.0311347	0.0205409	BTN3A1/IDO1/IRF1/PSMB10/RIPK2/MYD88	6
midnightblue.GO:0032943	GO:0032943	mononuclear cell proliferation	6/109	232/16119	0.00492667	0.0323415	0.0213371	BTN3A1/IDO1/IRF1/PSMB10/RIPK2/MYD88	6
midnightblue.GO:0035872	GO:0035872	nucleotide-binding domain, leucine rich repeat containing receptor signaling pathway	3/109	51/16119	0.00494876	0.0323671	0.021354	BIRC3/CASP1/RIPK2	3
midnightblue.GO:0051604	GO:0051604	protein maturation	8/109	390/16119	0.00496936	0.0323827	0.0213643	TNFSF10/CASP1/TRIB2/NUB1/PML/JAK2/IFI27/BAK1	8
midnightblue.GO:0010818	GO:0010818	T cell chemotaxis	2/109	16/16119	0.00511095	0.0329434	0.0217342	CXCL10/CXCL11	2
midnightblue.GO:0032469	GO:0032469	endoplasmic reticulum calcium ion homeostasis	2/109	16/16119	0.00511095	0.0329434	0.0217342	PML/BAK1	2
midnightblue.GO:0051882	GO:0051882	mitochondrial depolarization	2/109	16/16119	0.00511095	0.0329434	0.0217342	CASP1/IFI6	2
midnightblue.GO:0032844	GO:0032844	regulation of homeostatic process	7/109	311/16119	0.00518556	0.0331769	0.0218883	CXCL9/CXCL10/PML/CXCL11/ISG15/IFI6/BAK1	7
midnightblue.GO:0051279	GO:0051279	regulation of release of sequestered calcium ion into cytosol	3/109	52/16119	0.0052262	0.0331769	0.0218883	CXCL9/CXCL10/CXCL11	3
midnightblue.GO:0072676	GO:0072676	lymphocyte migration	3/109	52/16119	0.0052262	0.0331769	0.0218883	CXCL10/CX3CL1/CXCL11	3
midnightblue.GO:0051438	GO:0051438	regulation of ubiquitin-protein transferase activity	4/109	103/16119	0.00523776	0.0331769	0.0218883	PSMB10/PSME1/PSMB9/PSMB8	4
midnightblue.GO:0071496	GO:0071496	cellular response to external stimulus	6/109	235/16119	0.00524043	0.0331769	0.0218883	OPTN/ICAM1/IRF1/CASP1/MYD88/BAK1	6
midnightblue.GO:0042110	GO:0042110	T cell activation	8/109	395/16119	0.00535765	0.0337988	0.0222985	BTN3A1/IDO1/ICAM1/IRF1/PSMB10/CD47/RIPK2/HLA-A	8
midnightblue.GO:0042089	GO:0042089	cytokine biosynthetic process	4/109	104/16119	0.00541938	0.0340674	0.0224758	IRF1/TRIB2/IRF7/MYD88	4
midnightblue.GO:0019935	GO:0019935	cyclic-nucleotide-mediated signaling	3/109	53/16119	0.00551283	0.0345328	0.0227828	CXCL9/CXCL10/CXCL11	3
midnightblue.GO:0010959	GO:0010959	regulation of metal ion transport	6/109	239/16119	0.0056813	0.0354633	0.0233967	CXCL9/ICAM1/CXCL10/PML/CXCL11/BAK1	6
midnightblue.GO:0001836	GO:0001836	release of cytochrome c from mitochondria	3/109	54/16119	0.00580874	0.036132	0.0238379	TNFSF10/IFI6/BAK1	3
midnightblue.GO:0034142	GO:0034142	toll-like receptor 4 signaling pathway	4/109	107/16119	0.00598944	0.0370153	0.0244206	BIRC3/RIPK2/IRF7/MYD88	4
midnightblue.GO:0070661	GO:0070661	leukocyte proliferation	6/109	242/16119	0.00602934	0.0370153	0.0244206	BTN3A1/IDO1/IRF1/PSMB10/RIPK2/MYD88	6
midnightblue.GO:0032642	GO:0032642	regulation of chemokine production	3/109	55/16119	0.00611401	0.0370153	0.0244206	EIF2AK2/RIPK2/MYD88	3
midnightblue.GO:0042107	GO:0042107	cytokine metabolic process	4/109	108/16119	0.006188	0.0370153	0.0244206	IRF1/TRIB2/IRF7/MYD88	4
midnightblue.GO:0051340	GO:0051340	regulation of ligase activity	4/109	108/16119	0.006188	0.0370153	0.0244206	PSMB10/PSME1/PSMB9/PSMB8	4
midnightblue.GO:0001919	GO:0001919	regulation of receptor recycling	2/109	18/16119	0.00645934	0.0370153	0.0244206	OPTN/VAMP3	2
midnightblue.GO:0002507	GO:0002507	tolerance induction	2/109	18/16119	0.00645934	0.0370153	0.0244206	IDO1/HLA-B	2
midnightblue.GO:0016045	GO:0016045	detection of bacterium	2/109	18/16119	0.00645934	0.0370153	0.0244206	HLA-B/HLA-A	2
midnightblue.GO:0000075	GO:0000075	cell cycle checkpoint	6/109	247/16119	0.00664367	0.0370153	0.0244206	PSMB10/PSME1/PML/PSMB9/FBXO6/PSMB8	6
midnightblue.GO:2001239	GO:2001239	regulation of extrinsic apoptotic signaling pathway in absence of ligand	3/109	57/16119	0.00675289	0.0370153	0.0244206	TNFSF10/CX3CL1/IFI6	3
midnightblue.GO:0002373	GO:0002373	plasmacytoid dendritic cell cytokine production	1/109	1/16119	0.00676221	0.0370153	0.0244206	BST2	1
midnightblue.GO:0002736	GO:0002736	regulation of plasmacytoid dendritic cell cytokine production	1/109	1/16119	0.00676221	0.0370153	0.0244206	BST2	1
midnightblue.GO:0002737	GO:0002737	negative regulation of plasmacytoid dendritic cell cytokine production	1/109	1/16119	0.00676221	0.0370153	0.0244206	BST2	1
midnightblue.GO:0020012	GO:0020012	evasion or tolerance of host immune response	1/109	1/16119	0.00676221	0.0370153	0.0244206	EIF2AK2	1
midnightblue.GO:0030682	GO:0030682	evasion or tolerance of host defense response	1/109	1/16119	0.00676221	0.0370153	0.0244206	EIF2AK2	1
midnightblue.GO:0030683	GO:0030683	evasion or tolerance by virus of host immune response	1/109	1/16119	0.00676221	0.0370153	0.0244206	EIF2AK2	1
midnightblue.GO:0032938	GO:0032938	negative regulation of translation in response to oxidative stress	1/109	1/16119	0.00676221	0.0370153	0.0244206	PML	1
midnightblue.GO:0034050	GO:0034050	host programmed cell death induced by symbiont	1/109	1/16119	0.00676221	0.0370153	0.0244206	JAK2	1
midnightblue.GO:0034127	GO:0034127	regulation of MyD88-independent toll-like receptor signaling pathway	1/109	1/16119	0.00676221	0.0370153	0.0244206	IRF7	1
midnightblue.GO:0034240	GO:0034240	negative regulation of macrophage fusion	1/109	1/16119	0.00676221	0.0370153	0.0244206	STAT1	1
midnightblue.GO:0034275	GO:0034275	kynurenic acid metabolic process	1/109	1/16119	0.00676221	0.0370153	0.0244206	IDO1	1
midnightblue.GO:0034276	GO:0034276	kynurenic acid biosynthetic process	1/109	1/16119	0.00676221	0.0370153	0.0244206	IDO1	1
midnightblue.GO:0035406	GO:0035406	histone-tyrosine phosphorylation	1/109	1/16119	0.00676221	0.0370153	0.0244206	JAK2	1
midnightblue.GO:0035409	GO:0035409	histone H3-Y41 phosphorylation	1/109	1/16119	0.00676221	0.0370153	0.0244206	JAK2	1
midnightblue.GO:0036269	GO:0036269	swimming behavior	1/109	1/16119	0.00676221	0.0370153	0.0244206	IDO1	1
midnightblue.GO:0043556	GO:0043556	regulation of translation in response to oxidative stress	1/109	1/16119	0.00676221	0.0370153	0.0244206	PML	1
midnightblue.GO:0044501	GO:0044501	modulation of signal transduction in other organism	1/109	1/16119	0.00676221	0.0370153	0.0244206	TNIP1	1
midnightblue.GO:0045081	GO:0045081	negative regulation of interleukin-10 biosynthetic process	1/109	1/16119	0.00676221	0.0370153	0.0244206	TRIB2	1
midnightblue.GO:0050822	GO:0050822	peptide stabilization	1/109	1/16119	0.00676221	0.0370153	0.0244206	TAPBP	1
midnightblue.GO:0050823	GO:0050823	peptide antigen stabilization	1/109	1/16119	0.00676221	0.0370153	0.0244206	TAPBP	1
midnightblue.GO:0051041	GO:0051041	positive regulation of calcium-independent cell-cell adhesion	1/109	1/16119	0.00676221	0.0370153	0.0244206	CX3CL1	1
midnightblue.GO:0051805	GO:0051805	evasion or tolerance of immune response of other organism involved in symbiotic interaction	1/109	1/16119	0.00676221	0.0370153	0.0244206	EIF2AK2	1
midnightblue.GO:0051807	GO:0051807	evasion or tolerance of defense response of other organism involved in symbiotic interaction	1/109	1/16119	0.00676221	0.0370153	0.0244206	EIF2AK2	1
midnightblue.GO:0052027	GO:0052027	modulation by symbiont of host signal transduction pathway	1/109	1/16119	0.00676221	0.0370153	0.0244206	TNIP1	1
midnightblue.GO:0052250	GO:0052250	modulation of signal transduction in other organism involved in symbiotic interaction	1/109	1/16119	0.00676221	0.0370153	0.0244206	TNIP1	1
midnightblue.GO:0085032	GO:0085032	modulation by symbiont of host I-kappaB kinase/NF-kappaB cascade	1/109	1/16119	0.00676221	0.0370153	0.0244206	TNIP1	1
midnightblue.GO:0090557	GO:0090557	establishment of endothelial intestinal barrier	1/109	1/16119	0.00676221	0.0370153	0.0244206	MYD88	1
midnightblue.GO:1900225	GO:1900225	regulation of NLRP3 inflammasome complex assembly	1/109	1/16119	0.00676221	0.0370153	0.0244206	EIF2AK2	1
midnightblue.GO:1990166	GO:1990166	protein localization to site of double-strand break	1/109	1/16119	0.00676221	0.0370153	0.0244206	PARP3	1
midnightblue.GO:0031348	GO:0031348	negative regulation of defense response	4/109	111/16119	0.00680981	0.0371615	0.0245171	HLA-E/EIF2AK2/HLA-B/HLA-A	4
midnightblue.GO:0007093	GO:0007093	mitotic cell cycle checkpoint	5/109	176/16119	0.00687348	0.0373942	0.0246706	PSMB10/PSME1/PML/PSMB9/PSMB8	5
midnightblue.GO:0045765	GO:0045765	regulation of angiogenesis	5/109	177/16119	0.00703603	0.038115	0.0251461	WARS/STAT1/CXCL10/CX3CL1/PML	5
midnightblue.GO:0002521	GO:0002521	leukocyte differentiation	8/109	414/16119	0.00704881	0.038115	0.0251461	IL15RA/IRF1/RIPK2/BATF2/IRF7/SBNO2/HLA-B/BAK1	8
midnightblue.GO:0098543	GO:0098543	detection of other organism	2/109	19/16119	0.00718757	0.0387475	0.0255635	HLA-B/HLA-A	2
midnightblue.GO:0043331	GO:0043331	response to dsRNA	3/109	60/16119	0.00778317	0.0418316	0.0275981	STAT1/RIPK2/ADAR	3
midnightblue.GO:0051249	GO:0051249	regulation of lymphocyte activation	7/109	336/16119	0.00781174	0.0418587	0.027616	IL15RA/IDO1/IRF1/CD47/RIPK2/MYD88/HLA-A	7
midnightblue.GO:0046640	GO:0046640	regulation of alpha-beta T cell proliferation	2/109	20/16119	0.00795115	0.0424778	0.0280245	IRF1/RIPK2	2
midnightblue.GO:0032388	GO:0032388	positive regulation of intracellular transport	5/109	184/16119	0.00824995	0.0439421	0.0289905	CXCL9/CXCL10/CXCL11/JAK2/BAK1	5
midnightblue.GO:0032602	GO:0032602	chemokine production	3/109	62/16119	0.00851874	0.0452383	0.0298457	EIF2AK2/RIPK2/MYD88	3
midnightblue.GO:0042157	GO:0042157	lipoprotein metabolic process	4/109	119/16119	0.0086667	0.0458871	0.0302737	APOL2/OAS2/APOL1/APOL6	4
midnightblue.GO:0045341	GO:0045341	MHC class I biosynthetic process	2/109	21/16119	0.00874958	0.0460518	0.0303824	NLRC5/PML	2
midnightblue.GO:0045343	GO:0045343	regulation of MHC class I biosynthetic process	2/109	21/16119	0.00874958	0.0460518	0.0303824	NLRC5/PML	2
midnightblue.GO:0016525	GO:0016525	negative regulation of angiogenesis	3/109	63/16119	0.00890132	0.0467122	0.0308181	STAT1/CXCL10/PML	3
midnightblue.GO:0000209	GO:0000209	protein polyubiquitination	5/109	188/16119	0.00900531	0.0471189	0.0310864	TRIM21/PSMB10/PSME1/PSMB9/PSMB8	5
midnightblue.GO:0050867	GO:0050867	positive regulation of cell activation	6/109	264/16119	0.00907452	0.0473418	0.0312335	IL15RA/JAK2/CD47/RIPK2/MYD88/HLA-A	6
midnightblue.GO:0034612	GO:0034612	response to tumor necrosis factor	4/109	121/16119	0.0091777	0.0477401	0.0314963	STAT1/ICAM1/NUB1/JAK2	4
midnightblue.GO:2001233	GO:2001233	regulation of apoptotic signaling pathway	7/109	347/16119	0.00923611	0.0479039	0.0316043	TNFSF10/ICAM1/CX3CL1/PML/JAK2/IFI6/BAK1	7
midnightblue.GO:0061028	GO:0061028	establishment of endothelial barrier	2/109	22/16119	0.00958236	0.0495553	0.0326938	ICAM1/MYD88	2
purple.GO:0006415	GO:0006415	translational termination	56/161	95/16119	1.04786e-90	2.02026e-87	1.83761e-87	RPS25/RPS23/RPL27/RPL35A/RPL6/RPL15/RPL26L1/RPL10A/RPS27/FAU/RPS9/RPL35/RPL27A/RPS14/RPLP2/RPL8/RPS24/RPL24/RPL32/RPL14/RPL36A/RPL9/RPS18/RPS11/RPL23A/RPS15/RPL7/RPL3/RPS16/RPL37/RPS7/RPL11/RPL36/RPS15A/RPS19/RPLP0/RPS28/RPS4X/RPL12/RPS12/RPL37A/RPS29/RPL29/RPL18/RPS5/RPLP1/RPS17/RPL34/RPS3/RPL31/RPS10/RPS6/RPL22/RPL39/RPS27A/RPL38	56
purple.GO:0006614	GO:0006614	SRP-dependent cotranslational protein targeting to membrane	56/161	107/16119	1.51409e-86	1.45958e-83	1.32762e-83	RPS25/RPS23/RPL27/RPL35A/RPL6/RPL15/RPL26L1/RPL10A/RPS27/FAU/RPS9/RPL35/RPL27A/RPS14/RPLP2/RPL8/RPS24/RPL24/RPL32/RPL14/RPL36A/RPL9/RPS18/RPS11/RPL23A/RPS15/RPL7/RPL3/RPS16/RPL37/RPS7/RPL11/RPL36/RPS15A/RPS19/RPLP0/RPS28/RPS4X/RPL12/RPS12/RPL37A/RPS29/RPL29/RPL18/RPS5/RPLP1/RPS17/RPL34/RPS3/RPL31/RPS10/RPS6/RPL22/RPL39/RPS27A/RPL38	56
purple.GO:0006414	GO:0006414	translational elongation	58/161	123/16119	3.32331e-86	2.13578e-83	1.94268e-83	RPS25/RPS23/RPL27/RPL35A/EEF1A1/EEF2/RPL6/RPL15/RPL26L1/RPL10A/RPS27/FAU/RPS9/RPL35/RPL27A/RPS14/RPLP2/RPL8/RPS24/RPL24/RPL32/RPL14/RPL36A/RPL9/RPS18/RPS11/RPL23A/RPS15/RPL7/RPL3/RPS16/RPL37/RPS7/RPL11/RPL36/RPS15A/RPS19/RPLP0/RPS28/RPS4X/RPL12/RPS12/RPL37A/RPS29/RPL29/RPL18/RPS5/RPLP1/RPS17/RPL34/RPS3/RPL31/RPS10/RPS6/RPL22/RPL39/RPS27A/RPL38	58
purple.GO:0006613	GO:0006613	cotranslational protein targeting to membrane	56/161	109/16119	6.38423e-86	3.0772e-83	2.79898e-83	RPS25/RPS23/RPL27/RPL35A/RPL6/RPL15/RPL26L1/RPL10A/RPS27/FAU/RPS9/RPL35/RPL27A/RPS14/RPLP2/RPL8/RPS24/RPL24/RPL32/RPL14/RPL36A/RPL9/RPS18/RPS11/RPL23A/RPS15/RPL7/RPL3/RPS16/RPL37/RPS7/RPL11/RPL36/RPS15A/RPS19/RPLP0/RPS28/RPS4X/RPL12/RPS12/RPL37A/RPS29/RPL29/RPL18/RPS5/RPLP1/RPS17/RPL34/RPS3/RPL31/RPS10/RPS6/RPL22/RPL39/RPS27A/RPL38	56
purple.GO:0045047	GO:0045047	protein targeting to ER	56/161	110/16119	1.29211e-85	4.98239e-83	4.53192e-83	RPS25/RPS23/RPL27/RPL35A/RPL6/RPL15/RPL26L1/RPL10A/RPS27/FAU/RPS9/RPL35/RPL27A/RPS14/RPLP2/RPL8/RPS24/RPL24/RPL32/RPL14/RPL36A/RPL9/RPS18/RPS11/RPL23A/RPS15/RPL7/RPL3/RPS16/RPL37/RPS7/RPL11/RPL36/RPS15A/RPS19/RPLP0/RPS28/RPS4X/RPL12/RPS12/RPL37A/RPS29/RPL29/RPL18/RPS5/RPLP1/RPS17/RPL34/RPS3/RPL31/RPS10/RPS6/RPL22/RPL39/RPS27A/RPL38	56
purple.GO:0072599	GO:0072599	establishment of protein localization to endoplasmic reticulum	56/161	111/16119	2.59092e-85	8.32549e-83	7.57276e-83	RPS25/RPS23/RPL27/RPL35A/RPL6/RPL15/RPL26L1/RPL10A/RPS27/FAU/RPS9/RPL35/RPL27A/RPS14/RPLP2/RPL8/RPS24/RPL24/RPL32/RPL14/RPL36A/RPL9/RPS18/RPS11/RPL23A/RPS15/RPL7/RPL3/RPS16/RPL37/RPS7/RPL11/RPL36/RPS15A/RPS19/RPLP0/RPS28/RPS4X/RPL12/RPS12/RPL37A/RPS29/RPL29/RPL18/RPS5/RPLP1/RPS17/RPL34/RPS3/RPL31/RPS10/RPS6/RPL22/RPL39/RPS27A/RPL38	56
purple.GO:0000184	GO:0000184	nuclear-transcribed mRNA catabolic process, nonsense-mediated decay	56/161	118/16119	2.65466e-83	7.31169e-81	6.65062e-81	RPS25/RPS23/RPL27/RPL35A/RPL6/RPL15/RPL26L1/RPL10A/RPS27/FAU/RPS9/RPL35/RPL27A/RPS14/RPLP2/RPL8/RPS24/RPL24/RPL32/RPL14/RPL36A/RPL9/RPS18/RPS11/RPL23A/RPS15/RPL7/RPL3/RPS16/RPL37/RPS7/RPL11/RPL36/RPS15A/RPS19/RPLP0/RPS28/RPS4X/RPL12/RPS12/RPL37A/RPS29/RPL29/RPL18/RPS5/RPLP1/RPS17/RPL34/RPS3/RPL31/RPS10/RPS6/RPL22/RPL39/RPS27A/RPL38	56
purple.GO:0070972	GO:0070972	protein localization to endoplasmic reticulum	56/161	128/16119	1.05272e-80	2.53705e-78	2.30767e-78	RPS25/RPS23/RPL27/RPL35A/RPL6/RPL15/RPL26L1/RPL10A/RPS27/FAU/RPS9/RPL35/RPL27A/RPS14/RPLP2/RPL8/RPS24/RPL24/RPL32/RPL14/RPL36A/RPL9/RPS18/RPS11/RPL23A/RPS15/RPL7/RPL3/RPS16/RPL37/RPS7/RPL11/RPL36/RPS15A/RPS19/RPLP0/RPS28/RPS4X/RPL12/RPS12/RPL37A/RPS29/RPL29/RPL18/RPS5/RPLP1/RPS17/RPL34/RPS3/RPL31/RPS10/RPS6/RPL22/RPL39/RPS27A/RPL38	56
purple.GO:0006413	GO:0006413	translational initiation	58/161	171/16119	9.25044e-76	1.98165e-73	1.80248e-73	EIF3F/RPS25/RPS23/RPL27/RPL35A/RPL6/EIF4B/RPL15/RPL26L1/RPL10A/RPS27/FAU/RPS9/RPL35/RPL27A/RPS14/RPLP2/RPL8/RPS24/RPL24/RPL32/RPL14/RPL36A/RPL9/RPS18/RPS11/RPL23A/RPS15/RPL7/RPL3/RPS16/RPL37/RPS7/RPL11/RPL36/RPS15A/RPS19/RPLP0/RPS28/RPS4X/RPL12/RPS12/RPL37A/RPS29/RPL29/RPL18/RPS5/RPLP1/RPS17/RPL34/RPS3/RPL31/RPS10/RPS6/RPL22/RPL39/RPS27A/RPL38	58
purple.GO:0019080	GO:0019080	viral gene expression	57/161	170/16119	4.8133e-74	9.28004e-72	8.441e-72	RPS25/RPS23/RPL27/RPL35A/RPL6/RPL15/RPL26L1/RPL10A/RPS27/FAU/RPS9/RPL35/RPL27A/UBC/RPS14/RPLP2/RPL8/RPS24/RPL24/RPL32/RPL14/RPL36A/RPL9/RPS18/RPS11/RPL23A/RPS15/RPL7/RPL3/RPS16/RPL37/RPS7/RPL11/RPL36/RPS15A/RPS19/RPLP0/RPS28/RPS4X/RPL12/RPS12/RPL37A/RPS29/RPL29/RPL18/RPS5/RPLP1/RPS17/RPL34/RPS3/RPL31/RPS10/RPS6/RPL22/RPL39/RPS27A/RPL38	57
purple.GO:0019083	GO:0019083	viral transcription	56/161	160/16119	6.22018e-74	1.09023e-71	9.91658e-72	RPS25/RPS23/RPL27/RPL35A/RPL6/RPL15/RPL26L1/RPL10A/RPS27/FAU/RPS9/RPL35/RPL27A/RPS14/RPLP2/RPL8/RPS24/RPL24/RPL32/RPL14/RPL36A/RPL9/RPS18/RPS11/RPL23A/RPS15/RPL7/RPL3/RPS16/RPL37/RPS7/RPL11/RPL36/RPS15A/RPS19/RPLP0/RPS28/RPS4X/RPL12/RPS12/RPL37A/RPS29/RPL29/RPL18/RPS5/RPLP1/RPS17/RPL34/RPS3/RPL31/RPS10/RPS6/RPL22/RPL39/RPS27A/RPL38	56
purple.GO:0000956	GO:0000956	nuclear-transcribed mRNA catabolic process	58/161	184/16119	1.43815e-73	2.31063e-71	2.10172e-71	RPS25/RPS23/RPL27/RPL35A/RPL6/EIF4B/RPL15/RPL26L1/RPL10A/RPS27/FAU/RPS9/RPL35/RPL27A/RPS14/RPLP2/RPL8/RPS24/RPL24/RPL32/RPL14/RPL36A/RPL9/RPS18/RPS11/RPL23A/RPS15/RPL7/RPL3/RPS16/RPL37/RPS7/RPL11/RPL36/RPS15A/RPS19/RPLP0/RPS28/EDC4/RPS4X/RPL12/RPS12/RPL37A/RPS29/RPL29/RPL18/RPS5/RPLP1/RPS17/RPL34/RPS3/RPL31/RPS10/RPS6/RPL22/RPL39/RPS27A/RPL38	58
purple.GO:0044033	GO:0044033	multi-organism metabolic process	57/161	180/16119	2.29512e-72	3.40385e-70	3.0961e-70	RPS25/RPS23/RPL27/RPL35A/RPL6/RPL15/RPL26L1/RPL10A/RPS27/FAU/RPS9/RPL35/RPL27A/UBC/RPS14/RPLP2/RPL8/RPS24/RPL24/RPL32/RPL14/RPL36A/RPL9/RPS18/RPS11/RPL23A/RPS15/RPL7/RPL3/RPS16/RPL37/RPS7/RPL11/RPL36/RPS15A/RPS19/RPLP0/RPS28/RPS4X/RPL12/RPS12/RPL37A/RPS29/RPL29/RPL18/RPS5/RPLP1/RPS17/RPL34/RPS3/RPL31/RPS10/RPS6/RPL22/RPL39/RPS27A/RPL38	57
purple.GO:0006402	GO:0006402	mRNA catabolic process	58/161	196/16119	1.04147e-71	1.43426e-69	1.30458e-69	RPS25/RPS23/RPL27/RPL35A/RPL6/EIF4B/RPL15/RPL26L1/RPL10A/RPS27/FAU/RPS9/RPL35/RPL27A/RPS14/RPLP2/RPL8/RPS24/RPL24/RPL32/RPL14/RPL36A/RPL9/RPS18/RPS11/RPL23A/RPS15/RPL7/RPL3/RPS16/RPL37/RPS7/RPL11/RPL36/RPS15A/RPS19/RPLP0/RPS28/EDC4/RPS4X/RPL12/RPS12/RPL37A/RPS29/RPL29/RPL18/RPS5/RPLP1/RPS17/RPL34/RPS3/RPL31/RPS10/RPS6/RPL22/RPL39/RPS27A/RPL38	58
purple.GO:0006612	GO:0006612	protein targeting to membrane	56/161	174/16119	1.70195e-71	2.18758e-69	1.98979e-69	RPS25/RPS23/RPL27/RPL35A/RPL6/RPL15/RPL26L1/RPL10A/RPS27/FAU/RPS9/RPL35/RPL27A/RPS14/RPLP2/RPL8/RPS24/RPL24/RPL32/RPL14/RPL36A/RPL9/RPS18/RPS11/RPL23A/RPS15/RPL7/RPL3/RPS16/RPL37/RPS7/RPL11/RPL36/RPS15A/RPS19/RPLP0/RPS28/RPS4X/RPL12/RPS12/RPL37A/RPS29/RPL29/RPL18/RPS5/RPLP1/RPS17/RPL34/RPS3/RPL31/RPS10/RPS6/RPL22/RPL39/RPS27A/RPL38	56
purple.GO:0043624	GO:0043624	cellular protein complex disassembly	56/161	179/16119	1.10376e-70	1.33003e-68	1.20978e-68	RPS25/RPS23/RPL27/RPL35A/RPL6/RPL15/RPL26L1/RPL10A/RPS27/FAU/RPS9/RPL35/RPL27A/RPS14/RPLP2/RPL8/RPS24/RPL24/RPL32/RPL14/RPL36A/RPL9/RPS18/RPS11/RPL23A/RPS15/RPL7/RPL3/RPS16/RPL37/RPS7/RPL11/RPL36/RPS15A/RPS19/RPLP0/RPS28/RPS4X/RPL12/RPS12/RPL37A/RPS29/RPL29/RPL18/RPS5/RPLP1/RPS17/RPL34/RPS3/RPL31/RPS10/RPS6/RPL22/RPL39/RPS27A/RPL38	56
purple.GO:0006401	GO:0006401	RNA catabolic process	58/161	226/16119	1.31947e-67	1.49644e-65	1.36114e-65	RPS25/RPS23/RPL27/RPL35A/RPL6/EIF4B/RPL15/RPL26L1/RPL10A/RPS27/FAU/RPS9/RPL35/RPL27A/RPS14/RPLP2/RPL8/RPS24/RPL24/RPL32/RPL14/RPL36A/RPL9/RPS18/RPS11/RPL23A/RPS15/RPL7/RPL3/RPS16/RPL37/RPS7/RPL11/RPL36/RPS15A/RPS19/RPLP0/RPS28/EDC4/RPS4X/RPL12/RPS12/RPL37A/RPS29/RPL29/RPL18/RPS5/RPLP1/RPS17/RPL34/RPS3/RPL31/RPS10/RPS6/RPL22/RPL39/RPS27A/RPL38	58
purple.GO:0043241	GO:0043241	protein complex disassembly	56/161	202/16119	2.81935e-67	3.01983e-65	2.7468e-65	RPS25/RPS23/RPL27/RPL35A/RPL6/RPL15/RPL26L1/RPL10A/RPS27/FAU/RPS9/RPL35/RPL27A/RPS14/RPLP2/RPL8/RPS24/RPL24/RPL32/RPL14/RPL36A/RPL9/RPS18/RPS11/RPL23A/RPS15/RPL7/RPL3/RPS16/RPL37/RPS7/RPL11/RPL36/RPS15A/RPS19/RPLP0/RPS28/RPS4X/RPL12/RPS12/RPL37A/RPS29/RPL29/RPL18/RPS5/RPLP1/RPS17/RPL34/RPS3/RPL31/RPS10/RPS6/RPL22/RPL39/RPS27A/RPL38	56
purple.GO:0032984	GO:0032984	macromolecular complex disassembly	56/161	212/16119	6.14235e-66	6.23287e-64	5.66934e-64	RPS25/RPS23/RPL27/RPL35A/RPL6/RPL15/RPL26L1/RPL10A/RPS27/FAU/RPS9/RPL35/RPL27A/RPS14/RPLP2/RPL8/RPS24/RPL24/RPL32/RPL14/RPL36A/RPL9/RPS18/RPS11/RPL23A/RPS15/RPL7/RPL3/RPS16/RPL37/RPS7/RPL11/RPL36/RPS15A/RPS19/RPLP0/RPS28/RPS4X/RPL12/RPS12/RPL37A/RPS29/RPL29/RPL18/RPS5/RPLP1/RPS17/RPL34/RPS3/RPL31/RPS10/RPS6/RPL22/RPL39/RPS27A/RPL38	56
purple.GO:0090150	GO:0090150	establishment of protein localization to membrane	57/161	301/16119	4.16204e-58	4.0122e-56	3.64945e-56	RPS25/RPS23/RPL27/RPL35A/RPL6/RPL15/RPL26L1/RPL10A/RPS27/FAU/RPS9/RPL35/RPL27A/RPS14/RPLP2/RPL8/RPS24/RPL24/RPL32/RPL14/RPL36A/RPL9/RPS18/LAMA5/RPS11/RPL23A/RPS15/RPL7/RPL3/RPS16/RPL37/RPS7/RPL11/RPL36/RPS15A/RPS19/RPLP0/RPS28/RPS4X/RPL12/RPS12/RPL37A/RPS29/RPL29/RPL18/RPS5/RPLP1/RPS17/RPL34/RPS3/RPL31/RPS10/RPS6/RPL22/RPL39/RPS27A/RPL38	57
purple.GO:0019058	GO:0019058	viral life cycle	57/161	315/16119	6.64063e-57	6.09673e-55	5.54551e-55	RPS25/RPS23/RPL27/RPL35A/RPL6/RPL15/RPL26L1/RPL10A/RPS27/FAU/RPS9/RPL35/RPL27A/UBC/RPS14/RPLP2/RPL8/RPS24/RPL24/RPL32/RPL14/RPL36A/RPL9/RPS18/RPS11/RPL23A/RPS15/RPL7/RPL3/RPS16/RPL37/RPS7/RPL11/RPL36/RPS15A/RPS19/RPLP0/RPS28/RPS4X/RPL12/RPS12/RPL37A/RPS29/RPL29/RPL18/RPS5/RPLP1/RPS17/RPL34/RPS3/RPL31/RPS10/RPS6/RPL22/RPL39/RPS27A/RPL38	57
purple.GO:0072657	GO:0072657	protein localization to membrane	59/161	380/16119	6.75489e-55	5.91974e-53	5.38452e-53	CLTC/RPS25/RPS23/RPL27/RPL35A/RPL6/RPL15/RPL26L1/AGRN/RPL10A/RPS27/FAU/RPS9/RPL35/RPL27A/RPS14/RPLP2/RPL8/RPS24/RPL24/RPL32/RPL14/RPL36A/RPL9/RPS18/LAMA5/RPS11/RPL23A/RPS15/RPL7/RPL3/RPS16/RPL37/RPS7/RPL11/RPL36/RPS15A/RPS19/RPLP0/RPS28/RPS4X/RPL12/RPS12/RPL37A/RPS29/RPL29/RPL18/RPS5/RPLP1/RPS17/RPL34/RPS3/RPL31/RPS10/RPS6/RPL22/RPL39/RPS27A/RPL38	59
purple.GO:0072594	GO:0072594	establishment of protein localization to organelle	61/161	472/16119	7.00741e-52	5.87404e-50	5.34295e-50	RPS25/RPS23/RPL27/RPL35A/RPL6/STAT3/RPL15/RPL26L1/RPL10A/DAG1/RPS27/FAU/RPS9/RPL35/RPL27A/RPS14/RPLP2/RPL8/RPS24/RPL24/RPL32/RPL14/RPL36A/RPL9/RPS18/RPS11/RPL23A/RPS15/RPL7/RPL3/RPS16/RPL37/MFN2/RPS7/RPL11/RPL36/SCARB2/RPS15A/RPS19/RPLP0/RPS28/RPS4X/RPL12/RPS12/SMAD3/RPL37A/RPS29/RPL29/RPL18/RPS5/RPLP1/RPS17/RPL34/RPS3/RPL31/RPS10/RPS6/RPL22/RPL39/RPS27A/RPL38	61
purple.GO:1902578	GO:1902578	single-organism localization	59/161	440/16119	5.18356e-51	3.99756e-49	3.63613e-49	CLTC/RPS25/RPS23/RPL27/RPL35A/RPL6/RPL15/RPL26L1/AGRN/RPL10A/RPS27/FAU/RPS9/RPL35/RPL27A/RPS14/RPLP2/RPL8/RPS24/RPL24/RPL32/RPL14/RPL36A/RPL9/RPS18/LAMA5/RPS11/RPL23A/RPS15/RPL7/RPL3/RPS16/RPL37/RPS7/RPL11/RPL36/RPS15A/RPS19/RPLP0/RPS28/RPS4X/RPL12/RPS12/RPL37A/RPS29/RPL29/RPL18/RPS5/RPLP1/RPS17/RPL34/RPS3/RPL31/RPS10/RPS6/RPL22/RPL39/RPS27A/RPL38	59
purple.GO:1902580	GO:1902580	single-organism cellular localization	59/161	440/16119	5.18356e-51	3.99756e-49	3.63613e-49	CLTC/RPS25/RPS23/RPL27/RPL35A/RPL6/RPL15/RPL26L1/AGRN/RPL10A/RPS27/FAU/RPS9/RPL35/RPL27A/RPS14/RPLP2/RPL8/RPS24/RPL24/RPL32/RPL14/RPL36A/RPL9/RPS18/LAMA5/RPS11/RPL23A/RPS15/RPL7/RPL3/RPS16/RPL37/RPS7/RPL11/RPL36/RPS15A/RPS19/RPLP0/RPS28/RPS4X/RPL12/RPS12/RPL37A/RPS29/RPL29/RPL18/RPS5/RPLP1/RPS17/RPL34/RPS3/RPL31/RPS10/RPS6/RPL22/RPL39/RPS27A/RPL38	59
purple.GO:0022411	GO:0022411	cellular component disassembly	57/161	443/16119	4.08532e-48	3.02942e-46	2.75552e-46	RPS25/RPS23/RPL27/RPL35A/RPL6/RPL15/RPL26L1/RPL10A/RPS27/FAU/RPS9/RPL35/RPL27A/RPS14/RPLP2/RPL8/RPS24/RPL24/RPL32/RPL14/RPL36A/RPL9/RPS18/LAMA5/RPS11/RPL23A/RPS15/RPL7/RPL3/RPS16/RPL37/RPS7/RPL11/RPL36/RPS15A/RPS19/RPLP0/RPS28/RPS4X/RPL12/RPS12/RPL37A/RPS29/RPL29/RPL18/RPS5/RPLP1/RPS17/RPL34/RPS3/RPL31/RPS10/RPS6/RPL22/RPL39/RPS27A/RPL38	57
purple.GO:0042274	GO:0042274	ribosomal small subunit biogenesis	11/161	23/16119	8.52074e-17	6.08444e-15	5.53433e-15	RPS25/RPS14/RPS24/RPS15/RPS16/RPS7/RPS19/RPS28/RPS17/RPS6/RPL38	11
purple.GO:0042254	GO:0042254	ribosome biogenesis	20/161	171/16119	4.79912e-16	3.30454e-14	3.00577e-14	NSA2/RPS25/RPL35A/RSL24D1/RPS14/RPS24/RPL24/RPL14/RPS18/RPS15/RPL7/RPS16/RPS7/RPL11/RPS19/RPLP0/RPS28/RPS17/RPS6/RPL38	20
purple.GO:0022613	GO:0022613	ribonucleoprotein complex biogenesis	21/161	284/16119	8.46523e-13	5.62792e-11	5.11908e-11	NSA2/EIF3F/RPS25/RPL35A/RSL24D1/RPS14/RPS24/RPL24/RPL14/RPS18/RPS15/RPL7/RPS16/RPS7/RPL11/RPS19/RPLP0/RPS28/RPS17/RPS6/RPL38	21
purple.GO:0006364	GO:0006364	rRNA processing	14/161	120/16119	1.49315e-11	9.59597e-10	8.72837e-10	NSA2/RPL35A/RPS14/RPS24/RPL14/RPS15/RPL7/RPS16/RPS7/RPL11/RPS19/RPS28/RPS17/RPS6	14
purple.GO:0000028	GO:0000028	ribosomal small subunit assembly	6/161	8/16119	2.49096e-11	1.54922e-09	1.40915e-09	RPS25/RPS14/RPS19/RPS17/RPS6/RPL38	6
purple.GO:0016072	GO:0016072	rRNA metabolic process	14/161	126/16119	2.91979e-11	1.75917e-09	1.60012e-09	NSA2/RPL35A/RPS14/RPS24/RPL14/RPS15/RPL7/RPS16/RPS7/RPL11/RPS19/RPS28/RPS17/RPS6	14
purple.GO:0042255	GO:0042255	ribosome assembly	7/161	20/16119	6.04749e-10	3.5332e-08	3.21375e-08	RPS25/RPS14/RPL24/RPS19/RPS17/RPS6/RPL38	7
purple.GO:0042273	GO:0042273	ribosomal large subunit biogenesis	6/161	16/16119	6.66785e-09	3.78106e-07	3.43921e-07	RPL35A/RPL24/RPL14/RPL7/RPL11/RPL38	6
purple.GO:0034470	GO:0034470	ncRNA processing	15/161	239/16119	1.71898e-08	9.46911e-07	8.61298e-07	NSA2/RPL35A/RPS14/RPS24/RPL14/RPS15/RPL7/RPS16/RPS7/RPL11/RPS19/RPS28/SMAD3/RPS17/RPS6	15
purple.GO:0034660	GO:0034660	ncRNA metabolic process	15/161	332/16119	1.21672e-06	6.5162e-05	5.92705e-05	NSA2/RPL35A/RPS14/RPS24/RPL14/RPS15/RPL7/RPS16/RPS7/RPL11/RPS19/RPS28/SMAD3/RPS17/RPS6	15
purple.GO:0022618	GO:0022618	ribonucleoprotein complex assembly	8/161	136/16119	6.63916e-05	0.00345954	0.00314675	EIF3F/RPS25/RPS14/RPL24/RPS19/RPS17/RPS6/RPL38	8
purple.GO:0071826	GO:0071826	ribonucleoprotein complex subunit organization	8/161	143/16119	9.45086e-05	0.00479507	0.00436153	EIF3F/RPS25/RPS14/RPL24/RPS19/RPS17/RPS6/RPL38	8
purple.GO:0000027	GO:0000027	ribosomal large subunit assembly	2/161	2/16119	9.91509e-05	0.00490161	0.00445844	RPL24/RPL38	2
purple.GO:0000271	GO:0000271	polysaccharide biosynthetic process	6/161	77/16119	0.000119442	0.00575708	0.00523657	CLTC/PGM1/UBC/EXT2/EXT1/RPS27A	6
purple.GO:0030490	GO:0030490	maturation of SSU-rRNA	3/161	11/16119	0.000152157	0.0071551	0.00650819	RPS14/RPS24/RPS19	3
purple.GO:0005976	GO:0005976	polysaccharide metabolic process	7/161	116/16119	0.000163121	0.00748803	0.00681102	CLTC/PYGB/PGM1/UBC/EXT2/EXT1/RPS27A	7
purple.GO:0015014	GO:0015014	heparan sulfate proteoglycan biosynthetic process, polysaccharide chain biosynthetic process	2/161	3/16119	0.000295496	0.0132492	0.0120513	EXT2/EXT1	2
purple.GO:0006417	GO:0006417	regulation of translation	10/161	262/16119	0.000306361	0.0134242	0.0122105	EIF3F/RPS27L/EEF2/APP/EIF4B/RPS9/RPS14/RPS4X/RPS5/RPL38	10
purple.GO:0044264	GO:0044264	cellular polysaccharide metabolic process	6/161	103/16119	0.0005822	0.024944	0.0226888	PYGB/PGM1/UBC/EXT2/EXT1/RPS27A	6
purple.GO:0033692	GO:0033692	cellular polysaccharide biosynthetic process	5/161	70/16119	0.000670032	0.0280831	0.025544	PGM1/UBC/EXT2/EXT1/RPS27A	5
purple.GO:0034637	GO:0034637	cellular carbohydrate biosynthetic process	5/161	79/16119	0.00116111	0.0476303	0.0433239	PGM1/UBC/EXT2/EXT1/RPS27A	5
salmon.GO:0006397	GO:0006397	mRNA processing	14/115	427/16119	2.11024e-06	0.00390816	0.00331419	SCAF1/SNRPD2/SUPT5H/HNRNPUL1/PAF1/SYMPK/SNRPA/SF3B4/U2AF2/TSEN34/ZFP36/PRPF31/POLR2I/SNRNP70	14
salmon.GO:0042059	GO:0042059	negative regulation of epidermal growth factor receptor signaling pathway	5/115	43/16119	1.31309e-05	0.0090936	0.00771152	EPN1/CBLC/AP2A1/NUP62/AP2S1	5
salmon.GO:1901185	GO:1901185	negative regulation of ERBB signaling pathway	5/115	44/16119	1.47305e-05	0.0090936	0.00771152	EPN1/CBLC/AP2A1/NUP62/AP2S1	5
salmon.GO:0008380	GO:0008380	RNA splicing	11/115	346/16119	3.69715e-05	0.0171178	0.0145162	PPP2R1A/SCAF1/SNRPD2/HNRNPUL1/SNRPA/SF3B4/U2AF2/TSEN34/PRPF31/POLR2I/SNRNP70	11
salmon.GO:0060370	GO:0060370	susceptibility to T cell mediated cytotoxicity	2/115	2/16119	5.04607e-05	0.0186907	0.01585	PVRL2/PVR	2
salmon.GO:0042271	GO:0042271	susceptibility to natural killer cell mediated cytotoxicity	2/115	3/16119	0.000150675	0.037565	0.0318557	PVRL2/PVR	2
salmon.GO:0042058	GO:0042058	regulation of epidermal growth factor receptor signaling pathway	5/115	71/16119	0.000151531	0.037565	0.0318557	EPN1/CBLC/AP2A1/NUP62/AP2S1	5
salmon.GO:1901184	GO:1901184	regulation of ERBB signaling pathway	5/115	74/16119	0.000184324	0.037565	0.0318557	EPN1/CBLC/AP2A1/NUP62/AP2S1	5
salmon.GO:0000377	GO:0000377	RNA splicing, via transesterification reactions with bulged adenosine as nucleophile	8/115	224/16119	0.000202835	0.037565	0.0318557	SNRPD2/HNRNPUL1/SNRPA/SF3B4/U2AF2/PRPF31/POLR2I/SNRNP70	8
salmon.GO:0000398	GO:0000398	mRNA splicing, via spliceosome	8/115	224/16119	0.000202835	0.037565	0.0318557	SNRPD2/HNRNPUL1/SNRPA/SF3B4/U2AF2/PRPF31/POLR2I/SNRNP70	8
salmon.GO:0000375	GO:0000375	RNA splicing, via transesterification reactions	8/115	229/16119	0.000235656	0.0396758	0.0336458	SNRPD2/HNRNPUL1/SNRPA/SF3B4/U2AF2/PRPF31/POLR2I/SNRNP70	8
tan.GO:0002495	GO:0002495	antigen processing and presentation of peptide antigen via MHC class II	17/143	96/16119	8.48276e-18	1.25776e-14	8.90343e-15	HLA-DPB1/HLA-DPA1/HLA-DMB/HLA-DOA/HLA-DQA1/FCER1G/HLA-DRA/CD74/TREM2/HLA-DQB1/HLA-DRB1/CTSL/HLA-DMA/HLA-DQB2/LGMN/CTSS/CTSD	17
tan.GO:0002504	GO:0002504	antigen processing and presentation of peptide or polysaccharide antigen via MHC class II	17/143	97/16119	1.02091e-17	1.25776e-14	8.90343e-15	HLA-DPB1/HLA-DPA1/HLA-DMB/HLA-DOA/HLA-DQA1/FCER1G/HLA-DRA/CD74/TREM2/HLA-DQB1/HLA-DRB1/CTSL/HLA-DMA/HLA-DQB2/LGMN/CTSS/CTSD	17
tan.GO:0048002	GO:0048002	antigen processing and presentation of peptide antigen	21/143	188/16119	1.8183e-17	1.49343e-14	1.05717e-14	HLA-DPB1/CYBB/HLA-DPA1/HLA-DMB/HLA-DOA/HLA-DQA1/FCER1G/HLA-DRA/CD74/TREM2/HLA-DQB1/B2M/HLA-DRB1/CTSL/HLA-DMA/HLA-DQB2/ERAP2/LGMN/CTSS/TAPBPL/CTSD	21
tan.GO:0019886	GO:0019886	antigen processing and presentation of exogenous peptide antigen via MHC class II	16/143	93/16119	1.33072e-16	8.19722e-14	5.80263e-14	HLA-DPB1/HLA-DPA1/HLA-DMB/HLA-DOA/HLA-DQA1/FCER1G/HLA-DRA/CD74/HLA-DQB1/HLA-DRB1/CTSL/HLA-DMA/HLA-DQB2/LGMN/CTSS/CTSD	16
tan.GO:0019882	GO:0019882	antigen processing and presentation	21/143	230/16119	1.14823e-15	5.65849e-13	4.00552e-13	HLA-DPB1/CYBB/HLA-DPA1/HLA-DMB/HLA-DOA/HLA-DQA1/FCER1G/HLA-DRA/CD74/TREM2/HLA-DQB1/B2M/HLA-DRB1/CTSL/HLA-DMA/HLA-DQB2/ERAP2/LGMN/CTSS/TAPBPL/CTSD	21
tan.GO:0002478	GO:0002478	antigen processing and presentation of exogenous peptide antigen	18/143	170/16119	1.07459e-14	4.41296e-12	3.12384e-12	HLA-DPB1/CYBB/HLA-DPA1/HLA-DMB/HLA-DOA/HLA-DQA1/FCER1G/HLA-DRA/CD74/HLA-DQB1/B2M/HLA-DRB1/CTSL/HLA-DMA/HLA-DQB2/LGMN/CTSS/CTSD	18
tan.GO:0019884	GO:0019884	antigen processing and presentation of exogenous antigen	18/143	172/16119	1.32161e-14	4.65208e-12	3.2931e-12	HLA-DPB1/CYBB/HLA-DPA1/HLA-DMB/HLA-DOA/HLA-DQA1/FCER1G/HLA-DRA/CD74/HLA-DQB1/B2M/HLA-DRB1/CTSL/HLA-DMA/HLA-DQB2/LGMN/CTSS/CTSD	18
tan.GO:0002250	GO:0002250	adaptive immune response	18/143	254/16119	1.08673e-11	3.34711e-09	2.36935e-09	TNFSF13B/C1QA/C1QC/C1QB/FCER1G/CD74/HLA-DQB1/B2M/CTSC/HLA-DRB1/CTSL/HLA-DMA/HLA-DQB2/CD40/CTSS/NDFIP1/BATF/CFI	18
tan.GO:0002253	GO:0002253	activation of immune response	22/143	424/16119	2.30096e-11	6.29952e-09	4.45929e-09	LY96/C1QA/CD4/C3AR1/C1QC/C1QB/HLA-DPB1/HLA-DPA1/FCGR2A/HLA-DQA1/FCER1G/HLA-DRA/VSIG4/HLA-DQB1/HLA-DRB1/CTSL/CD14/HCK/HLA-DQB2/LGMN/CTSS/CFI	22
tan.GO:0042110	GO:0042110	T cell activation	21/143	395/16119	4.35855e-11	1.07395e-08	7.60223e-09	AIF1/TNFSF13B/CCL5/MAFB/CD4/HLA-DPB1/HLA-DPA1/HLA-DMB/HLA-DOA/HLA-DQA1/HLA-DRA/CD74/VSIG4/HLA-DQB1/B2M/HLA-DRB1/HLA-DMA/HLA-DQB2/PREX1/NDFIP1/BATF	21
tan.GO:0016064	GO:0016064	immunoglobulin mediated immune response	13/143	122/16119	5.83746e-11	1.30759e-08	9.25615e-09	C1QA/C1QC/C1QB/FCER1G/CD74/HLA-DQB1/HLA-DRB1/HLA-DMA/HLA-DQB2/CD40/NDFIP1/BATF/CFI	13
tan.GO:0019724	GO:0019724	B cell mediated immunity	13/143	125/16119	7.95623e-11	1.60334e-08	1.13497e-08	C1QA/C1QC/C1QB/FCER1G/CD74/HLA-DQB1/HLA-DRB1/HLA-DMA/HLA-DQB2/CD40/NDFIP1/BATF/CFI	13
tan.GO:0002460	GO:0002460	adaptive immune response based on somatic recombination of immune receptors built from immunoglobulin superfamily domains	16/143	217/16119	9.05856e-11	1.60334e-08	1.13497e-08	TNFSF13B/C1QA/C1QC/C1QB/FCER1G/CD74/HLA-DQB1/B2M/CTSC/HLA-DRB1/HLA-DMA/HLA-DQB2/CD40/NDFIP1/BATF/CFI	16
tan.GO:0050865	GO:0050865	regulation of cell activation	21/143	411/16119	9.10987e-11	1.60334e-08	1.13497e-08	AIF1/TNFSF13B/CCL5/CD4/HLA-DPB1/HLA-DPA1/HLA-DMB/HLA-DOA/HLA-DQA1/FCER1G/HLA-DRA/CD74/VSIG4/HLA-DQB1/HLA-DRB1/HLA-DMA/HLA-DQB2/CD40/APOE/HMOX1/NDFIP1	21
tan.GO:0050863	GO:0050863	regulation of T cell activation	17/143	254/16119	1.03869e-10	1.70622e-08	1.2078e-08	AIF1/TNFSF13B/CCL5/CD4/HLA-DPB1/HLA-DPA1/HLA-DMB/HLA-DOA/HLA-DQA1/HLA-DRA/CD74/VSIG4/HLA-DQB1/HLA-DRB1/HLA-DMA/HLA-DQB2/NDFIP1	17
tan.GO:0002694	GO:0002694	regulation of leukocyte activation	20/143	381/16119	1.65327e-10	2.54604e-08	1.80229e-08	AIF1/TNFSF13B/CCL5/CD4/HLA-DPB1/HLA-DPA1/HLA-DMB/HLA-DOA/HLA-DQA1/FCER1G/HLA-DRA/CD74/VSIG4/HLA-DQB1/HLA-DRB1/HLA-DMA/HLA-DQB2/CD40/HMOX1/NDFIP1	20
tan.GO:0002449	GO:0002449	lymphocyte mediated immunity	15/143	208/16119	4.94224e-10	7.16334e-08	5.07077e-08	C1QA/C1QC/C1QB/FCER1G/CD74/HLA-DQB1/B2M/CTSC/HLA-DRB1/HLA-DMA/HLA-DQB2/CD40/NDFIP1/BATF/CFI	15
tan.GO:0002696	GO:0002696	positive regulation of leukocyte activation	16/143	255/16119	9.818e-10	1.24066e-07	8.78233e-08	AIF1/TNFSF13B/CCL5/CD4/HLA-DPB1/HLA-DPA1/HLA-DMB/HLA-DQA1/FCER1G/HLA-DRA/CD74/HLA-DQB1/HLA-DRB1/HLA-DMA/HLA-DQB2/CD40	16
tan.GO:0050870	GO:0050870	positive regulation of T cell activation	14/143	185/16119	1.02693e-09	1.24066e-07	8.78233e-08	AIF1/TNFSF13B/CCL5/CD4/HLA-DPB1/HLA-DPA1/HLA-DMB/HLA-DQA1/HLA-DRA/CD74/HLA-DQB1/HLA-DRB1/HLA-DMA/HLA-DQB2	14
tan.GO:0071346	GO:0071346	cellular response to interferon-gamma	11/143	98/16119	1.05353e-09	1.24066e-07	8.78233e-08	AIF1/CCL5/HLA-DPB1/HLA-DPA1/HLA-DQA1/HLA-DRA/HLA-DQB1/B2M/HLA-DRB1/HCK/HLA-DQB2	11
tan.GO:0051249	GO:0051249	regulation of lymphocyte activation	18/143	336/16119	1.05738e-09	1.24066e-07	8.78233e-08	AIF1/TNFSF13B/CCL5/CD4/HLA-DPB1/HLA-DPA1/HLA-DMB/HLA-DOA/HLA-DQA1/HLA-DRA/CD74/VSIG4/HLA-DQB1/HLA-DRB1/HLA-DMA/HLA-DQB2/CD40/NDFIP1	18
tan.GO:0002443	GO:0002443	leukocyte mediated immunity	16/143	260/16119	1.30243e-09	1.45872e-07	1.0326e-07	C1QA/C1QC/C1QB/FCER1G/CD74/HLA-DQB1/B2M/CTSC/HLA-DRB1/HLA-DMA/HLA-DQB2/CD40/HMOX1/NDFIP1/BATF/CFI	16
tan.GO:0050867	GO:0050867	positive regulation of cell activation	16/143	264/16119	1.62543e-09	1.74133e-07	1.23265e-07	AIF1/TNFSF13B/CCL5/CD4/HLA-DPB1/HLA-DPA1/HLA-DMB/HLA-DQA1/FCER1G/HLA-DRA/CD74/HLA-DQB1/HLA-DRB1/HLA-DMA/HLA-DQB2/CD40	16
tan.GO:0051251	GO:0051251	positive regulation of lymphocyte activation	15/143	236/16119	2.83412e-09	2.9097e-07	2.05971e-07	AIF1/TNFSF13B/CCL5/CD4/HLA-DPB1/HLA-DPA1/HLA-DMB/HLA-DQA1/HLA-DRA/CD74/HLA-DQB1/HLA-DRB1/HLA-DMA/HLA-DQB2/CD40	15
tan.GO:0002521	GO:0002521	leukocyte differentiation	19/143	414/16119	4.56653e-09	4.50077e-07	3.18599e-07	TYROBP/MAFB/CD4/C1QC/CSF1R/SPI1/HLA-DOA/CD74/TREM2/B2M/HLA-DMA/HLA-DQB2/PREX1/SNX10/CSF1/NDFIP1/BATF/FAM213A/MMP9	19
tan.GO:0034341	GO:0034341	response to interferon-gamma	11/143	118/16119	7.73727e-09	7.33255e-07	5.19055e-07	AIF1/CCL5/HLA-DPB1/HLA-DPA1/HLA-DQA1/HLA-DRA/HLA-DQB1/B2M/HLA-DRB1/HCK/HLA-DQB2	11
tan.GO:0002440	GO:0002440	production of molecular mediator of immune response	11/143	122/16119	1.10102e-08	1.00478e-06	7.11264e-07	TNFSF13B/FCER1G/CD74/HLA-DQB1/HLA-DRB1/HLA-DQB2/CD40/HMOX1/NDFIP1/BATF/GPRC5B	11
tan.GO:0031295	GO:0031295	T cell costimulation	9/143	73/16119	1.58421e-08	1.39411e-06	9.86858e-07	TNFSF13B/CD4/HLA-DPB1/HLA-DPA1/HLA-DQA1/HLA-DRA/HLA-DQB1/HLA-DRB1/HLA-DQB2	9
tan.GO:0031294	GO:0031294	lymphocyte costimulation	9/143	74/16119	1.79009e-08	1.52096e-06	1.07665e-06	TNFSF13B/CD4/HLA-DPB1/HLA-DPA1/HLA-DQA1/HLA-DRA/HLA-DQB1/HLA-DRB1/HLA-DQB2	9
tan.GO:0060333	GO:0060333	interferon-gamma-mediated signaling pathway	9/143	75/16119	2.01898e-08	1.65826e-06	1.17384e-06	HLA-DPB1/HLA-DPA1/HLA-DQA1/HLA-DRA/HLA-DQB1/B2M/HLA-DRB1/HCK/HLA-DQB2	9
tan.GO:0002399	GO:0002399	MHC class II protein complex assembly	4/143	5/16119	2.94947e-08	2.27109e-06	1.60765e-06	HLA-DMB/HLA-DRA/HLA-DRB1/HLA-DMA	4
tan.GO:0002503	GO:0002503	peptide antigen assembly with MHC class II protein complex	4/143	5/16119	2.94947e-08	2.27109e-06	1.60765e-06	HLA-DMB/HLA-DRA/HLA-DRB1/HLA-DMA	4
tan.GO:0002757	GO:0002757	immune response-activating signal transduction	17/143	374/16119	3.6326e-08	2.71234e-06	1.92001e-06	LY96/CD4/C3AR1/HLA-DPB1/HLA-DPA1/FCGR2A/HLA-DQA1/FCER1G/HLA-DRA/HLA-DQB1/HLA-DRB1/CTSL/CD14/HCK/HLA-DQB2/LGMN/CTSS	17
tan.GO:0032944	GO:0032944	regulation of mononuclear cell proliferation	12/143	172/16119	4.19925e-08	3.04322e-06	2.15423e-06	AIF1/TNFSF13B/CCL5/HLA-DPB1/HLA-DPA1/HLA-DMB/CD74/VSIG4/HLA-DRB1/CD40/CSF1/NDFIP1	12
tan.GO:0070663	GO:0070663	regulation of leukocyte proliferation	12/143	177/16119	5.76832e-08	4.0609e-06	2.87462e-06	AIF1/TNFSF13B/CCL5/HLA-DPB1/HLA-DPA1/HLA-DMB/CD74/VSIG4/HLA-DRB1/CD40/CSF1/NDFIP1	12
tan.GO:0002396	GO:0002396	MHC protein complex assembly	4/143	6/16119	8.78736e-08	5.85191e-06	4.14243e-06	HLA-DMB/HLA-DRA/HLA-DRB1/HLA-DMA	4
tan.GO:0002501	GO:0002501	peptide antigen assembly with MHC protein complex	4/143	6/16119	8.78736e-08	5.85191e-06	4.14243e-06	HLA-DMB/HLA-DRA/HLA-DRB1/HLA-DMA	4
tan.GO:0050727	GO:0050727	regulation of inflammatory response	13/143	243/16119	2.54602e-07	1.65089e-05	1.16863e-05	CCL5/PLA2G7/FCER1G/HCK/TGM2/APOE/CTSS/ACP5/GPX1/TNFRSF1B/NDFIP1/CFI/GPRC5B	13
tan.GO:0002764	GO:0002764	immune response-regulating signaling pathway	18/143	481/16119	2.62376e-07	1.65768e-05	1.17343e-05	LY96/CD4/C3AR1/HLA-DPB1/HLA-DPA1/FCGR2A/HLA-DQA1/FCER1G/HLA-DRA/HLA-DQB1/HLA-DRB1/CTSL/CD14/HCK/HLA-DQB2/CD40/LGMN/CTSS	18
tan.GO:0001817	GO:0001817	regulation of cytokine production	18/143	483/16119	2.7889e-07	1.71797e-05	1.21611e-05	SRGN/CD4/C3AR1/HLA-DPB1/HLA-DPA1/CSF1R/FCER1G/CD74/VSIG4/HLA-DRB1/CD14/CD40/LITAF/ACP5/HMOX1/ATP6AP2/NDFIP1/GPRC5B	18
tan.GO:0002577	GO:0002577	regulation of antigen processing and presentation	5/143	17/16119	2.90952e-07	1.74855e-05	1.23776e-05	HLA-DOA/CD74/TREM2/HLA-DQB2/TAPBPL	5
tan.GO:0050670	GO:0050670	regulation of lymphocyte proliferation	11/143	171/16119	3.57574e-07	2.07017e-05	1.46542e-05	AIF1/TNFSF13B/CCL5/HLA-DPB1/HLA-DPA1/HLA-DMB/CD74/VSIG4/HLA-DRB1/CD40/NDFIP1	11
tan.GO:0002274	GO:0002274	myeloid leukocyte activation	10/143	136/16119	3.61271e-07	2.07017e-05	1.46542e-05	AIF1/TYROBP/CCL5/SPI1/FCER1G/CD74/PREX1/CSF1/HMOX1/BATF	10
tan.GO:1903034	GO:1903034	regulation of response to wounding	15/143	344/16119	4.13756e-07	2.31703e-05	1.64018e-05	CCL5/PLA2G7/FCER1G/HCK/TGM2/APOE/CTSS/ACP5/USF1/GPX1/TNFRSF1B/NDFIP1/CFI/PLAUR/GPRC5B	15
tan.GO:0032946	GO:0032946	positive regulation of mononuclear cell proliferation	9/143	114/16119	7.77759e-07	4.20099e-05	2.97379e-05	AIF1/TNFSF13B/CCL5/HLA-DPB1/HLA-DPA1/HLA-DMB/CD74/CD40/CSF1	9
tan.GO:0032103	GO:0032103	positive regulation of response to external stimulus	11/143	185/16119	7.84276e-07	4.20099e-05	2.97379e-05	AIF1/LY96/CCL5/C3AR1/PLA2G7/FCER1G/CD74/CCL4/TGM2/CTSS/GPRC5B	11
tan.GO:0070665	GO:0070665	positive regulation of leukocyte proliferation	9/143	117/16119	9.68969e-07	5.03054e-05	3.56101e-05	AIF1/TNFSF13B/CCL5/HLA-DPB1/HLA-DPA1/HLA-DMB/CD74/CD40/CSF1	9
tan.GO:0002429	GO:0002429	immune response-activating cell surface receptor signaling pathway	12/143	230/16119	9.79975e-07	5.03054e-05	3.56101e-05	CD4/C3AR1/HLA-DPB1/HLA-DPA1/FCGR2A/HLA-DQA1/FCER1G/HLA-DRA/HLA-DQB1/HLA-DRB1/HCK/HLA-DQB2	12
tan.GO:0032943	GO:0032943	mononuclear cell proliferation	12/143	232/16119	1.07373e-06	5.39931e-05	3.82205e-05	AIF1/TNFSF13B/CCL5/HLA-DPB1/HLA-DPA1/HLA-DMB/CD74/VSIG4/HLA-DRB1/CD40/CSF1/NDFIP1	12
tan.GO:0043123	GO:0043123	positive regulation of I-kappaB kinase/NF-kappaB signaling	10/143	154/16119	1.13873e-06	5.61166e-05	3.97237e-05	APOL3/TGM2/CD40/LITAF/RHOA/PLK2/HMOX1/LGALS9/NDFIP1/GPRC5B	10
tan.GO:0007249	GO:0007249	I-kappaB kinase/NF-kappaB signaling	12/143	235/16119	1.22928e-06	5.93911e-05	4.20416e-05	APOL3/LY96/CD14/TGM2/CD40/LITAF/RHOA/PLK2/HMOX1/LGALS9/NDFIP1/GPRC5B	12
tan.GO:0070661	GO:0070661	leukocyte proliferation	12/143	242/16119	1.67234e-06	7.92431e-05	5.60944e-05	AIF1/TNFSF13B/CCL5/HLA-DPB1/HLA-DPA1/HLA-DMB/CD74/VSIG4/HLA-DRB1/CD40/CSF1/NDFIP1	12
tan.GO:0042129	GO:0042129	regulation of T cell proliferation	9/143	127/16119	1.92917e-06	8.8151e-05	6.24001e-05	AIF1/TNFSF13B/CCL5/HLA-DPB1/HLA-DPA1/HLA-DMB/VSIG4/HLA-DRB1/NDFIP1	9
tan.GO:0019221	GO:0019221	cytokine-mediated signaling pathway	15/143	389/16119	1.93188e-06	8.8151e-05	6.24001e-05	CCL5/HLA-DPB1/HLA-DPA1/CSF1R/HLA-DQA1/HLA-DRA/CD74/TREM2/HLA-DQB1/B2M/HLA-DRB1/HCK/HLA-DQB2/IL2RG/TNFRSF1B	15
tan.GO:0050900	GO:0050900	leukocyte migration	13/143	300/16119	2.72908e-06	0.000122263	8.65471e-05	AIF1/CCL5/MSN/C3AR1/PLA2G7/FCER1G/CD74/CCL4/HCK/PREX1/HMOX1/MMP9/SLC7A7	13
tan.GO:0002573	GO:0002573	myeloid leukocyte differentiation	10/143	170/16119	2.79181e-06	0.00012284	8.69554e-05	TYROBP/C1QC/CSF1R/SPI1/SNX10/CSF1/NDFIP1/BATF/FAM213A/MMP9	10
tan.GO:0009617	GO:0009617	response to bacterium	15/143	408/16119	3.46715e-06	0.000149878	0.000106095	LY96/CCL5/CD4/FCER1G/SLAMF8/B2M/HLA-DRB1/CD14/HCK/STAB1/CD40/LITAF/ACP5/GPX1/TNFRSF1B	15
tan.GO:0002381	GO:0002381	immunoglobulin production involved in immunoglobulin mediated immune response	6/143	48/16119	3.96278e-06	0.00016835	0.000119171	HLA-DQB1/HLA-DRB1/HLA-DQB2/CD40/NDFIP1/BATF	6
tan.GO:0002685	GO:0002685	regulation of leukocyte migration	8/143	107/16119	4.90407e-06	0.000204807	0.000144978	AIF1/CCL5/MSN/C3AR1/PLA2G7/CD74/CCL4/HMOX1	8
tan.GO:0002377	GO:0002377	immunoglobulin production	7/143	77/16119	5.34594e-06	0.00021954	0.000155407	TNFSF13B/HLA-DQB1/HLA-DRB1/HLA-DQB2/CD40/NDFIP1/BATF	7
tan.GO:0050852	GO:0050852	T cell receptor signaling pathway	8/143	111/16119	6.44815e-06	0.000258646	0.00018309	CD4/HLA-DPB1/HLA-DPA1/HLA-DQA1/HLA-DRA/HLA-DQB1/HLA-DRB1/HLA-DQB2	8
tan.GO:0046651	GO:0046651	lymphocyte proliferation	11/143	230/16119	6.50813e-06	0.000258646	0.00018309	AIF1/TNFSF13B/CCL5/HLA-DPB1/HLA-DPA1/HLA-DMB/CD74/VSIG4/HLA-DRB1/CD40/NDFIP1	11
tan.GO:0050671	GO:0050671	positive regulation of lymphocyte proliferation	8/143	113/16119	7.36285e-06	0.000287969	0.000203847	AIF1/TNFSF13B/CCL5/HLA-DPB1/HLA-DPA1/HLA-DMB/CD74/CD40	8
tan.GO:0002690	GO:0002690	positive regulation of leukocyte chemotaxis	6/143	54/16119	7.98376e-06	0.000307375	0.000217584	AIF1/CCL5/C3AR1/PLA2G7/CD74/CCL4	6
tan.GO:0042098	GO:0042098	T cell proliferation	9/143	155/16119	9.91422e-06	0.000375825	0.000266038	AIF1/TNFSF13B/CCL5/HLA-DPB1/HLA-DPA1/HLA-DMB/VSIG4/HLA-DRB1/NDFIP1	9
tan.GO:0030225	GO:0030225	macrophage differentiation	5/143	34/16119	1.15878e-05	0.000432612	0.000306236	C1QC/CSF1R/SPI1/CSF1/MMP9	5
tan.GO:0002768	GO:0002768	immune response-regulating cell surface receptor signaling pathway	13/143	350/16119	1.44182e-05	0.000530246	0.000375349	CD4/C3AR1/HLA-DPB1/HLA-DPA1/FCGR2A/HLA-DQA1/FCER1G/HLA-DRA/HLA-DQB1/HLA-DRB1/HCK/HLA-DQB2/CD40	13
tan.GO:0030099	GO:0030099	myeloid cell differentiation	12/143	300/16119	1.50139e-05	0.000544033	0.000385109	TYROBP/MAFB/C1QC/CSF1R/SPI1/DNASE2/SNX10/CSF1/NDFIP1/BATF/FAM213A/MMP9	12
tan.GO:0061082	GO:0061082	myeloid leukocyte cytokine production	4/143	18/16119	1.64994e-05	0.000589195	0.000417078	FCER1G/CD74/HMOX1/GPRC5B	4
tan.GO:0006687	GO:0006687	glycosphingolipid metabolic process	6/143	62/16119	1.79288e-05	0.000631093	0.000446737	GM2A/ASAH1/HEXB/PSAP/NAGA/ARSA	6
tan.GO:0016042	GO:0016042	lipid catabolic process	11/143	259/16119	1.98537e-05	0.000689008	0.000487734	GM2A/PLA2G7/LIPA/YWHAH/APOE/PLD3/APOC1/HEXB/PPT1/NAGA/PHYH	11
tan.GO:0043122	GO:0043122	regulation of I-kappaB kinase/NF-kappaB signaling	10/143	213/16119	2.03645e-05	0.000696918	0.000493332	APOL3/TGM2/CD40/LITAF/RHOA/PLK2/HMOX1/LGALS9/NDFIP1/GPRC5B	10
tan.GO:0002697	GO:0002697	regulation of immune effector process	11/143	261/16119	2.13194e-05	0.000719602	0.00050939	CD4/HLA-DMB/FCER1G/CD74/B2M/HCK/CD40/HMOX1/NDFIP1/CFI/GPRC5B	11
tan.GO:0002583	GO:0002583	regulation of antigen processing and presentation of peptide antigen	3/143	7/16119	2.33147e-05	0.000776316	0.000549537	HLA-DOA/TREM2/TAPBPL	3
tan.GO:0002688	GO:0002688	regulation of leukocyte chemotaxis	6/143	66/16119	2.57391e-05	0.000845616	0.000598592	AIF1/CCL5/C3AR1/PLA2G7/CD74/CCL4	6
tan.GO:0002455	GO:0002455	humoral immune response mediated by circulating immunoglobulin	6/143	67/16119	2.80661e-05	0.000909933	0.000644121	C1QA/C1QC/C1QB/HLA-DQB1/HLA-DRB1/CFI	6
tan.GO:0030149	GO:0030149	sphingolipid catabolic process	4/143	21/16119	3.16098e-05	0.00101151	0.000716027	GM2A/HEXB/PPT1/NAGA	4
tan.GO:0006664	GO:0006664	glycolipid metabolic process	7/143	101/16119	3.20361e-05	0.00101201	0.000716381	GM2A/ASAH1/HEXB/PSAP/NAGA/PLAUR/ARSA	7
tan.GO:0030098	GO:0030098	lymphocyte differentiation	11/143	276/16119	3.56269e-05	0.0011112	0.000786592	MAFB/CD4/SPI1/HLA-DOA/CD74/B2M/HLA-DMA/HLA-DQB2/PREX1/NDFIP1/BATF	11
tan.GO:0030335	GO:0030335	positive regulation of cell migration	11/143	277/16119	3.68219e-05	0.00112507	0.00079641	AIF1/CCL5/C3AR1/CSF1R/PLA2G7/CD74/CCL4/RHOA/CSF1/ONECUT2/MMP9	11
tan.GO:0030595	GO:0030595	leukocyte chemotaxis	8/143	141/16119	3.69847e-05	0.00112507	0.00079641	AIF1/CCL5/C3AR1/PLA2G7/FCER1G/CD74/CCL4/PREX1	8
tan.GO:0050851	GO:0050851	antigen receptor-mediated signaling pathway	8/143	143/16119	4.09031e-05	0.00122909	0.000870044	CD4/HLA-DPB1/HLA-DPA1/HLA-DQA1/HLA-DRA/HLA-DQB1/HLA-DRB1/HLA-DQB2	8
tan.GO:0031349	GO:0031349	positive regulation of defense response	11/143	281/16119	4.19544e-05	0.00124549	0.000881653	LY96/CCL5/PLA2G7/FCER1G/CTSL/CD14/HCK/TGM2/LGMN/CTSS/GPRC5B	11
tan.GO:0042119	GO:0042119	neutrophil activation	4/143	23/16119	4.61272e-05	0.00132362	0.00093696	TYROBP/CCL5/FCER1G/PREX1	4
tan.GO:0046466	GO:0046466	membrane lipid catabolic process	4/143	23/16119	4.61272e-05	0.00132362	0.00093696	GM2A/HEXB/PPT1/NAGA	4
tan.GO:2000147	GO:2000147	positive regulation of cell motility	11/143	284/16119	4.61977e-05	0.00132362	0.00093696	AIF1/CCL5/C3AR1/CSF1R/PLA2G7/CD74/CCL4/RHOA/CSF1/ONECUT2/MMP9	11
tan.GO:0051272	GO:0051272	positive regulation of cellular component movement	11/143	291/16119	5.7561e-05	0.00159448	0.00112869	AIF1/CCL5/C3AR1/CSF1R/PLA2G7/CD74/CCL4/RHOA/CSF1/ONECUT2/MMP9	11
tan.GO:0002687	GO:0002687	positive regulation of leukocyte migration	6/143	76/16119	5.75927e-05	0.00159448	0.00112869	AIF1/CCL5/C3AR1/PLA2G7/CD74/CCL4	6
tan.GO:0002700	GO:0002700	regulation of production of molecular mediator of immune response	6/143	76/16119	5.75927e-05	0.00159448	0.00112869	FCER1G/CD74/CD40/HMOX1/NDFIP1/GPRC5B	6
tan.GO:0060326	GO:0060326	cell chemotaxis	9/143	199/16119	7.13055e-05	0.00193145	0.00136723	AIF1/CCL5/C3AR1/PLA2G7/FCER1G/CD74/CCL4/PREX1/CCL18	9
tan.GO:0071222	GO:0071222	cellular response to lipopolysaccharide	7/143	115/16119	7.36187e-05	0.00193145	0.00136723	LY96/CCL5/CD14/HCK/CD40/LITAF/TNFRSF1B	7
tan.GO:0097529	GO:0097529	myeloid leukocyte migration	7/143	115/16119	7.36187e-05	0.00193145	0.00136723	AIF1/CCL5/C3AR1/PLA2G7/FCER1G/CD74/PREX1	7
tan.GO:0040017	GO:0040017	positive regulation of locomotion	11/143	300/16119	7.5638e-05	0.00193145	0.00136723	AIF1/CCL5/C3AR1/CSF1R/PLA2G7/CD74/CCL4/RHOA/CSF1/ONECUT2/MMP9	11
tan.GO:0036230	GO:0036230	granulocyte activation	4/143	26/16119	7.62837e-05	0.00193145	0.00136723	TYROBP/CCL5/FCER1G/PREX1	4
tan.GO:0002505	GO:0002505	antigen processing and presentation of polysaccharide antigen via MHC class II	2/143	2/16119	7.81583e-05	0.00193145	0.00136723	HLA-DRA/HLA-DRB1	2
tan.GO:0002506	GO:0002506	polysaccharide assembly with MHC class II protein complex	2/143	2/16119	7.81583e-05	0.00193145	0.00136723	HLA-DRA/HLA-DRB1	2
tan.GO:0065006	GO:0065006	protein-carbohydrate complex assembly	2/143	2/16119	7.81583e-05	0.00193145	0.00136723	HLA-DRA/HLA-DRB1	2
tan.GO:0071823	GO:0071823	protein-carbohydrate complex subunit organization	2/143	2/16119	7.81583e-05	0.00193145	0.00136723	HLA-DRA/HLA-DRB1	2
tan.GO:0061081	GO:0061081	positive regulation of myeloid leukocyte cytokine production involved in immune response	3/143	10/16119	7.83868e-05	0.00193145	0.00136723	FCER1G/CD74/GPRC5B	3
tan.GO:0090026	GO:0090026	positive regulation of monocyte chemotaxis	3/143	10/16119	7.83868e-05	0.00193145	0.00136723	AIF1/CCL5/PLA2G7	3
tan.GO:0002699	GO:0002699	positive regulation of immune effector process	7/143	117/16119	8.21155e-05	0.00200329	0.00141809	HLA-DMB/FCER1G/CD74/B2M/CD40/HMOX1/GPRC5B	7
tan.GO:0042102	GO:0042102	positive regulation of T cell proliferation	6/143	82/16119	8.83158e-05	0.00213343	0.00151021	AIF1/TNFSF13B/CCL5/HLA-DPB1/HLA-DPA1/HLA-DMB	6
tan.GO:0042157	GO:0042157	lipoprotein metabolic process	7/143	119/16119	9.13959e-05	0.0021864	0.0015477	APOL3/CD4/PLA2G7/APOE/APOC1/PPT1/PLAUR	7
tan.GO:0048872	GO:0048872	homeostasis of number of cells	9/143	206/16119	9.29586e-05	0.0022024	0.00155903	TNFSF13B/MAFB/SPI1/FCER1G/LIPA/CD74/DNASE2/CSF1/HMOX1	9
tan.GO:0071219	GO:0071219	cellular response to molecule of bacterial origin	7/143	121/16119	0.000101514	0.00238219	0.0016863	LY96/CCL5/CD14/HCK/CD40/LITAF/TNFRSF1B	7
tan.GO:0030003	GO:0030003	cellular cation homeostasis	13/143	430/16119	0.000119439	0.0027764	0.00196535	CCL5/C3AR1/SLAMF8/TGM2/CD40/APOE/ATP6V1B2/HEXB/HMOX1/FTL/PPT1/NDFIP1/ATP6V0D1	13
tan.GO:0050921	GO:0050921	positive regulation of chemotaxis	6/143	87/16119	0.000122828	0.00282848	0.00200222	AIF1/CCL5/C3AR1/PLA2G7/CD74/CCL4	6
tan.GO:0006643	GO:0006643	membrane lipid metabolic process	8/143	169/16119	0.000132395	0.00302057	0.00213819	GM2A/ASAH1/HEXB/PSAP/PPT1/NAGA/PLAUR/ARSA	8
tan.GO:0006665	GO:0006665	sphingolipid metabolic process	7/143	127/16119	0.000137465	0.00308911	0.00218671	GM2A/ASAH1/HEXB/PSAP/PPT1/NAGA/ARSA	7
tan.GO:0006959	GO:0006959	humoral immune response	8/143	170/16119	0.000137907	0.00308911	0.00218671	C1QA/C1QC/C1QB/TREM2/VSIG4/HLA-DQB1/HLA-DRB1/CFI	8
tan.GO:0002579	GO:0002579	positive regulation of antigen processing and presentation	3/143	12/16119	0.000141848	0.00312066	0.00220904	CD74/TREM2/HLA-DQB2	3
tan.GO:0046479	GO:0046479	glycosphingolipid catabolic process	3/143	12/16119	0.000141848	0.00312066	0.00220904	GM2A/HEXB/NAGA	3
tan.GO:0006873	GO:0006873	cellular ion homeostasis	13/143	443/16119	0.000160336	0.00349617	0.00247486	CCL5/C3AR1/SLAMF8/TGM2/CD40/APOE/ATP6V1B2/HEXB/HMOX1/FTL/PPT1/NDFIP1/ATP6V0D1	13
tan.GO:2000401	GO:2000401	regulation of lymphocyte migration	4/143	32/16119	0.000176066	0.0038055	0.00269383	AIF1/CCL5/MSN/CCL4	4
tan.GO:0019377	GO:0019377	glycolipid catabolic process	3/143	13/16119	0.000183205	0.00389153	0.00275473	GM2A/HEXB/NAGA	3
tan.GO:0046514	GO:0046514	ceramide catabolic process	3/143	13/16119	0.000183205	0.00389153	0.00275473	GM2A/HEXB/NAGA	3
tan.GO:0001819	GO:0001819	positive regulation of cytokine production	10/143	278/16119	0.000188679	0.00397354	0.00281278	C3AR1/HLA-DPB1/HLA-DPA1/CSF1R/FCER1G/CD74/CD14/CD40/ATP6AP2/GPRC5B	10
tan.GO:0097285	GO:0097285	cell-type specific apoptotic process	12/143	393/16119	0.00020056	0.00418797	0.00296457	CCL5/FCER1G/CD74/CTSL/CD40/APOE/LGMN/RHOA/GPX1/AATK/HMOX1/PPT1	12
tan.GO:0071216	GO:0071216	cellular response to biotic stimulus	7/143	137/16119	0.000219856	0.00455231	0.00322248	LY96/CCL5/CD14/HCK/CD40/LITAF/TNFRSF1B	7
tan.GO:0050731	GO:0050731	positive regulation of peptidyl-tyrosine phosphorylation	7/143	138/16119	0.00022991	0.004708	0.00333269	CCL5/CD4/CSF1R/CD74/TREM2/CD40/GPRC5B	7
tan.GO:0090025	GO:0090025	regulation of monocyte chemotaxis	3/143	14/16119	0.000231657	0.004708	0.00333269	AIF1/CCL5/PLA2G7	3
tan.GO:0002584	GO:0002584	negative regulation of antigen processing and presentation of peptide antigen	2/143	3/16119	0.000233107	0.004708	0.00333269	HLA-DOA/TAPBPL	2
tan.GO:0007040	GO:0007040	lysosome organization	4/143	35/16119	0.00025113	0.00503076	0.00356116	TPP1/HEXB/PPT1/ACP2	4
tan.GO:0030217	GO:0030217	T cell differentiation	8/143	186/16119	0.000255226	0.00507159	0.00359006	MAFB/CD4/HLA-DOA/CD74/B2M/HLA-DMA/PREX1/BATF	8
tan.GO:0006879	GO:0006879	cellular iron ion homeostasis	5/143	65/16119	0.000275923	0.0054039	0.0038253	ATP6V1B2/HMOX1/FTL/NDFIP1/ATP6V0D1	5
tan.GO:0002474	GO:0002474	antigen processing and presentation of peptide antigen via MHC class I	6/143	101/16119	0.000278529	0.0054039	0.0038253	CYBB/FCER1G/B2M/ERAP2/CTSS/TAPBPL	6
tan.GO:0048520	GO:0048520	positive regulation of behavior	6/143	101/16119	0.000278529	0.0054039	0.0038253	AIF1/CCL5/C3AR1/PLA2G7/CD74/CCL4	6
tan.GO:0002822	GO:0002822	regulation of adaptive immune response based on somatic recombination of immune receptors built from immunoglobulin superfamily domains	6/143	102/16119	0.000293803	0.00565571	0.00400355	TNFSF13B/FCER1G/B2M/HLA-DQB2/CD40/NDFIP1	6
tan.GO:0002237	GO:0002237	response to molecule of bacterial origin	9/143	244/16119	0.000330352	0.00630998	0.00446669	LY96/CCL5/B2M/CD14/HCK/CD40/LITAF/ACP5/TNFRSF1B	9
tan.GO:0006956	GO:0006956	complement activation	5/143	68/16119	0.00034089	0.00646118	0.00457372	C1QA/C1QC/C1QB/VSIG4/CFI	5
tan.GO:0045058	GO:0045058	T cell selection	4/143	38/16119	0.000346811	0.00652322	0.00461764	CD4/CD74/HLA-DMA/BATF	4
tan.GO:0002819	GO:0002819	regulation of adaptive immune response	6/143	111/16119	0.0004629	0.00849876	0.00601608	TNFSF13B/FCER1G/B2M/HLA-DQB2/CD40/NDFIP1	6
tan.GO:0002586	GO:0002586	regulation of antigen processing and presentation of peptide antigen via MHC class II	2/143	4/16119	0.000463497	0.00849876	0.00601608	HLA-DOA/TREM2	2
tan.GO:0032763	GO:0032763	regulation of mast cell cytokine production	2/143	4/16119	0.000463497	0.00849876	0.00601608	FCER1G/HMOX1	2
tan.GO:0045637	GO:0045637	regulation of myeloid cell differentiation	7/143	155/16119	0.000465638	0.00849876	0.00601608	TYROBP/MAFB/C1QC/SPI1/CSF1/NDFIP1/FAM213A	7
tan.GO:0071621	GO:0071621	granulocyte chemotaxis	5/143	73/16119	0.000474097	0.00858953	0.00608034	CCL5/C3AR1/FCER1G/CD74/PREX1	5
tan.GO:0051241	GO:0051241	negative regulation of multicellular organismal process	11/143	374/16119	0.000508605	0.00914746	0.00647528	SRGN/VSIG4/HLA-DRB1/APOE/LGMN/ACP5/USF1/APOC1/HMOX1/NDFIP1/PLAUR	11
tan.GO:0007033	GO:0007033	vacuole organization	5/143	75/16119	0.000537109	0.00959013	0.00678864	TPP1/HEXB/PPT1/ACP2/CTSD	5
tan.GO:1902105	GO:1902105	regulation of leukocyte differentiation	8/143	209/16119	0.000556459	0.00986413	0.0069826	TYROBP/C1QC/HLA-DOA/CD74/HLA-DMA/CSF1/NDFIP1/FAM213A	8
tan.GO:0030316	GO:0030316	osteoclast differentiation	5/143	76/16119	0.000570878	0.0100475	0.00711237	TYROBP/CSF1R/SNX10/CSF1/FAM213A	5
tan.GO:0050920	GO:0050920	regulation of chemotaxis	6/143	117/16119	0.000612275	0.0106996	0.00757402	AIF1/CCL5/C3AR1/PLA2G7/CD74/CCL4	6
tan.GO:0050729	GO:0050729	positive regulation of inflammatory response	5/143	78/16119	0.00064317	0.0111604	0.00790017	PLA2G7/FCER1G/TGM2/CTSS/GPRC5B	5
tan.GO:0048661	GO:0048661	positive regulation of smooth muscle cell proliferation	4/143	45/16119	0.00066721	0.0114965	0.00813814	AIF1/CCL5/TGM2/HMOX1	4
tan.GO:0097530	GO:0097530	granulocyte migration	5/143	79/16119	0.000681787	0.0116661	0.00825819	CCL5/C3AR1/FCER1G/CD74/PREX1	5
tan.GO:0090382	GO:0090382	phagosome maturation	4/143	46/16119	0.000725763	0.012333	0.00873022	CYBB/SLAMF8/ATP6V1B2/ATP6V0D1	4
tan.GO:0002578	GO:0002578	negative regulation of antigen processing and presentation	2/143	5/16119	0.000767997	0.0126156	0.00893032	HLA-DOA/TAPBPL	2
tan.GO:0002580	GO:0002580	regulation of antigen processing and presentation of peptide or polysaccharide antigen via MHC class II	2/143	5/16119	0.000767997	0.0126156	0.00893032	HLA-DOA/TREM2	2
tan.GO:0006689	GO:0006689	ganglioside catabolic process	2/143	5/16119	0.000767997	0.0126156	0.00893032	GM2A/HEXB	2
tan.GO:0032762	GO:0032762	mast cell cytokine production	2/143	5/16119	0.000767997	0.0126156	0.00893032	FCER1G/HMOX1	2
tan.GO:2000503	GO:2000503	positive regulation of natural killer cell chemotaxis	2/143	5/16119	0.000767997	0.0126156	0.00893032	CCL5/CCL4	2
tan.GO:0002718	GO:0002718	regulation of cytokine production involved in immune response	4/143	48/16119	0.000853615	0.0139292	0.00986016	FCER1G/CD74/HMOX1/GPRC5B	4
tan.GO:0002683	GO:0002683	negative regulation of immune system process	8/143	225/16119	0.000900723	0.0144477	0.0102272	HLA-DOA/CD74/VSIG4/HLA-DRB1/GPX1/HMOX1/NDFIP1/TAPBPL	8
tan.GO:0055065	GO:0055065	metal ion homeostasis	12/143	465/16119	0.000901293	0.0144477	0.0102272	CCL5/C3AR1/TGM2/CD40/APOE/ATP6V1B2/HEXB/HMOX1/FTL/NDFIP1/SCNN1A/ATP6V0D1	12
tan.GO:0006875	GO:0006875	cellular metal ion homeostasis	11/143	401/16119	0.000902982	0.0144477	0.0102272	CCL5/C3AR1/TGM2/CD40/APOE/ATP6V1B2/HEXB/HMOX1/FTL/NDFIP1/ATP6V0D1	11
tan.GO:0002263	GO:0002263	cell activation involved in immune response	7/143	174/16119	0.000924177	0.0145973	0.0103331	TYROBP/HLA-DMB/FCER1G/CD40/HMOX1/NDFIP1/BATF	7
tan.GO:0002366	GO:0002366	leukocyte activation involved in immune response	7/143	174/16119	0.000924177	0.0145973	0.0103331	TYROBP/HLA-DMB/FCER1G/CD40/HMOX1/NDFIP1/BATF	7
tan.GO:0050728	GO:0050728	negative regulation of inflammatory response	5/143	85/16119	0.000951066	0.0149263	0.010566	APOE/ACP5/GPX1/TNFRSF1B/NDFIP1	5
tan.GO:0032496	GO:0032496	response to lipopolysaccharide	8/143	230/16119	0.0010378	0.0161693	0.0114459	LY96/CCL5/CD14/HCK/CD40/LITAF/ACP5/TNFRSF1B	8
tan.GO:0050866	GO:0050866	negative regulation of cell activation	6/143	130/16119	0.00106289	0.0161693	0.0114459	CD74/VSIG4/HLA-DRB1/APOE/HMOX1/NDFIP1	6
tan.GO:0034367	GO:0034367	macromolecular complex remodeling	3/143	23/16119	0.00106308	0.0161693	0.0114459	PLA2G7/APOE/APOC1	3
tan.GO:0034368	GO:0034368	protein-lipid complex remodeling	3/143	23/16119	0.00106308	0.0161693	0.0114459	PLA2G7/APOE/APOC1	3
tan.GO:0034369	GO:0034369	plasma lipoprotein particle remodeling	3/143	23/16119	0.00106308	0.0161693	0.0114459	PLA2G7/APOE/APOC1	3
tan.GO:0006958	GO:0006958	complement activation, classical pathway	4/143	51/16119	0.00107401	0.0162354	0.0114927	C1QA/C1QC/C1QB/CFI	4
tan.GO:0010759	GO:0010759	positive regulation of macrophage chemotaxis	2/143	6/16119	0.00114529	0.0169485	0.0119975	CCL5/C3AR1	2
tan.GO:0034447	GO:0034447	very-low-density lipoprotein particle clearance	2/143	6/16119	0.00114529	0.0169485	0.0119975	APOE/APOC1	2
tan.GO:2000501	GO:2000501	regulation of natural killer cell chemotaxis	2/143	6/16119	0.00114529	0.0169485	0.0119975	CCL5/CCL4	2
tan.GO:0072676	GO:0072676	lymphocyte migration	4/143	52/16119	0.00115558	0.0169485	0.0119975	AIF1/CCL5/MSN/CCL4	4
tan.GO:0097006	GO:0097006	regulation of plasma lipoprotein particle levels	4/143	52/16119	0.00115558	0.0169485	0.0119975	PLA2G7/APOE/APOC1/HMOX1	4
tan.GO:0090066	GO:0090066	regulation of anatomical structure size	10/143	351/16119	0.00116388	0.0169576	0.0120039	HCK/PREX1/APOE/RHOA/GPX1/AATK/HMOX1/SCPEP1/CAPG/SSH3	10
tan.GO:0072376	GO:0072376	protein activation cascade	5/143	89/16119	0.00116996	0.0169576	0.0120039	C1QA/C1QC/C1QB/VSIG4/CFI	5
tan.GO:0002720	GO:0002720	positive regulation of cytokine production involved in immune response	3/143	24/16119	0.00120709	0.0171923	0.0121701	FCER1G/CD74/GPRC5B	3
tan.GO:0043368	GO:0043368	positive T cell selection	3/143	24/16119	0.00120709	0.0171923	0.0121701	CD74/HLA-DMA/BATF	3
tan.GO:2000403	GO:2000403	positive regulation of lymphocyte migration	3/143	24/16119	0.00120709	0.0171923	0.0121701	AIF1/CCL5/CCL4	3
tan.GO:0055072	GO:0055072	iron ion homeostasis	5/143	90/16119	0.00123007	0.0174189	0.0123305	ATP6V1B2/HMOX1/FTL/NDFIP1/ATP6V0D1	5
tan.GO:0070997	GO:0070997	neuron death	8/143	239/16119	0.00132634	0.0186748	0.0132195	CCL5/APOE/LGMN/RHOA/GPX1/AATK/HMOX1/PPT1	8
tan.GO:0050850	GO:0050850	positive regulation of calcium-mediated signaling	3/143	25/16119	0.00136283	0.0190797	0.0135061	CD4/TREM2/CCL4	3
tan.GO:0050730	GO:0050730	regulation of peptidyl-tyrosine phosphorylation	7/143	187/16119	0.00140366	0.0195403	0.0138321	CCL5/CD4/CSF1R/CD74/TREM2/CD40/GPRC5B	7
tan.GO:0002824	GO:0002824	positive regulation of adaptive immune response based on somatic recombination of immune receptors built from immunoglobulin superfamily domains	4/143	55/16119	0.00142622	0.0197427	0.0139754	TNFSF13B/FCER1G/B2M/HLA-DQB2	4
tan.GO:0046916	GO:0046916	cellular transition metal ion homeostasis	5/143	94/16119	0.00149354	0.0205592	0.0145534	ATP6V1B2/HMOX1/FTL/NDFIP1/ATP6V0D1	5
tan.GO:1903035	GO:1903035	negative regulation of response to wounding	5/143	95/16119	0.00156544	0.0210043	0.0148685	APOE/ACP5/GPX1/TNFRSF1B/NDFIP1	5
tan.GO:0018108	GO:0018108	peptidyl-tyrosine phosphorylation	9/143	304/16119	0.00157504	0.0210043	0.0148685	CCL5/CD4/CSF1R/CD74/TREM2/HCK/CD40/AATK/GPRC5B	9
tan.GO:0006538	GO:0006538	glutamate catabolic process	2/143	7/16119	0.00159408	0.0210043	0.0148685	GLUL/GLUD1	2
tan.GO:0010873	GO:0010873	positive regulation of cholesterol esterification	2/143	7/16119	0.00159408	0.0210043	0.0148685	APOE/APOC1	2
tan.GO:0034382	GO:0034382	chylomicron remnant clearance	2/143	7/16119	0.00159408	0.0210043	0.0148685	APOE/APOC1	2
tan.GO:0042159	GO:0042159	lipoprotein catabolic process	2/143	7/16119	0.00159408	0.0210043	0.0148685	APOE/PPT1	2
tan.GO:0060907	GO:0060907	positive regulation of macrophage cytokine production	2/143	7/16119	0.00159408	0.0210043	0.0148685	CD74/GPRC5B	2
tan.GO:0071830	GO:0071830	triglyceride-rich lipoprotein particle clearance	2/143	7/16119	0.00159408	0.0210043	0.0148685	APOE/APOC1	2
tan.GO:0002367	GO:0002367	cytokine production involved in immune response	4/143	57/16119	0.00162942	0.0213558	0.0151173	FCER1G/CD74/HMOX1/GPRC5B	4
tan.GO:1903036	GO:1903036	positive regulation of response to wounding	5/143	96/16119	0.00163984	0.0213647	0.0151236	PLA2G7/FCER1G/TGM2/CTSS/GPRC5B	5
tan.GO:0018212	GO:0018212	peptidyl-tyrosine modification	9/143	306/16119	0.00164744	0.0213647	0.0151236	CCL5/CD4/CSF1R/CD74/TREM2/HCK/CD40/AATK/GPRC5B	9
tan.GO:0008154	GO:0008154	actin polymerization or depolymerization	6/143	143/16119	0.00173321	0.0223069	0.0157906	AIF1/HCK/PREX1/RHOA/CAPG/SSH3	6
tan.GO:0002821	GO:0002821	positive regulation of adaptive immune response	4/143	58/16119	0.0017382	0.0223069	0.0157906	TNFSF13B/FCER1G/B2M/HLA-DQB2	4
tan.GO:0002761	GO:0002761	regulation of myeloid leukocyte differentiation	5/143	98/16119	0.00179641	0.0229344	0.0162348	TYROBP/C1QC/CSF1/NDFIP1/FAM213A	5
tan.GO:0030593	GO:0030593	neutrophil chemotaxis	4/143	59/16119	0.00185192	0.0235213	0.0166502	C3AR1/FCER1G/CD74/PREX1	4
tan.GO:0071622	GO:0071622	regulation of granulocyte chemotaxis	3/143	28/16119	0.00190379	0.0240561	0.0170288	CCL5/C3AR1/CD74	3
tan.GO:0098542	GO:0098542	defense response to other organism	10/143	379/16119	0.00205379	0.0256485	0.018156	CD4/FCER1G/SLAMF8/SAMHD1/B2M/HCK/STAB1/CD40/ACP5/BATF	10
tan.GO:1990266	GO:1990266	neutrophil migration	4/143	61/16119	0.00209465	0.0256485	0.018156	C3AR1/FCER1G/CD74/PREX1	4
tan.GO:0002702	GO:0002702	positive regulation of production of molecular mediator of immune response	3/143	29/16119	0.00210976	0.0256485	0.018156	FCER1G/CD74/GPRC5B	3
tan.GO:0050690	GO:0050690	regulation of defense response to virus by virus	3/143	29/16119	0.00210976	0.0256485	0.018156	CD4/B2M/HCK	3
tan.GO:0009313	GO:0009313	oligosaccharide catabolic process	2/143	8/16119	0.00211309	0.0256485	0.018156	GM2A/HEXB	2
tan.GO:0035747	GO:0035747	natural killer cell chemotaxis	2/143	8/16119	0.00211309	0.0256485	0.018156	CCL5/CCL4	2
tan.GO:0070099	GO:0070099	regulation of chemokine-mediated signaling pathway	2/143	8/16119	0.00211309	0.0256485	0.018156	CCL5/TREM2	2
tan.GO:0071801	GO:0071801	regulation of podosome assembly	2/143	8/16119	0.00211309	0.0256485	0.018156	HCK/RHOA	2
tan.GO:0051402	GO:0051402	neuron apoptotic process	7/143	204/16119	0.00230171	0.027801	0.0196797	APOE/LGMN/RHOA/GPX1/AATK/HMOX1/PPT1	7
tan.GO:0002548	GO:0002548	monocyte chemotaxis	3/143	30/16119	0.00232907	0.0278055	0.0196829	AIF1/CCL5/PLA2G7	3
tan.GO:0042092	GO:0042092	type 2 immune response	3/143	30/16119	0.00232907	0.0278055	0.0196829	CD74/NDFIP1/BATF	3
tan.GO:0043623	GO:0043623	cellular protein complex assembly	10/143	386/16119	0.0023458	0.0278055	0.0196829	AIF1/CCL5/HLA-DMB/HLA-DRA/HLA-DRB1/HCK/HLA-DMA/PREX1/RHOA/CAPG	10
tan.GO:0044242	GO:0044242	cellular lipid catabolic process	6/143	152/16119	0.00235802	0.0278055	0.0196829	GM2A/APOC1/HEXB/PPT1/NAGA/PHYH	6
tan.GO:0042311	GO:0042311	vasodilation	4/143	63/16119	0.0023585	0.0278055	0.0196829	APOE/GPX1/HMOX1/SCPEP1	4
tan.GO:0034381	GO:0034381	plasma lipoprotein particle clearance	3/143	31/16119	0.00256199	0.0298264	0.0211134	APOE/APOC1/HMOX1	3
tan.GO:0071827	GO:0071827	plasma lipoprotein particle organization	3/143	31/16119	0.00256199	0.0298264	0.0211134	PLA2G7/APOE/APOC1	3
tan.GO:1901214	GO:1901214	regulation of neuron death	7/143	208/16119	0.00256623	0.0298264	0.0211134	CCL5/APOE/LGMN/RHOA/GPX1/HMOX1/PPT1	7
tan.GO:0006672	GO:0006672	ceramide metabolic process	4/143	65/16119	0.00264439	0.0305199	0.0216044	GM2A/ASAH1/HEXB/NAGA	4
tan.GO:0097193	GO:0097193	intrinsic apoptotic signaling pathway	8/143	267/16119	0.00265068	0.0305199	0.0216044	CD74/YWHAH/GZMB/ARL6IP5/BCL2A1/GPX1/HMOX1/TNFRSF1B	8
tan.GO:0002480	GO:0002480	antigen processing and presentation of exogenous peptide antigen via MHC class I, TAP-independent	2/143	9/16119	0.00270105	0.0306699	0.0217106	B2M/CTSS	2
tan.GO:0010872	GO:0010872	regulation of cholesterol esterification	2/143	9/16119	0.00270105	0.0306699	0.0217106	APOE/APOC1	2
tan.GO:0048302	GO:0048302	regulation of isotype switching to IgG isotypes	2/143	9/16119	0.00270105	0.0306699	0.0217106	CD40/NDFIP1	2
tan.GO:0051702	GO:0051702	interaction with symbiont	3/143	32/16119	0.00280881	0.0316023	0.0223706	CCL5/CCL4/GPX1	3
tan.GO:0061098	GO:0061098	positive regulation of protein tyrosine kinase activity	3/143	32/16119	0.00280881	0.0316023	0.0223706	CCL5/CSF1R/GPRC5B	3
tan.GO:0050795	GO:0050795	regulation of behavior	6/143	159/16119	0.00295093	0.0330504	0.0233956	AIF1/CCL5/C3AR1/PLA2G7/CD74/CCL4	6
tan.GO:0045089	GO:0045089	positive regulation of innate immune response	7/143	214/16119	0.00300618	0.0335169	0.0237258	LY96/CCL5/CTSL/CD14/HCK/LGMN/CTSS	7
tan.GO:0071825	GO:0071825	protein-lipid complex subunit organization	3/143	33/16119	0.00306979	0.0340719	0.0241188	PLA2G7/APOE/APOC1	3
tan.GO:0031348	GO:0031348	negative regulation of defense response	5/143	111/16119	0.00309371	0.0341834	0.0241977	APOE/ACP5/GPX1/TNFRSF1B/NDFIP1	5
tan.GO:0007584	GO:0007584	response to nutrient	6/143	161/16119	0.00313917	0.0345309	0.0244437	CYBB/USF1/GPX1/HMOX1/ARSA/GATM	6
tan.GO:0045088	GO:0045088	regulation of innate immune response	8/143	275/16119	0.00317469	0.0347664	0.0246104	LY96/CCL5/SAMHD1/CTSL/CD14/HCK/LGMN/CTSS	8
tan.GO:0031667	GO:0031667	response to nutrient levels	9/143	339/16119	0.00327943	0.0357545	0.0253098	CYBB/USF1/GPX1/GLUL/HMOX1/SLC22A3/CTSD/ARSA/GATM	9
tan.GO:0010758	GO:0010758	regulation of macrophage chemotaxis	2/143	10/16119	0.00335671	0.0359606	0.0254557	CCL5/C3AR1	2
tan.GO:0045059	GO:0045059	positive thymic T cell selection	2/143	10/16119	0.00335671	0.0359606	0.0254557	CD74/HLA-DMA	2
tan.GO:0048291	GO:0048291	isotype switching to IgG isotypes	2/143	10/16119	0.00335671	0.0359606	0.0254557	CD40/NDFIP1	2
tan.GO:0071675	GO:0071675	regulation of mononuclear cell migration	2/143	10/16119	0.00335671	0.0359606	0.0254557	CCL5/C3AR1	2
tan.GO:0030041	GO:0030041	actin filament polymerization	5/143	115/16119	0.00360198	0.0384211	0.0271974	AIF1/HCK/PREX1/RHOA/CAPG	5
tan.GO:0030890	GO:0030890	positive regulation of B cell proliferation	3/143	35/16119	0.00363527	0.038609	0.0273305	TNFSF13B/CD74/CD40	3
tan.GO:0097028	GO:0097028	dendritic cell differentiation	3/143	36/16119	0.00394024	0.0416684	0.0294961	SPI1/TREM2/BATF	3
tan.GO:0045785	GO:0045785	positive regulation of cell adhesion	6/143	169/16119	0.003983	0.0417024	0.0295202	CCL5/PREX1/TGM2/NINJ1/RHOA/CSF1	6
tan.GO:0033077	GO:0033077	T cell differentiation in thymus	4/143	73/16119	0.00402578	0.0417024	0.0295202	MAFB/CD74/B2M/HLA-DMA	4
tan.GO:0010935	GO:0010935	regulation of macrophage cytokine production	2/143	11/16119	0.00407885	0.0417024	0.0295202	CD74/GPRC5B	2
tan.GO:0033700	GO:0033700	phospholipid efflux	2/143	11/16119	0.00407885	0.0417024	0.0295202	APOE/APOC1	2
tan.GO:0034374	GO:0034374	low-density lipoprotein particle remodeling	2/143	11/16119	0.00407885	0.0417024	0.0295202	PLA2G7/APOE	2
tan.GO:0051085	GO:0051085	chaperone mediated protein folding requiring cofactor	2/143	11/16119	0.00407885	0.0417024	0.0295202	CD74/HLA-DMA	2
tan.GO:0071674	GO:0071674	mononuclear cell migration	2/143	11/16119	0.00407885	0.0417024	0.0295202	CCL5/C3AR1	2
tan.GO:0097067	GO:0097067	cellular response to thyroid hormone stimulus	2/143	11/16119	0.00407885	0.0417024	0.0295202	CTSL/CTSS	2
tan.GO:0032102	GO:0032102	negative regulation of response to external stimulus	6/143	170/16119	0.00409922	0.0417375	0.0295451	AIF1/APOE/ACP5/GPX1/TNFRSF1B/NDFIP1	6
tan.GO:0032535	GO:0032535	regulation of cellular component size	7/143	227/16119	0.00415614	0.042086	0.0297918	HCK/PREX1/APOE/RHOA/AATK/CAPG/SSH3	7
tan.GO:0002703	GO:0002703	regulation of leukocyte mediated immunity	5/143	119/16119	0.00416761	0.042086	0.0297918	FCER1G/B2M/CD40/HMOX1/NDFIP1	5
tan.GO:0051051	GO:0051051	negative regulation of transport	9/143	352/16119	0.00419538	0.0421585	0.0298431	SRGN/CD74/APOE/LITAF/ARL6IP5/APOC1/HMOX1/NDFIP1/MMP9	9
tan.GO:0050868	GO:0050868	negative regulation of T cell activation	4/143	74/16119	0.00422697	0.0421585	0.0298431	CD74/VSIG4/HLA-DRB1/NDFIP1	4
tan.GO:0002204	GO:0002204	somatic recombination of immunoglobulin genes involved in immune response	3/143	37/16119	0.00426034	0.0421585	0.0298431	CD40/NDFIP1/BATF	3
tan.GO:0002208	GO:0002208	somatic diversification of immunoglobulins involved in immune response	3/143	37/16119	0.00426034	0.0421585	0.0298431	CD40/NDFIP1/BATF	3
tan.GO:0045190	GO:0045190	isotype switching	3/143	37/16119	0.00426034	0.0421585	0.0298431	CD40/NDFIP1/BATF	3
tan.GO:0002695	GO:0002695	negative regulation of leukocyte activation	5/143	120/16119	0.00431839	0.042562	0.0301287	CD74/VSIG4/HLA-DRB1/HMOX1/NDFIP1	5
tan.GO:0002758	GO:0002758	innate immune response-activating signal transduction	6/143	174/16119	0.00458936	0.0447589	0.0316838	LY96/CTSL/CD14/HCK/LGMN/CTSS	6
tan.GO:0033344	GO:0033344	cholesterol efflux	3/143	38/16119	0.00459578	0.0447589	0.0316838	NPC2/APOE/APOC1	3
tan.GO:0050848	GO:0050848	regulation of calcium-mediated signaling	3/143	38/16119	0.00459578	0.0447589	0.0316838	CD4/TREM2/CCL4	3
tan.GO:0002262	GO:0002262	myeloid cell homeostasis	5/143	122/16119	0.00463156	0.0447847	0.0317021	MAFB/SPI1/FCER1G/DNASE2/HMOX1	5
tan.GO:0048660	GO:0048660	regulation of smooth muscle cell proliferation	4/143	76/16119	0.00464952	0.0447847	0.0317021	AIF1/CCL5/TGM2/HMOX1	4
tan.GO:0007265	GO:0007265	Ras protein signal transduction	7/143	233/16119	0.00478748	0.0447847	0.0317021	AIF1/APOE/RHOA/PLK2/AATK/CSF1/SDCBP	7
tan.GO:0055076	GO:0055076	transition metal ion homeostasis	5/143	123/16119	0.00479405	0.0447847	0.0317021	ATP6V1B2/HMOX1/FTL/NDFIP1/ATP6V0D1	5
tan.GO:0002283	GO:0002283	neutrophil activation involved in immune response	2/143	12/16119	0.00486625	0.0447847	0.0317021	TYROBP/FCER1G	2
tan.GO:0010934	GO:0010934	macrophage cytokine production	2/143	12/16119	0.00486625	0.0447847	0.0317021	CD74/GPRC5B	2
tan.GO:0019883	GO:0019883	antigen processing and presentation of endogenous antigen	2/143	12/16119	0.00486625	0.0447847	0.0317021	CD74/ERAP2	2
tan.GO:0032372	GO:0032372	negative regulation of sterol transport	2/143	12/16119	0.00486625	0.0447847	0.0317021	APOE/APOC1	2
tan.GO:0032375	GO:0032375	negative regulation of cholesterol transport	2/143	12/16119	0.00486625	0.0447847	0.0317021	APOE/APOC1	2
tan.GO:0034433	GO:0034433	steroid esterification	2/143	12/16119	0.00486625	0.0447847	0.0317021	APOE/APOC1	2
tan.GO:0034434	GO:0034434	sterol esterification	2/143	12/16119	0.00486625	0.0447847	0.0317021	APOE/APOC1	2
tan.GO:0034435	GO:0034435	cholesterol esterification	2/143	12/16119	0.00486625	0.0447847	0.0317021	APOE/APOC1	2
tan.GO:0043922	GO:0043922	negative regulation by host of viral transcription	2/143	12/16119	0.00486625	0.0447847	0.0317021	CCL5/CCL4	2
tan.GO:0071800	GO:0071800	podosome assembly	2/143	12/16119	0.00486625	0.0447847	0.0317021	HCK/RHOA	2
tan.GO:0030574	GO:0030574	collagen catabolic process	4/143	77/16119	0.00487107	0.0447847	0.0317021	CTSL/CTSS/CTSD/MMP9	4
tan.GO:0002437	GO:0002437	inflammatory response to antigenic stimulus	3/143	39/16119	0.00494678	0.0451439	0.0319564	FCER1G/HLA-DRB1/GPX1	3
tan.GO:0002889	GO:0002889	regulation of immunoglobulin mediated immune response	3/143	39/16119	0.00494678	0.0451439	0.0319564	FCER1G/CD40/NDFIP1	3
tan.GO:0009991	GO:0009991	response to extracellular stimulus	9/143	364/16119	0.00520828	0.0469499	0.0332348	CYBB/USF1/GPX1/GLUL/HMOX1/SLC22A3/CTSD/ARSA/GATM	9
tan.GO:0043524	GO:0043524	negative regulation of neuron apoptotic process	5/143	126/16119	0.00530583	0.0469499	0.0332348	APOE/LGMN/RHOA/HMOX1/PPT1	5
tan.GO:0002712	GO:0002712	regulation of B cell mediated immunity	3/143	40/16119	0.00531353	0.0469499	0.0332348	FCER1G/CD40/NDFIP1	3
tan.GO:0030195	GO:0030195	negative regulation of blood coagulation	3/143	40/16119	0.00531353	0.0469499	0.0332348	APOE/USF1/PLAUR	3
tan.GO:0042246	GO:0042246	tissue regeneration	3/143	40/16119	0.00531353	0.0469499	0.0332348	NINJ1/GPX1/GATM	3
tan.GO:1900047	GO:1900047	negative regulation of hemostasis	3/143	40/16119	0.00531353	0.0469499	0.0332348	APOE/USF1/PLAUR	3
tan.GO:0030193	GO:0030193	regulation of blood coagulation	4/143	79/16119	0.00533522	0.0469499	0.0332348	FCER1G/APOE/USF1/PLAUR	4
tan.GO:0042590	GO:0042590	antigen processing and presentation of exogenous peptide antigen via MHC class I	4/143	79/16119	0.00533522	0.0469499	0.0332348	CYBB/FCER1G/B2M/CTSS	4
tan.GO:0048659	GO:0048659	smooth muscle cell proliferation	4/143	79/16119	0.00533522	0.0469499	0.0332348	AIF1/CCL5/TGM2/HMOX1	4
tan.GO:1900046	GO:1900046	regulation of hemostasis	4/143	79/16119	0.00533522	0.0469499	0.0332348	FCER1G/APOE/USF1/PLAUR	4
tan.GO:0009615	GO:0009615	response to virus	8/143	301/16119	0.00545076	0.047796	0.0338337	CCL5/CD4/SAMHD1/B2M/CCL4/HCK/NPC2/CD40	8
tan.GO:0008064	GO:0008064	regulation of actin polymerization or depolymerization	5/143	127/16119	0.0054847	0.0479231	0.0339237	HCK/PREX1/RHOA/CAPG/SSH3	5
tan.GO:0002218	GO:0002218	activation of innate immune response	6/143	181/16119	0.00554924	0.0481455	0.0340812	LY96/CTSL/CD14/HCK/LGMN/CTSS	6
tan.GO:0043523	GO:0043523	regulation of neuron apoptotic process	6/143	181/16119	0.00554924	0.0481455	0.0340812	APOE/LGMN/RHOA/GPX1/HMOX1/PPT1	6
tan.GO:0030832	GO:0030832	regulation of actin filament length	5/143	128/16119	0.00566779	0.0487343	0.0344979	HCK/PREX1/RHOA/CAPG/SSH3	5
tan.GO:0050880	GO:0050880	regulation of blood vessel size	5/143	128/16119	0.00566779	0.0487343	0.0344979	APOE/RHOA/GPX1/HMOX1/SCPEP1	5
tan.GO:0009311	GO:0009311	oligosaccharide metabolic process	3/143	41/16119	0.00569622	0.0487343	0.0344979	GM2A/HEXB/NAGA	3
tan.GO:2000107	GO:2000107	negative regulation of leukocyte apoptotic process	3/143	41/16119	0.00569622	0.0487343	0.0344979	CCL5/FCER1G/CD74	3
tan.GO:0060033	GO:0060033	anatomical structure regression	2/143	13/16119	0.00571771	0.0487489	0.0345083	SPI1/NINJ1	2
tan.GO:0030168	GO:0030168	platelet activation	7/143	241/16119	0.00573871	0.0487592	0.0345156	SRGN/FCER1G/CD40/APOE/RHOA/PSAP/SERPINA1	7
tan.GO:0035150	GO:0035150	regulation of tube size	5/143	129/16119	0.00585515	0.0495776	0.0350949	APOE/RHOA/GPX1/HMOX1/SCPEP1	5
tan.GO:0070201	GO:0070201	regulation of establishment of protein localization	10/143	440/16119	0.0058943	0.0497382	0.0352086	SRGN/CSF1R/HLA-DRB1/CD14/YWHAH/CD40/GZMB/LITAF/RHOA/NDFIP1	10
turquoise.GO:0030036	GO:0030036	actin cytoskeleton organization	65/994	484/16119	2.2258e-09	1.28629e-05	1.15179e-05	PARVA/CORO1C/GSN/PDLIM3/CNN3/DPYSL3/PIP5K1C/FLNA/INF2/MEF2A/MYLK/SORBS1/PDLIM7/ABL1/MYH11/ADD1/TPM1/USH1C/SHROOM3/CNN1/BAIAP2L2/EHD2/TLN1/BCL6/AQP1/ARF1/RDX/VILL/DAPK3/DSTN/ACTN1/WASF2/MYH14/ITGB1/SLC9A3R1/MICAL2/MYADM/CORO2A/CXADR/PAM/PRKCD/CALR/PRKCDBP/ZYX/ANG/CD2AP/KRT8/ITPKA/CXCL1/F2RL1/FHL3/PLEK2/ARPC5/ATP2C1/SRF/EZR/DIAPH1/RAC1/CAPZA1/ENAH/CORO1B/LIMA1/NRAS/RALA/PRKCI	65
turquoise.GO:0034976	GO:0034976	response to endoplasmic reticulum stress	29/994	146/16119	1.72572e-08	4.98646e-05	4.46506e-05	FAM129A/ERN2/ADD1/GFPT1/PDIA4/HSPA5/VCP/TLN1/CCDC47/P4HB/WFS1/KDELR3/TMX4/AIFM1/CALR/PDIA3/PDX1/ACADVL/ANKS4B/VIMP/DNAJB11/TNFRSF10B/CREB3/SRPRB/ERP44/OS9/SERP1/TXNDC11/DDIT3	29
turquoise.GO:0045454	GO:0045454	cell redox homeostasis	17/994	60/16119	7.31387e-08	0.000140889	0.000126158	PDIA4/QSOX1/SELT/P4HB/SEPW1/TMX4/AIFM1/PDIA3/VIMP/TXNDC12/PRDX4/TXNRD1/ERP44/GSR/TXNDC11/DDIT3/TMX2	17
turquoise.GO:0009100	GO:0009100	glycoprotein metabolic process	52/994	391/16119	1.26779e-07	0.000180331	0.000161475	GMPPA/B3GNT3/BACE2/CANT1/GALNT3/B4GALT1/MUC13/GFPT1/B3GNT7/VCP/ALG3/EDEM3/SEC23A/SDC3/C1GALT1/HSPG2/FUT2/GALNT5/CSPG4/CALR/PDIA3/MUC1/MLEC/RPN1/DPAGT1/MGAT4B/CHP1/GCNT3/RAB1A/GPC4/SDC2/B3GNT2/FUT4/MAGT1/RAMP1/TMEM59/GCNT1/UAP1/ST6GALNAC1/CHST15/BMP2/SRD5A3/ERP44/FUT8/ARF4/SERP1/STT3A/OSTC/HBEGF/C1GALT1C1/SDC1/TMEM165	52
turquoise.GO:0010256	GO:0010256	endomembrane system organization	49/994	361/16119	1.56284e-07	0.000180331	0.000161475	CLIP3/SORBS1/ARHGEF16/FA2H/MYRF/ATP1B1/CDH1/VAMP7/GAK/EHD2/ANO6/REEP3/NBEAL2/TMEM43/AQP1/FNBP1L/FAM109A/GOLGA5/ATL3/GAS6/ITGB1/MYADM/MICALL1/SEC61A1/CLCN3/TMED10/CLU/RTN4/AMN/REEP4/CIB1/CRB3/RAB1A/TESC/PPP2CA/RAB2A/RAMP1/TMEM59/TMED2/GOLPH3L/RAC1/ATL2/RER1/KRT18/TSPAN15/FAM160A2/SERP1/PRKCI/ATP1B3	49
turquoise.GO:0030155	GO:0030155	regulation of cell adhesion	46/994	331/16119	1.87227e-07	0.000180331	0.000161475	SOX9/EFNA1/MYO10/GSN/UTRN/CITED2/EPCAM/ABL1/TPM1/STAT5B/FOXF1/CDH1/DPP4/TNC/LAMA4/LGALS1/BCL6/SMOC2/CASK/DAPK3/ITGA6/ITGB1/LDB1/ITGA5/MYADM/CYTH3/PRKCD/ADAM15/CALR/FZD7/NID1/CIB1/TESC/PPP2CA/ADAM9/KLF4/SPOCK1/SRF/RAC1/BMP2/FOXA1/PKP4/ITGA2/LYN/CDK6/PPP1CB	46
turquoise.GO:0034329	GO:0034329	cell junction assembly	33/994	203/16119	2.87325e-07	0.000213484	0.000191162	RAP1A/F11R/PARVA/PIP5K1C/FLNA/TNS1/PRKACA/RSU1/SORBS1/UGT8/VCL/FLNC/CDH1/TLN1/DAPK3/ACTN1/GJA1/ITGA6/ITGB1/ITGA5/ACTB/CRB3/TESK1/PARD6B/LAMC1/SRF/RAC1/CD151/PKP4/CLDN18/MYO1C/PVRL3/PRKCI	33
turquoise.GO:0007009	GO:0007009	plasma membrane organization	30/994	176/16119	3.48146e-07	0.000213484	0.000191162	CLIP3/SORBS1/ARHGEF16/FA2H/MYRF/ATP1B1/CDH1/VAMP7/EHD2/ANO6/FNBP1L/GAS6/ITGB1/MYADM/MICALL1/CLU/AMN/CIB1/CRB3/TESC/RAMP1/TMEM59/TMED2/RAC1/RER1/KRT18/TSPAN15/SERP1/PRKCI/ATP1B3	30
turquoise.GO:0070085	GO:0070085	glycosylation	40/994	276/16119	3.89842e-07	0.000213484	0.000191162	GMPPA/B3GNT3/GALNT3/B4GALT1/MUC13/GFPT1/B3GNT7/VCP/ALG3/EDEM3/SEC23A/C1GALT1/FUT2/GALNT5/CALR/PDIA3/MUC1/MLEC/RPN1/DPAGT1/MGAT4B/CHP1/GCNT3/SLC35C1/B3GNT2/FUT4/MAGT1/RAMP1/TMEM59/GCNT1/UAP1/ST6GALNAC1/SRD5A3/FUT8/ARF4/SERP1/STT3A/OSTC/C1GALT1C1/TMEM165	40
turquoise.GO:0019318	GO:0019318	hexose metabolic process	38/994	256/16119	4.11434e-07	0.000213484	0.000191162	GALE/GYG1/SLC35A2/PRKACA/PFKFB2/SORBS1/B4GALT1/CRYAB/GFPT1/PRKACB/IRS1/RPIA/FUT2/PDK4/ENO2/GOT1/PDX1/HK2/VIMP/GALM/G6PD/PCK2/PDHA1/AKR1A1/HKDC1/FUT4/CHST15/PKM/PGK1/FBP1/FUT8/MDH2/FUCA1/GPD2/PFKP/TALDO1/SERP1/PPP1CB	38
turquoise.GO:0006486	GO:0006486	protein glycosylation	39/994	267/16119	4.43296e-07	0.000213484	0.000191162	GMPPA/B3GNT3/GALNT3/B4GALT1/MUC13/GFPT1/B3GNT7/VCP/ALG3/EDEM3/SEC23A/C1GALT1/FUT2/GALNT5/CALR/PDIA3/MUC1/MLEC/RPN1/DPAGT1/MGAT4B/CHP1/GCNT3/B3GNT2/FUT4/MAGT1/RAMP1/TMEM59/GCNT1/UAP1/ST6GALNAC1/SRD5A3/FUT8/ARF4/SERP1/STT3A/OSTC/C1GALT1C1/TMEM165	39
turquoise.GO:0043413	GO:0043413	macromolecule glycosylation	39/994	267/16119	4.43296e-07	0.000213484	0.000191162	GMPPA/B3GNT3/GALNT3/B4GALT1/MUC13/GFPT1/B3GNT7/VCP/ALG3/EDEM3/SEC23A/C1GALT1/FUT2/GALNT5/CALR/PDIA3/MUC1/MLEC/RPN1/DPAGT1/MGAT4B/CHP1/GCNT3/B3GNT2/FUT4/MAGT1/RAMP1/TMEM59/GCNT1/UAP1/ST6GALNAC1/SRD5A3/FUT8/ARF4/SERP1/STT3A/OSTC/C1GALT1C1/TMEM165	39
turquoise.GO:0005996	GO:0005996	monosaccharide metabolic process	40/994	290/16119	1.4221e-06	0.000632179	0.000566077	GALE/GYG1/SLC35A2/PRKACA/PFKFB2/SORBS1/B4GALT1/CRYAB/GFPT1/PRKACB/IRS1/CYB5R3/RPIA/FUT2/PDK4/ENO2/GOT1/PDX1/HK2/VIMP/GALM/G6PD/PCK2/PDHA1/AKR1A1/HKDC1/FUT4/CHST15/PKM/PGK1/FBP1/FUT8/MDH2/FUCA1/GPD2/PFKP/TALDO1/SERP1/UGDH/PPP1CB	40
turquoise.GO:0034330	GO:0034330	cell junction organization	34/994	229/16119	1.64944e-06	0.000636742	0.000570163	RAP1A/F11R/PARVA/PIP5K1C/FLNA/TNS1/PRKACA/RSU1/SORBS1/UGT8/VCL/FLNC/CDH1/TLN1/DAPK3/ACTN1/GJA1/ITGA6/ITGB1/ITGA5/ACTB/CXADR/CRB3/TESK1/PARD6B/LAMC1/SRF/RAC1/CD151/PKP4/CLDN18/MYO1C/PVRL3/PRKCI	34
turquoise.GO:0009101	GO:0009101	glycoprotein biosynthetic process	44/994	335/16119	1.65273e-06	0.000636742	0.000570163	GMPPA/B3GNT3/BACE2/CANT1/GALNT3/B4GALT1/MUC13/GFPT1/B3GNT7/VCP/ALG3/EDEM3/SEC23A/C1GALT1/FUT2/GALNT5/CSPG4/CALR/PDIA3/MUC1/MLEC/RPN1/DPAGT1/MGAT4B/CHP1/GCNT3/B3GNT2/FUT4/MAGT1/RAMP1/TMEM59/GCNT1/UAP1/ST6GALNAC1/CHST15/SRD5A3/FUT8/ARF4/SERP1/STT3A/OSTC/HBEGF/C1GALT1C1/TMEM165	44
turquoise.GO:0098602	GO:0098602	single organism cell adhesion	47/994	372/16119	2.21365e-06	0.000799543	0.000715941	SOX9/EFNA1/AXL/MYO10/PARVA/CITED2/PIP5K1C/FLNA/EPCAM/VCL/CSRP1/MYL9/FOXF1/CDH1/DPP4/TLN1/LGALS1/CEACAM5/RAP2B/ITGA6/GAS6/ITGB1/PODXL2/ITGA5/ACTB/MYADM/CXADR/PRKCD/CALR/FZD7/CIB1/CD2AP/RAB1A/VNN1/LAMC1/ADAM9/KLF4/GCNT1/SRF/EZR/RAC1/BMP2/FOXA1/PKP4/LYN/PVRL3/CD58	47
turquoise.GO:0009308	GO:0009308	amine metabolic process	31/994	208/16119	4.33127e-06	0.00147238	0.00131842	AOC3/SLC44A3/SLC44A4/PNKD/ATP2B4/AOC1/CDS1/SMPDL3B/CHDH/SGMS2/LDLR/PRKCD/GOT1/ENOPH1/NQO1/SMPD3/PSMC2/SLC44A1/PSMA4/LPCAT3/DDC/PSMA5/HPRT1/MAOB/LPCAT4/PSMD13/AGMAT/PLBD1/SAT1/SPTLC2/SMPDL3A	31
turquoise.GO:0018279	GO:0018279	protein N-linked glycosylation via asparagine	19/994	96/16119	5.21744e-06	0.00167509	0.00149994	GMPPA/B4GALT1/GFPT1/VCP/ALG3/EDEM3/SEC23A/CALR/PDIA3/MLEC/RPN1/DPAGT1/MGAT4B/MAGT1/UAP1/SRD5A3/FUT8/STT3A/OSTC	19
turquoise.GO:0018196	GO:0018196	peptidyl-asparagine modification	19/994	97/16119	6.11891e-06	0.00175623	0.00157259	GMPPA/B4GALT1/GFPT1/VCP/ALG3/EDEM3/SEC23A/CALR/PDIA3/MLEC/RPN1/DPAGT1/MGAT4B/MAGT1/UAP1/SRD5A3/FUT8/STT3A/OSTC	19
turquoise.GO:0072659	GO:0072659	protein localization to plasma membrane	23/994	133/16119	6.1908e-06	0.00175623	0.00157259	CLIP3/SORBS1/ARHGEF16/ATP1B1/CDH1/VAMP7/EHD2/GAS6/ITGB1/MYADM/AMN/CIB1/CRB3/TESC/RAMP1/TMEM59/TMED2/RAC1/RER1/KRT18/TSPAN15/PRKCI/ATP1B3	23
turquoise.GO:0006487	GO:0006487	protein N-linked glycosylation	20/994	106/16119	6.38187e-06	0.00175623	0.00157259	GMPPA/B4GALT1/GFPT1/VCP/ALG3/EDEM3/SEC23A/CALR/PDIA3/MLEC/RPN1/DPAGT1/MGAT4B/MAGT1/UAP1/SRD5A3/FUT8/STT3A/OSTC/TMEM165	20
turquoise.GO:0043687	GO:0043687	post-translational protein modification	31/994	213/16119	7.1228e-06	0.00187103	0.00167539	CRTAP/GMPPA/B3GNT3/GALNT3/B4GALT1/MUC13/GFPT1/B3GNT7/ARSD/ALG3/EDEM3/SEC23A/C1GALT1/GAS6/GALNT5/CALR/PDIA3/MUC1/MLEC/RPN1/DPAGT1/MGAT4B/GCNT3/B3GNT2/MAGT1/GCNT1/UAP1/SRD5A3/FUT8/STT3A/C1GALT1C1	31
turquoise.GO:0003012	GO:0003012	muscle system process	41/994	321/16119	7.46064e-06	0.00187457	0.00167856	GUCY1A3/RGS2/UTRN/MYL6/MRVI1/ACTA2/PRKACA/PLN/CALD1/LMOD1/MYLK/SORBS1/HSPB6/ATP2B4/VCL/ATP1A1/MYH11/TPM1/MYL9/ANXA6/CAV1/ATP1B1/CRYAB/DES/CNN1/ACTG2/TLN1/SMTN/KCNQ1/TPM2/DAPK3/GJA1/MYH14/GATA6/KLF4/ATP2A2/SRF/ITGA2/TPM3/CAMTA2/SNTA1	41
turquoise.GO:0030198	GO:0030198	extracellular matrix organization	45/994	371/16119	1.0592e-05	0.00255046	0.00228378	SOX9/F11R/CRTAP/MFAP4/CRISPLD2/LTBP1/ELF3/GREM1/B4GALT1/MYH11/FOXF1/CDH1/SPINT1/DPP4/TNC/LAMA4/CASP3/LGALS3/SMOC2/CASK/SDC3/ACTN1/P4HB/LTBP3/ITGA6/GAS6/ITGB1/ITGA5/HSPG2/FOXF2/ADAM15/MMP15/TGFBR1/NID1/CIB1/SDC2/PTPRS/LAMC1/ADAM9/LAMB2/PRDX4/BMP2/CD151/ITGA2/SDC1	45
turquoise.GO:0043062	GO:0043062	extracellular structure organization	45/994	372/16119	1.13512e-05	0.00262395	0.00234959	SOX9/F11R/CRTAP/MFAP4/CRISPLD2/LTBP1/ELF3/GREM1/B4GALT1/MYH11/FOXF1/CDH1/SPINT1/DPP4/TNC/LAMA4/CASP3/LGALS3/SMOC2/CASK/SDC3/ACTN1/P4HB/LTBP3/ITGA6/GAS6/ITGB1/ITGA5/HSPG2/FOXF2/ADAM15/MMP15/TGFBR1/NID1/CIB1/SDC2/PTPRS/LAMC1/ADAM9/LAMB2/PRDX4/BMP2/CD151/ITGA2/SDC1	45
turquoise.GO:0044106	GO:0044106	cellular amine metabolic process	29/994	199/16119	1.35863e-05	0.00301982	0.00270406	SLC44A3/SLC44A4/PNKD/ATP2B4/CDS1/SMPDL3B/CHDH/SGMS2/LDLR/PRKCD/GOT1/ENOPH1/NQO1/SMPD3/PSMC2/SLC44A1/PSMA4/LPCAT3/DDC/PSMA5/HPRT1/MAOB/LPCAT4/PSMD13/AGMAT/PLBD1/SAT1/SPTLC2/SMPDL3A	29
turquoise.GO:0006936	GO:0006936	muscle contraction	36/994	274/16119	1.42298e-05	0.00304569	0.00272723	GUCY1A3/RGS2/UTRN/MYL6/MRVI1/ACTA2/PRKACA/PLN/CALD1/LMOD1/MYLK/SORBS1/HSPB6/VCL/ATP1A1/MYH11/TPM1/MYL9/ANXA6/CAV1/ATP1B1/CRYAB/DES/CNN1/ACTG2/TLN1/SMTN/KCNQ1/TPM2/DAPK3/GJA1/MYH14/SRF/ITGA2/TPM3/SNTA1	36
turquoise.GO:0035966	GO:0035966	response to topologically incorrect protein	23/994	142/16119	1.88035e-05	0.00388091	0.00347511	ADD1/GFPT1/HSPA5/VCP/EDEM3/TLN1/WFS1/KDELR3/CALR/CLU/ACADVL/VIMP/DNAJB11/DNAJB1/CREB3/SRPRB/HSPH1/TMBIM6/DNAJA1/MANF/ERP44/SERP1/DDIT3	23
turquoise.GO:0006986	GO:0006986	response to unfolded protein	22/994	134/16119	2.28403e-05	0.00432572	0.00387342	ADD1/GFPT1/HSPA5/VCP/EDEM3/TLN1/WFS1/KDELR3/CALR/ACADVL/VIMP/DNAJB11/DNAJB1/CREB3/SRPRB/HSPH1/TMBIM6/DNAJA1/MANF/ERP44/SERP1/DDIT3	22
turquoise.GO:0006457	GO:0006457	protein folding	30/994	215/16119	2.29338e-05	0.00432572	0.00387342	CRTAP/TUBA1A/BAG1/TUBB6/CRYAB/PDIA4/HSPA5/EDEM3/QSOX1/P4HB/WFS1/ACTB/TMX4/TOR4A/CALR/PDIA3/MLEC/CLU/DNAJA4/DNAJB11/DNAJB1/HSPH1/DNAJC1/PRDX4/DNAJA1/ERP44/FKBP11/BAG3/TXNDC11/PPIF	30
turquoise.GO:0048194	GO:0048194	Golgi vesicle budding	7/994	16/16119	2.32043e-05	0.00432572	0.00387342	COPG1/ARF1/TMED10/COPB2/TMED2/PRKCI/COPZ1	7
turquoise.GO:0043603	GO:0043603	cellular amide metabolic process	25/994	167/16119	3.31162e-05	0.00598058	0.00535524	PNKD/GGT6/IDH1/STAT5B/ASL/SMPDL3B/CPQ/GGT1/SGMS2/PAM/PRKCD/TMED10/CLU/VNN1/G6PD/SMPD3/XPNPEP1/GSR/SEC11A/SPTLC2/PPCS/MCCC2/SMPDL3A/CNDP2/MGST1	25
turquoise.GO:0071496	GO:0071496	cellular response to external stimulus	31/994	235/16119	5.08859e-05	0.0089112	0.00797943	SOX9/AXL/ATP1A1/AOC1/CAV1/HSPA5/TNC/ULK3/AQP1/GJA1/TP53INP2/ITGA6/GAS6/ITGB1/DAP/FOXA3/KLF10/PDK4/NCOA1/VDR/RAB1A/AKR1C3/TNFRSF10B/KIAA1324/BCL10/SRF/VAMP8/LYN/MAP1LC3A/BAG3/TNFRSF10A	31
turquoise.GO:0016337	GO:0016337	single organismal cell-cell adhesion	39/994	328/16119	6.28281e-05	0.0099709	0.00892832	SOX9/MYO10/PARVA/CITED2/PIP5K1C/FLNA/EPCAM/VCL/CSRP1/MYL9/FOXF1/CDH1/DPP4/TLN1/LGALS1/CEACAM5/RAP2B/ITGA6/GAS6/ITGB1/PODXL2/ITGA5/ACTB/MYADM/CXADR/PRKCD/CD2AP/VNN1/ADAM9/KLF4/GCNT1/SRF/EZR/BMP2/FOXA1/PKP4/LYN/PVRL3/CD58	39
turquoise.GO:0035964	GO:0035964	COPI-coated vesicle budding	6/994	13/16119	6.38386e-05	0.0099709	0.00892832	COPG1/ARF1/TMED10/COPB2/TMED2/COPZ1	6
turquoise.GO:0048200	GO:0048200	Golgi transport vesicle coating	6/994	13/16119	6.38386e-05	0.0099709	0.00892832	COPG1/ARF1/TMED10/COPB2/TMED2/COPZ1	6
turquoise.GO:0048205	GO:0048205	COPI coating of Golgi vesicle	6/994	13/16119	6.38386e-05	0.0099709	0.00892832	COPG1/ARF1/TMED10/COPB2/TMED2/COPZ1	6
turquoise.GO:0006900	GO:0006900	membrane budding	12/994	54/16119	8.70329e-05	0.0131445	0.0117701	COPG1/SEC23A/FNBP1L/ARF1/TMED10/TSG101/RAB1A/COPB2/TMED2/CLINT1/PRKCI/COPZ1	12
turquoise.GO:0048863	GO:0048863	stem cell differentiation	37/994	310/16119	8.87067e-05	0.0131445	0.0117701	GLIPR2/SOX9/WWTR1/EFNA1/FRZB/CITED2/FLNA/GREM1/EPCAM/TGFB1I1/EFNB1/SEMA3C/LTBP3/LDB1/OVOL2/GATA6/KLF10/HES1/ZNF358/FOXF2/SKI/ADAM15/FZD7/PDX1/TGFBR1/RTN4/PPP2CA/HNF1B/KLF4/SRF/ACVR1/LEO1/BMP2/FOXA1/YAP1/KITLG/CDK6	37
turquoise.GO:0006984	GO:0006984	ER-nucleus signaling pathway	17/994	98/16119	9.39655e-05	0.0132446	0.0118597	ADD1/GFPT1/HSPA5/VCP/TLN1/CCDC47/WFS1/KDELR3/CALR/ACADVL/VIMP/DNAJB11/CREB3/SRPRB/ATP2A2/SERP1/DDIT3	17
turquoise.GO:0090002	GO:0090002	establishment of protein localization to plasma membrane	17/994	98/16119	9.39655e-05	0.0132446	0.0118597	CLIP3/SORBS1/ARHGEF16/CDH1/VAMP7/GAS6/ITGB1/MYADM/AMN/CIB1/TESC/TMEM59/TMED2/RER1/KRT18/TSPAN15/PRKCI	17
turquoise.GO:0006006	GO:0006006	glucose metabolic process	29/994	221/16119	9.65831e-05	0.0132894	0.0118998	GYG1/PRKACA/PFKFB2/SORBS1/CRYAB/GFPT1/PRKACB/IRS1/RPIA/PDK4/ENO2/GOT1/PDX1/HK2/VIMP/GALM/G6PD/PCK2/PDHA1/AKR1A1/PKM/PGK1/FBP1/MDH2/GPD2/PFKP/TALDO1/SERP1/PPP1CB	29
turquoise.GO:0070830	GO:0070830	tight junction assembly	11/994	47/16119	0.000103587	0.0135878	0.012167	F11R/PRKACA/CDH1/GJA1/ITGB1/CRB3/PARD6B/SRF/CLDN18/MYO1C/PRKCI	11
turquoise.GO:0043297	GO:0043297	apical junction assembly	12/994	55/16119	0.000105151	0.0135878	0.012167	F11R/PRKACA/VCL/CDH1/GJA1/ITGB1/CRB3/PARD6B/SRF/CLDN18/MYO1C/PRKCI	12
turquoise.GO:0006684	GO:0006684	sphingomyelin metabolic process	6/994	14/16119	0.000105893	0.0135878	0.012167	SMPDL3B/SGMS2/PRKCD/SMPD3/SPTLC2/SMPDL3A	6
turquoise.GO:0006576	GO:0006576	cellular biogenic amine metabolic process	20/994	128/16119	0.000108157	0.0135878	0.012167	SLC44A3/SLC44A4/CDS1/SMPDL3B/CHDH/SGMS2/LDLR/PRKCD/GOT1/ENOPH1/SMPD3/SLC44A1/LPCAT3/DDC/LPCAT4/AGMAT/PLBD1/SAT1/SPTLC2/SMPDL3A	20
turquoise.GO:0048193	GO:0048193	Golgi vesicle transport	28/994	212/16119	0.000113051	0.0139005	0.012447	SCAMP2/VAMP2/AP1M2/COPG1/DNM2/VAMP7/VCP/SEC23A/ARF1/GOLGA5/CYTH3/BCAP31/TMED10/SCAMP3/AMN/RAB1A/CLTA/COPB2/TMED2/KIF1C/RER1/CLINT1/KRT18/STX5/VAMP8/SH3D19/PRKCI/COPZ1	28
turquoise.GO:0010035	GO:0010035	response to inorganic substance	42/994	373/16119	0.00011594	0.0139587	0.0124992	AXL/CLIC4/TXNIP/ENTPD6/GSN/PLN/MEF2A/ACO1/ATP2B4/AOC1/PRNP/CAV1/CRYAB/PDCD6/CDH1/SOD3/SELM/ITPR3/AQP1/ATP13A2/RHOB/PPARG/ZNF580/PAM/CALR/NQO1/PDX1/KRT8/AKR1C3/TFF1/CA2/ADAM9/KLF4/DUOX2/CDK4/SLC25A24/MAOB/FBP1/PRDX1/SLC25A23/PPIF/SDC1	42
turquoise.GO:0044724	GO:0044724	single-organism carbohydrate catabolic process	21/994	139/16119	0.000120499	0.0142115	0.0127255	GALE/GYG1/PFKFB2/RPIA/FUT2/ENO2/IER3/HK2/G6PD/PDHA1/AKR1A1/HKDC1/FUT4/PKM/PGK1/FBP1/FUT8/GPD2/PFKP/TALDO1/PPP1CB	21
turquoise.GO:0014031	GO:0014031	mesenchymal cell development	21/994	140/16119	0.000133699	0.0154529	0.0138372	GLIPR2/SOX9/WWTR1/EFNA1/CITED2/FLNA/GREM1/TGFB1I1/EFNB1/SEMA3C/OVOL2/HES1/FOXF2/ADAM15/TGFBR1/RTN4/PPP2CA/ACVR1/BMP2/FOXA1/KITLG	21
turquoise.GO:0034109	GO:0034109	homotypic cell-cell adhesion	14/994	74/16119	0.000147973	0.0164326	0.0147144	PIP5K1C/FLNA/VCL/CSRP1/MYL9/TLN1/LGALS1/CEACAM5/RAP2B/GAS6/ACTB/CXADR/PRKCD/LYN	14
turquoise.GO:0007043	GO:0007043	cell-cell junction assembly	15/994	83/16119	0.000148821	0.0164326	0.0147144	F11R/PRKACA/UGT8/VCL/CDH1/TLN1/GJA1/ITGB1/CRB3/PARD6B/SRF/PKP4/CLDN18/MYO1C/PRKCI	15
turquoise.GO:0010038	GO:0010038	response to metal ion	31/994	249/16119	0.000150706	0.0164326	0.0147144	CLIC4/TXNIP/ENTPD6/GSN/PLN/MEF2A/ACO1/AOC1/PRNP/CAV1/PDCD6/CDH1/SOD3/ITPR3/AQP1/ATP13A2/PPARG/PAM/CALR/PDX1/AKR1C3/TFF1/CA2/ADAM9/CDK4/SLC25A24/MAOB/FBP1/SLC25A23/PPIF/SDC1	31
turquoise.GO:1902591	GO:1902591	single-organism membrane budding	9/994	34/16119	0.000160405	0.0170371	0.0152557	COPG1/SEC23A/ARF1/TMED10/RAB1A/COPB2/TMED2/PRKCI/COPZ1	9
turquoise.GO:0001667	GO:0001667	ameboidal cell migration	31/994	250/16119	0.000162146	0.0170371	0.0152557	GLIPR2/SOX9/PRSS3/EFNA1/AMOTL1/GREM1/TNS1/ZFAND5/EFNB1/PDCD6/SEMA3C/DPP4/AQP1/ITGB1/NR2F2/OVOL2/ZNF580/TGFBR1/S100P/CIB1/FERMT1/ANXA3/ADAM9/KLF4/SRF/ACVR1/CORO1B/CENPV/ITGA2/KITLG/HBEGF	31
turquoise.GO:0006983	GO:0006983	ER overload response	5/994	10/16119	0.00017135	0.0173725	0.015556	HSPA5/CCDC47/WFS1/VIMP/DDIT3	5
turquoise.GO:0035437	GO:0035437	maintenance of protein localization in endoplasmic reticulum	5/994	10/16119	0.00017135	0.0173725	0.015556	HSPA5/KDELR3/PDIA3/KDELR2/OS9	5
turquoise.GO:0048762	GO:0048762	mesenchymal cell differentiation	22/994	153/16119	0.000175591	0.0174955	0.0156661	GLIPR2/SOX9/WWTR1/EFNA1/FRZB/CITED2/FLNA/GREM1/TGFB1I1/EFNB1/SEMA3C/OVOL2/HES1/FOXF2/ADAM15/TGFBR1/RTN4/PPP2CA/ACVR1/BMP2/FOXA1/KITLG	22
turquoise.GO:0030149	GO:0030149	sphingolipid catabolic process	7/994	21/16119	0.000179565	0.0175883	0.0157492	GBA2/SMPDL3B/GALC/PRKCD/SMPD3/GLA/SMPDL3A	7
turquoise.GO:0031589	GO:0031589	cell-substrate adhesion	33/994	275/16119	0.00018899	0.0179816	0.0161014	EFNA1/AXL/PARVA/UTRN/SORBS1/VCL/FOXF1/SGCE/LGALS1/BCL6/SMOC2/CASK/DAPK3/ACTN1/ITGA6/GAS6/ITGB1/ITGA5/MYADM/ADAM15/CALR/FZD7/ZYX/NID1/CIB1/RAB1A/LAMC1/ADAM9/SPOCK1/SRF/RAC1/ITGA2/CDK6	33
turquoise.GO:0006790	GO:0006790	sulfur compound metabolic process	37/994	322/16119	0.00019325	0.0179816	0.0161014	PRELP/PNKD/B3GNT3/GGT6/B4GALT1/IDH1/STAT5B/ACSS2/B3GNT7/SDC3/TST/GGT1/MICAL2/HSPG2/PDK4/GOT1/CSPG4/ENOPH1/ELOVL5/BPNT1/SUCLG1/ACSL5/GPC4/G6PD/SDC2/B3GNT2/PDHA1/SLC35D2/HSD17B4/CHST15/SLC35B3/SUCLG2/GSR/MCCC2/SDC1/CNDP2/MGST1	37
turquoise.GO:0006685	GO:0006685	sphingomyelin catabolic process	4/994	6/16119	0.000195027	0.0179816	0.0161014	SMPDL3B/PRKCD/SMPD3/SMPDL3A	4
turquoise.GO:0042439	GO:0042439	ethanolamine-containing compound metabolic process	15/994	85/16119	0.000196027	0.0179816	0.0161014	SLC44A3/SLC44A4/CDS1/SMPDL3B/CHDH/SGMS2/LDLR/PRKCD/SMPD3/SLC44A1/LPCAT3/LPCAT4/PLBD1/SPTLC2/SMPDL3A	15
turquoise.GO:0051648	GO:0051648	vesicle localization	23/994	165/16119	0.000202322	0.0182691	0.0163588	RAP1A/PIP5K1C/VAMP2/AP1M2/UNC13B/COPG1/FYCO1/DNM2/MLPH/SEC23A/FNBP1L/ARF1/CACFD1/MYO1A/DCTN2/TMED10/DPYSL2/RAB1A/COPB2/TMED2/DDC/STX5/COPZ1	23
turquoise.GO:0030004	GO:0030004	cellular monovalent inorganic cation homeostasis	11/994	51/16119	0.000225846	0.0197752	0.0177075	CLIC4/ATP1A1/ATP1B1/SLC9A1/TMPRSS3/CLCN3/CHP1/CA2/RAB7A/TMEM165/ATP1B3	11
turquoise.GO:0070527	GO:0070527	platelet aggregation	11/994	51/16119	0.000225846	0.0197752	0.0177075	PIP5K1C/FLNA/VCL/CSRP1/MYL9/TLN1/RAP2B/GAS6/ACTB/PRKCD/LYN	11
turquoise.GO:0001704	GO:0001704	formation of primary germ layer	18/994	115/16119	0.000229704	0.0198128	0.0177412	PRKACA/FOXF1/TWSG1/ITGB1/ITGA5/GATA6/TRIM15/MMP15/FZD7/HNF1B/KLF4/SRF/ACVR1/DUSP4/WLS/LEO1/TXNRD1/ITGA2	18
turquoise.GO:0030968	GO:0030968	endoplasmic reticulum unfolded protein response	15/994	87/16119	0.000255669	0.0217281	0.0194562	ADD1/GFPT1/HSPA5/VCP/TLN1/WFS1/KDELR3/CALR/ACADVL/VIMP/DNAJB11/CREB3/SRPRB/SERP1/DDIT3	15
turquoise.GO:0016052	GO:0016052	carbohydrate catabolic process	21/994	147/16119	0.000267625	0.0223475	0.0200108	GALE/GYG1/PFKFB2/RPIA/FUT2/ENO2/IER3/HK2/G6PD/PDHA1/AKR1A1/HKDC1/FUT4/PKM/PGK1/FBP1/FUT8/GPD2/PFKP/TALDO1/PPP1CB	21
turquoise.GO:0046164	GO:0046164	alcohol catabolic process	11/994	52/16119	0.000270691	0.0223475	0.0200108	SMPDL3B/ADH5/IMPA2/LDLR/PRKCD/ALDH1B1/AKR1C3/SMPD3/SRD5A3/GPD2/SMPDL3A	11
turquoise.GO:0006665	GO:0006665	sphingolipid metabolic process	19/994	127/16119	0.000283786	0.0230329	0.0206245	GBA2/SERINC1/UGT8/FA2H/SERINC2/ARSD/SERINC5/SMPDL3B/GALC/PPAP2C/SGMS2/SGPP2/PRKCD/DEGS2/PPP2CA/SMPD3/GLA/SPTLC2/SMPDL3A	19
turquoise.GO:0031668	GO:0031668	cellular response to extracellular stimulus	23/994	169/16119	0.00028887	0.0230329	0.0206245	AXL/AOC1/CAV1/HSPA5/TNC/ULK3/TP53INP2/ITGA6/GAS6/ITGB1/DAP/FOXA3/KLF10/PDK4/NCOA1/VDR/RAB1A/AKR1C3/KIAA1324/SRF/VAMP8/LYN/MAP1LC3A	23
turquoise.GO:0034620	GO:0034620	cellular response to unfolded protein	15/994	88/16119	0.00029095	0.0230329	0.0206245	ADD1/GFPT1/HSPA5/VCP/TLN1/WFS1/KDELR3/CALR/ACADVL/VIMP/DNAJB11/CREB3/SRPRB/SERP1/DDIT3	15
turquoise.GO:0060056	GO:0060056	mammary gland involution	5/994	11/16119	0.000298197	0.0232876	0.0208526	ELF3/FRZB/B4GALT1/CAV1/VDR	5
turquoise.GO:0090130	GO:0090130	tissue migration	24/994	181/16119	0.00031978	0.0243349	0.0217904	GLIPR2/SOX9/PRSS3/EFNA1/AMOTL1/GREM1/FOXF1/PDCD6/DPP4/AQP1/ITGB1/NR2F2/ZNF580/TGFBR1/S100P/CIB1/FERMT1/ANXA3/ADAM9/KLF4/SRF/CORO1B/ITGA2/HBEGF	24
turquoise.GO:0006575	GO:0006575	cellular modified amino acid metabolic process	26/994	203/16119	0.00032003	0.0243349	0.0217904	SERINC1/PNKD/GGT6/ATP2B4/IDH1/STAT5B/SERINC2/SERINC5/CPQ/CHDH/GGT1/P4HB/ALDH18A1/DDAH1/VNN1/G6PD/DUOX2/LPCAT3/SEPHS2/PRDX4/LPCAT4/CKB/GSR/PPCS/CNDP2/MGST1	26
turquoise.GO:0060537	GO:0060537	muscle tissue development	37/994	331/16119	0.000333659	0.0250418	0.0224234	MBNL1/SOX9/MYL6/CITED2/TSC22D3/GREM1/PLN/SVIL/MEF2A/MYLK/ZFAND5/NEXN/MYH11/TPM1/CAV1/KLF5/SEMA3C/SGCB/BTG2/GJA1/MYH14/SLC9A1/ITGB1/NR2F2/HSPG2/GATA6/ZFPM1/CXADR/SKI/CALR/MEF2D/KIAA1161/SRF/ACVR1/BMP2/NRAS/DDIT3	37
turquoise.GO:0046466	GO:0046466	membrane lipid catabolic process	7/994	23/16119	0.000339592	0.0251602	0.0225294	GBA2/SMPDL3B/GALC/PRKCD/SMPD3/GLA/SMPDL3A	7
turquoise.GO:0048864	GO:0048864	stem cell development	30/994	250/16119	0.000363157	0.0265656	0.0237879	GLIPR2/SOX9/WWTR1/EFNA1/CITED2/FLNA/GREM1/TGFB1I1/EFNB1/SEMA3C/LDB1/OVOL2/KLF10/HES1/ZNF358/FOXF2/SKI/ADAM15/FZD7/TGFBR1/RTN4/PPP2CA/HNF1B/KLF4/ACVR1/LEO1/BMP2/FOXA1/YAP1/KITLG	30
turquoise.GO:1902305	GO:1902305	regulation of sodium ion transmembrane transport	9/994	38/16119	0.000399003	0.028823	0.0258092	STOM/UTRN/ATP2B4/ATP1B1/SLC9A3R1/CHP1/TESC/SNTA1/ATP1B3	9
turquoise.GO:0033627	GO:0033627	cell adhesion mediated by integrin	10/994	46/16119	0.000404378	0.0288506	0.025834	EFNA1/DPP4/ITGA6/ITGB1/ITGA5/CIB1/TESC/ADAM9/ITGA2/LYN	10
turquoise.GO:0006002	GO:0006002	fructose 6-phosphate metabolic process	4/994	7/16119	0.000432794	0.0297752	0.0266618	GFPT1/FBP1/PFKP/TALDO1	4
turquoise.GO:0030033	GO:0030033	microvillus assembly	4/994	7/16119	0.000432794	0.0297752	0.0266618	KLF5/RDX/SLC9A3R1/MYO1A	4
turquoise.GO:0046477	GO:0046477	glycosylceramide catabolic process	4/994	7/16119	0.000432794	0.0297752	0.0266618	GBA2/GALC/PRKCD/GLA	4
turquoise.GO:0006987	GO:0006987	activation of signaling protein activity involved in unfolded protein response	12/994	64/16119	0.000471725	0.0318576	0.0285265	ADD1/GFPT1/HSPA5/TLN1/WFS1/KDELR3/CALR/ACADVL/DNAJB11/SRPRB/SERP1/DDIT3	12
turquoise.GO:0001837	GO:0001837	epithelial to mesenchymal transition	15/994	92/16119	0.000477193	0.0318576	0.0285265	GLIPR2/SOX9/WWTR1/EFNA1/FLNA/GREM1/TGFB1I1/OVOL2/FOXF2/ADAM15/TGFBR1/RTN4/PPP2CA/BMP2/FOXA1	15
turquoise.GO:0002064	GO:0002064	epithelial cell development	24/994	186/16119	0.000479601	0.0318576	0.0285265	SOX9/RAP1A/CLIC4/KDF1/ACTA2/B4GALT1/KLF5/CDH1/SHROOM3/RDX/GJA1/MYADM/FZD7/FEM1B/F2RL1/HSD17B4/LAMB2/SPDEF/EZR/RAC1/FOXA1/VEZF1/CDK6/SDC1	24
turquoise.GO:0007015	GO:0007015	actin filament organization	31/994	266/16119	0.000486107	0.0318872	0.028553	GSN/PDLIM3/DPYSL3/FLNA/MYLK/SORBS1/ADD1/TPM1/USH1C/ARF1/RDX/VILL/DSTN/ACTN1/WASF2/MICAL2/MYADM/PRKCD/ZYX/ANG/F2RL1/ARPC5/SRF/EZR/DIAPH1/RAC1/CAPZA1/ENAH/CORO1B/LIMA1/PRKCI	31
turquoise.GO:0016050	GO:0016050	vesicle organization	20/994	143/16119	0.000491082	0.0318872	0.028553	COPG1/CAV1/VAMP7/NBEAL2/SEC23A/AQP1/FNBP1L/ARF1/TMED10/TSG101/CD2AP/RAB1A/COPB2/TMED2/RAB7A/CLINT1/STX5/VAMP8/PRKCI/COPZ1	20
turquoise.GO:0010631	GO:0010631	epithelial cell migration	23/994	176/16119	0.000520277	0.0327295	0.0293073	GLIPR2/SOX9/PRSS3/EFNA1/AMOTL1/GREM1/PDCD6/DPP4/AQP1/ITGB1/NR2F2/ZNF580/TGFBR1/S100P/CIB1/FERMT1/ANXA3/ADAM9/KLF4/SRF/CORO1B/ITGA2/HBEGF	23
turquoise.GO:0090132	GO:0090132	epithelium migration	23/994	176/16119	0.000520277	0.0327295	0.0293073	GLIPR2/SOX9/PRSS3/EFNA1/AMOTL1/GREM1/PDCD6/DPP4/AQP1/ITGB1/NR2F2/ZNF580/TGFBR1/S100P/CIB1/FERMT1/ANXA3/ADAM9/KLF4/SRF/CORO1B/ITGA2/HBEGF	23
turquoise.GO:0072234	GO:0072234	metanephric nephron tubule development	6/994	18/16119	0.000528751	0.0327295	0.0293073	SOX9/WWTR1/AQP1/HES1/LGR4/YAP1	6
turquoise.GO:0072243	GO:0072243	metanephric nephron epithelium development	6/994	18/16119	0.000528751	0.0327295	0.0293073	SOX9/WWTR1/AQP1/HES1/LGR4/YAP1	6
turquoise.GO:0016266	GO:0016266	O-glycan processing	11/994	56/16119	0.000532371	0.0327295	0.0293073	B3GNT3/GALNT3/MUC13/B3GNT7/C1GALT1/GALNT5/MUC1/GCNT3/B3GNT2/GCNT1/C1GALT1C1	11
turquoise.GO:0051650	GO:0051650	establishment of vesicle localization	21/994	155/16119	0.00055344	0.0333181	0.0298343	RAP1A/PIP5K1C/VAMP2/AP1M2/UNC13B/COPG1/FYCO1/DNM2/SEC23A/FNBP1L/ARF1/CACFD1/DCTN2/TMED10/DPYSL2/RAB1A/COPB2/TMED2/DDC/STX5/COPZ1	21
turquoise.GO:0006898	GO:0006898	receptor-mediated endocytosis	25/994	199/16119	0.000553476	0.0333181	0.0298343	PIP5K1C/GREM1/PDLIM7/CAV1/DNM2/GAK/TMPRSS2/FNBP1L/ARF1/SCARA3/TMPRSS3/LDLR/MICALL1/M6PR/TMPRSS4/DMBT1/AMN/CD2AP/LGALS3BP/RAMP1/EZR/CXCL16/RAC1/HIP1R/SNX9	25
turquoise.GO:1901615	GO:1901615	organic hydroxy compound metabolic process	49/994	490/16119	0.000567524	0.0338116	0.0302762	SLC44A3/SLC44A4/PNKD/SQLE/EBP/PFKFB2/NSDHL/ACSS2/CDS1/SMPDL3B/CPQ/DHCR24/ADH5/CHDH/IMPA2/SGMS2/CYB5R3/SGPP2/LDLR/PRKCD/GOT1/DEGS2/RETSAT/ALDH1B1/ACADVL/PNPO/DPAGT1/VDR/SPR/PLCB3/ITPKA/AKR1C3/DKK3/G6PD/PDXK/SMPD3/SLC44A1/DUOX2/LPCAT3/DDC/HPRT1/MAOB/LPCAT4/BMP2/SRD5A3/PLBD1/GPD2/SPTLC2/SMPDL3A	49
turquoise.GO:0090004	GO:0090004	positive regulation of establishment of protein localization to plasma membrane	7/994	25/16119	0.000597419	0.0345282	0.0309179	CLIP3/SORBS1/ARHGEF16/ITGB1/CIB1/RER1/PRKCI	7
turquoise.GO:0006903	GO:0006903	vesicle targeting	9/994	40/16119	0.000598924	0.0345282	0.0309179	AP1M2/COPG1/SEC23A/ARF1/TMED10/COPB2/TMED2/STX5/COPZ1	9
turquoise.GO:0046365	GO:0046365	monosaccharide catabolic process	9/994	40/16119	0.000598924	0.0345282	0.0309179	GALE/PFKFB2/RPIA/FUT2/G6PD/AKR1A1/FUT4/FUT8/TALDO1	9
turquoise.GO:0035967	GO:0035967	cellular response to topologically incorrect protein	15/994	94/16119	0.000603452	0.0345282	0.0309179	ADD1/GFPT1/HSPA5/VCP/TLN1/WFS1/KDELR3/CALR/ACADVL/VIMP/DNAJB11/CREB3/SRPRB/SERP1/DDIT3	15
turquoise.GO:0032075	GO:0032075	positive regulation of nuclease activity	12/994	66/16119	0.00063124	0.0355992	0.0318769	ADD1/GFPT1/HSPA5/TLN1/WFS1/KDELR3/CALR/ACADVL/DNAJB11/SRPRB/SERP1/DDIT3	12
turquoise.GO:0014706	GO:0014706	striated muscle tissue development	35/994	318/16119	0.00063449	0.0355992	0.0318769	MBNL1/SOX9/MYL6/CITED2/TSC22D3/GREM1/PLN/SVIL/MEF2A/NEXN/MYH11/TPM1/CAV1/KLF5/SEMA3C/SGCB/BTG2/GJA1/MYH14/SLC9A1/ITGB1/NR2F2/HSPG2/GATA6/ZFPM1/CXADR/SKI/CALR/MEF2D/KIAA1161/SRF/ACVR1/BMP2/NRAS/DDIT3	35
turquoise.GO:0031669	GO:0031669	cellular response to nutrient levels	20/994	146/16119	0.000643608	0.0357636	0.0320241	AOC1/CAV1/HSPA5/TNC/ULK3/TP53INP2/GAS6/ITGB1/DAP/FOXA3/KLF10/PDK4/NCOA1/VDR/RAB1A/AKR1C3/KIAA1324/SRF/VAMP8/MAP1LC3A	20
turquoise.GO:0006873	GO:0006873	cellular ion homeostasis	45/994	443/16119	0.000676296	0.0371428	0.0332591	CLIC4/PRKACA/PLN/ACO1/ATP2B4/ATP1A1/ABL1/PRNP/CAV1/ATP1B1/LPAR2/ITPR3/ARF1/GJA1/SLC9A1/TMPRSS3/WFS1/ITGB1/SLC9A3R1/STEAP3/BCAP31/CLCN3/NPTN/CALR/STOML2/ATP6V0B/VDR/CHP1/SLC39A14/MCU/F2RL1/CA2/ATP2C1/ATP2A2/DIAPH1/RAB7A/MICU1/CD55/CKB/LYN/DDIT3/TCIRG1/SLC25A23/TMEM165/ATP1B3	45
turquoise.GO:0006937	GO:0006937	regulation of muscle contraction	19/994	136/16119	0.000681283	0.0371428	0.0332591	GUCY1A3/RGS2/MRVI1/PRKACA/PLN/HSPB6/ATP1A1/TPM1/MYL9/ANXA6/CAV1/ATP1B1/CNN1/KCNQ1/DAPK3/GJA1/SRF/ITGA2/SNTA1	19
turquoise.GO:1902532	GO:1902532	negative regulation of intracellular signal transduction	36/994	332/16119	0.000704573	0.0380535	0.0340746	RGS2/ATP2B4/HIPK3/PRNP/CAV1/PDCD6/DUSP3/IVNS1ABP/BCL6/WFS1/SLC9A3R1/PHLDA3/MYADM/PRKCD/WWC3/MUC1/PRKCDBP/TAF9B/PDX1/CLU/ZMYND11/RASAL1/CIB1/CHP1/VIMP/VNN1/PPP2CA/F2RL1/RNF149/KLF4/DUSP4/DNAJA1/FBP1/LYN/MECOM/PPIF	36
turquoise.GO:0090257	GO:0090257	regulation of muscle system process	22/994	169/16119	0.000718238	0.0384324	0.0344138	GUCY1A3/RGS2/MRVI1/PRKACA/PLN/HSPB6/FBXO32/ATP2B4/ATP1A1/TPM1/MYL9/ANXA6/CAV1/ATP1B1/CNN1/KCNQ1/DAPK3/GJA1/KLF4/SRF/ITGA2/SNTA1	22
turquoise.GO:0010669	GO:0010669	epithelial structure maintenance	6/994	19/16119	0.000732745	0.0388489	0.0347868	SOX9/MUC13/LDB1/CXADR/TFF1/SRF	6
turquoise.GO:0046165	GO:0046165	alcohol biosynthetic process	19/994	137/16119	0.000746333	0.0389794	0.0349037	SLC44A3/SLC44A4/SQLE/EBP/NSDHL/CDS1/DHCR24/IMPA2/SGMS2/CYB5R3/GOT1/DPAGT1/VDR/AKR1C3/DKK3/G6PD/SLC44A1/BMP2/SPTLC2	19
turquoise.GO:0034349	GO:0034349	glial cell apoptotic process	5/994	13/16119	0.000748697	0.0389794	0.0349037	CASP3/GAS6/PRKCD/TNFRSF21/PRKCI	5
turquoise.GO:0006890	GO:0006890	retrograde vesicle-mediated transport, Golgi to ER	7/994	26/16119	0.000774429	0.0399592	0.035781	COPG1/ARF1/TMED10/COPB2/KIF1C/RER1/COPZ1	7
turquoise.GO:0010959	GO:0010959	regulation of metal ion transport	28/994	239/16119	0.000821292	0.0420022	0.0376104	STOM/UTRN/FHL1/PRKACA/PLN/MYLK/ATP2B4/PRSS8/ATP1A1/AHNAK/PRNP/CAV1/ATP1B1/LGALS3/KCNQ1/CASK/GJA1/WFS1/SLC9A3R1/CRACR2B/KCNE3/CHP1/TESC/CREB3/DIAPH1/LYN/SNTA1/ATP1B3	28
turquoise.GO:0002028	GO:0002028	regulation of sodium ion transport	11/994	59/16119	0.000844976	0.0426123	0.0381567	STOM/UTRN/ATP2B4/PRSS8/ATP1A1/ATP1B1/SLC9A3R1/CHP1/TESC/SNTA1/ATP1B3	11
turquoise.GO:0006066	GO:0006066	alcohol metabolic process	39/994	373/16119	0.000874082	0.0426123	0.0381567	SLC44A3/SLC44A4/SQLE/EBP/NSDHL/ACSS2/CDS1/SMPDL3B/DHCR24/ADH5/CHDH/IMPA2/SGMS2/CYB5R3/SGPP2/LDLR/PRKCD/GOT1/DEGS2/RETSAT/ALDH1B1/ACADVL/DPAGT1/VDR/PLCB3/ITPKA/AKR1C3/DKK3/G6PD/SMPD3/SLC44A1/LPCAT3/LPCAT4/BMP2/SRD5A3/PLBD1/GPD2/SPTLC2/SMPDL3A	39
turquoise.GO:0030042	GO:0030042	actin filament depolymerization	9/994	42/16119	0.00087411	0.0426123	0.0381567	GSN/ADD1/RDX/VILL/DSTN/MICAL2/F2RL1/CAPZA1/LIMA1	9
turquoise.GO:0035329	GO:0035329	hippo signaling	8/994	34/16119	0.000875271	0.0426123	0.0381567	WWTR1/AMOTL1/TEAD1/CASP3/WWC3/AMOTL2/TEAD3/YAP1	8
turquoise.GO:0003104	GO:0003104	positive regulation of glomerular filtration	3/994	4/16119	0.000892212	0.0426123	0.0381567	GJA1/GAS6/F2RL1	3
turquoise.GO:0032286	GO:0032286	central nervous system myelin maintenance	3/994	4/16119	0.000892212	0.0426123	0.0381567	FA2H/MYRF/CLU	3
turquoise.GO:0046984	GO:0046984	regulation of hemoglobin biosynthetic process	3/994	4/16119	0.000892212	0.0426123	0.0381567	EIF2AK1/LDB1/KLF4	3
turquoise.GO:0070885	GO:0070885	negative regulation of calcineurin-NFAT signaling cascade	3/994	4/16119	0.000892212	0.0426123	0.0381567	ATP2B4/PRNP/CHP1	3
turquoise.GO:0007369	GO:0007369	gastrulation	22/994	172/16119	0.000911132	0.0428084	0.0383323	PRKACA/FOXF1/TWSG1/TGIF1/ITGB1/LDB1/ITGA5/MYADM/GATA6/TRIM15/MMP15/FZD7/HNF1B/KLF4/SRF/ACVR1/DUSP4/WLS/LEO1/TXNRD1/ITGA2/UGDH	22
turquoise.GO:0034599	GO:0034599	cellular response to oxidative stress	22/994	172/16119	0.000911132	0.0428084	0.0383323	AXL/ABL1/TPM1/CASP3/SOD3/AQP1/RHOB/P4HB/ZNF580/PRKCD/NQO1/ZNF622/VIMP/AKR1C3/VNN1/G6PD/KLF4/DUOX2/SLC25A24/PRDX1/PPIF/MGST1	22
turquoise.GO:0016051	GO:0016051	carbohydrate biosynthetic process	24/994	195/16119	0.000947686	0.0441668	0.0395486	GYG1/PRKACA/SORBS1/B4GALT1/GFPT1/PRKACB/IRS1/IMPA2/ENO2/GOT1/VIMP/G6PD/PCK2/AKR1A1/NANS/ST6GALNAC1/CHST15/PGK1/FBP1/FUT8/MDH2/GPD2/TALDO1/PPP1CB	24
turquoise.GO:0048514	GO:0048514	blood vessel morphogenesis	46/994	465/16119	0.00103577	0.0477017	0.0427139	RAP1A/EFNA1/PARVA/CLIC4/CITED2/GREM1/MYLK/B4GALT1/ADD1/CAV1/FOXF1/KLF5/PDCD6/MCAM/ZFP36L1/AQP1/RHOB/GJA1/C1GALT1/ITGB1/NR2F2/ITGA5/HSPG2/OVOL2/GATA6/RRAS/HES1/DDAH1/CSPG4/ADAM15/TGFBR1/ANG/CEACAM1/RTN4/CIB1/HTATIP2/ANXA3/PDCD10/RAMP1/KLF4/LRG1/SRF/ACVR1/SAT1/YAP1/VEZF1	46
turquoise.GO:0033674	GO:0033674	positive regulation of kinase activity	47/994	478/16119	0.00104317	0.0477017	0.0427139	RAP1A/EFNA1/TRAF4/CD81/GREM1/PRKACA/PFKFB2/ATP2B4/ADD1/GFPT1/PRKACB/HSPA5/LPAR2/TLN1/GADD45B/MARK2/CARD10/MST1R/IRS1/WFS1/GAS6/KDELR3/CSPG4/CALR/CLU/TGFBR1/ACADVL/ANG/ZNF622/CIB1/DNAJB11/IRAK2/TNFRSF10B/PPP2CA/PDCD10/SRPRB/JTB/ADAM9/RAC1/CCND2/BMP2/LYN/KITLG/NRAS/SERP1/DDIT3/TNFRSF10A	47
turquoise.GO:0046364	GO:0046364	monosaccharide biosynthetic process	14/994	89/16119	0.0010483	0.0477017	0.0427139	PRKACA/PRKACB/ENO2/GOT1/VIMP/G6PD/PCK2/AKR1A1/CHST15/PGK1/FBP1/MDH2/GPD2/TALDO1	14
turquoise.GO:0019320	GO:0019320	hexose catabolic process	8/994	35/16119	0.0010741	0.0477357	0.0427444	GALE/PFKFB2/RPIA/FUT2/G6PD/FUT4/FUT8/TALDO1	8
turquoise.GO:0044242	GO:0044242	cellular lipid catabolic process	20/994	152/16119	0.0010746	0.0477357	0.0427444	FAAH/GBA2/PRKACA/PRKACB/SMPDL3B/GALC/IRS1/LDLR/ABCD3/PRKCD/ACADVL/AKR1C3/SMPD3/CPT2/PNPLA2/HSD17B4/SRD5A3/GLA/SMPDL3A/PPP1CB	20
turquoise.GO:0051272	GO:0051272	positive regulation of cellular component movement	32/994	291/16119	0.00107762	0.0477357	0.0427444	GLIPR2/SOX9/AMOTL1/MYLK/STAT5B/FOXF1/PDCD6/HSPA5/LGALS3/BCL6/AQP1/IRS1/GAS6/ITGB1/ITGA5/MYADM/ZNF580/CALR/TGFBR1/CIB1/CREB3/ANXA3/F2RL1/ADAM9/DIAPH1/CXCL16/BMP2/MYO1C/ITGA2/LYN/TNFRSF14/HBEGF	32
turquoise.GO:0002009	GO:0002009	morphogenesis of an epithelium	42/994	415/16119	0.00108209	0.0477357	0.0427444	SOX9/CLIC4/FRZB/KDF1/CITED2/PRKACA/B4GALT1/VCL/TGFB1I1/FOXF1/SEMA3C/CDH1/PRKACB/SHROOM3/SPINT1/TNC/GJA1/TGIF1/CA9/MICAL2/ITGA5/OVOL2/HES1/FOXF2/SKI/PDX1/FEM1B/VDR/HNF1B/CA2/IRX2/BCL10/SRF/ACVR1/RAC1/BMP2/ENAH/FOXA1/LGR4/YAP1/NRAS/HBEGF	42
turquoise.GO:0035886	GO:0035886	vascular smooth muscle cell differentiation	5/994	14/16119	0.00110581	0.0484127	0.0433506	SGCB/GATA6/HES1/SMARCA2/SRF	5
turquoise.GO:0042326	GO:0042326	negative regulation of phosphorylation	33/994	304/16119	0.00113155	0.0491671	0.0440261	WWTR1/RGS2/FAM129A/GREM1/ABL1/HIPK3/PRNP/CAV1/PKIG/DUSP3/CASP3/GADD45B/TRIB1/ERRFI1/SLC9A3R1/NR2F2/MYADM/PRKCD/ZMYND11/CIB1/CHP1/HEXIM1/TESC/PPP2CA/F2RL1/RNF149/MLLT1/KLF4/DUSP4/DNAJA1/LYN/MECOM/PPIF	33
yellow.GO:0022904	GO:0022904	respiratory electron transport chain	36/288	105/16119	7.38412e-37	2.18792e-33	2.01703e-33	COX5B/NDUFB5/PARK7/COX5A/NDUFS6/ATP5L/ATP5J/COX7C/DNAJC15/NDUFA1/ETFB/NDUFA12/SDHD/ATP5G1/UQCR10/NDUFB8/NDUFC1/NDUFA4/ATP5C1/NDUFB1/NDUFS3/UQCRQ/COX8A/ATP5I/ATP5H/NDUFB4/NDUFB2/COX7B/NDUFAB1/COX4I1/NDUFA13/ATP5O/ATP5F1/NDUFB3/COX6A1/SDHB	36
yellow.GO:0022900	GO:0022900	electron transport chain	36/288	107/16119	1.63396e-36	2.42072e-33	2.23165e-33	COX5B/NDUFB5/PARK7/COX5A/NDUFS6/ATP5L/ATP5J/COX7C/DNAJC15/NDUFA1/ETFB/NDUFA12/SDHD/ATP5G1/UQCR10/NDUFB8/NDUFC1/NDUFA4/ATP5C1/NDUFB1/NDUFS3/UQCRQ/COX8A/ATP5I/ATP5H/NDUFB4/NDUFB2/COX7B/NDUFAB1/COX4I1/NDUFA13/ATP5O/ATP5F1/NDUFB3/COX6A1/SDHB	36
yellow.GO:0045333	GO:0045333	cellular respiration	38/288	160/16119	4.33362e-32	4.28017e-29	3.94587e-29	COX5B/CAT/NDUFB5/PARK7/COX5A/NDUFS6/ATP5L/ATP5J/COX7C/DNAJC15/NDUFA1/ETFB/NDUFA12/SDHD/ATP5G1/UQCR10/NDUFB8/NDUFC1/NDUFA4/ATP5C1/NDUFB1/NDUFS3/UQCRQ/COX8A/ATP5I/ATP5H/NDUFB4/NDUFB2/COX7B/NDUFAB1/COX4I1/NDUFA13/ATP5O/ATP5F1/NDUFB3/COX6A1/SDHB/BLOC1S1	38
yellow.GO:0015980	GO:0015980	energy derivation by oxidation of organic compounds	40/288	340/16119	1.54417e-21	1.14384e-18	1.05451e-18	COX5B/CAT/NDUFB5/PARK7/COX5A/NDUFS6/ATP5L/ATP5J/GNG5/COX7C/INSR/DNAJC15/NDUFA1/ETFB/NDUFA12/SDHD/ATP5G1/UQCR10/NDUFB8/NDUFC1/NDUFA4/ATP5C1/NDUFB1/NDUFS3/UQCRQ/COX8A/ATP5I/ATP5H/NDUFB4/NDUFB2/COX7B/NDUFAB1/COX4I1/NDUFA13/ATP5O/ATP5F1/NDUFB3/COX6A1/SDHB/BLOC1S1	40
yellow.GO:0006091	GO:0006091	generation of precursor metabolites and energy	44/288	428/16119	2.86417e-21	1.6973e-18	1.56474e-18	COX5B/LDHA/CAT/NDUFB5/PARK7/COX5A/NDUFS6/ATP5L/ATP5J/GNG5/COX7C/INSR/GBAS/DNAJC15/NDUFA1/ETFB/NDUFA12/ATPIF1/SDHD/ATP5G1/UQCR10/NDUFB8/NDUFC1/NDUFA4/ATP5C1/NDUFB1/NDUFS3/UQCRQ/COX8A/ATP5I/ATP5H/NDUFB4/NDUFB2/COX7B/NDUFAB1/COX4I1/NDUFA13/ATP5O/COX17/ATP5F1/NDUFB3/COX6A1/SDHB/BLOC1S1	44
yellow.GO:1902600	GO:1902600	hydrogen ion transmembrane transport	23/288	98/16119	1.15045e-19	5.68132e-17	5.23758e-17	ATP6V1E1/COA6/COX5B/ATP6V0E1/COX5A/ATP5L/ATP5J/ATP5G3/COX7C/ATP5G1/UQCR10/NDUFA4/ATP5C1/UQCRQ/COX8A/ATP5I/ATP5H/COX7B/COX4I1/COX7A2/ATP5O/ATP5F1/COX6A1	23
yellow.GO:0015992	GO:0015992	proton transport	25/288	132/16119	7.50789e-19	3.17798e-16	2.92977e-16	ATP6V1E1/COA6/COX5B/ATP6V0E1/PARK7/COX5A/ATP5L/ATP5J/ATP5G3/COX7C/ATP5G1/UQCR10/SLC2A10/NDUFA4/ATP5C1/UQCRQ/COX8A/ATP5I/ATP5H/COX7B/COX4I1/COX7A2/ATP5O/ATP5F1/COX6A1	25
yellow.GO:0006818	GO:0006818	hydrogen transport	25/288	134/16119	1.10107e-18	4.0781e-16	3.75958e-16	ATP6V1E1/COA6/COX5B/ATP6V0E1/PARK7/COX5A/ATP5L/ATP5J/ATP5G3/COX7C/ATP5G1/UQCR10/SLC2A10/NDUFA4/ATP5C1/UQCRQ/COX8A/ATP5I/ATP5H/COX7B/COX4I1/COX7A2/ATP5O/ATP5F1/COX6A1	25
yellow.GO:0006119	GO:0006119	oxidative phosphorylation	17/288	68/16119	2.38376e-15	7.84785e-13	7.23491e-13	NDUFB5/PARK7/NDUFS6/GBAS/DNAJC15/NDUFA1/UQCR10/NDUFB8/NDUFC1/NDUFA4/ATP5C1/NDUFB1/NDUFS3/NDUFB4/NDUFB2/NDUFAB1/NDUFB3	17
yellow.GO:0006120	GO:0006120	mitochondrial electron transport, NADH to ubiquinone	14/288	42/16119	8.32375e-15	2.46633e-12	2.2737e-12	NDUFB5/PARK7/NDUFS6/DNAJC15/NDUFA1/NDUFB8/NDUFC1/NDUFA4/NDUFB1/NDUFS3/NDUFB4/NDUFB2/NDUFAB1/NDUFB3	14
yellow.GO:0042773	GO:0042773	ATP synthesis coupled electron transport	15/288	53/16119	1.42604e-14	3.52112e-12	3.24611e-12	NDUFB5/PARK7/NDUFS6/DNAJC15/NDUFA1/UQCR10/NDUFB8/NDUFC1/NDUFA4/NDUFB1/NDUFS3/NDUFB4/NDUFB2/NDUFAB1/NDUFB3	15
yellow.GO:0042775	GO:0042775	mitochondrial ATP synthesis coupled electron transport	15/288	53/16119	1.42604e-14	3.52112e-12	3.24611e-12	NDUFB5/PARK7/NDUFS6/DNAJC15/NDUFA1/UQCR10/NDUFB8/NDUFC1/NDUFA4/NDUFB1/NDUFS3/NDUFB4/NDUFB2/NDUFAB1/NDUFB3	15
yellow.GO:0015985	GO:0015985	energy coupled proton transport, down electrochemical gradient	9/288	19/16119	1.29422e-11	2.73912e-09	2.52518e-09	ATP5L/ATP5J/ATP5G3/ATP5G1/ATP5C1/ATP5I/ATP5H/ATP5O/ATP5F1	9
yellow.GO:0015986	GO:0015986	ATP synthesis coupled proton transport	9/288	19/16119	1.29422e-11	2.73912e-09	2.52518e-09	ATP5L/ATP5J/ATP5G3/ATP5G1/ATP5C1/ATP5I/ATP5H/ATP5O/ATP5F1	9
yellow.GO:0042776	GO:0042776	mitochondrial ATP synthesis coupled proton transport	8/288	14/16119	2.57986e-11	5.09608e-09	4.69806e-09	ATP5L/ATP5J/ATP5G1/ATP5C1/ATP5I/ATP5H/ATP5O/ATP5F1	8
yellow.GO:0046034	GO:0046034	ATP metabolic process	30/288	455/16119	7.47684e-10	1.38462e-07	1.27647e-07	GABARAPL2/MYO1D/NDUFB5/PARK7/NDUFS6/ATP5L/ATP5J/ATP5G3/GBAS/DNAJC15/NDUFA1/DYNC1H1/ABCA2/ATP5G1/UQCR10/NDUFB8/NDUFC1/NDUFA4/ATP5C1/NDUFB1/NDUFS3/ABCC1/ATP5I/ATP5H/NDUFB4/NDUFB2/NDUFAB1/ATP5O/ATP5F1/NDUFB3	30
yellow.GO:0009206	GO:0009206	purine ribonucleoside triphosphate biosynthetic process	11/288	50/16119	9.8544e-10	1.71756e-07	1.58342e-07	ATP5L/ATP5J/ATP5G3/GBAS/NME1/ATP5G1/ATP5C1/ATP5I/ATP5H/ATP5O/ATP5F1	11
yellow.GO:0006754	GO:0006754	ATP biosynthetic process	10/288	39/16119	1.14153e-09	1.87909e-07	1.73232e-07	ATP5L/ATP5J/ATP5G3/GBAS/ATP5G1/ATP5C1/ATP5I/ATP5H/ATP5O/ATP5F1	10
yellow.GO:0009145	GO:0009145	purine nucleoside triphosphate biosynthetic process	11/288	51/16119	1.23668e-09	1.92856e-07	1.77794e-07	ATP5L/ATP5J/ATP5G3/GBAS/NME1/ATP5G1/ATP5C1/ATP5I/ATP5H/ATP5O/ATP5F1	11
yellow.GO:0006839	GO:0006839	mitochondrial transport	18/288	171/16119	1.68145e-09	2.49107e-07	2.29651e-07	MTX2/PARL/ATP5L/ATP5J/MPC2/MRPL18/TIMM9/ATPIF1/MPC1/ATP5G1/DYNLL1/ATP5C1/ATP5I/ATP5H/TIMM8B/NDUFA13/ATP5O/ATP5F1	18
yellow.GO:0009167	GO:0009167	purine ribonucleoside monophosphate metabolic process	30/288	479/16119	2.5079e-09	3.53852e-07	3.26215e-07	GABARAPL2/MYO1D/NDUFB5/PARK7/NDUFS6/ATP5L/ATP5J/ATP5G3/GBAS/DNAJC15/NDUFA1/DYNC1H1/ABCA2/ATP5G1/UQCR10/NDUFB8/NDUFC1/NDUFA4/ATP5C1/NDUFB1/NDUFS3/ABCC1/ATP5I/ATP5H/NDUFB4/NDUFB2/NDUFAB1/ATP5O/ATP5F1/NDUFB3	30
yellow.GO:0009126	GO:0009126	purine nucleoside monophosphate metabolic process	30/288	480/16119	2.63284e-09	3.54596e-07	3.26901e-07	GABARAPL2/MYO1D/NDUFB5/PARK7/NDUFS6/ATP5L/ATP5J/ATP5G3/GBAS/DNAJC15/NDUFA1/DYNC1H1/ABCA2/ATP5G1/UQCR10/NDUFB8/NDUFC1/NDUFA4/ATP5C1/NDUFB1/NDUFS3/ABCC1/ATP5I/ATP5H/NDUFB4/NDUFB2/NDUFAB1/ATP5O/ATP5F1/NDUFB3	30
yellow.GO:0009201	GO:0009201	ribonucleoside triphosphate biosynthetic process	11/288	56/16119	3.5719e-09	4.60153e-07	4.24214e-07	ATP5L/ATP5J/ATP5G3/GBAS/NME1/ATP5G1/ATP5C1/ATP5I/ATP5H/ATP5O/ATP5F1	11
yellow.GO:0009161	GO:0009161	ribonucleoside monophosphate metabolic process	30/288	493/16119	4.89234e-09	6.04e-07	5.56826e-07	GABARAPL2/MYO1D/NDUFB5/PARK7/NDUFS6/ATP5L/ATP5J/ATP5G3/GBAS/DNAJC15/NDUFA1/DYNC1H1/ABCA2/ATP5G1/UQCR10/NDUFB8/NDUFC1/NDUFA4/ATP5C1/NDUFB1/NDUFS3/ABCC1/ATP5I/ATP5H/NDUFB4/NDUFB2/NDUFAB1/ATP5O/ATP5F1/NDUFB3	30
yellow.GO:0009142	GO:0009142	nucleoside triphosphate biosynthetic process	11/288	67/16119	2.58972e-08	3.06933e-06	2.82961e-06	ATP5L/ATP5J/ATP5G3/GBAS/NME1/ATP5G1/ATP5C1/ATP5I/ATP5H/ATP5O/ATP5F1	11
yellow.GO:0042451	GO:0042451	purine nucleoside biosynthetic process	12/288	92/16119	8.5562e-08	9.38963e-06	8.65627e-06	ATP5L/ATP5J/ATP5G3/GBAS/NME1/ATP5G1/ATP5C1/ATP5I/ATP5H/PAPSS1/ATP5O/ATP5F1	12
yellow.GO:0046129	GO:0046129	purine ribonucleoside biosynthetic process	12/288	92/16119	8.5562e-08	9.38963e-06	8.65627e-06	ATP5L/ATP5J/ATP5G3/GBAS/NME1/ATP5G1/ATP5C1/ATP5I/ATP5H/PAPSS1/ATP5O/ATP5F1	12
yellow.GO:0009127	GO:0009127	purine nucleoside monophosphate biosynthetic process	10/288	63/16119	1.57215e-07	1.6063e-05	1.48084e-05	ATP5L/ATP5J/ATP5G3/GBAS/ATP5G1/ATP5C1/ATP5I/ATP5H/ATP5O/ATP5F1	10
yellow.GO:0009168	GO:0009168	purine ribonucleoside monophosphate biosynthetic process	10/288	63/16119	1.57215e-07	1.6063e-05	1.48084e-05	ATP5L/ATP5J/ATP5G3/GBAS/ATP5G1/ATP5C1/ATP5I/ATP5H/ATP5O/ATP5F1	10
yellow.GO:0009124	GO:0009124	nucleoside monophosphate biosynthetic process	11/288	84/16119	2.86029e-07	2.82501e-05	2.60437e-05	ATP5L/ATP5J/ATP5G3/GBAS/ATP5G1/ATP5C1/ATP5I/ATP5H/ATP5O/ATP5F1/DGUOK	11
yellow.GO:0042455	GO:0042455	ribonucleoside biosynthetic process	12/288	107/16119	4.60672e-07	4.40313e-05	4.05923e-05	ATP5L/ATP5J/ATP5G3/GBAS/NME1/ATP5G1/ATP5C1/ATP5I/ATP5H/PAPSS1/ATP5O/ATP5F1	12
yellow.GO:0015672	GO:0015672	monovalent inorganic cation transport	25/288	452/16119	6.04149e-07	5.59404e-05	5.15713e-05	ATP6V1E1/COA6/COX5B/ATP6V0E1/PARK7/COX5A/ATP5L/ATP5J/ATP5G3/COX7C/ATP5G1/UQCR10/SLC2A10/NDUFA4/ATP5C1/UQCRQ/COX8A/ATP5I/ATP5H/COX7B/COX4I1/COX7A2/ATP5O/ATP5F1/COX6A1	25
yellow.GO:0009156	GO:0009156	ribonucleoside monophosphate biosynthetic process	10/288	77/16119	1.08268e-06	9.65741e-05	8.90313e-05	ATP5L/ATP5J/ATP5G3/GBAS/ATP5G1/ATP5C1/ATP5I/ATP5H/ATP5O/ATP5F1	10
yellow.GO:0009163	GO:0009163	nucleoside biosynthetic process	12/288	116/16119	1.10817e-06	9.65741e-05	8.90313e-05	ATP5L/ATP5J/ATP5G3/GBAS/NME1/ATP5G1/ATP5C1/ATP5I/ATP5H/PAPSS1/ATP5O/ATP5F1	12
yellow.GO:0021539	GO:0021539	subthalamus development	8/288	45/16119	1.14456e-06	9.68956e-05	8.93277e-05	SEC16A/LDHA/CDC42/ATP5J/DYNLL1/NDUFS3/UQCRQ/ATP5F1	8
yellow.GO:1901659	GO:1901659	glycosyl compound biosynthetic process	12/288	117/16119	1.21539e-06	0.000100034	9.22206e-05	ATP5L/ATP5J/ATP5G3/GBAS/NME1/ATP5G1/ATP5C1/ATP5I/ATP5H/PAPSS1/ATP5O/ATP5F1	12
yellow.GO:0021762	GO:0021762	substantia nigra development	7/288	43/16119	1.00377e-05	0.000803832	0.00074105	SEC16A/LDHA/CDC42/ATP5J/DYNLL1/NDUFS3/ATP5F1	7
yellow.GO:0098662	GO:0098662	inorganic cation transmembrane transport	24/288	499/16119	1.12349e-05	0.000876023	0.000807603	ATP6V1E1/COA6/COX5B/ATP6V0E1/COX5A/GSTO1/ATP5L/ATP5J/ATP5G3/COX7C/ATP5G1/UQCR10/NDUFA4/ATP5C1/UQCRQ/COX8A/ATP5I/ATP5H/COX7B/COX4I1/COX7A2/ATP5O/ATP5F1/COX6A1	24
yellow.GO:0007005	GO:0007005	mitochondrion organization	17/288	304/16119	3.48749e-05	0.0026496	0.00244266	MTX2/COA3/PARL/PARK7/NDUFS6/COX14/PPP2CB/TIMM9/ATPIF1/SLIRP/DYNLL1/FAM162A/SSBP1/POLG/NDUFAF4/TIMM8B/NDUFA13	17
yellow.GO:0048857	GO:0048857	neural nucleus development	7/288	64/16119	0.00014054	0.0104105	0.00959741	SEC16A/LDHA/CDC42/ATP5J/DYNLL1/NDUFS3/ATP5F1	7
yellow.GO:0043248	GO:0043248	proteasome assembly	3/288	8/16119	0.000295768	0.0208657	0.019236	PSMG1/POMP/PSMG2	3
yellow.GO:0045116	GO:0045116	protein neddylation	3/288	8/16119	0.000295768	0.0208657	0.019236	RBX1/RNF7/NEDD8	3
yellow.GO:0072522	GO:0072522	purine-containing compound biosynthetic process	13/288	245/16119	0.00047968	0.0330533	0.0304717	ATP5L/ATP5J/ATP5G3/GBAS/NME1/ATP5G1/ATP5C1/ATP5I/ATP5H/PAPSS1/ATP5O/ATP5F1/DGUOK	13
yellow.GO:0008380	GO:0008380	RNA splicing	16/288	346/16119	0.000514115	0.034621	0.031917	TRPT1/BCAS2/SNRNP27/POLR2L/DNAJC8/LSM3/THOC7/PPIH/SF3B6/SNRPG/CWC15/SNRPF/SNRPE/C14orf166/SRRM2/SAP18	16
yellow.GO:0009152	GO:0009152	purine ribonucleotide biosynthetic process	12/288	225/16119	0.000751023	0.0494507	0.0455884	ATP5L/ATP5J/ATP5G3/GBAS/NME1/ATP5G1/ATP5C1/ATP5I/ATP5H/PAPSS1/ATP5O/ATP5F1	12
