# Supplementary material for: Candidate genes in gastric cancer identified by constructing a weighted gene co-expression network
Source: PeerJ. 2018 May 4;6:e4692. doi: 10.7717/peerj.4692 (PMC5937478; doi:10.7717/peerj.4692)
Supplement: Table S7 [file peerj-06-4692-s008.xlsx]

## Sheet: KEGG
Module	ID	Description	GeneRatio	BgRatio	pvalue	p.adjust	qvalue	geneID	Count
blue.hsa04110	hsa04110	Cell cycle	34/335	124/7383	3.57875e-18	8.62478e-16	7.87324e-16	8881/699/1027/5885/5347/7534/991/4172/9133/701/5591/10735/4085/890/4173/7531/9126/8243/7532/7027/5925/8454/4174/4175/9184/983/4609/4171/891/9232/3065/10971/1017/6502	34
blue.hsa03040	hsa03040	Spliceosome	29/335	134/7383	9.29867e-13	1.12049e-10	1.02285e-10	23020/23450/51645/10713/6426/3190/55696/9343/22985/3178/10594/55660/1665/3183/22938/84991/6428/6432/51729/27339/10992/4686/23350/10291/4670/10946/220988/3192/9416	29
blue.hsa03013	hsa03013	RNA transport	27/335	171/7383	1.02152e-08	8.20618e-07	7.49112e-07	55706/5905/7514/26986/23511/5901/10460/8661/22985/11260/10419/60528/1968/23165/8667/9972/11171/1981/3837/1964/4686/10762/1965/8664/4928/3646/96764	27
blue.hsa04114	hsa04114	Oocyte meiosis	19/335	124/7383	2.65446e-06	0.000159931	0.000145995	5534/8881/699/5347/7534/991/9133/4085/7531/9126/8243/7532/8454/5501/983/891/9232/10971/1017	19
blue.hsa03030	hsa03030	DNA replication	9/335	36/7383	2.32314e-05	0.00111975	0.00102218	5983/4172/2237/6118/4173/4174/4175/6117/4171	9
blue.hsa04120	hsa04120	Ubiquitin mediated proteolysis	18/335	137/7383	4.24072e-05	0.0014698	0.00134172	8451/8881/7334/54926/9690/991/7323/1642/11059/6921/8454/7326/9039/27339/7428/3093/6502/10054	18
blue.hsa05169	hsa05169	Epstein-Barr virus infection	23/335	203/7383	4.26912e-05	0.0014698	0.00134172	1027/27044/7874/7534/7514/890/5901/7531/7532/22938/5925/983/5432/4609/5431/3065/5430/10971/1017/5757/5713/6502/5440	23
blue.hsa00970	hsa00970	Aminoacyl-tRNA biosynthesis	11/335	66/7383	0.000162335	0.00489033	0.0044642	55157/2058/55699/8565/51520/3735/3376/10056/57038/16/5917	11
blue.hsa00670	hsa00670	One carbon pool by folate	6/335	20/7383	0.00018826	0.00504119	0.00460192	471/2618/7298/6472/4522/10797	6
blue.hsa03015	hsa03015	mRNA surveillance pathway	13/335	91/7383	0.000212497	0.00512118	0.00467493	10914/9887/1478/2107/26986/22985/26528/11051/5501/79869/51692/4686/2935	13
blue.hsa00230	hsa00230	Purine metabolism	18/335	175/7383	0.000936845	0.0205254	0.0187369	5631/3614/1633/5634/2984/159/471/6241/2618/55276/204/5432/10606/5431/6240/5430/11164/5440	18
blue.hsa00020	hsa00020	Citrate cycle (TCA cycle)	6/335	30/7383	0.0019642	0.0378349	0.0345381	8803/1738/50/1431/1743/1737	6
blue.hsa03450	hsa03450	Non-homologous end-joining	4/335	13/7383	0.00214839	0.0378349	0.0345381	7520/2237/5591/2547	4
blue.hsa01200	hsa01200	Carbon metabolism	13/335	116/7383	0.00219788	0.0378349	0.0345381	5631/84706/8803/5634/1738/6472/50/1431/1743/3030/2806/1737/29968	13
blue.hsa03008	hsa03008	Ribosome biogenesis in eukaryotes	12/335	106/7383	0.00295271	0.0474403	0.0433065	65083/26354/7514/5901/23160/23560/28987/55341/55226/84916/51096/54433	12
brown.hsa05216	hsa05216	Thyroid cancer	8/181	37/7383	2.34936e-06	0.000473653	0.000317473	5595/7175/8031/8030/7157/5605/3265/5594	8
brown.hsa04720	hsa04720	Long-term potentiation	10/181	67/7383	4.51986e-06	0.000473653	0.000317473	5595/5499/5605/3265/2033/5594/6197/468/5578/5530	10
brown.hsa04722	hsa04722	Neurotrophin signaling pathway	13/181	119/7383	6.07248e-06	0.000473653	0.000317473	6272/5781/5595/2309/396/6654/7157/5605/572/3265/5594/6197/468	13
brown.hsa05223	hsa05223	Non-small cell lung cancer	9/181	66/7383	2.91176e-05	0.00170338	0.00114172	5595/2309/6654/7157/5605/572/3265/5594/5578	9
brown.hsa05213	hsa05213	Endometrial cancer	8/181	58/7383	7.515e-05	0.00351702	0.00235734	5595/2309/6654/7157/5605/572/3265/5594	8
brown.hsa05215	hsa05215	Prostate cancer	10/181	97/7383	0.000121398	0.00473453	0.00317339	5595/6654/7157/5605/572/2950/3265/2033/5594/468	10
brown.hsa04810	hsa04810	Regulation of actin cytoskeleton	15/181	208/7383	0.000167867	0.0050013	0.0033522	9475/10787/5595/5216/55845/6654/5499/5605/55970/3265/10093/5594/6093/8826/1072	15
brown.hsa04137	hsa04137	Mitophagy - animal	8/181	65/7383	0.000170984	0.0050013	0.0033522	11337/2309/7314/7157/6667/3265/4077/468	8
brown.hsa05132	hsa05132	Salmonella infection	9/181	86/7383	0.000237493	0.0060977	0.00408708	9475/5595/5216/83547/10093/5594/6093/7082/29108	9
brown.hsa05211	hsa05211	Renal cell carcinoma	8/181	69/7383	0.000260586	0.0060977	0.00408708	5781/5595/6654/5605/572/3265/2033/5594	8
brown.hsa04216	hsa04216	Ferroptosis	6/181	40/7383	0.000383442	0.00735678	0.00493099	2879/8031/7157/112483/2495/7417	6
brown.hsa01524	hsa01524	Platinum drug resistance	8/181	73/7383	0.000385431	0.00735678	0.00493099	2948/5595/7157/572/2950/331/7155/5594	8
brown.hsa05205	hsa05205	Proteoglycans in cancer	14/181	203/7383	0.000438989	0.00735678	0.00493099	9475/5781/5595/967/6654/7157/5499/5605/3265/5594/5578/6093/1655/8826	14
brown.hsa05219	hsa05219	Bladder cancer	6/181	41/7383	0.000440149	0.00735678	0.00493099	5595/7157/5605/3265/1612/5594	6
brown.hsa04919	hsa04919	Thyroid hormone signaling pathway	10/181	116/7383	0.000527095	0.0075847	0.00508376	9969/5595/7157/5605/572/3265/2033/5594/10499/5578	10
brown.hsa01522	hsa01522	Endocrine resistance	9/181	96/7383	0.000542827	0.0075847	0.00508376	5595/182/6654/7157/5605/572/6667/3265/5594	9
brown.hsa04370	hsa04370	VEGF signaling pathway	7/181	59/7383	0.000551025	0.0075847	0.00508376	5595/5605/572/3265/5594/5578/5530	7
brown.hsa05220	hsa05220	Chronic myeloid leukemia	8/181	78/7383	0.000605861	0.00787619	0.00527914	5781/5595/6654/7157/5605/572/3265/5594	8
brown.hsa01521	hsa01521	EGFR tyrosine kinase inhibitor resistance	8/181	79/7383	0.000660252	0.00813153	0.00545028	5595/2309/6654/5605/572/3265/5594/5578	8
brown.hsa05161	hsa05161	Hepatitis B	11/181	144/7383	0.000782419	0.0091543	0.00613581	3454/5595/7157/5605/572/3265/2033/5594/468/5578/1654	11
brown.hsa05131	hsa05131	Shigellosis	7/181	65/7383	0.000993958	0.0110755	0.00742355	9475/5595/7322/5216/10093/5594/6093	7
brown.hsa04140	hsa04140	Autophagy - animal	10/181	128/7383	0.00113821	0.0115416	0.00773592	11337/51100/5595/9821/5605/572/5562/3265/1612/5594	10
brown.hsa04150	hsa04150	mTOR signaling pathway	11/181	151/7383	0.00115856	0.0115416	0.00773592	5595/55004/6654/5605/5562/3265/51719/5594/6197/5578/28956	11
brown.hsa04360	hsa04360	Axon guidance	12/181	175/7383	0.00118375	0.0115416	0.00773592	9475/659/5781/5595/1948/3265/5594/5578/6093/1943/1072/5530	12
brown.hsa04068	hsa04068	FoxO signaling pathway	10/181	132/7383	0.00143931	0.013472	0.00902979	11337/5595/2309/5934/6654/5605/5562/3265/2033/5594	10
brown.hsa00920	hsa00920	Sulfur metabolism	3/181	10/7383	0.00153164	0.0137848	0.00923945	4357/23474/54928	3
brown.hsa05214	hsa05214	Glioma	7/181	71/7383	0.00167869	0.0145486	0.00975143	5595/6654/7157/5605/3265/5594/5578	7
brown.hsa05167	hsa05167	Kaposi's sarcoma-associated herpesvirus infection	12/181	186/7383	0.00199376	0.0162167	0.0108695	11337/3454/5595/8717/7314/7157/5605/55970/3265/2033/5594/5530	12
brown.hsa04210	hsa04210	Apoptosis	10/181	138/7383	0.00200977	0.0162167	0.0108695	5595/8717/143/7157/5605/572/3265/331/5594/468	10
brown.hsa04071	hsa04071	Sphingolipid signaling pathway	9/181	118/7383	0.00236216	0.0184248	0.0123495	9475/5595/8717/7157/5605/3265/5594/5578/6093	9
brown.hsa05016	hsa05016	Huntington's disease	12/181	193/7383	0.0027137	0.0192738	0.0129186	7384/513/7157/4713/4723/6667/2033/5439/4696/54539/1212/7417	12
brown.hsa04621	hsa04621	NOD-like receptor signaling pathway	11/181	168/7383	0.0027181	0.0192738	0.0129186	11337/3454/5595/55914/1535/23118/25828/331/5594/7417/29108	11
brown.hsa05225	hsa05225	Hepatocellular carcinoma	11/181	168/7383	0.0027181	0.0192738	0.0129186	2948/5595/6654/7157/5605/572/2950/55274/3265/5594/5578	11
brown.hsa05010	hsa05010	Alzheimer's disease	11/181	171/7383	0.00311832	0.0214614	0.0143848	5595/7384/3028/513/4713/572/4723/5594/4696/54539/5530	11
brown.hsa04714	hsa04714	Thermogenesis	13/181	229/7383	0.00402399	0.0269033	0.0180323	7384/6654/513/4713/4723/1374/5562/3265/51780/4696/54539/25915/6197	13
brown.hsa04921	hsa04921	Oxytocin signaling pathway	10/181	153/7383	0.00425588	0.0276632	0.0185417	9475/5595/5499/5605/5562/3265/5594/5578/6093/5530	10
brown.hsa04350	hsa04350	TGF-beta signaling pathway	7/181	84/7383	0.00438191	0.0277126	0.0185748	659/5595/6667/2033/5594/4681/6093	7
brown.hsa04012	hsa04012	ErbB signaling pathway	7/181	86/7383	0.00499036	0.0299422	0.0200692	5595/6654/5605/572/3265/5594/5578	7
brown.hsa05210	hsa05210	Colorectal cancer	7/181	86/7383	0.00499036	0.0299422	0.0200692	5595/6654/7157/5605/572/3265/5594	7
brown.hsa04650	hsa04650	Natural killer cell mediated cytotoxicity	9/181	133/7383	0.00525879	0.0306426	0.0205387	3454/5781/5595/6654/5605/3265/5594/5578/5530	9
brown.hsa05221	hsa05221	Acute myeloid leukemia	6/181	66/7383	0.00536901	0.0306426	0.0205387	5595/6654/5605/572/3265/5594	6
brown.hsa04540	hsa04540	Gap junction	7/181	88/7383	0.00566035	0.0309848	0.020768	5595/6654/5605/3265/5594/5578/7082	7
brown.hsa04010	hsa04010	MAPK signaling pathway	15/181	295/7383	0.00576491	0.0309848	0.020768	5595/8717/6654/23118/7157/3727/5605/55970/3265/5594/6197/468/5578/1943/5530	15
brown.hsa04218	hsa04218	Cellular senescence	10/181	160/7383	0.0058262	0.0309848	0.020768	5595/2309/5934/7157/5499/5605/3265/5594/7417/5530	10
brown.hsa04664	hsa04664	Fc epsilon RI signaling pathway	6/181	68/7383	0.0062133	0.0323092	0.0216557	5595/6654/5605/3265/5594/5578	6
brown.hsa04022	hsa04022	cGMP-PKG signaling pathway	10/181	163/7383	0.00662401	0.0330418	0.0221468	9475/5595/5499/5605/572/5594/468/6093/7417/5530	10
brown.hsa04910	hsa04910	Insulin signaling pathway	9/181	138/7383	0.0066744	0.0330418	0.0221468	5595/6654/5499/5605/572/5573/5562/3265/5594	9
brown.hsa04217	hsa04217	Necroptosis	10/181	164/7383	0.00690803	0.0330418	0.0221468	3454/8717/55766/143/331/27243/57132/2495/7417/29108	10
brown.hsa04917	hsa04917	Prolactin signaling pathway	6/181	70/7383	0.00715042	0.0330418	0.0221468	5595/2309/6654/5605/3265/5594	6
brown.hsa04912	hsa04912	GnRH signaling pathway	7/181	92/7383	0.00719984	0.0330418	0.0221468	5595/6654/5605/3265/5594/468/5578	7
brown.hsa04141	hsa04141	Protein processing in endoplasmic reticulum	10/181	165/7383	0.00720142	0.0330418	0.0221468	7322/23471/6748/6746/6400/4121/3998/468/10802/10427	10
brown.hsa04662	hsa04662	B cell receptor signaling pathway	6/181	71/7383	0.0076555	0.0344497	0.0230905	5595/6654/5605/3265/5594/5530	6
brown.hsa05218	hsa05218	Melanoma	6/181	72/7383	0.00818584	0.0361413	0.0242242	5595/7157/5605/572/3265/5594	6
brown.hsa04510	hsa04510	Focal adhesion	11/181	199/7383	0.00960912	0.0416395	0.0279095	9475/5595/394/6654/5499/572/3265/331/5594/5578/6093	11
brown.hsa05203	hsa05203	Viral carcinogenesis	11/181	201/7383	0.0103144	0.0438832	0.0294134	3516/5595/8717/5934/7157/572/3265/2033/5594/468/1654	11
brown.hsa05231	hsa05231	Choline metabolism in cancer	7/181	99/7383	0.0106118	0.0443421	0.029721	5595/6654/5605/6667/3265/5594/5578	7
brown.hsa05165	hsa05165	Human papillomavirus infection	15/181	319/7383	0.0114853	0.0471501	0.0316031	3516/3454/5595/8717/5934/182/6654/7157/5605/572/3265/2033/5594/10474/57801	15
cyan.hsa04662	hsa04662	B cell receptor signaling pathway	8/72	71/7383	3.58309e-07	5.87626e-05	4.82774e-05	5880/3635/973/118788/6850/5777/84433/2885	8
cyan.hsa04380	hsa04380	Osteoclast differentiation	9/72	128/7383	3.61489e-06	0.000271367	0.000222946	4689/3932/3716/8651/6850/4791/5971/7297/2885	9
cyan.hsa04650	hsa04650	Natural killer cell mediated cytotoxicity	9/72	133/7383	4.96403e-06	0.000271367	0.000222946	355/3689/5880/3932/6850/5777/369/2185/2885	9
cyan.hsa04666	hsa04666	Fc gamma R-mediated phagocytosis	6/72	91/7383	0.000241482	0.00990077	0.00813413	5788/7454/5880/3635/6850/10109	6
cyan.hsa04064	hsa04064	NF-kappa B signaling pathway	6/72	95/7383	0.000305358	0.0100157	0.00822859	3932/6850/4791/5971/84433/142	6
cyan.hsa05340	hsa05340	Primary immunodeficiency	4/72	37/7383	0.000430623	0.0116181	0.00954503	5788/973/5993/3932	4
cyan.hsa04664	hsa04664	Fc epsilon RI signaling pathway	5/72	68/7383	0.000495894	0.0116181	0.00954503	241/5880/3635/6850/2885	5
cyan.hsa04520	hsa04520	Adherens junction	5/72	72/7383	0.00064583	0.0132395	0.0108771	7454/5880/5777/5770/5795	5
cyan.hsa04010	hsa04010	MAPK signaling pathway	9/72	295/7383	0.00213656	0.0386259	0.0317338	355/5880/4791/5971/369/2872/6789/1844/2885	9
cyan.hsa01522	hsa01522	Endocrine resistance	5/72	96/7383	0.00235524	0.0386259	0.0317338	109/369/8202/638/2885	5
cyan.hsa04072	hsa04072	Phospholipase D signaling pathway	6/72	146/7383	0.00288417	0.0421209	0.0346051	6850/57121/109/10672/2185/2885	6
cyan.hsa04660	hsa04660	T cell receptor signaling pathway	5/72	103/7383	0.00320045	0.0421209	0.0346051	5788/3932/5777/84433/2885	5
cyan.hsa05205	hsa05205	Proteoglycans in cancer	7/72	203/7383	0.00347685	0.0421209	0.0346051	355/3059/5777/369/9138/27250/2885	7
cyan.hsa05131	hsa05131	Shigellosis	4/72	65/7383	0.00359569	0.0421209	0.0346051	3059/7454/391/10109	4
cyan.hsa04810	hsa04810	Regulation of actin cytoskeleton	7/72	208/7383	0.00397688	0.0434806	0.0357222	3689/7454/5880/10672/369/9138/10109	7
cyan.hsa04670	hsa04670	Leukocyte transendothelial migration	5/72	112/7383	0.00458449	0.046991	0.0386062	3689/6494/5880/4689/2185	5
darkgreen	hsa04915	Estrogen signaling pathway	43208	137/7383	0.000283677	0.0133328	0.0128401	3880/3858/54474/5914	4
greenyellow.hsa04510	hsa04510	Focal adhesion	10/80	199/7383	5.14173e-05	0.00940936	0.00801027	858/3691/3909/5829/3914/3918/2317/5604/7410/3675	10
greenyellow.hsa04978	hsa04978	Mineral absorption	5/80	51/7383	0.000209413	0.0187569	0.0159679	4502/4501/4495/4493/4494	5
greenyellow.hsa04010	hsa04010	MAPK signaling pathway	11/80	295/7383	0.00030749	0.0187569	0.0159679	1969/3315/7039/9064/1847/374/2317/5604/1848/9448/3845	11
greenyellow.hsa04360	hsa04360	Axon guidance	8/80	175/7383	0.00057495	0.0214091	0.0182258	3983/6405/1969/2041/5361/29984/3984/3845	8
greenyellow.hsa05230	hsa05230	Central carbon metabolism in cancer	5/80	65/7383	0.000654256	0.0214091	0.0182258	3098/6513/8140/5604/3845	5
greenyellow.hsa05221	hsa05221	Acute myeloid leukemia	5/80	66/7383	0.000701939	0.0214091	0.0182258	5467/5292/5604/1848/3845	5
greenyellow.hsa05205	hsa05205	Proteoglycans in cancer	8/80	203/7383	0.00151114	0.0380832	0.0324206	858/5829/8323/2317/5604/5328/7410/3845	8
greenyellow.hsa00340	hsa00340	Histidine metabolism	3/80	23/7383	0.00185587	0.0380832	0.0324206	223/224/218	3
greenyellow.hsa04512	hsa04512	ECM-receptor interaction	5/80	82/7383	0.00187294	0.0380832	0.0324206	3691/3909/3914/3918/3675	5
grey60.hsa01230	hsa01230	Biosynthesis of amino acids	11/226	74/7383	1.32499e-05	0.00341848	0.00331946	5831/5223/3418/65263/5211/226/445/7086/2597/7167/2023	11
grey60.hsa03040	hsa03040	Spliceosome	13/226	134/7383	0.000218342	0.0281661	0.0273502	9775/22827/84844/56949/9128/5093/9092/10523/6631/4809/6634/10189/25804	13
lightcyan.hsa04064	hsa04064	NF-kappa B signaling pathway	8/58	95/7383	6.30704e-07	7.94687e-05	6.43982e-05	7412/6363/4050/4790/4792/29760/6366/7128	8
lightcyan.hsa04658	hsa04658	Th1 and Th2 cell differentiation	7/58	92/7383	6.64447e-06	0.000418602	0.000339218	915/3560/916/6776/4790/4792/864	7
lightcyan.hsa04062	hsa04062	Chemokine signaling pathway	9/58	185/7383	1.18357e-05	0.0004971	0.00040283	6363/10563/7852/9547/4790/8976/4792/6366/409	9
lightcyan.hsa04659	hsa04659	Th17 cell differentiation	7/58	107/7383	1.8054e-05	0.000568702	0.000460853	915/3560/916/6776/9466/4790/4792	7
lightcyan.hsa05166	hsa05166	HTLV-I infection	10/58	255/7383	2.44658e-05	0.000616537	0.000499617	915/3560/2113/916/3683/7412/6776/94241/4790/4792	10
lightcyan.hsa05162	hsa05162	Measles	7/58	134/7383	7.71194e-05	0.00161951	0.00131238	915/3560/916/6776/4790/4792/7128	7
lightcyan.hsa04640	hsa04640	Hematopoietic cell lineage	5/58	97/7383	0.000932561	0.0167861	0.0136028	914/915/916/951/924	5
lightcyan.hsa04060	hsa04060	Cytokine-cytokine receptor interaction	8/58	270/7383	0.00112902	0.0171112	0.0138662	3560/6363/10563/7852/1439/4050/9547/6366	8
lightcyan.hsa04660	hsa04660	T cell receptor signaling pathway	5/58	103/7383	0.00122223	0.0171112	0.0138662	915/3937/916/4790/4792	5
lightcyan.hsa05131	hsa05131	Shigellosis	4/58	65/7383	0.00162554	0.0204818	0.0165976	4790/8976/4792/2017	4
lightcyan.hsa04144	hsa04144	Endocytosis	7/58	244/7383	0.00281983	0.0307778	0.0249411	3560/6643/7852/91782/8976/30011/409	7
lightcyan.hsa05340	hsa05340	Primary immunodeficiency	3/58	37/7383	0.00295801	0.0307778	0.0249411	915/916/29760	3
lightcyan.hsa05220	hsa05220	Chronic myeloid leukemia	4/58	78/7383	0.00317549	0.0307778	0.0249411	6776/4790/1647/4792	4
lightcyan.hsa04514	hsa04514	Cell adhesion molecules (CAMs)	5/58	145/7383	0.00541722	0.048755	0.0395091	914/6404/3683/7412/6402	5
lightyellow.hsa03040	hsa03040	Spliceosome	9/35	134/7383	7.72817e-09	5.02331e-07	5.02331e-07	6431/57187/29896/23658/55119/6429/58517/25949/6629	9
lightyellow.hsa03013	hsa03013	RNA transport	8/35	171/7383	9.70654e-07	3.15463e-05	3.15463e-05	65109/5411/57187/8894/9669/8669/26019/10250	8
lightyellow.hsa03015	hsa03015	mRNA surveillance pathway	5/35	91/7383	6.17494e-05	0.0013379	0.0013379	65109/5411/8106/26019/10250	5
midnightblue.hsa05168	hsa05168	Herpes simplex infection	18/68	185/7383	2.82859e-14	3.13973e-12	2.14377e-12	6773/6891/6772/64135/4939/3133/5371/6890/3717/5610/4938/3665/4940/3134/4615/3106/3107/3105	18
midnightblue.hsa05164	hsa05164	Influenza A	17/68	173/7383	1.40133e-13	7.77736e-12	5.31029e-12	6773/8743/6772/3383/64135/3627/4939/834/5371/4599/3717/5610/4938/3665/4940/4615/103	17
midnightblue.hsa04621	hsa04621	NOD-like receptor signaling pathway	16/68	168/7383	1.32971e-12	4.91994e-11	3.35927e-11	2634/114769/6773/2633/837/115361/6772/330/4939/834/8767/4938/3665/4940/2635/4615	16
midnightblue.hsa05162	hsa05162	Measles	13/68	134/7383	1.72974e-10	4.80004e-09	3.27741e-09	6773/8743/6772/64135/4939/4599/3717/5610/4938/3665/4940/4615/103	13
midnightblue.hsa04612	hsa04612	Antigen processing and presentation	9/68	77/7383	2.71882e-08	6.03579e-07	4.12116e-07	6891/3133/5720/6890/6892/3134/3106/3107/3105	9
midnightblue.hsa05167	hsa05167	Kaposi's sarcoma-associated herpesvirus infection	12/68	186/7383	9.73936e-08	1.80178e-06	1.23023e-06	6773/6772/3383/3133/3717/5610/3665/3134/3106/3107/3105/578	12
midnightblue.hsa05160	hsa05160	Hepatitis C	9/68	131/7383	2.6924e-06	4.26938e-05	2.91508e-05	6773/6772/3659/4939/5610/4938/9076/3665/4940	9
midnightblue.hsa05165	hsa05165	Human papillomavirus infection	13/68	319/7383	5.23826e-06	7.26809e-05	4.96256e-05	6773/6772/3659/3133/4599/5610/9636/8638/3134/3106/3107/3105/578	13
midnightblue.hsa05416	hsa05416	Viral myocarditis	6/68	59/7383	1.49817e-05	0.000184774	0.000126161	3383/3133/3134/3106/3107/3105	6
midnightblue.hsa05330	hsa05330	Allograft rejection	5/68	38/7383	2.2652e-05	0.000251437	0.000171678	3133/3134/3106/3107/3105	5
midnightblue.hsa05332	hsa05332	Graft-versus-host disease	5/68	41/7383	3.31048e-05	0.000334057	0.00022809	3133/3134/3106/3107/3105	5
midnightblue.hsa04940	hsa04940	Type I diabetes mellitus	5/68	43/7383	4.1922e-05	0.000387779	0.000264771	3133/3134/3106/3107/3105	5
midnightblue.hsa04145	hsa04145	Phagosome	8/68	152/7383	6.97056e-05	0.000595179	0.000406381	6891/3133/6890/9341/3134/3106/3107/3105	8
midnightblue.hsa05320	hsa05320	Autoimmune thyroid disease	5/68	53/7383	0.000116398	0.000880261	0.000601032	3133/3134/3106/3107/3105	5
midnightblue.hsa04217	hsa04217	Necroptosis	8/68	164/7383	0.000118954	0.000880261	0.000601032	6773/8743/6772/330/834/3717/5610/10039	8
midnightblue.hsa05143	hsa05143	African trypanosomiasis	4/68	35/7383	0.000277959	0.00192834	0.00131665	3620/3383/8542/4615	4
midnightblue.hsa04514	hsa04514	Cell adhesion molecules (CAMs)	7/68	145/7383	0.000347308	0.0022496	0.001536	3383/3133/9076/3134/3106/3107/3105	7
midnightblue.hsa04620	hsa04620	Toll-like receptor signaling pathway	6/68	104/7383	0.0003648	0.0022496	0.001536	4283/6772/3627/6373/3665/4615	6
midnightblue.hsa05203	hsa05203	Viral carcinogenesis	8/68	201/7383	0.000477809	0.00279141	0.00190594	3133/5610/3665/3134/3106/3107/3105/578	8
midnightblue.hsa03050	hsa03050	Proteasome	4/68	45/7383	0.000738103	0.00409647	0.00279702	5699/5720/5698/5696	4
midnightblue.hsa04650	hsa04650	Natural killer cell mediated cytotoxicity	6/68	133/7383	0.00133817	0.00707318	0.00482948	8743/3383/3133/3106/3107/3105	6
midnightblue.hsa04062	hsa04062	Chemokine signaling pathway	7/68	185/7383	0.00147703	0.00745229	0.00508834	6773/4283/6772/3627/6376/6373/3717	7
midnightblue.hsa05169	hsa05169	Epstein-Barr virus infection	7/68	203/7383	0.00250912	0.0121092	0.00826804	3383/3133/5610/3134/3106/3107/3105	7
midnightblue.hsa04623	hsa04623	Cytosolic DNA-sensing pathway	4/68	64/7383	0.00276108	0.01277	0.00871919	3627/834/3665/103	4
midnightblue.hsa04622	hsa04622	RIG-I-like receptor signaling pathway	4/68	70/7383	0.00382338	0.0169758	0.0115909	64135/3627/9636/3665	4
midnightblue.hsa05166	hsa05166	HTLV-I infection	7/68	255/7383	0.00868733	0.0370882	0.0253234	3601/3383/3133/3134/3106/3107/3105	7
midnightblue.hsa05161	hsa05161	Hepatitis B	5/68	144/7383	0.0102547	0.0421582	0.0287851	6773/6772/64135/3665/4615	5
purple	hsa03010	Ribosome	59/121	154/7383	1.87162e-70	2.45182e-68	2.45182e-68	51065/6230/6228/6155/6165/51187/6128/6138/51121/4736/6232/2197/6203/11224/200916/6157/6208/6181/6132/6229/6152/6161/9045/6173/6133/6222/6205/6147/6209/6129/6122/6217/6167/6201/6135/25873/6210/6223/6175/6234/6191/6136/6206/6168/6235/6159/6141/6193/6176/6218/6164/6188/6160/6204/6194/6146/6170/6233/6169	59
tan.hsa05150	hsa05150	Staphylococcus aureus infection	16/100	56/7383	9.92655e-18	1.62795e-15	1.22253e-15	712/719/714/2359/713/3115/3113/3109/2212/3111/3117/3122/3119/3123/3108/3426	16
tan.hsa04142	hsa04142	Lysosome	20/100	123/7383	9.92092e-17	8.13515e-15	6.1092e-15	2760/3988/1075/1514/1200/10577/427/9516/5641/1777/1520/54/3074/5660/5538/4668/9114/53/1509/410	20
tan.hsa05323	hsa05323	Rheumatoid arthritis	16/100	90/7383	3.53862e-14	1.93444e-12	1.4527e-12	10673/6352/3115/3113/3109/3111/3117/3122/3119/3123/1514/3108/54/526/1435/9114	16
tan.hsa04612	hsa04612	Antigen processing and presentation	15/100	77/7383	5.71285e-14	2.34227e-12	1.75896e-12	920/3115/3113/3109/3111/3117/3122/972/3119/567/3123/1514/3108/5641/1520	15
tan.hsa05310	hsa05310	Asthma	11/100	31/7383	1.08649e-13	3.56368e-12	2.67619e-12	3115/3113/3109/3111/3117/2207/3122/3119/3123/3108/958	11
tan.hsa05330	hsa05330	Allograft rejection	11/100	38/7383	1.42823e-12	3.90384e-11	2.93164e-11	3115/3113/3109/3111/3117/3122/3119/3123/3108/958/3002	11
tan.hsa04672	hsa04672	Intestinal immune network for IgA production	11/100	49/7383	3.05919e-11	7.16725e-10	5.38234e-10	10673/3115/3113/3109/3111/3117/3122/3119/3123/3108/958	11
tan.hsa05320	hsa05320	Autoimmune thyroid disease	11/100	53/7383	7.65425e-11	1.56912e-09	1.17835e-09	3115/3113/3109/3111/3117/3122/3119/3123/3108/958/3002	11
tan.hsa05332	hsa05332	Graft-versus-host disease	10/100	41/7383	1.04167e-10	1.89816e-09	1.42544e-09	3115/3113/3109/3111/3117/3122/3119/3123/3108/3002	10
tan.hsa04145	hsa04145	Phagosome	16/100	152/7383	1.4374e-10	2.35733e-09	1.77027e-09	3115/1536/3113/3109/2212/3111/3117/3122/3119/3123/1514/929/3108/1520/526/9114	16
tan.hsa04940	hsa04940	Type I diabetes mellitus	10/100	43/7383	1.74214e-10	2.54682e-09	1.91256e-09	3115/3113/3109/3111/3117/3122/3119/3123/3108/3002	10
tan.hsa05152	hsa05152	Tuberculosis	17/100	179/7383	1.86352e-10	2.54682e-09	1.91256e-09	3115/3113/3109/2212/3111/3117/2207/3122/972/3119/3123/929/3108/1520/387/9114/1509	17
tan.hsa04640	hsa04640	Hematopoietic cell lineage	13/100	97/7383	4.25604e-10	5.36916e-09	4.03204e-09	920/3115/3113/3109/1436/3111/3117/3122/3119/3123/929/3108/1435	13
tan.hsa05322	hsa05322	Systemic lupus erythematosus	14/100	133/7383	2.25432e-09	2.64077e-08	1.98312e-08	712/714/713/3115/3113/3109/2212/3111/3117/3122/3119/3123/3108/958	14
tan.hsa05140	hsa05140	Leishmaniasis	11/100	74/7383	3.32085e-09	3.63079e-08	2.72659e-08	3115/1536/3113/3109/2212/3111/3117/3122/3119/3123/3108	11
tan.hsa05416	hsa05416	Viral myocarditis	10/100	59/7383	4.77436e-09	4.89371e-08	3.675e-08	3115/3113/3109/3111/3117/3122/3119/3123/3108/958	10
tan.hsa05321	hsa05321	Inflammatory bowel disease (IBD)	10/100	65/7383	1.27212e-08	1.22722e-07	9.21599e-08	3115/3113/3109/3111/3117/3122/3119/3123/3108/3561	10
tan.hsa04658	hsa04658	Th1 and Th2 cell differentiation	11/100	92/7383	3.49328e-08	3.18277e-07	2.39014e-07	920/3115/3113/3109/3111/3117/3122/3119/3123/3108/3561	11
tan.hsa04659	hsa04659	Th17 cell differentiation	11/100	107/7383	1.70307e-07	1.47002e-06	1.10393e-06	920/3115/3113/3109/3111/3117/3122/3119/3123/3108/3561	11
tan.hsa05145	hsa05145	Toxoplasmosis	11/100	113/7383	2.98833e-07	2.45043e-06	1.84018e-06	23643/3115/3113/3109/3111/3117/3122/3119/3123/3108/958	11
tan.hsa04514	hsa04514	Cell adhesion molecules (CAMs)	11/100	145/7383	3.63628e-06	2.83976e-05	2.13256e-05	920/3115/3113/3109/3111/3117/3122/3119/3123/3108/958	11
tan.hsa05168	hsa05168	Herpes simplex infection	12/100	185/7383	6.57475e-06	4.90118e-05	3.6806e-05	6352/3115/3113/3109/3111/3117/3122/972/3119/3123/3108/10929	12
tan.hsa04610	hsa04610	Complement and coagulation cascades	8/100	79/7383	1.00918e-05	7.19586e-05	5.40382e-05	712/719/714/713/11326/5265/3426/5329	8
tan.hsa05164	hsa05164	Influenza A	10/100	173/7383	0.000107835	0.000736874	0.000553365	6352/3115/3113/3109/3111/3117/3122/3119/3123/3108	10
tan.hsa05166	hsa05166	HTLV-I infection	12/100	255/7383	0.00015642	0.00102612	0.000770577	3115/3113/3109/6688/3111/3117/3122/3119/3123/3108/958/3561	12
tan.hsa05133	hsa05133	Pertussis	6/100	76/7383	0.00054	0.00340615	0.00255789	23643/712/714/713/929/387	6
tan.hsa05020	hsa05020	Prion diseases	4/100	35/7383	0.00120203	0.00730119	0.00548292	6352/712/714/713	4
tan.hsa05169	hsa05169	Epstein-Barr virus infection	9/100	203/7383	0.00164559	0.00950658	0.00713909	3115/3113/6688/3117/3122/3119/3123/7533/958	9
tan.hsa04380	hsa04380	Osteoclast differentiation	7/100	128/7383	0.00168104	0.00950658	0.00713909	7305/2212/1436/6688/54209/54/1435	7
tan.hsa04064	hsa04064	NF-kappa B signaling pathway	6/100	95/7383	0.00174639	0.00954693	0.00716939	10673/23643/6351/929/958/597	6
tan.hsa04060	hsa04060	Cytokine-cytokine receptor interaction	10/100	270/7383	0.00344326	0.018216	0.0136795	10673/80301/6352/1436/6351/6362/958/3561/1435/7133	10
tan.hsa04979	hsa04979	Cholesterol metabolism	4/100	50/7383	0.00452855	0.0232088	0.017429	3988/10577/348/341	4
tan.hsa00740	hsa00740	Riboflavin metabolism	2/100	8/7383	0.00482256	0.0239667	0.0179981	54/53	2
turquoise.hsa04530	hsa04530	Tight junction	29/503	170/7383	3.30287e-06	0.000977649	0.000806595	3993/5906/50848/57530/154810/7846/4637/5566/4629/10398/5567/1364/5962/87/79784/27134/3688/9368/60/51421/1366/92359/5515/84612/1019/7430/5879/51208/5584	29
turquoise.hsa04141	hsa04141	Protein processing in endoplasmic reticulum	27/503	165/7383	1.59184e-05	0.00235592	0.00194371	573/27102/1410/9601/3309/7415/80267/10484/5034/7466/29978/10134/29927/811/2923/6184/55829/51726/3337/10808/64215/6747/3301/27248/10956/3703/1649	27
turquoise.hsa01200	hsa01200	Carbon metabolism	20/503	116/7383	9.50017e-05	0.00582114	0.00480265	48/3417/55902/128/6389/22934/2026/2805/8802/3099/2539/5160/80201/5315/5230/8801/2203/4191/5214/6888	20
turquoise.hsa05110	hsa05110	Vibrio cholerae infection	12/503	50/7383	9.76302e-05	0.00582114	0.00480265	5566/5567/9601/3784/375/11015/537/60/29927/11014/533/10312	12
turquoise.hsa04022	hsa04022	cGMP-PKG signaling pathway	25/503	163/7383	9.83301e-05	0.00582114	0.00480265	2982/2983/5997/10335/5350/4205/4638/493/476/10398/481/3710/3667/4209/5331/292/801/10488/488/6722/7416/490/5500/10105/483	25
turquoise.hsa00010	hsa00010	Glycolysis / Gluconeogenesis	14/503	68/7383	0.000155896	0.00769085	0.00634522	55902/128/2026/219/3099/130589/5106/5160/10327/80201/5315/5230/2203/5214	14
turquoise.hsa04970	hsa04970	Salivary secretion	16/503	90/7383	0.000327124	0.0138327	0.0114125	2982/2983/5566/6844/493/476/481/5567/3783/3710/6548/1755/5331/801/490/483	16
turquoise.hsa04971	hsa04971	Gastric acid secretion	14/503	75/7383	0.000456295	0.0157159	0.0129662	5566/4638/476/481/5567/3710/3784/6548/60/5331/801/760/7430/483	14
turquoise.hsa04270	hsa04270	Vascular smooth muscle contraction	19/503	121/7383	0.000490069	0.0157159	0.0129662	2982/2983/4637/10335/59/5566/800/4638/4629/10398/5567/72/3710/94274/5580/5331/801/10267/5500	19
turquoise.hsa04964	hsa04964	Proximal tubule bicarbonate reclamation	7/503	23/7383	0.000612991	0.0157159	0.0129662	476/481/358/8671/5106/760/483	7
turquoise.hsa05132	hsa05132	Salmonella infection	15/503	86/7383	0.000615726	0.0157159	0.0129662	2316/5603/2318/2920/10163/79784/60/1783/2919/10092/2921/7879/3459/5879/3460	15
turquoise.hsa00020	hsa00020	Citrate cycle (TCA cycle)	8/503	30/7383	0.000673468	0.0157159	0.0129662	48/3417/6389/8802/5106/5160/8801/4191	8
turquoise.hsa04972	hsa04972	Pancreatic secretion	16/503	96/7383	0.000690225	0.0157159	0.0129662	5646/5906/493/476/481/3710/3784/6548/5331/8671/760/488/5879/5874/490/483	16
turquoise.hsa04810	hsa04810	Regulation of actin cytoskeleton	27/503	208/7383	0.000843912	0.0178427	0.0147209	2934/23396/4638/7414/10398/5962/8395/87/10163/79784/6548/3655/3688/3678/60/6237/3985/79837/10092/7430/1729/5879/10788/55740/3673/4893/5500	27
turquoise.hsa04510	hsa04510	Focal adhesion	26/503	199/7383	0.000950275	0.0179144	0.01478	5906/55742/23396/2316/4638/7414/10398/857/2318/3371/3910/7094/87/3655/3688/3678/60/7791/3915/3913/1729/5879/894/329/3673/5500	26
turquoise.hsa00600	hsa00600	Sphingolipid metabolism	10/503	47/7383	0.00102887	0.0179144	0.01478	57704/7368/2581/8612/166929/130367/123099/55512/2717/9517	10
turquoise.hsa04961	hsa04961	Endocrine and other factor-regulated calcium reabsorption	10/503	47/7383	0.00102887	0.0179144	0.01478	5566/476/481/5567/1785/7421/5331/1211/490/483	10
turquoise.hsa00520	hsa00520	Amino sugar and nucleotide sugar metabolism	10/503	48/7383	0.00122215	0.0200975	0.0165812	2582/29926/2673/1727/3099/80201/54187/6675/2762/7358	10
turquoise.hsa04918	hsa04918	Thyroid hormone synthesis	13/503	74/7383	0.0013061	0.0203476	0.0167875	5566/476/2877/481/5567/9601/3309/3710/5331/10488/50506/2936/483	13
turquoise.hsa05100	hsa05100	Bacterial invasion of epithelial cells	13/503	76/7383	0.00168219	0.0241362	0.0199132	79767/7414/857/999/1785/10163/3688/3678/60/23607/1211/10092/5879	13
turquoise.hsa04261	hsa04261	Adrenergic signaling in cardiomyocytes	20/503	144/7383	0.00171237	0.0241362	0.0199132	5566/5350/5603/493/476/7168/481/5567/3784/7169/6548/5331/801/10488/5515/488/7170/490/5500/483	20
turquoise.hsa04976	hsa04976	Bile secretion	12/503	71/7383	0.00278113	0.036938	0.0304752	5566/476/481/5567/358/8714/6548/3949/8671/760/57552/483	12
turquoise.hsa05414	hsa05414	Dilated cardiomyopathy (DCM)	14/503	90/7383	0.00287018	0.036938	0.0304752	5566/5350/7168/1674/5567/6443/7169/3655/3688/3678/60/488/3673/7170	14
turquoise.hsa04611	hsa04611	Platelet activation	17/503	123/7383	0.00389664	0.0448025	0.0369637	2982/5906/2983/5566/4638/5603/5567/7094/3710/3688/60/5331/8673/3673/4067/5584/5500	17
turquoise.hsa05131	hsa05131	Shigellosis	11/503	65/7383	0.00407583	0.0448025	0.0369637	79767/5603/7414/25/10163/3688/3678/60/10092/1729/5879	11
turquoise.hsa00052	hsa00052	Galactose metabolism	7/503	31/7383	0.00408672	0.0448025	0.0369637	2582/2683/3099/130589/80201/2717/5214	7
turquoise.hsa00512	hsa00512	Mucin type O-glycan biosynthesis	7/503	31/7383	0.00408672	0.0448025	0.0369637	2591/56913/11227/9245/2650/55808/29071	7
yellow.hsa00190	hsa00190	Oxidative phosphorylation	38/167	133/7383	1.78845e-32	3.71998e-30	3.55808e-30	529/1329/4711/8992/9377/4726/10632/522/518/1350/4694/55967/6392/516/29796/4714/4717/4697/509/4707/4722/27089/1351/521/10476/4710/4708/1349/4706/1327/1347/51079/539/10063/515/4709/1337/6390	38
yellow.hsa04714	hsa04714	Thermogenesis	45/167	229/7383	8.85114e-31	9.20519e-29	8.80456e-29	28958/388753/1329/4711/9377/4726/6009/10632/522/518/84987/1350/4694/55967/6392/516/29796/4714/4717/4697/509/90993/4707/4722/27089/1351/521/10476/4710/4708/1349/51287/29078/4706/1327/1347/51079/539/10063/86/8289/515/4709/1337/6390	45
yellow.hsa05012	hsa05012	Parkinson's disease	34/167	142/7383	3.30373e-26	2.29059e-24	2.1909e-24	1329/4711/11315/9377/4726/522/518/1350/4694/55967/6392/516/29796/4714/4717/4697/509/4707/4722/27089/1351/10476/4710/4708/1349/4706/1327/1347/51079/539/515/4709/1337/6390	34
yellow.hsa05016	hsa05016	Huntington's disease	38/167	193/7383	6.20912e-26	3.22874e-24	3.08822e-24	1329/4711/9377/4726/522/518/1350/1387/5441/4694/55967/6647/6392/516/29796/4714/4717/4697/509/90993/4707/4722/27089/1351/10476/4710/4708/1349/4706/1327/1347/51079/539/515/4709/1337/6390/1639	38
yellow.hsa05010	hsa05010	Alzheimer's disease	33/167	171/7383	3.1156e-22	1.29609e-20	1.23968e-20	1329/4711/9377/4726/522/518/1350/4694/55967/6392/516/29796/4714/4717/4697/509/4707/4722/27089/1351/10476/4710/4708/1349/4706/1327/1347/51079/539/515/4709/1337/6390	33
yellow.hsa04932	hsa04932	Non-alcoholic fatty liver disease (NAFLD)	28/167	149/7383	1.31908e-18	4.57282e-17	4.3738e-17	1329/4711/9377/4726/998/1350/3643/4694/55967/6392/29796/4714/4717/4697/4707/4722/27089/1351/4710/4708/1349/4706/1327/1347/51079/4709/1337/6390	28
yellow.hsa04723	hsa04723	Retrograde endocannabinoid signaling	15/167	148/7383	1.0707e-06	3.18151e-05	3.04304e-05	4711/4726/2787/4694/55967/4714/4717/4697/4707/4722/4710/4708/4706/51079/4709	15
yellow.hsa04260	hsa04260	Cardiac muscle contraction	10/167	78/7383	8.94762e-06	0.000232638	0.000222513	1329/9377/1350/29796/27089/1351/1349/1327/1347/1337	10
yellow.hsa03060	hsa03060	Protein export	5/167	23/7383	0.000134867	0.00311692	0.00298126	6727/10952/28972/9789/23480	5
yellow.hsa03040	hsa03040	Spliceosome	10/167	134/7383	0.000874135	0.018182	0.0173907	153527/10286/11017/27258/10465/51639/6637/51503/6636/6635	10
yellow.hsa03010	hsa03010	Ribosome	10/167	154/7383	0.0024984	0.0472425	0.0451864	9553/64979/29074/51264/219927/55052/6166/54948/64960/54460	10
